# Supplementary material for: Regional Differences and Similarities in the Brain Transcriptome for Mice Selected for Ethanol Preference From HS-CC Founders
Source: Front Genet. 2018 Aug 28;9:300. doi: 10.3389/fgene.2018.00300 (PMC6120986; doi:10.3389/fgene.2018.00300)
Supplement: TABLE S1 — Gene expression (RNA-Seq) in the CeA, SH, and PL expressed as counts (reads) per million (CPM) – average data (N = 67, 71, and 54, respectively). [file Table_1.xlsx]

## Sheet: Table 1-CPM 3 Regions
			Supplemental Table 1
Gene Expression (RNA-Seq) in the CeA, SH and PL expressed a counts (reads) per million(reads) - average data (N= 67, 71 &54, respectively)											Genes shoiwng > 10-fold difference in expression compared to at least one region
Symbol	Average-CeA			Symbol	Average - SH			Symbol	Average - PL		High-CeA	Symbol	CEA cpm	PL cpm	SH cpm		Low-CeA	Symbol	CEA cpm	PL cpm	SH cpm		High-SH	Symbol	SH cpm	CEA cpm	PL cpm		Low-SH	Symbol	SH cpm	CEA cpm	PL cpm		High-PL	Symbol	PL cpm	CEA cpm	SH cpm		Low-PL	Symbol	PL cpm	CEA cpm	SH cpm
Ncdn	5925			Yam1	5696.48			Yam1	4710.6			6430628N08Rik	17.87	0.02	0.56			3110035E14Rik	40.78	754.37	30.91			1700003D09Rik	299.51	116.38	16.47			3110035E14Rik	30.91	40.78	754.37			3110035E14Rik	754.37	40.78	30.91			1700003D09Rik	16.47	116.38	299.51
Yam1	3312.36			AY036118	3772.07			Aldoa	3380.31			A830012C17Rik	155.98	2.28	123.43			9130024F11Rik	0.06	40.55	0.27			A830012C17Rik	123.43	155.98	2.28			6430628N08Rik	0.56	17.87	0.02			9130024F11Rik	40.55	0.06	0.27			6430628N08Rik	0.02	17.87	0.56
Cpe	2858.34			Ndrg4	3107.44			Calm1	3324.47			Adora2a	141.98	1.99	411.4			Adcyap1	1.52	53.39	0.45			Adam12	20.24	3.25	1.47			9130024F11Rik	0.27	0.06	40.55			Adcy1	660.57	66.33	56.95			A830012C17Rik	2.28	155.98	123.43
Eef1a1	2845.76			Cpe	2409.03			AY036118	3102.99			Ano2	39	0.39	11.18			Adra1d	0.72	15.11	0.46			Adamts19	10.35	1.09	0.15			Adcy1	56.95	66.33	660.57			Adcyap1	53.39	1.52	0.45			Adam12	1.47	3.25	20.24
Gnas	2800.11			Calm1	2391.62			Snap25	3052.43			Arhgap36	87.9	1.44	6.78			Aldh1a3	0.08	10.08	0.3			Adora2a	411.4	141.98	1.99			Adcyap1	0.45	1.52	53.39			Adra1b	19.81	2.83	0.79			Adamts19	0.15	1.09	10.35
Itm2c	2715.85			Aldoa	2285.69			Cpe	2648.7			Arhgap6	130.75	4.56	68.64			Arhgap15	1.51	15.73	0.48			Agbl2	13.73	2	0.94			Adra1b	0.79	2.83	19.81			Adra1d	15.11	0.72	0.46			Adora2a	1.99	141.98	411.4
Gm20721	2683.18			Penk	2202.35			Gnas	2350.44			AW551984	132.75	7.5	18.65			Arhgap25	1.92	42.66	2.17			Ankrd63	218.94	151.5	16.3			Adra1d	0.46	0.72	15.11			Aldh1a3	10.08	0.08	0.3			Agbl2	0.94	2	13.73
Aplp1	2560.4			Ckb	2088.05			Gm20721	2331.67			Baiap3	354.41	19.54	129.98			Bdnf	2.46	57.6	0.57			Ano2	11.18	39	0.39			Aldh1a3	0.3	0.08	10.08			Arhgap15	15.73	1.51	0.48			Ankrd63	16.3	151.5	218.94
Calm1	2499.87			Ppp3ca	2067.76			Psap	2279.88			Calcrl	31.54	2.45	8.92			Bhlhe22	1.6	30.97	1.1			Arhgap6	68.64	130.75	4.56			Arhgap15	0.48	1.51	15.73			Arhgap25	42.66	1.92	2.17			Ano2	0.39	39	11.18
Aldoa	2490.38			Aplp1	2042.91			Calm2	2252.81			Camk2d	555.92	122.51	50.88			Cck	32.17	730.4	6.66			C030048H21Rik	11.06	1.43	0.04			Arhgap25	2.17	1.92	42.66			Bdnf	57.6	2.46	0.57			Arhgap36	1.44	87.9	6.78
Psap	2319.16			Ppp1r1b	2038.21			Aplp1	2169.18			Cartpt	74.44	4.2	436.93			Chat	0.98	0.18	12.27			Carhsp1	174.28	45.51	15.04			Arhgap36	6.78	87.9	1.44			Bhlhe22	30.97	1.6	1.1			Arhgap6	4.56	130.75	68.64
AY036118	2208.13			Snhg11	2029.59			Syp	2009.21			Cd4	10.94	0.48	37.82			Chrd	3.99	42.19	7.74			Cartpt	436.93	74.44	4.2			Bdnf	0.57	2.46	57.6			Blnk	44.34	4.95	3.33			AW551984	7.5	132.75	18.65
Penk	2188.89			Apoe	2019.11			Atp1b1	1842.44			Cdca7	18.51	1.68	6.45			Chrna4	3.87	46.04	9.58			Cd4	37.82	10.94	0.48			Bhlhe22	1.1	1.6	30.97			C1ql3	97.88	13.33	3.54			Baiap3	19.54	354.41	129.98
Atp1a3	2129.06			Atp1a3	1951.82			Atp1a3	1830.52			Chodl	43	1.08	3.81			Chst8	0.85	12.91	1.29			Chat	12.27	0.98	0.18			Blnk	3.33	4.95	44.34			Car10	117.52	21.72	4.16			C030048H21Rik	0.04	1.43	11.06
Apoe	1933.2			Eef1a1	1855.34			Gpm6a	1820.09			Clic6	16.31	0.14	17			Col11a1	10.63	11.46	140.54			Chia1	23	15.15	2.15			C1ql3	3.54	13.33	97.88			Cbln2	48.31	8.17	1.36			Calcrl	2.45	31.54	8.92
Atp1b1	1865.86			Psap	1853.76			Snhg11	1791.75			Cnih3	132.06	88.79	8.11			Col22a1	0.54	11.02	0.79			Clic6	17	16.31	0.14			Camk2d	50.88	555.92	122.51			Ccdc3	16.42	1.7	0.71			Carhsp1	15.04	45.51	174.28
Calm2	1695.91			Cwc22	1826.75			Ndrg4	1791.19			Cpne2	169.96	16.88	72.7			Cplx3	0.78	30.56	0.45			Col11a1	140.54	10.63	11.46			Car10	4.16	21.72	117.52			Cck	730.4	32.17	6.66			Cartpt	4.2	74.44	436.93
Hsp90ab1	1684.44			Cst3	1824.72			Hsp90ab1	1747.73			Crabp1	53.34	0.53	10.68			Cpne9	1.32	41.68	1.34			Crabp1	10.68	53.34	0.53			Cbln2	1.36	8.17	48.31			Chrd	42.19	3.99	7.74			Cd4	0.48	10.94	37.82
Ndrg4	1679.39			Calm2	1773.67			Calm3	1746.45			Crh	35.75	7.66	1.16			Ctgf	2.41	80.08	2.59			Dchs2	10.79	14.39	0.64			Ccdc3	0.71	1.7	16.42			Chrm3	35.61	8.77	2.43			Cdca7	1.68	18.51	6.45
Cst3	1674.81			Atp5b	1708.24			Sparcl1	1731.49			Cyp26b1	213.58	1.58	2.75			Dkk3	33.06	582.73	92.49			Dlk1	100.8	136.72	0.76			Cck	6.66	32.17	730.4			Chrna4	46.04	3.87	9.58			Chat	0.18	0.98	12.27
Zwint	1618.71			Arpp21	1568.11			Fth1	1729.07			Dchs2	14.39	0.64	10.79			Dkkl1	0.77	45.87	0.39			Dlx6	49.84	73.54	4.97			Chodl	3.81	43	1.08			Chst8	12.91	0.85	1.29			Chia1	2.15	15.15	23
Pkm	1613.47			Itm2c	1525.94			App	1699.47			Ddc	156.03	5.02	29.01			Dpp4	0.98	10.15	0.81			Drd1a	212.7	11.65	20.75			Chrm3	2.43	8.77	35.61			Cnih3	88.79	132.06	8.11			Chodl	1.08	43	3.81
Eno2	1597.97			Lars2	1509.09			Lars2	1688.92			Dgkk	31.98	0.64	3.29			Drd1a	11.65	20.75	212.7			Drd2	98.37	34.25	0.82			Cnih3	8.11	132.06	88.79			Col22a1	11.02	0.54	0.79			Clic6	0.14	16.31	17
Uchl1	1541.48			Hsp90ab1	1503.6			Syt1	1686.25			Dlk1	136.72	0.76	100.8			Dsg1c	0.34	0.02	20.32			Dsg1c	20.32	0.34	0.02			Col22a1	0.79	0.54	11.02			Cplx3	30.56	0.78	0.45			Col11a1	11.46	10.63	140.54
Atp5b	1528.6			Atp1b1	1473.58			Camk2a	1681.84			Dlx6	73.54	4.97	49.84			Dtl	0.88	18.13	4.27			Ecel1	112.63	147.64	6.42			Cplx3	0.45	0.78	30.56			Cpne9	41.68	1.32	1.34			Cpne2	16.88	169.96	72.7
Arf3	1510.68			Actb	1454.55			Atp5b	1604.1			Dnah5	43.54	10.58	1.81			Emx1	0.42	15.87	0.17			Epha8	40.1	5.74	3.3			Cpne9	1.34	1.32	41.68			Ctgf	80.08	2.41	2.59			Crabp1	0.53	53.34	10.68
Map2	1501.8			Ddx5	1450.48			Slc17a7	1593.09			Dock10	414.1	20.83	58.99			Ephb6	22.46	317.42	52.4			Fam179a	39.39	5.53	1.4			Crh	1.16	35.75	7.66			Dkk3	582.73	33.06	92.49			Cyp26b1	1.58	213.58	2.75
Snhg11	1485.97			Hpca	1447.2			Uchl1	1532.25			Drd2	34.25	0.82	98.37			Fam19a1	3.79	39.33	0.89			Fam196b	13.7	8.44	0.66			Ctgf	2.59	2.41	80.08			Dkkl1	45.87	0.77	0.39			Dchs2	0.64	14.39	10.79
Slc1a2	1477.86			Pkm	1440.86			Pkm	1527.83			Ebf1	15.59	1.28	2.75			Fezf2	2.6	70.58	3.03			Foxp2	200.4	9.87	27.83			Cyp26b1	2.75	213.58	1.58			Dpp4	10.15	0.98	0.81			Ddc	5.02	156.03	29.01
Thra	1472.01			Gm13340	1428.65			Zwint	1516.82			Ecel1	147.64	6.42	112.63			Fhl2	4.72	85.85	9.39			Gm27031	195.79	145.92	9.6			Dkkl1	0.39	0.77	45.87			Dtl	18.13	0.88	4.27			Dgkk	0.64	31.98	3.29
Snap25	1464.17			Nsg2	1414.53			Tspan7	1485.94			Fndc9	50.51	3.67	31.79			Foxp2	9.87	27.83	200.4			Gng7	1072.51	339.95	49.71			Dnah5	1.81	43.54	10.58			Efcab6	29.23	4.07	2.28			Dlk1	0.76	136.72	100.8
Rplp1	1450.63			Snap25	1398.96			Slc1a2	1476.02			Gabre	11.03	0.34	0.7			Gm11549	0.43	34.92	0.31			Gpr149	41.03	2.23	0.53			Dpp4	0.81	0.98	10.15			Emx1	15.87	0.42	0.17			Dlx6	4.97	73.54	49.84
Hpcal4	1430.3			Pde1b	1333.27			Rtn3	1455.65			Gabrg1	218.8	18.94	46.18			Gm15270	0.44	10.35	0.33			Gpr6	131.13	12.52	0.57			Efcab6	2.28	4.07	29.23			Ephb6	317.42	22.46	52.4			Dock10	20.83	414.1	58.99
Tspan7	1407.64			Rplp1	1320.23			Clstn1	1445.29			Gabrq	28.49	1.59	1.28			Gm26776	1.42	14.26	0.64			Gpr88	1028.79	238.02	22.98			Emx1	0.17	0.42	15.87			Fam19a1	39.33	3.79	0.89			Drd1a	20.75	11.65	212.7
Calm3	1406.83			Phactr1	1300.6			Camk2n1	1412.45			Gm10710	10.89	0.42	3.96			Gpr149	2.23	0.53	41.03			Gulp1	40.57	11.9	3.02			Fam19a1	0.89	3.79	39.33			Fezf2	70.58	2.6	3.03			Drd2	0.82	34.25	98.37
Sparcl1	1370.8			Tspan7	1289.07			Sptan1	1370.44			Gm27031	145.92	9.6	195.79			Gpr6	12.52	0.57	131.13			Htr1d	11.57	6.68	0.31			Fezf2	3.03	2.6	70.58			Fhl2	85.85	4.72	9.39			Dsg1c	0.02	0.34	20.32
Fth1	1366.99			Fkbp1a	1287.37			Cst3	1357.23			Gpr101	68.48	0.53	9.31			Grp	0.75	51.34	0.34			Htr4	13.14	3.42	0.73			Frzb	2.28	4.95	32.72			Frzb	32.72	4.95	2.28			Ebf1	1.28	15.59	2.75
Syp	1363.16			Eno2	1270.62			Rtn1	1344.86			Gpr150	26.31	3.67	1.49			Hkdc1	0.82	26.74	0.87			Ido1	20.68	3.5	0.52			Gabre	0.7	11.03	0.34			Galnt9	159.37	30.9	12.13			Ecel1	6.42	147.64	112.63
Nsg2	1347.26			Rtn1	1265.25			Serinc1	1341.99			Gpr6	12.52	0.57	131.13			Igfn1	0.21	12.25	0.52			Isl1	40.32	8.89	0.04			Gabrq	1.28	28.49	1.59			Gm11549	34.92	0.43	0.31			Epha8	3.3	5.74	40.1
App	1343.75			Ncdn	1229.07			Cfl1	1331.21			Gpr88	238.02	22.98	1028.79			Islr	1.06	10.19	11.54			Islr	11.54	1.06	10.19			Galnt9	12.13	30.9	159.37			Gm15270	10.35	0.44	0.33			Fam179a	1.4	5.53	39.39
Rtn1	1308.86			Slc1a2	1206.36			Tmsb4x	1330.89			Ifi27l2a	13.58	0.5	0.33			Itga8	1.57	15.94	2.05			Kcna5	48.64	21.96	1.99			Gm11549	0.31	0.43	34.92			Gm26776	14.26	1.42	0.64			Fam196b	0.66	8.44	13.7
Gpm6a	1307.68			Gpi1	1183.3			Kif5a	1326.47			Kcna5	21.96	1.99	48.64			Lsp1	1.25	19.3	1.17			Kctd8	44.91	19.85	4.34			Gm15270	0.33	0.44	10.35			Gm26892	23.87	2.85	1.07			Fndc9	3.67	50.51	31.79
Gm13340	1294.5			Camk2b	1154.84			Olfm1	1322.5			Lrrc10b	25.57	1	114.78			Mas1	0.94	30.09	2.72			Lamb3	39.33	10.87	2.59			Gm26776	0.64	1.42	14.26			Gm28221	103.1	37.34	8.92			Gabre	0.34	11.03	0.7
Eef2	1287.18			Tac1	1137.11			Eno2	1312.93			Magel2	37.02	1.8	6.1			Mef2c	52.05	668.37	93.42			Lhx8	10.36	3.35	0.03			Gm26892	1.07	2.85	23.87			Gm2824	13.19	2.71	1.29			Gabrg1	18.94	218.8	46.18
Nnat	1259.53			Gpm6a	1136.42			Atp1a1	1309.79			Megf6	30.28	1.73	6.76			Mme	2.73	4.33	49.04			Lrrc10b	114.78	25.57	1			Gm28221	8.92	37.34	103.1			Grm2	78.47	8.41	5.94			Gabrq	1.59	28.49	1.28
Kif5a	1239.08			Tmsb4x	1135.28			Dnm1	1302.74			Nespas	11.69	0.26	0.54			Myh3	0.71	13.2	0.67			Mme	49.04	2.73	4.33			Gm2824	1.29	2.71	13.19			Grm8	34.54	16	2.15			Gm10710	0.42	10.89	3.96
Fkbp1a	1216.07			Atp5a1	1134.56			Apoe	1286.32			Ngb	126.8	6.07	3.47			Myl4	2.35	48.03	1.5			Nexn	43.01	7.68	1.43			Gpr150	1.49	26.31	3.67			Grp	51.34	0.75	0.34			Gm27031	9.6	145.92	195.79
Ppp3ca	1215.1			Chn1	1126.62			Eef1a1	1277.09			Nnat	1259.53	117.57	984.77			Nbl1	9.51	98.15	12.45			Nt5e	28.24	40.25	0.94			Grm2	5.94	8.41	78.47			Hkdc1	26.74	0.82	0.87			Gng7	49.71	339.95	1072.51
Hap1	1213.98			App	1122.75			Gpi1	1268.17			Npbwr1	11.85	0.84	0.87			Necab3	9.94	108.3	4.77			Ntn1	86.88	8.79	5.12			Grm8	2.15	16	34.54			Hs3st2	95.36	15.52	3.96			Gpr101	0.53	68.48	9.31
Slc22a17	1209.79			Trank1	1122.41			Vamp2	1241.68			Nr2f2	35.8	6.65	2.29			Neurod2	1.51	68.5	0.63			Ntrk1	22.84	0.65	0.03			Grp	0.34	0.75	51.34			Igfbp6	55.36	5.61	3.84			Gpr149	0.53	2.23	41.03
Gaa	1189.25			Eef2	1119.39			Gm13340	1220.54			Nt5e	40.25	0.94	28.24			Neurod6	2.68	147.44	1.05			Nts	56.02	230.97	1.4			Hkdc1	0.87	0.82	26.74			Igfn1	12.25	0.21	0.52			Gpr6	0.57	12.52	131.13
Maged1	1175.62			Arf3	1113.53			Ckb	1214.04			Nts	230.97	1.4	56.02			Npas1	1.31	18.37	0.66			Oprk1	84.99	27.97	6.85			Hs3st2	3.96	15.52	95.36			Itga8	15.94	1.57	2.05			Gpr88	22.98	238.02	1028.79
Rtn3	1160.58			Mdh1	1075.3			Chn1	1204.76			Ntsr1	49.85	20.5	1.03			Npr3	0.32	14.52	0.33			P2ry1	35.8	41.97	0.96			Ifi27l2a	0.33	13.58	0.5			Kcnc4	91.65	16.93	5.91			Gulp1	3.02	11.9	40.57
Ttc3	1158.05			Gng7	1072.51			Mdh1	1203.74			Oxtr	34.91	7.51	1.08			Nrn1	6.65	249.65	2.02			Pbx3	78.31	42.57	4.07			Igfbp6	3.84	5.61	55.36			Kcnk4	11.54	2.5	0.5			Htr1d	0.31	6.68	11.57
Atp5a1	1140.04			Fth1	1066.77			Ppp3ca	1201.57			P2ry1	41.97	0.96	35.8			Ntrk1	0.65	0.03	22.84			Pcp4l1	618.17	30.79	33.8			Igfn1	0.52	0.21	12.25			Lsp1	19.3	1.25	1.17			Htr4	0.73	3.42	13.14
Rpl4	1138.94			Calm3	1064.83			Ywhag	1171.7			Pbx3	42.57	4.07	78.31			Nxph3	1.1	77.61	2.73			Pde10a	754.11	101.54	56.07			Kcnc4	5.91	16.93	91.65			Mapk11	74.51	10.24	6.37			Ido1	0.52	3.5	20.68
Ahi1	1136.94			Rpl4	1040.31			Snrpn	1165.05			Pde7b	109.44	5.99	71.63			Ovol2	0.06	19.68	0.12			Pde1c	49.22	16.5	4.88			Kcnk4	0.5	2.5	11.54			Mas1	30.09	0.94	2.72			Ifi27l2a	0.5	13.58	0.33
Actb	1108.36			Gpr88	1028.79			Thra	1149.23			Pdyn	406.58	34.86	624.97			Pcp4l1	30.79	33.8	618.17			Pde7b	71.63	109.44	5.99			Lsp1	1.17	1.25	19.3			Mef2c	668.37	52.05	93.42			Isl1	0.04	8.89	40.32
Gabbr1	1094.83			Slc22a17	1020.22			Cwc22	1142.44			Peg10	322.2	13.47	150.45			Pdlim1	1.09	11.32	1.06			Pdyn	624.97	406.58	34.86			Mapk11	6.37	10.24	74.51			Mfsd4	55.36	10.47	4.8			Kcna5	1.99	21.96	48.64
Cfl1	1091.51			Adcy5	1013.78			Mir6236	1130.65			Penk	2188.89	36.92	2202.35			Prdm8	1.23	26.1	0.27			Peg10	150.45	322.2	13.47			Mas1	2.72	0.94	30.09			Mkx	28.14	5.23	1.8			Kctd8	4.34	19.85	44.91
Ckb	1085.46			Agap2	1009.66			Gm26723	1125.91			Plcxd2	65.17	45.86	6.47			Prss12	8.23	84.62	2.45			Penk	2202.35	2188.89	36.92			Mfsd4	4.8	10.47	55.36			Myh3	13.2	0.71	0.67			Lamb3	2.59	10.87	39.33
Rap1gap	1075.99			Thra	1003.82			Sptbn2	1118.31			Pnoc	35.06	11.25	1.76			Prss35	1.05	15.76	0.44			Pou3f4	25.76	6.71	1.91			Mkx	1.8	5.23	28.14			Myl4	48.03	2.35	1.5			Lhx8	0.03	3.35	10.36
Sptan1	1070.53			Cfl1	990.651			Hpcal4	1114.31			Prkcd	377.87	6.49	8.68			Psrc1	0.71	15.04	0.85			Ppp1r1b	2038.21	681.79	108.49			Myh3	0.67	0.71	13.2			Nbl1	98.15	9.51	12.45			Lrrc10b	1	25.57	114.78
Nrgn	1065.31			Hnrnpa2b1	989.495			Ppia	1101.18			Prlr	11.28	0.41	0.59			Pter	33.02	360.88	11.56			Prkch	86.57	25.99	3.31			Myl4	1.5	2.35	48.03			Ncald	906.72	300.06	82.11			Magel2	1.8	37.02	6.1
Clu	1063.74			Nnat	984.766			Eef2	1093.84			Qrfpr	15.54	1.24	1.1			Ptgs2	1.08	23.95	2.94			Ptprv	30.32	4.05	0.55			Ncald	82.11	300.06	906.72			Necab3	108.3	9.94	4.77			Megf6	1.73	30.28	6.76
Prkar1a	1062.6			Camkv	980.311			Nrgn	1093.8			Rerg	44.52	2.71	20.55			Pvalb	3.97	43.69	5.18			Rarb	222.49	13.22	6.34			Necab3	4.77	9.94	108.3			Neurod2	68.5	1.51	0.63			Mme	4.33	2.73	49.04
Mtch1	1060			Sepw1	975.094			Prnp	1092.7			Scgn	10.21	0.91	1.51			Rarb	13.22	6.34	222.49			Rasgrp2	165.45	32.62	14.98			Nespas	0.54	11.69	0.26			Neurod6	147.44	2.68	1.05			Nespas	0.26	11.69	0.54
Ddx5	1032.17			Syp	965.363			Arf3	1078.25			Scn5a	38.14	0.73	8.43			Rasl10a	3.34	49.34	7.33			Rbp1	104.33	9.91	3.22			Neurod2	0.63	1.51	68.5			Nov	163.03	20.33	2.99			Nexn	1.43	7.68	43.01
Ywhae	1027.95			Sptan1	948.276			Stmn3	1075.47			Scube3	22.67	1.91	39.36			Rbp1	9.91	3.22	104.33			Rgs9	710.27	91.98	21.55			Neurod6	1.05	2.68	147.44			Npas1	18.37	1.31	0.66			Ngb	6.07	126.8	3.47
Mdh1	1027.52			Camk2a	939.797			Itm2c	1064.84			Sertm1	67.94	26.29	3.22			Rspo2	2.03	46.23	0.46			Rreb1	281.44	111.03	26.42			Ngb	3.47	126.8	6.07			Npr3	14.52	0.32	0.33			Nnat	117.57	1259.53	984.77
Sepw1	1021.97			Gnas	935.189			Vsnl1	1059			Sh3rf2	10.47	0.09	25.56			Rtn4r	6.75	106.99	2.02			Scn4b	487.78	32.46	13.84			Nov	2.99	20.33	163.03			Nptx1	491.67	78.72	25.71			Npbwr1	0.84	11.85	0.87
Scg2	1009.81			Sf3b1	931.521			Ttc3	1041.22			Six3	40.38	0.02	82.04			Rtn4rl2	1.03	29.4	0.25			Scube3	39.36	22.67	1.91			Npas1	0.66	1.31	18.37			Nr4a2	20.15	2.8	1.18			Nt5e	0.94	40.25	28.24
Rpsa	1008.46			Gm20721	925.179			Actb	1006.58			Six3os1	11.43	0.01	29.31			Rxfp1	0.46	61.57	0.52			Serpina9	60.15	0.45	0.07			Npbwr1	0.87	11.85	0.84			Nrip3	188.84	24.95	18.08			Ntn1	5.12	8.79	86.88
Tmsb4x	1003.62			Rpsa	922.548			Ncdn	1000.73			Slc4a11	31.08	2.87	7.78			Satb2	0.11	72.54	0.7			Sh3rf2	25.56	10.47	0.09			Npr3	0.33	0.32	14.52			Nrn1	249.65	6.65	2.02			Ntrk1	0.03	0.65	22.84
Ywhag	988.368			Cplx2	921.312			Atp6v1b2	992.269			Sp9	54.7	3.57	30.06			Scn4b	32.46	13.84	487.78			Six3	82.04	40.38	0.02			Nptx1	25.71	78.72	491.67			Ntsr1	20.5	49.85	1.03			Nts	1.4	230.97	56.02
Agap2	985.37			Sez6	910.324			Mbp	979.554			Spata13	178.31	7.92	52.75			Scube1	2.81	66.34	1.96			Six3os1	29.31	11.43	0.01			Nr2f2	2.29	35.8	6.65			Nwd2	48.71	9.26	2.58			Oprk1	6.85	27.97	84.99
Serinc1	979.501			Ywhaz	902.365			Eef1a2	974.737			Spink8	41.1	2.75	12.32			Sel1l3	4.21	116.69	10.74			Slc17a8	13.09	0.32	3.31			Nr4a2	1.18	2.8	20.15			Nxph3	77.61	1.1	2.73			P2ry1	0.96	41.97	35.8
Lars2	977.73			Col6a1	901.608			Atp5a1	970.215			Sstr5	11.02	0.47	4.43			Serinc2	0.57	23.14	0.62			Slc35d3	53.07	2.59	0.66			Nrip3	18.08	24.95	188.84			Ovol2	19.68	0.06	0.12			Pbx3	4.07	42.57	78.31
Gpi1	975.249			Atp1a2	898.701			Dync1h1	958.736			Stk32b	13.7	1.14	2.01			Serpina9	0.45	0.07	60.15			Slc5a7	31.09	1.7	0.95			Nrn1	2.02	6.65	249.65			Pdlim1	11.32	1.09	1.06			Pcp4l1	33.8	30.79	618.17
Rpl3	974.339			Sparcl1	886.694			Klc1	945.347			Sv2c	14.68	0.73	8.32			Slc17a7	49.12	1593.09	14.68			Slco5a1	18.98	2.15	1.52			Ntsr1	1.03	49.85	20.5			Pdzrn3	28.75	4.18	1.81			Pde10a	56.07	101.54	754.11
Dlg4	970.126			Zwint	882.928			Kif1a	931.125			Syndig1l	35.71	3.14	101.7			Slc17a8	0.32	3.31	13.09			Spint1	12.7	3.24	0.11			Nwd2	2.58	9.26	48.71			Prdm8	26.1	1.23	0.27			Pde1c	4.88	16.5	49.22
Camk2a	967.127			Mir6236	880.706			Nsf	910.196			Tac2	391.3	30.72	46.32			Slc30a3	8.89	146.36	1.02			Stard5	108.89	4.57	6.36			Nxph3	2.73	1.1	77.61			Prss12	84.62	8.23	2.45			Pde7b	5.99	109.44	71.63
Gprasp1	953.742			Dlg4	877.543			Sepw1	906.88			Tacr1	37.63	2	21.16			Slc35d3	2.59	0.66	53.07			Stk32a	27.17	7.27	1.9			Ovol2	0.12	0.06	19.68			Prss35	15.76	1.05	0.44			Pdyn	34.86	406.58	624.97
Cplx2	947.302			Serinc1	875.381			Ncald	906.721			Tmem132c	13.95	5.27	0.5			Slc5a7	1.7	0.95	31.09			Stra6	55.67	0.46	3.77			Oxtr	1.08	34.91	7.51			Psrc1	15.04	0.71	0.85			Peg10	13.47	322.2	150.45
Prkacb	942.906			Gabbr1	874.098			Slc25a4	905.609			Tmem215	10.26	2.48	0.9			Smoc2	0.92	31.77	1.11			Strip2	386.05	164.12	19.09			Pdlim1	1.06	1.09	11.32			Pter	360.88	33.02	11.56			Penk	36.92	2188.89	2202.35
Kif1a	936.138			Map2	872.845			Thy1	896.515			Upk1b	52.14	0.36	0.31			Sowahb	0.95	22.77	2.88			Syndig1l	101.7	35.71	3.14			Pdzrn3	1.81	4.18	28.75			Ptgs2	23.95	1.08	2.94			Pou3f4	1.91	6.71	25.76
Cwc22	933.646			Gm26723	866.682			Gapdh	894.879			Vat1l	909.63	59.52	155.33			Stard5	4.57	6.36	108.89			Tac1	1137.11	96.32	37.46			Plcxd2	6.47	65.17	45.86			Ptprk	120.34	41.43	7.31			Ppp1r1b	108.49	681.79	2038.21
Pnmal2	917.812			Rps29	864.753			Pld3	890.694			Vipr2	21.77	0.65	0.65			Stra6	0.46	3.77	55.67			Tacr1	21.16	37.63	2			Pnoc	1.76	35.06	11.25			Pvalb	43.69	3.97	5.18			Prkcd	6.49	377.87	8.68
Eef1a2	910.922			Fbxl16	863.576			Rab3a	887.47			Zdhhc22	11.1	11.3	0.88			Syt17	1.72	30.79	1.26			Upb1	24.54	2.49	0.21			Prdm8	0.27	1.23	26.1			Rasl10a	49.34	3.34	7.33			Prkch	3.31	25.99	86.57
Vat1l	909.628			Rpl3	862.362			Ywhae	882.178			Zfhx3	56.42	2.62	10.96			Tac1	96.32	37.46	1137.11			Zfp503	34.96	25.83	0.57			Prkcd	8.68	377.87	6.49			RP23-415C3.5	24.91	4.33	1.73			Prlr	0.41	11.28	0.59
Itm2b	907.917			Ddn	856.945			Dclk1	868.036			Zfp503	25.83	0.57	34.96			Tbr1	2.17	179.6	1.95									Prlr	0.59	11.28	0.41			RP23-415C3.6	12.48	1.64	0.44			Ptprv	0.55	4.05	30.32
Gabarapl1	900.115			Meg3	850.479			Dlg4	867.154									Tex40	1.29	12.95	0.5									Prss12	2.45	8.23	84.62			Rprm	142.01	22.1	13.75			Qrfpr	1.24	15.54	1.1
Slc25a4	896.305			Syt1	844.853			Rplp1	855.798									Tmem178	5.26	131.66	6.83									Prss35	0.44	1.05	15.76			Rspo2	46.23	2.03	0.46			Rarb	6.34	13.22	222.49
Rps15	890.256			Ttc3	842.74			Gabbr1	852.614									Tnfrsf25	0.95	13.67	5.55									Psrc1	0.85	0.71	15.04			Rtn4r	106.99	6.75	2.02			Rasgrp2	14.98	32.62	165.45
Gad1	890.052			Ywhae	841.664			Hsp90aa1	851.675									Tnnc1	3.06	63.81	2.19									Pter	11.56	33.02	360.88			Rtn4rl2	29.4	1.03	0.25			Rbp1	3.22	9.91	104.33
Ppia	889.235			Ptms	839.406			Ddx5	851.584									Trabd2b	0.16	11.2	0.24									Ptprk	7.31	41.43	120.34			Rxfp1	61.57	0.46	0.52			Rerg	2.71	44.52	20.55
Ptprn	888.297			Gnal	837.634			Gm14703	847.89									Trbc2	0.18	61.83	0.43									Qrfpr	1.1	15.54	1.24			Satb1	137.16	16.51	11.83			Rgs9	21.55	91.98	710.27
Nsf	888.159			Uchl1	832.366			Map2	842.803									Trpv6	0.58	22.15	2.94									RP23-415C3.5	1.73	4.33	24.91			Satb2	72.54	0.11	0.7			Rreb1	26.42	111.03	281.44
Prnp	885.021			Pde2a	830.287			Ywhaz	837.273									Tshz3	2.01	33.05	6.39									RP23-415C3.6	0.44	1.64	12.48			Scube1	66.34	2.81	1.96			Scgn	0.91	10.21	1.51
Ndrg2	884.6			Atp1a1	820.957			Rpl4	836.472									Vip	4.44	107.33	3.86									Rprm	13.75	22.1	142.01			Sel1l3	116.69	4.21	10.74			Scn4b	13.84	32.46	487.78
Snrpn	883.878			Scg5	820.028			Tpi1	831.071									Wnt9a	0.57	21.68	0.5									Rspo2	0.46	2.03	46.23			Serinc2	23.14	0.57	0.62			Scn5a	0.73	38.14	8.43
Hsp90aa1	872.112			Vamp2	818.238			Stxbp1	830.781																					Rtn4r	2.02	6.75	106.99			Slc17a7	1593.09	49.12	14.68			Scube3	1.91	22.67	39.36
Mbp	871.45			Gapdh	815.597			Scg5	822.89																					Rtn4rl2	0.25	1.03	29.4			Slc26a4	16.33	1.68	0.26			Serpina9	0.07	0.45	60.15
Pea15a	861.845			Snrpn	809.578			Syn2	820.299																					Rxfp1	0.52	0.46	61.57			Slc30a3	146.36	8.89	1.02			Sh3rf2	0.09	10.47	25.56
Pcsk1n	857.555			Clstn1	807.954			Slc22a17	811.902																					Satb1	11.83	16.51	137.16			Smoc2	31.77	0.92	1.11			Six3	0.02	40.38	82.04
Camkv	857.451			Gaa	805.561			Tuba4a	811.091																					Satb2	0.7	0.11	72.54			Sowahb	22.77	0.95	2.88			Six3os1	0.01	11.43	29.31
Sst	851.945			Slc25a4	804.063			Enc1	810.569																					Scube1	1.96	2.81	66.34			Sstr3	31.6	5.44	2.78			Slc35d3	0.66	2.59	53.07
Hnrnpa2b1	845.862			Maged1	801.739			Prkar1a	808.956																					Sel1l3	10.74	4.21	116.69			Stx1a	499.51	77.64	48.88			Slc4a11	2.87	31.08	7.78
Ddn	843.551			Eef1a2	797.497			Ppp3r1	807.123																					Serinc2	0.62	0.57	23.14			Synj2	71.47	49	7			Slc5a7	0.95	1.7	31.09
Atp1a1	834.742			Ptprn	792.788			Tcf25	803.951																					Sertm1	3.22	67.94	26.29			Syt17	30.79	1.72	1.26			Slco5a1	1.52	2.15	18.98
Ubb	834.572			Gad1	791.619			Agap2	802.958																					Slc17a7	14.68	49.12	1593.09			Tbr1	179.6	2.17	1.95			Sp9	3.57	54.7	30.06
Dync1h1	831.172			Ubb	787.499			Tuba1a	800.313																					Slc26a4	0.26	1.68	16.33			Tex40	12.95	1.29	0.5			Spata13	7.92	178.31	52.75
Atp1a2	829.191			Ppia	780.058			Dgkz	789.678																					Slc30a3	1.02	8.89	146.36			Tmem178	131.66	5.26	6.83			Spink8	2.75	41.1	12.32
Syt1	819.342			Glul	773.968			Tubb5	787.889																					Smoc2	1.11	0.92	31.77			Tnfrsf25	13.67	0.95	5.55			Spint1	0.11	3.24	12.7
Clstn1	817.351			Sptbn2	770.158			Ppp2r1a	784.907																					Sstr3	2.78	5.44	31.6			Tnnc1	63.81	3.06	2.19			Sstr5	0.47	11.02	4.43
Ywhaz	817.231			Rps15	764.472			Prkar1b	784.09																					Stx1a	48.88	77.64	499.51			Trabd2b	11.2	0.16	0.24			Stard5	6.36	4.57	108.89
Dnm1	813.029			Hpcal4	761.93			Nsg2	774.501																					Synj2	7	49	71.47			Trbc2	61.83	0.18	0.43			Stk32a	1.9	7.27	27.17
Vamp2	807.278			Pde10a	754.11			Tubb4a	771.746																					Syt17	1.26	1.72	30.79			Trpc6	27.53	4.09	2.47			Stk32b	1.14	13.7	2.01
Ndn	805.971			Ppp2r1a	753.694			Nptn	771.204																					Tbr1	1.95	2.17	179.6			Trpv6	22.15	0.58	2.94			Stra6	3.77	0.46	55.67
Pgrmc1	805.024			Nptn	749.856			Cyfip2	764.011																					Tex40	0.5	1.29	12.95			Tshz3	33.05	2.01	6.39			Strip2	19.09	164.12	386.05
Atp6v1b2	803.636			Mtch1	749.223			Gabarapl1	761.689																					Tmem132c	0.5	13.95	5.27			Vip	107.33	4.44	3.86			Sv2c	0.73	14.68	8.32
Aldoc	802.274			Cx3cl1	746.886			Sept7	760.566																					Tmem178	6.83	5.26	131.66			Wnt4	39.01	11.91	2.16			Syndig1l	3.14	35.71	101.7
Gapdh	794.726			Ivns1abp	740.609			Camk2b	758.912																					Tmem215	0.9	10.26	2.48			Wnt9a	21.68	0.57	0.5			Tac1	37.46	96.32	1137.11
Ywhab	790.986			Gprasp1	739.049			Ywhab	758.739																					Tnnc1	2.19	3.06	63.81			Zbtb16	12.65	5.26	0.98			Tac2	30.72	391.3	46.32
Sqstm1	783.837			Dync1h1	738.161			3110035E14Rik	754.374																					Trabd2b	0.24	0.16	11.2			Zdhhc22	11.3	11.1	0.88			Tacr1	2	37.63	21.16
Scg5	783.398			Ndrg2	736.936			Glul	753.162																					Trbc2	0.43	0.18	61.83			Zfpm2	25.38	5.7	1.69			Upb1	0.21	2.49	24.54
Stmn3	779.25			Rtn3	728.331			Tecr	750.47																					Trpc6	2.47	4.09	27.53									Upk1b	0.36	52.14	0.31
Cltc	778.371			Cox4i1	727.731			Hnrnpa2b1	749.856																					Upk1b	0.31	52.14	0.36									Vat1l	59.52	909.63	155.33
Wfs1	775.933			Gria2	722.321			Sptbn1	747.136																					Vip	3.86	4.44	107.33									Vipr2	0.65	21.77	0.65
Chd3	771.597			Rap1gap	710.747			Rtn4	746.231																					Vipr2	0.65	21.77	0.65									Zfhx3	2.62	56.42	10.96
Ptk2b	771.42			Ptpn5	710.467			Rab6b	742.903																					Wnt4	2.16	11.91	39.01									Zfp503	0.57	25.83	34.96
Tmem130	771.077			Rgs9	710.272			Atp6v1e1	735.922																					Wnt9a	0.5	0.57	21.68
Rps29	762.345			Ogt	710.139			Snca	732.805																					Zbtb16	0.98	5.26	12.65
Sptbn2	755.976			Aldoc	708.083			Cck	730.395																					Zdhhc22	0.88	11.1	11.3
Map2k1	743.426			Clu	704.328			Atp9a	726.581																					Zfpm2	1.69	5.7	25.38
Gm26723	741.078			Rbm39	695.121			Apbb1	723.532
Ppp2r1a	740.933			Itm2b	680.716			Tubb2a	721.765
Faim2	736.044			Rian	680.472			Cx3cl1	712.815
Sptbn1	726.582			Klc1	678.404			Ptprn	711.787
Rps12	717.678			Tsc22d1	672.863			Cltc	711.054
Psd	716.483			Slc25a3	670.118			Faim2	709.739
Thy1	712.073			Gpm6b	667.643			Ywhah	704.572
Rab3a	698.186			Rpl17	665.237			Gnb1	701.206
Pld3	697.787			Rps12	663.094			Itm2b	694.962
Glul	694.472			Hnrnph1	661.752			Gpm6b	680.332
Stxbp1	694.02			Dynll2	656.06			Rps15	676.426
Klc1	691.72			Sptbn1	653.674			Ldha	674.181
Aco2	689.636			Map2k1	648.405			Rab6a	670.387
Tpi1	685.497			Ngef	643.969			Mef2c	668.374
Fam115a	683.603			Macf1	638.102			Sqstm1	667.133
Dynll2	682.417			Prkar1a	634.996			Mtch1	666.012
Ppp1r1b	681.786			Rab3a	633.954			Stmn2	661.682
Gdi1	681.702			Psd	629.376			Adcy1	660.573
Fbxl16	658.635			Tpt1	629.351			Ubb	657.764
Tpt1	651.593			Pdyn	624.969			Ddn	655.139
Wdr6	650.267			Celf4	623.642			Ap2m1	652.664
Rpl17	647.734			Ppp3r1	623.276			Ndrg3	652.527
Ptms	643.799			Baiap2	622.499			Nme7	650.915
Atp6ap2	641.967			Gad2	621.079			Clu	647.278
Prkar1b	639.909			Pcp4l1	618.171			Syt11	645.206
Mapk1	632.089			Dnm1	617.793			Atp1a2	645.049
Tecr	631.934			Rpl13a	615.43			Aldoc	644.789
Tagln3	631.472			Matr3	613.562			Fkbp1a	642.063
Rpl8	630.267			Mycbp2	611.239			Pfkp	640.872
Tcf25	626.022			Prnp	611.172			Celf4	639.744
Atp6v1e1	624.812			Ldhb	610.971			Kif5c	639.452
Plp1	623.057			Gabarapl1	610.939			Maged1	638.037
Tubb2a	617.959			Ndufa4	609.929			Gm23935	635.618
Map1a	615.712			Aes	607.895			Cplx2	635.405
Gda	615.661			Aco2	605.587			Nsmf	634.693
Gad2	613.863			Ppp1r9b	604.173			Ptms	629.924
Rtn4	613.38			Hap1	604.143			Camkv	627.412
Sf3b1	611.974			Rrp1	603.916			Cox4i1	623.743
Gria1	611.345			Rtn4	603.17			Map1b	623.331
Matr3	608.664			Nsg1	600.041			Nell2	620.139
Syt11	607.403			Ptk2b	596.529			Kif1b	612.288
Gria2	607.114			Nsf	594.427			Ctsb	612.07
Rps24	604.848			Rpl8	594.238			Syn1	611.08
Ppp1r9b	599.963			Atp9a	591.397			Pfn2	610.337
Pja2	599.389			Tecr	589.21			Tpt1	609.552
Calr	596.417			Dclk1	584.877			Gdi1	609.026
Mir6236	594.937			Sod1	584.019			Pde2a	608.204
Aplp2	594.706			Rps27	582.838			Eif4g2	606.543
Nptn	593.819			Scg2	582.694			Ndrg2	603.46
Chn1	592.711			Mapk1	582.393			Pfkm	602.026
Atp9a	592.571			Calr	580.817			Sv2b	599.67
Rpl13a	590.979			Eif1	580.567			Fbxl16	599.045
Ctsb	584.666			Gria1	580.19			Calr	597.993
Aes	583.522			Mt3	580.171			Gria2	597.772
Rrp1	583.458			Pnmal2	579.482			Eno1	595.814
Rps14	581.373			Rps14	578.07			Atp2a2	589.308
Sdha	579.123			Ttyh1	569.805			Pea15a	588.945
Pfkm	578.233			Rps21	569.189			Aes	587.145
Syt5	577.676			Vdac1	568.785			Bsg	586.14
Nsg1	576.441			Ckmt1	568.782			Atp6v1g2	584.686
Ap1s1	573.995			Atp6v1b2	568.34			Sult4a1	583.976
Nap1l5	572.47			Tpi1	565.14			Dkk3	582.728
Ppp3r1	572.454			Spock2	564.906			Pak1	581.746
Rps21	568.741			Kif1a	555.859			Gprasp1	581.027
Syn2	568.086			Cltc	553.532			Rpsa	580.155
Tro	567.522			Son	550.256			Plp1	574.502
Ly6h	566.053			Eif4g2	549.538			Map1a	574.408
Gm14703	562.773			Car11	548.68			Sf3b1	574.069
6330403K07Rik	562.518			Stmn3	545.25			Trank1	571.533
Gap43	560.223			Rps23	544.435			Atp6v1a	570.649
Spock2	560.019			Bsg	543.729			Aco2	570.466
Grin1	558.888			Atp5g3	540.882			Matr3	566.35
Bsg	557.42			Pcsk1n	538.652			Clip3	564.932
Camk2d	555.917			Rpl14	537.766			Napb	562.809
Peg3	555.253			Mbp	535.98			Ppp2r2c	561.918
Vsnl1	552.642			Nme7	535.063			Rps29	561.246
Rpl19	552.119			Rps27a	534.069			Slc25a3	559.916
Tuba1a	551.783			Hsp90aa1	533.455			Nckap1	558.573
Vdac1	548.606			Pfkm	532.209			Clstn3	557.145
Tubb5	547.624			Mdh2	531.474			Vdac1	556.71
Cyfip2	547.526			Mlf2	530.684			Hpca	552.811
Rps4x	545.483			Sqstm1	525.054			Slc6a17	552.035
Ctnnb1	545.293			Ywhag	525.014			Ndufa4	551.814
Rbm39	545.257			Thy1	523.979			Kifc2	551.421
Cox4i1	544.844			Grina	523.539			Tubb3	549.338
Rian	541.673			Crym	523.48			Psd	548.621
Dclk1	540.468			Rps4x	522.584			Dynll2	547.469
Skp1a	539.737			Ywhab	522.473			Gnao1	547.349
Gnao1	539.26			Nap1l1	518.345			Mlf2	546.808
Impact	537.082			Gnao1	517.207			Aplp2	546.739
Rpl14	537.06			Rpl9	514.117			Rrp1	544.213
Rps27	536.598			Ddx17	514.021			Ids	543.28
Nme7	536.294			Tef	513.455			Sirpa	540.648
Akr1a1	534.82			Camk2n1	511.866			Ctnnb1	538.691
Ldhb	534.492			Rasl10b	510.5			Ppp1r9b	538.425
Rpl9	533.233			Rnf112	508.897			Ndfip1	536.288
Pfn2	533.224			Kcnip2	507.605			Ckmt1	534.328
Kif5c	532.125			Ahi1	507.587			Syngr1	533.68
Macf1	531.21			Rps24	506.58			Sept5	533.506
Rps7	531.104			Lrp1	505.837			Pi4ka	533.183
Ogt	527.428			Abat	504.863			Mapk1	532.561
Nedd4	527.157			Hsph1	504.825			Chd3	527.207
Sod1	526.13			Rpl19	504.371			Snap91	527.058
Gnb1	525.669			Atp2a2	503.617			Mycbp2	524.911
Bai2	525.154			Atp6v1e1	497.724			Prkacb	523.918
Gpm6b	524.715			Celf2	497.034			Tmem132a	523.648
Eif4g2	522.48			Syt5	496.797			Pcsk2	521.576
Cx3cl1	521.142			Prkacb	495.891			Rgs4	520.591
Pde2a	519.167			Clk1	494.805			Akr1a1	520.102
Ap2m1	514.111			Dync1i2	493.691			N28178	519.149
Mdh2	508.681			Rpl11	490.861			Mllt11	518.064
Tsc22d1	507.684			Gdi1	490.194			Rpl17	516.886
Mlf2	505.328			Fau	489.797			Pja2	514.398
Abr	504.826			Skp1a	488.673			Skp1a	513.865
Ap2b1	503.942			Scn4b	487.775			Tppp	512.917
Arf1	502.731			Snca	483.883			Sdha	512.678
Ndufa4	502.555			Chd3	482.08			Rpl3	508.691
Slc25a3	502.27			Ewsr1	481.847			Basp1	508.534
Hspa5	501.527			Ctnnb1	480.304			Spock2	507.95
Apbb1	497.073			Ubr5	478.686			Sept3	502.51
Zcchc12	496.628			Rsrp1	477.529			Mdh2	501.344
Rps23	495.913			Gnb1	477.201			Rpl8	500.999
Rps17	495.624			Cacna1e	476.661			Snap47	500.832
Celf4	495.078			Tcf25	476.324			Stx1a	499.507
Hpca	494.97			Cdk17	472.553			Arpp21	497.74
Dctn1	494.523			Gm23935	472.02			Sncb	495.137
Hnrnpk	493.932			Atp5h	470.094			Sv2a	494.078
Rpl37	487.389			Tuba1a	468.865			Ttyh1	493.303
Ids	486.723			Elmod1	468.862			Nptx1	491.674
Rpl11	483.745			Map1a	468.72			Rasgrp1	489.177
Mycbp2	480.65			Atp5c1	465.103			Dctn2	488.647
Dos	477.937			Inf2	462.555			Tagln3	487.835
Hsp90b1	477.914			Peg3	459.821			Ensa	487.66
Ttyh1	477.466			Fam115a	457.744			Bai2	487.495
Pnck	476.086			Rps7	456.398			Itpr1	487.099
Ghitm	475.997			Ctsb	456.293			Abr	486.889
Fau	472.376			Atp2b1	453.443			Rsrp1	486.688
Ldha	471.573			Syt11	452.611			Lphn1	485.501
Ntrk2	471.525			Hnrnpk	451.97			Scamp5	484.22
Rps27a	469.703			Mprip	451.794			Pafah1b1	482.374
Adcy5	467.768			Rpl37	451.61			Hsph1	481.086
Clstn3	466.534			Rps17	451.254			R3hdm1	480.657
Cds2	466.463			Tubb5	451.176			Gas7	476.886
Timp2	465.366			Jph4	447.769			Hk1	475.223
Atp6v1a	463.005			Bzrap1	446.051			Atp6v0e2	474.826
Grina	461.054			Sdha	445			Ldhb	473.344
Uqcrc2	460.65			Mapk8ip1	444.163			Atp2b1	473.242
Galnt16	459.905			Arf1	444.049			Cox8a	472.907
Ckmt1	459.372			Hspa5	441.409			Rundc3a	471.481
Camk2b	458.563			Gnb2	440.69			Atp6ap1	470.332
Canx	457.853			Ptprs	440.343			Rian	467.712
Tuba4a	456.526			Faim2	439.052			Phyhip	465.602
Enc1	454.256			Slc6a1	438.281			Rps14	464.221
Rps5	453.825			Phyhip	437.528			Arpp19	461.544
Atp5g3	453.626			Cartpt	436.933			Tsc22d1	461.099
Ndfip1	452.981			Slc12a5	436.145			Nrsn1	460.934
Ndrg3	452.748			Atp2b2	435.725			Ank2	458.388
Eef1g	452.371			Gm13341	433.909			Mapk8ip3	456.695
Slc1a3	450.182			Ghitm	433.24			Grina	454.532
Saraf	449.088			Ppp1ca	433.004			Ptprs	453.433
Rpl32	448.229			Plp1	431.746			Fam131a	451.724
Gnal	446.855			Abr	430.722			Atp6ap2	450.19
Mapk8ip3	446.011			Pgrmc1	427.966			Tmem30a	449.783
Sv2a	445.003			Alcam	427.307			Ogt	449.708
Hnrnph1	442.328			Fkbp8	427.199			Osbpl1a	448.913
Slc12a5	442.052			Rnf187	427.173			Reep5	448.61
Eif4a2	440.307			Pea15a	426.829			Grin1	448.279
Hsph1	439.671			Rps5	426.191			Arf1	447.964
Tspyl4	439.608			Rbm5	423.893			Rph3a	446.322
Rps3a1	438.654			Bai1	423.486			Sh3gl2	444.799
Naca	437.644			Akr1a1	422.696			Pcsk1n	444.656
Nisch	437.547			Kifc2	422.503			Stmn1	444.438
Caly	434.749			Rpl23	421.089			Atp6v0b	443.078
Rpl6	434.616			Gm14703	420.579			Zfp365	441.951
Ociad1	433.261			Rab6b	419.878			Atp5g3	438.631
Rab6b	431.724			Kif5a	419.781			Ngef	437.933
Atp6v1g2	431.23			Nisch	418.739			Chgb	437.767
Snap47	430.362			Pld3	417.593			Rps24	437.283
Rpl23	429.329			Ppp2r2c	417.465			Uba1	436.605
Ncs1	428.545			Atp5o	415.945			Macf1	436.439
Pafah1b1	427.554			Rasgrp1	415.9			Ahi1	436.389
Uba1	427.51			Pja2	414.929			Lmo4	435.901
Rnf187	427.052			Plk2	414.616			Gls	435.895
Atp6v1d	426.817			Ly6h	414.424			Myl6	434.615
Fez1	425.554			Copg1	413.931			Sept8	434.527
Arpp21	423.764			Syn2	412.278			Atp6v0a1	433.473
Kifc2	423.722			Ap1s1	412.241			Acot7	433.168
Nap1l1	422.961			Canx	411.996			Atp6v1c1	432.691
Eif5a	422.771			Arpp19	411.977			Mapk10	432.674
Lphn1	420.53			Arhgef9	411.894			Cdc42	432.672
Copg1	419.884			R3hdm1	411.547			Gpx4	430.164
Atp5c1	419.118			Adora2a	411.398			Atxn10	429.877
Arpc1a	415.694			Naca	410.664			Dctn1	429.101
Sept7	414.126			Gas7	410.623			Map2k1	428.694
Dock10	414.102			Arpc1a	410.379			Efhd2	425.456
Rpl41	412.462			Pcbp2	410.269			Uqcrc2	423.542
Ensa	412.136			Nedd4	408.511			Prkcg	423.36
Pdia3	411.898			Bai2	406.214			Stx1b	423.005
Phyhip	410.951			Fez1	405.875			Rpl13a	421.842
Bex2	409.766			Pfn2	405.458			Ghitm	421.444
Atp5o	409.315			Rpl32	404.875			Mt3	421.247
Atp6ap1	408.168			Kcnq2	404.656			Impact	420.344
Abat	406.846			Cnbp	404.613			Fkbp8	419.67
Pdyn	406.584			Rasgrf1	404.196			Eif4a2	419.163
Tmem30a	404.818			Slc1a3	402.908			1700020I14Rik	419.083
Fkbp8	404.479			Uqcrh	401.696			Mapk8ip1	416.195
Cox8a	404.055			Itpr1	401.46			Hsp90b1	415.666
Ctsd	404.05			Cox8a	400.901			Egr1	414.746
Rab6a	403.7			Gucy1a3	400.716			Hnrnpk	414.241
Ank2	402.69			Lphn1	400.466			Rnf187	413.5
Kif1b	402.583			Epb4.1l1	399.642			Pitpna	412.621
Atp2a2	402.488			Pi4ka	397.345			Myo5a	412.593
Baiap2	401.141			Uqcrc2	397.311			Ctxn1	411.836
Snca	400.54			C2cd2l	397.103			Hspa5	411.615
Prepl	399.232			Uba1	396.066			Slc12a5	409.93
Npm1	398.675			Huwe1	395.984			Atp5o	409.359
Tomm20	398.254			Ap2m1	395.763			Ptk2b	408.731
Hsbp1	398.054			Clasp2	395.53			Stmn4	408.547
Atp5h	397.465			Atp5f1	395.241			Pgrmc1	408.368
Eef1b2	395.984			Atp6v1d	395.196			Atp5h	406.273
Atp5f1	395.766			Matk	395.06			Syt5	405.461
Ywhah	395.705			Ids	394.648			Rasgrf1	404.546
Mllt11	395.21			Uqcrc1	394.576			Mapt	404.321
Rasgrf1	392.627			Bex2	394.051			Meg3	404.092
Uqcrc1	392.162			Atp6v0a1	393.508			Hsbp1	403.761
Nckap1	391.647			Eif4a2	393.14			Stk25	403.706
Icam5	391.552			Ctxn1	391.997			Psd3	403.43
Tac2	391.3			Prdx2	391.832			Ap2b1	401.685
Prdx2	389.779			Eno1	391.75			Dmtn	401.589
Cdc42	386.524			Rps11	391.056			Rpl19	399.966
Ctxn1	385.26			Aplp2	390.88			Dynll1	399.759
Rgs4	384.814			Dctn1	390.789			Ntrk2	399.543
Tmx4	382.737			Eef1g	390.732			Nap1l5	399.525
Myl6	381.918			Abcc5	389.7			Serpini1	399.444
Rpl37a	381.671			Rpl26	389.315			Bai1	398.831
Cmip	381.563			Prkar1b	388.596			Eif5a	397.761
G3bp2	381.045			Slc4a3	387.453			Pfkl	397.437
Pi4ka	380.144			Psip1	386.47			Prkcb	397.131
Map1b	380.051			Strip2	386.052			Hnrnph1	396.999
Mapk8ip1	379.943			Cttnbp2	385.174			Phactr1	396.94
Camk2n1	379.845			Tspan3	384.882			Canx	396.92
Cox6a1	379.333			Ywhah	383.425			Tspyl4	395.895
Pfkp	378.893			Rpl41	382.413			Epn1	395.849
Rps25	378.625			Kif5c	381.666			Sub1	395.298
Eif1	378.336			Anapc5	380.115			Rps12	394.571
Rpl26	378.208			Rps9	378.489			Atp5c1	394.437
Clip3	377.913			Ppp1r2	378.326			Atp6v1d	394.4
Prkcd	377.873			Dnajc7	378.31			Ppp3cb	394.29
Atxn10	376.574			Etnk1	378.044			Gde1	393.966
Tspan3	376.32			Srsf11	377.727			Cox6b1	393.922
Rps11	376.171			St8sia3	377.535			Uqcrc1	393.74
Eif4h	376.037			Hsp90b1	377.084			Actr1b	393.322
Cacna1e	375.616			Srsf5	377.026			Atp5f1	391.438
Kcnq2	371.479			Cox6a1	377.016			Dlgap1	391.139
Tubb3	371.166			Ndufs2	376.9			Ddx17	388.904
Atp6v0a1	370.734			Rpl7	376.248			Wbp2	387.92
Ppp2r2c	369.665			Clstn3	375.42			Rbm39	387.743
Rpl21	369.333			Rps25	373.804			Rnf14	387.732
Sult4a1	368.351			Ndn	373.725			Rpl9	387.24
Cd81	368.258			Ncs1	373.443			Sod1	385.523
Celf2	368.213			Cacna2d3	373.202			Rps4x	384.462
Rsrp1	367.447			Ppp1cb	373.122			Dpysl2	383.906
Pink1	366.299			Kif1b	372.592			Tspan3	383.528
Gm13341	366			Marcks	372.312			Kalrn	382.976
Sub1	365.777			Rpl37a	372.208			Arl6ip1	382.928
Pcbp2	365.101			Rpl6	371.741			Rpl14	382.46
Usp22	364.962			Rpl31	370.991			Rps21	381.5
Prrc2b	364.771			Nckap1	370.232			Tusc3	380.092
Pja1	364.208			Cox6b1	368.301			Nisch	379.775
Phactr1	363.847			Atp6v1g2	367.644			Ociad1	378.933
Stx1b	363.781			Myl6	366.721			Unc13a	378.276
Ppp1cb	363.27			Zmym3	365.461			Gap43	377.722
Ptpn5	362.875			Tomm70a	365.125			Pgm2l1	377.497
Lrp1	362.306			Myo5a	365.088			Add1	374.05
Ddx17	362.24			Rps3a1	364.717			Ctsd	374.017
Rpn2	360.364			Pfkp	364.539			Tmod2	372.987
Prpf19	359.547			Tusc3	363.595			Mical2	371.896
Atp6v0e2	359.532			Ppp1r9a	363.102			Got1	371.031
Arhgef9	359.072			Ldha	363.05			Ndn	370.946
Son	358.222			Ryr3	361.641			Prkce	370.595
Scamp5	357.985			Cds2	359.539			Kifap3	370.547
Slc6a17	357.967			Zcchc12	359.406			Epb4.1l1	370.531
Eif4g1	356.608			Syne1	359.277			Cplx1	369.852
Prkce	356.311			Grin1	358.986			Prdx2	369.565
Rangap1	355.919			Stxbp1	358.976			Fxyd6	368.991
Huwe1	355.687			Gucy1b3	358.893			Pink1	368.029
Napb	355.382			Cplx1	358.773			Copg1	367.954
Psip1	355.284			Cdc42	358.073			Cds2	367.444
Uqcrh	355.276			Nrsn1	358.064			Gaa	366.342
Sirpa	355.242			Bcr	356.628			Serinc3	365.611
Pak1	354.959			Atp6v0b	356.605			Rnf112	365.334
Baiap3	354.411			Ndufb9	356.489			Diras2	364.991
Cct8	353.969			Fam49a	355.814			Pdia3	364.933
Svop	353.598			Caly	355.137			Baiap2	364.848
Usp11	353.594			Hnrnpl	352.38			Rps7	364.844
Rab2a	353.496			Dbn1	352.181			Cox6a1	364.605
Got1	353.394			Sub1	352.095			Fau	364.218
Cox6b1	353.232			Ociad1	351.119			Cd81	363.985
Elmod1	352.549			Sv2a	350.867			Brsk1	362.25
Gabrb3	352.504			2010300C02Rik	350.516			Rap1gds1	361.5
Zfr	352.366			Necab2	350.23			Pter	360.884
Cct7	351.879			Sult4a1	350.001			Pcbp2	359.971
Epb4.1l1	350.566			Tmem30a	348.913			Hmgcs1	359.768
Hdac11	350.253			Hnrnpc	348.574			Atp6v0d1	357.942
Sez6	350.19			Oxct1	348.238			Son	357.682
Snap91	349.626			Mapk8ip3	347.91			Tmem59l	357.341
Rac1	349.334			Ank2	347.723			Rps27	357.122
Rpl7	349.26			Ndrg3	346.383			Nap1l1	356.998
Ptprs	348.458			Meis2	345.389			Atp2b2	356.752
Mt3	348.26			Chchd10	344.673			Tyro3	356.601
Cnbp	347.959			Dgkz	343.982			Map4	356.065
Olfm1	347.827			Reep5	343.81			Saraf	355.976
Eno1	346.952			Inpp5f	343.074			Synj1	355.836
Nrxn2	346.205			Apbb1	342.046			Gria1	355.654
Dctn2	346.028			Ubr4	341.387			Abhd12	355.214
Ngfrap1	345.738			Gtf2i	340.982			Sst	355.006
Resp18	345.72			Prrc2a	340.677			Ncs1	354.5
Jph4	344.965			Ndufa13	340.398			Khdrbs3	354.186
Cap1	344.751			Mllt11	339.786			Fam115a	354.067
Sept5	344.63			Dpysl2	339.714			Sez6l2	352.817
Cspg5	344.143			Tuba4a	339.518			Cspg5	352.527
Dync1i2	343.763			Eif4h	339.4			Sorl1	352.44
Etnk1	343.524			Ank3	338.729			Rps27a	351.891
2900011O08Rik	343.397			Sirpa	338.161			Dync1i2	351.761
Prrc2a	343.187			Eif5a	338.148			Scg3	351.336
Acot7	342.964			Ensa	337.661			Celf2	350.973
Sdf4	340.775			Mink1	336.264			Fez1	349.875
Atp6v1c1	340.299			Tubb2a	335.828			Ndufs2	349.72
Tef	340.139			Scn2b	335.178			Etnk1	347.216
Gng7	339.948			Dctn2	335.088			Eif1	347.18
Clasp2	339.831			Impact	334.553			Svop	347.002
Pde1b	339.667			Cd81	334.479			Rps23	346.877
Reep5	339.054			Atp6ap1	333.342			Gng3	345.965
Ddb1	337.919			Cyfip2	333.33			Bsn	345.874
Rnf14	337.656			Cox5a	333.229			Gabra1	345.423
Dmtn	337.449			Srrm2	332.833			Aak1	345.255
Ndufs2	337.269			Rbfox1	332.513			Gm13341	345.226
Rnd2	336.703			Rpl18a	331.728			Rpl11	343.941
Sec14l1	336.692			Hsbp1	330.983			Cntn1	343.624
Arl6ip1	336.641			Ssbp4	330.188			Ppp1cb	343.423
Mapk8ip2	335.745			Atp5j	329.349			Oxct1	343.12
Hnrnpc	335.696			Unc13a	329.271			Rapgef4	342.405
Vcp	335.219			Tro	329.216			Ap2a1	341.867
Tusc3	334.928			Sh3glb2	328.33			Rpl23	341.691
Kidins220	334.645			Snrnp70	327.905			Ewsr1	341.357
Dpp6	334.11			Mt1	327.712			Kcnq2	341.165
Pfkl	333.826			Cspg5	326.722			Uqcrh	338.677
Mink1	333.825			6330403K07Rik	326.237			Homer1	338.473
Syn1	333.656			Cpne5	326.105			Zmat2	338.121
Disp2	332.584			Tcp1	325.596			Nrcam	337.146
Arpc2	331.759			Gap43	325.29			Anapc5	336.931
Trank1	331.565			Wfs1	323.565			Rpl37	336.742
Srp14	331.542			Gpx4	323.102			Clasp2	336.614
Cct5	330.475			Ppp3cb	323.005			Rps17	336.105
Rpl18a	330.397			Map1b	322.975			Nedd4	335.43
Rpl31	329.871			Rasd2	322.628			Eif4h	334.843
Wbp2	329.86			N28178	322.043			Cacnb3	334.697
Kifap3	329.633			Slc20a1	322.016			Slc8a2	334.523
Klhl2	328.485			Atp5j2	321.593			Sort1	334.115
Gtf2i	328.001			Tubb3	321.407			Lrp1	334.028
Sez6l2	327.77			Ntrk2	321.337			Tubb4b	333.946
Gpx4	327.638			Stk25	321.095			Psmd2	332.618
Arhgdia	327.336			Rplp2	320.957			Pip5k1c	332.475
Serinc3	327.254			Ndfip1	320.065			Slc15a3	330.382
Cdip1	327.165			Pcsk2	319.944			Fbxw7	330.04
Abhd12	326.042			Shisa7	319.568			Cct8	329.67
Cct2	325.999			Psmb1	319.375			Idh3b	327.788
Glud1	325.986			Tomm20	318.396			2900011O08Rik	326.452
Rps8	325.065			Grm5	318.376			Gtf2i	326.256
Chga	324.113			Mgea5	318.364			Rpl32	325.907
Rasgef1a	323.811			Got1	318.036			Psmc5	325.034
Gm23935	323.637			Rps8	317.996			Ppp1ca	323.863
Tubb4a	322.707			Pafah1b1	317.56			Syne1	323.759
Atp6v0b	322.572			Rps19	317.352			Zfr	323.676
Peg10	322.204			Icam5	317.201			Rab2a	323.519
Uhmk1	321.673			2610507B11Rik	317.152			Cox7a2	323.093
Mprip	321.462			Prrc2b	316.754			Sh3glb2	322.343
Idh3b	321.185			Rasgef1a	316.589			Myl12b	321.3
Psmb1	320.461			Fus	316.41			Mtpn	321.158
Morf4l1	320.192			Pdia3	315.773			Gda	320.386
Ubr4	320.145			Eef1b2	315.636			Oxr1	319.464
Anapc5	319.328			Celf5	315.561			Cacna1e	319.282
Luc7l3	318.378			Gm13339	315.081			Scn1b	318.829
Ahcyl1	318.35			Kcnt1	314.883			Arhgdia	318.58
Ewsr1	318.316			Ablim2	314.009			Ephb6	317.415
Psmd2	317.896			Cox6c	312.683			Nefl	316.986
Slc6a1	317.861			Bcan	312.17			Huwe1	316.527
Rps6	317.798			Cox7a2	311.778			Bin1	316.511
Tcp1	317.447			Atxn10	311.778			Vcp	316.169
Ndufb9	317.324			Ap2b1	311.718			Cct7	314.77
Ngef	315.943			Nxf1	311.365			Wsb2	313.825
Epn1	315.925			Idh3b	311.146			Naca	313.025
Dnajc5	314.622			4932438A13Rik	310.966			Pgk1	312.548
Clk1	314.126			Hnrnpdl	310.804			Mpped1	312.298
Rps19	313.384			Atp6v0e2	310.772			Prrc2b	311.341
Ppp3cb	313.245			Atp5k	310.252			Chd5	311.333
Sept3	312.487			Tmbim6	309.736			Ap2s1	311.056
Add1	312.27			Tspyl4	309.518			Ndufb9	310.849
Tmem59	311.984			Tmem130	309.275			Herc1	310.132
Tmod2	311.404			Slc25a5	309.055			Ap2a2	310.107
Chgb	311.176			Stx1b	308.642			Eif4g1	310.093
Ptpra	310.418			Rab15	307.988			Arhgef9	309.858
Nsmf	310.046			Atp6v1a	307.943			Abcc5	309.551
Stk25	308			G3bp2	307.624			Rpl41	309.495
Gnb2	307.697			Sf3b2	307.58			G3bp2	309.35
Rpl38	307.497			Cct7	307.457			Smarca2	308.435
Sipa1l1	307.382			Rpl28	306.773			Pnmal2	308.092
Dnm1l	307.321			Rpl38	306.458			Zbtb18	308.019
Rundc3a	307.019			Arel1	306.287			Rasgef1a	307.426
Hk1	306.981			Tyro3	306.016			Nrxn1	307.218
Plekhb2	306.695			Pisd-ps1	305.143			Mprip	307.131
Sez6l	306.004			Lppr4	304.298			Lingo1	307.016
Atp5j2	305.506			Pitpnm2	303.71			Dnajc6	306.907
Smarcc2	305.405			Rundc3a	303.617			Prpf19	306.628
Tmem59l	305.151			Ap2a1	303.6			Eid1	306.013
Hnrnpa1	305.106			Clip3	303.482			Rpl26	305.198
Tppp	305.072			Sept7	303.406			Ahcyl1	304.762
Ndufa13	305.069			R3hdm4	302.448			Dnajc5	304.702
Ncl	304.652			Tenm4	302.221			Srsf5	304.507
Ndufv2	304.128			Ngfrap1	302.133			Pacsin1	304.404
Lsamp	304.1			Nefl	301.949			Slc1a3	304.247
Rps15a	304.058			Cdc42bpa	301.742			Rps3a1	303.442
Myo5a	303.648			Scamp5	301.485			Rnf10	302.123
Nfe2l1	302.852			Atp6ap2	301.118			Atp6v1h	302.072
Ap2a1	302.572			Ndufv2	300.447			Rab11fip4	302.016
Meg3	302.497			Gabrb3	300.306			Atp5j	301.494
Atp2b2	302.035			Rps15a	300.299			R3hdm2	301.367
Adam22	301.226			Mbnl2	299.88			Dos	301.063
Lamp1	301.063			1700003D09Rik	299.506			Jph4	300.596
Ncald	300.057			Tpm1	299.015			Rac1	300.097
Mtpn	299.58			Kcnab1	298.99			Cox5a	299.808
Eid1	299.501			Grik2	298.89			Atpif1	299.399
Morf4l2	298.752			Tmem158	298.439			Arnt2	298.592
Cs	298.669			Prkcb	298.258			Stk16	298.115
Dzank1	298.313			Abhd12	297.804			Spock1	297.854
Sf3b2	298.163			Lzts3	297.673			Syt7	297.172
Rbm5	297.66			Herc1	297.563			Rangap1	296.138
Dynll1	297.446			Mfge8	296.498			Cnbp	296.091
Ssbp4	297.343			Bag6	295.764			Pam	295.867
Herc1	297.31			Rps13	294.268			Gnb2	295.733
Slc32a1	296.74			Spock3	293.655			Unc80	295.335
Dpysl2	296.512			Rab6a	293.458			Atp6v0c	295.118
Enpp5	295.927			Sept5	293.378			Psip1	294.973
Fam168b	295.669			Prkar2b	293.058			Morf4l2	294.504
Rapgef4	295.588			Zfp706	292.617			Rab15	294.151
Tmem132a	295.506			Cnih2	292.538			Ap1s1	293.393
Ncam1	295.301			Rab2a	292.454			6330403K07Rik	293.284
Kif21a	294.802			Zfr	292.39			Rnf11	292.801
Rbbp7	294.673			Rps10	292.327			Trim37	291.978
Lppr4	294.431			Rpl21	291.43			Rpl6	291.463
Sdhb	293.986			Ip6k1	291.089			Psmb4	290.898
2610507B11Rik	293.632			Ccnl2	290.706			Rps5	290.652
Rnf10	292.594			Ahcyl1	290.626			Madd	290.421
Zmat2	291.934			Luc7l3	290.593			Cdip1	290.332
Dnajc7	291.886			Chn1os3	290.397			Slc4a10	289.278
Atp5j	291.23			Npm1	289.92			Npdc1	289.132
Syne1	291.018			Kifap3	289.498			Hprt	289.006
Actr1b	290.786			Psmb4	288.967			Ly6h	288.734
Tmbim6	290.536			Snap47	288.68			Nsg1	288.447
Camta1	290.272			Scamp1	288.451			Mapk8ip2	288.033
R3hdm4	290.165			BC005537	288.428			Slc25a22	287.917
Psmb4	290.098			Dnm1l	288.159			Matk	287.779
Actr2	289.995			Ncam1	287.407			Trim9	287.739
Itfg1	289.865			Sfi1	287.104			Mmd	287.359
Slc25a23	289.23			Pnisr	287.047			Plk2	286.929
Scg3	289.126			Srsf1	286.85			Sf3b2	286.864
Atp6v0d1	289.011			Dmtn	286.769			Kcnab2	286.803
Tyro3	288.969			Gls	286.086			Arpc1a	286.757
Nrsn2	287.885			Cct8	285.53			Cap2	286.734
Mkl2	287.437			Wasf1	285.063			Map7d1	286.303
Cox5a	287.368			Add1	284.927			Lamp1	286.258
Caprin1	287.271			Epn1	284.01			Rps11	286.19
Spag9	286.751			Lancl1	283.733			Tmsb10	285.943
Akap9	286.495			Dos	283.178			Nfe2l1	285.866
Map4	285.988			Kidins220	282.589			Fam171b	284.725
Rps10	285.957			Rps6	282.421			Rab3c	283.754
Podxl2	285.881			Map4	282.171			Dnm1l	283.69
Akap11	285.064			Serinc3	282.057			Prepl	283.646
Eif4b	284.947			Ehmt2	281.594			Peg3	283.501
Cpne7	284.843			Rreb1	281.441			Cadm4	283.406
Ppp1ca	284.666			Sipa1l1	280.939			Rpl37a	283.139
Vgf	284.647			Ndufv1	280.751			Disp2	282.912
Rps9	284.623			Zmynd11	280.748			Cadps	282.556
Serpine2	284.58			Cyld	280.34			Ddb1	282.553
Atp2b4	284.454			Vdac2	280.312			Napa	282.184
Gas7	284.297			Ptov1	280.201			Eef1g	282.015
Atpif1	283.94			Rac1	280.109			Ppme1	281.693
Sparc	283.716			Sdhb	279.241			BC005537	281.636
Eif3c	283.401			Pdxk	279.045			Gabbr2	281.553
Sdcbp	283			Dynll1	278.552			Ubr4	281.468
Anp32a	282.949			Nsmf	278.372			Amph	281.371
Rufy3	282.765			Pfdn5	278.334			Herc2	281.184
Mapt	282.628			Arpc2	277.766			Tmbim6	280.63
Atp2b1	281.578			Sez6l2	277.722			Strn4	280.604
Synj1	281.554			Lypd1	277.545			Vti1b	279.982
Rasl10b	281.515			Rnf10	277.274			Morf4l1	279.815
Stip1	280.678			Ppp2r5b	277.147			Arpc2	279.722
Tomm70a	280.406			Evl	276.395			Prdx5	279.411
Igsf8	280.233			Nrd1	275.199			Chn1os3	279.158
Pitpna	280.055			Rpl5	275.179			Idh3a	279.132
Mfge8	279.985			Map7d1	275.007			Cs	278.861
Dennd5a	279.601			Slc6a17	274.973			Usp5	278.599
Cnih2	279.543			Atp6v1c1	274.593			Rps25	278.12
Usp5	278.799			Sort1	274.311			Cend1	277.873
Ip6k1	277.915			Glud1	273.814			Gria3	277.787
6330403A02Rik	276.881			Ddx39b	273.58			Frrs1l	277.695
Ran	276.509			Ctsd	272.748			Spag9	276.566
D430019H16Rik	276.491			Fis1	272.241			Rab1	276.475
Smarca2	276.272			Hdac11	272.074			Sdhb	276.293
Lypd1	275.734			Prkcz	271.948			Kidins220	276.177
Srsf5	275.65			Pink1	271.703			Atp2b4	275.675
Rps26	275.63			Cyc1	271.256			Sars	275.459
Eif5	275.407			Vcp	270.525			Elmod1	275.252
Ehmt2	275.346			Nrsn2	270.357			Arpc3	274.682
Gls	274.623			Cct2	269.543			Vdac2	274.194
Oxct1	273.825			Rpl36	269.258			Dmxl2	274
Map7d1	273.658			Nedd4l	269.033			Pclo	273.666
Hspa4	273.229			Chd4	268.93			Actr2	273.297
Vdac2	272.716			Psmd2	268.924			Nrd1	273.053
Crip2	272.674			Ubqln2	268.86			Rufy3	273.041
Pianp	272.58			Cyp46a1	268.526			Lynx1	272.869
Gm13339	272.53			Ddb1	268.053			Tcp1	272.466
Cyld	271.905			Adam22	267.814			Strbp	272.385
Gnl3l	271.292			Nrxn3	266.636			Arhgap32	272.273
Grm5	270.957			Itfg1	266.263			Icam5	272.206
Dnaja2	270.902			Ybx1	266.078			Itfg1	272.147
Kcnip2	270.601			Trrap	265.663			R3hdm4	272.14
Clta	270.181			Saraf	265.12			Sorbs2	271.915
Mgea5	270.175			Eif5	265.018			Snph	271.647
Rplp0	270.172			Cdip1	264.751			Map1lc3a	271.169
Hspa9	270.001			Grik5	264.667			Ube2b	271.129
Cox7a2	269.618			Srsf6	264.658			Clta	271.085
Negr1	269.357			Tubb4a	264.543			Tef	270.959
Cadm1	269.305			Rab3c	264.502			Kif21a	270.934
Serbp1	269.232			Rbm25	263.973			Pja1	270.623
Slc25a5	268.751			Napb	263.854			Srcin1	270.437
Araf	268.334			Nap1l5	263.715			Slc39a10	270.21
Csnk1a1	268.165			Akap11	263.435			Sec62	270.144
Necap1	267.855			Hnrnpa1	262.521			Rab7	269.775
Myl12b	267.833			Mast3	262.475			Adam22	269.587
Cadm4	267.403			Slc25a23	262.446			Cdk5r2	269.577
Csde1	267.259			Eif4g1	262.301			Nudt3	269.57
Anks1b	267.216			Agrn	262.018			Cdc42bpa	268.536
Pgk1	267.15			Cs	261.991			Ndufa13	268.096
Gprasp2	266.846			Ndufb5	261.302			Pisd-ps1	268.013
Emc10	266.654			Synj1	261.15			Syt4	267.038
Rpl36a	266.339			Abi2	261.062			Smim13	266.99
Vps41	266.271			Ube2b	260.726			Bzrap1	266.837
Pfdn5	266.248			Usp48	260.719			Dnaja1	266.789
Prdx5	265.651			Acot7	259.672			Atp5j2	266.656
Idh3a	265.189			Timp2	259.632			Cct2	265.875
Psd3	264.799			Chchd2	259.53			Ndufv1	265.106
Bag6	264.099			Arhgap33	259.5			Tspan5	264.783
Psmc5	263.638			Rps16	259.384			Cyc1	264.481
Rpl28	263.039			Cct5	258.997			Ptprd	264.278
Wdr1	261.686			Arhgdia	258.95			Csnk1a1	264.035
Copa	261.637			Rbck1	258.931			Rbm5	263.531
Mapk10	261.457			Otub1	258.92			Astn1	263.085
Ubqln2	261.312			Abhd8	258.668			Rpl21	263.04
Ube2b	261.057			Pkia	258.61			Bex2	262.815
Blcap	260.859			Wdr13	258.074			Psmb1	262.721
Pdia6	260.616			Csnk1a1	257.785			2610507B11Rik	262.69
Gng3	260.595			Emc10	257.477			Dnajc7	262.198
Fam131a	260.458			Mkl2	256.851			Prrc2a	261.681
Gdi2	260.144			Sept3	255.963			Mgea5	261.478
C2cd2l	260.053			Wbp2	255.627			Cct5	261.346
Nr1d1	259.998			Cap1	255.409			Pls3	261.195
Npdc1	259.663			Cox5b	255.134			Hnrnpc	261.076
Unc13a	259.574			Srsf7	255.083			Coro1a	260.873
Pkia	259.537			Trip12	254.35			Flot1	260.745
Lrpap1	259.432			Prkce	254.104			Eif4g3	260.721
Zfp706	259.202			Pja1	254.043			Adrbk1	260.205
Capns1	258.987			Arglu1	253.771			Mff	260.177
Atp6v1h	258.73			Celf3	253.56			Cox6c	260.16
Dbn1	258.608			Serpine2	253.345			Chst1	260.056
Rps13	258.607			Clta	252.06			Gm15564	260.051
Rab3c	258.416			Cacnb4	251.9			Slc20a1	259.65
Cyc1	258.309			Spag9	251.49			Smarcc2	259.303
Prpf8	258.195			Gnl1	251.436			Dnaja2	259.053
Capza2	257.832			Cpne6	251.183			Wasf1	258.595
Sucla2	257.72			Usp7	250.844			Fam168b	258.398
Mapk3	257.393			Abca2	250.508			Srrm2	257.629
Rpl36	256.894			Smg1	250.04			Gm13339	257.527
Bin1	256.843			Pak1	249.76			Dpp10	257.402
Brsk1	256.672			Tsnax	249.544			Gad1	256.568
BC005537	256.667			Atp5d	249.207			Psmb7	256.493
Usp34	256.563			Mapt	248.898			Fam49a	256.493
Agap3	256.063			Sec62	248.394			Luc7l3	256.099
Zranb2	255.936			Mtpn	248.148			Ypel3	256.041
Ndufb5	255.92			Atp6v0d1	248.137			Mobp	255.977
Slc25a22	255.88			Anp32a	247.53			Sprn	255.752
Psmb7	255.403			Atpif1	246.734			Ndufv2	255.657
Sgsm1	255.3			Actr2	246.668			Cyp46a1	255.602
Chchd2	255.264			Prpf8	246.652			Capza2	255.572
Rplp2	254.919			Tial1	246.233			Cdk5r1	255.553
Cdk17	254.624			Actr1b	246.121			Eif3c	255.537
Hnrnpdl	254.617			Anks1b	246.06			Pdha1	255.515
Ankrd46	254.285			Herc2	245.923			Abhd8	255.401
Srsf1	254.108			Srpk2	245.781			Vps41	255.188
Pdha1	253.763			Dennd5a	245.529			Uhmk1	255.183
Cdk5r1	253.6			Serbp1	245.521			Bag6	255.101
Scn2b	253.1			Uqcr11	245.216			Srpk2	254.798
Stmn4	252.995			Smarca2	244.994			Ran	253.532
8430419L09Rik	252.856			Dnaja1	244.873			Nrxn2	252.964
Ap3d1	251.804			Man2a2	244.685			Pebp1	252.962
Evl	251.573			Morf4l2	244.675			Abi2	252.92
Abhd8	251.559			Swi5	244.582			Scn8a	252.728
Gstm5	251.154			Eml5	244.488			Igsf8	252.705
Pnisr	251.151			Hp1bp3	244.472			6430548M08Rik	252.702
Tmsb10	251.074			Syn1	243.89			D17Wsu92e	252.695
4932438A13Rik	250.522			2010107E04Rik	243.88			Rpl7	252.639
Ddx24	250.358			Tardbp	243.768			Klhdc3	252.298
Rab7	250.225			Gde1	243.622			Phyhipl	252.276
Trim44	249.731			Stip1	243.567			Stip1	252.222
Dcaf7	249.614			Sorl1	243.225			Dlgap4	252.17
Dnaja1	249.331			Dnaja2	243.147			Rpl18a	251.937
Ik	248.863			Idh3g	243.083			Cap1	251.873
Abcc5	248.86			Stub1	242.538			Prkcz	251.583
Hprt	248.794			Tia1	242.537			Ncam1	251.527
Rpl5	248.68			Brsk1	242.254			Sez6	251.437
Hspd1	248.554			Tmem132a	242.202			Slc25a23	250.822
Matk	248.476			Zfp365	242.171			Gabrb3	250.248
Rgs14	248.373			Usp11	242.142			Plekhb2	250.227
Cbx5	248.155			Klhl2	242.14			Mal2	250.163
Bcan	247.9			Ap3d1	241.98			Ptpra	249.978
Scamp1	247.259			Fam171b	241.553			Rpl38	249.931
Mobp	246.85			Rpn2	241.426			Atcay	249.923
Ndufv1	246.687			Nlgn2	241.212			Cdk17	249.741
Rabac1	246.544			Zmat2	241.119			Nrn1	249.646
Atp8a1	246.449			Slmap	241.086			Atxn7l3	249.236
Rpl10	246.111			Nfe2l1	240.843			Syt13	249.198
Marcks	245.784			Unc80	240.824			Cuedc2	249.137
March6	245.538			Tmx4	240.324			Capzb	249.049
Wsb2	245.144			Clk4	239.683			Lancl1	248.831
Vti1b	245.111			Lamp1	239.528			Nlgn2	247.908
Puf60	244.804			Igsf8	239.506			Adcy2	247.765
Tkt	244.728			Cdk5r1	239.31			Stub1	246.798
Ddx1	244.642			Camk4	239.297			Brk1	246.756
Hp1bp3	243.922			Ncl	239.193			Chchd2	246.486
Chmp4b	243.762			Lrrfip1	239.083			Rabac1	246.446
Aak1	243.628			Cct3	238.774			6330403A02Rik	245.862
Bai1	243.461			Nell2	238.575			Scn2a1	245.562
Suclg1	243.436			Rnf14	238.519			Slc6a1	245.048
Rps3	243.319			Hspa9	238.506			Fkbp3	245.047
Dalrd3	242.93			Arl6ip1	238.32			Hnrnpdl	244.866
Ptprn2	242.899			Rpl36a	238.31			Ap3d1	244.735
Cct3	242.83			Tmod2	238.285			Ddx1	244.343
Astn1	242.764			Atp5g1	237.961			Fasn	244.324
Lonrf2	242.653			Ndufa5	237.883			Rock2	244.278
Supt6	241.263			Lrpap1	237.87			Cdk16	243.883
Sec62	241.243			Psmc5	237.794			Idh3g	243.736
Rbfox1	240.779			Araf	237.641			Cpne6	243.728
Xpo1	240.717			Map3k12	237.458			Clk1	243.579
N28178	240.707			Sh2d5	237.435			Arhgef25	243.565
Atp5k	240.398			Ik	237.377			Ube2ql1	243.502
Cox6c	240.212			Cox7c	237.189			Nars	243.488
Atp5g1	240.135			Csde1	236.891			Psmc3	243.447
Hnrnpl	239.845			Tmem59	236.762			Copa	243.145
Zer1	239.821			Phyhipl	236.758			Cmip	243.117
Rps16	239.796			Slc2a13	236.67			Pdia6	242.996
Rab1	239.734			Eif3c	236.634			Cox7b	242.569
Ogdh	239.442			Wdr6	236.589			Ap3b2	242.441
Rtcb	238.77			Prdx5	236.377			Parp6	241.916
Meis2	238.314			Usp5	236.282			Pfdn5	241.906
Gpr88	238.02			Pnck	236.137			Pnisr	241.888
Ap1s2	237.977			Slc32a1	235.895			Ak5	240.876
Nars	237.615			Rab11fip4	235.864			Adap1	240.862
Mrfap1	237.232			Sdf4	235.675			Atp2c1	240.292
Ywhaq	237.208			Ppp1r7	235.639			Ankrd46	240.029
Camk4	237.195			Chst1	235.62			Mink1	239.793
Basp1	237.15			Ice1	235.511			Crym	239.768
Syngr1	237.091			Mef2d	235.336			Swi5	239.754
Unc80	237.028			Plekha5	235.303			Slc24a2	239.743
Ppp2r5b	236.951			Atrx	235.214			Gnl1	239.439
Rpl7a	236.911			Dpp6	234.779			Wdr13	239.13
Otub1	236.831			Gtf3c1	234.73			Dennd5a	238.917
Ap1b1	236.824			Rnd2	234.176			Lrpap1	238.912
Psmc2	236.528			Ubl3	233.338			Tmx4	238.905
Sh3glb2	236.431			Fam168b	233.32			Sdf4	238.84
Pdzd4	236.303			Rufy3	232.997			Hspa4	238.357
Cox5b	235.675			Srrm1	232.768			Rpl31	237.971
Rbbp4	235.525			Dlg1	232.34			Ivns1abp	237.825
Gng2	235.494			Mapk10	232.318			Tpm1	237.7
Abi2	235.454			Napa	232.001			Eps15	237.673
Lancl1	235.342			Eif4b	231.819			Arrb1	237.5
Pebp1	235.24			Dlgap4	231.662			Eif5	237.222
Fam168a	235.124			Mmd	231.354			Tuba1b	236.879
Mif	234.975			Acsl6	231.18			Gpr162	236.8
Rab14	234.969			Dbi	231.022			Sdcbp	236.609
Gnl1	234.967			Sorbs2	230.959			Trim44	236.498
Srrm2	234.655			Unc79	230.833			Scamp1	236.34
Herc2	234.549			Sfpq	230.722			Crip2	235.765
Fasn	234.536			Puf60	230.72			Arl8b	235.273
Gmfb	234.533			Parp6	230.696			Ctnnd2	235.216
Arpp19	233.901			Bcl11b	230.574			Tomm20	235.14
Aff4	233.875			Prpf19	230.212			Gdi2	235.065
Ap2a2	233.874			Myh10	230.093			Otub1	234.891
Sars	233.462			Ndufb10	229.907			Cnr1	234.8
Rap1gds1	233.436			Idh3a	229.592			Cacna2d1	234.274
Hnrnpul2	233.352			Ubl5	229.329			Apc	234.218
Pabpc1	232.584			Pitpna	229.256			Fam134a	234.197
Ptplad1	232.495			Dnajc5	229.133			Caly	234.065
Anxa6	232.32			Myl12b	229.117			Stk32c	234.032
Fus	231.936			Ppp1r12c	228.944			Cltb	234.027
Tonsl	231.832			Caprin1	228.914			Grik5	233.917
Ddx3x	231.584			Rps26	228.863			Git1	233.601
Mff	231.182			Cend1	228.825			Lsamp	233.425
Fkbp3	231.146			Svop	228.747			Rps15a	232.914
Necab1	231.086			Gda	228.691			Hivep2	232.482
Nts	230.973			Fam49b	228.539			Scg2	232.39
Spryd3	230.769			Bag1	228.503			Chl1	232.389
Cend1	230.701			Sdcbp	228.323			Rheb	232.181
Tiam1	230.181			Pcdh10	228.212			Ip6k1	231.894
Ssb	230.089			Pfkl	228.206			Atp8a1	231.715
Swi5	230.002			Rpl7a	228.048			Atp5d	231.631
Nlgn2	229.989			Ttll7	227.831			Zranb2	231.316
Strap	229.854			Mctp1	227.745			Map3k12	231.298
Ptov1	229.708			Tagln3	227.496			Tro	231.206
Crmp1	229.482			Fkbp3	227.409			Rap1gap	231.187
Tub	229.479			Sumo3	227.332			Podxl2	231.037
Srsf7	229.42			Pebp1	227.168			Bag1	230.956
Arl8b	229.303			Dmxl2	227.147			Abca2	230.903
Sept8	228.938			Morf4l1	226.979			Pcdh10	230.709
Aamp	228.847			Vgf	226.979			Kif3c	230.682
Trip12	228.254			Capza2	226.968			Tonsl	230.644
Rpn1	228.175			Psmb7	226.843			Cep170b	230.619
Fam134a	228.072			Foxp1	226.572			Pmm1	230.504
Trim37	227.736			Mat2a	226.551			Srsf11	230.414
Plcb1	227.461			Rpl23a	226.417			Fam168a	230.355
Nxf1	227.418			Cox7b	226.4			Ndufb5	230.127
Atp5d	226.693			Hnrnpm	225.814			Rab14	230.013
Gstm1	226.598			Dock3	225.628			Capns1	229.923
Ppp2r4	226.543			Celf1	225.278			Cdk5	229.896
Adcyap1r1	226.187			Suclg1	225.03			Timp2	229.843
Pura	225.818			Kcna1	224.749			Anp32a	229.439
Ank3	225.111			Srp14	224.415			B3gat1	229.439
Camk1g	224.954			Npdc1	224.369			Trim2	229.093
Adam23	224.731			Eif3f	224.255			Ptov1	228.923
Nudt3	224.394			Plekhb2	224.054			Actr1a	228.286
Dlg3	224.386			Laptm4a	224.042			Atp5g1	228.266
Nbr1	224.16			Tceb2	223.813			Chga	228.198
Cox7b	224.054			Ptpra	223.461			Necap1	228.084
Prkaca	223.915			Ran	223.259			Tmem151a	227.714
Prickle2	223.874			Paip2	223.156			Ik	227.677
Nrcam	223.704			Astn1	223.138			Ryr2	227.673
Park7	223.696			Nfx1	223.048			March6	227.478
Capzb	223.487			Rarb	222.487			Nr1d1	227.377
Magee1	223.217			Osbpl8	222.192			Usp34	226.775
Sorl1	223.128			Atp6v1h	222.141			Dlg3	226.752
Gars	222.923			Nudt3	222.103			Gsk3a	226.725
L1cam	222.698			Tln2	221.799			Myh10	226.675
Arnt2	222.303			2900011O08Rik	221.746			Pcmt1	226.587
Zmynd11	222.165			Eif4g3	221.686			Tom1l2	226.007
Tmem179	221.776			Strn4	221.633			Usp22	225.968
Bcr	221.658			Akap9	221.619			Rps10	225.911
Mboat7	221.525			Chgb	221.23			Dync1li2	225.616
Hpcal1	221.516			Arf5	220.955			Hspa9	225.586
Actr1a	221.327			Tmem59l	220.528			Laptm4a	225.5
Mef2d	221.232			Sars	220.453			Snrnp70	225.42
R3hdm1	220.797			Bclaf1	220.35			Wdr1	225.297
Mbnl1	220.698			Cntn1	220.33			Arc	225.27
Slc4a10	220.622			Palm	220.258			Camk2g	225.082
Pitpnm1	220.452			Cuedc2	220.074			Ubl5	225.039
Pdxk	220.3			Ubp1	220.059			Mef2d	225
Btf3	220.268			H3f3b	219.998			Nat8l	224.84
Ube2d3	219.98			Dlg3	219.949			Prkaca	224.702
Mapre2	219.918			Ddx1	219.609			Scn2b	224.647
Zfp365	219.903			Dclk3	219.567			Ccni	224.567
Sumo3	219.807			Rplp0	219.531			Hnrnpl	224.486
Wipf3	219.377			Ankrd63	218.935			Eef1b2	224.233
Pmm1	218.89			Snap91	218.784			Usp7	223.894
Gabrg1	218.799			D430019H16Rik	218.671			Hnrnpa1	223.686
Tardbp	218.768			Elavl3	218.185			Rbm25	223.359
Bzrap1	218.72			Prdx6	218.031			Hdac5	223.349
Rpl18	218.655			Rab7	218.004			Nxf1	223.298
Celf5	218.508			Akap8l	217.927			Hnrnpul2	223.27
Ap2s1	218.449			Srrt	217.683			Chmp4b	223.254
Wdr13	218.305			Aak1	217.645			Puf60	223.244
Rpl23a	218.142			Sucla2	217.407			4932438A13Rik	223.16
Laptm4a	217.549			Arrb1	217.186			Garnl3	222.737
Smap2	217.438			C2cd5	217.127			Tspan13	222.325
Inpp5f	217.28			Hspa4	217.098			Dbn1	222.216
Eif3a	217.144			Pmm1	216.378			Rap1gap2	222.197
Fam171b	217.117			Ttyh3	215.684			Gm15800	222.173
Nomo1	216.996			1700020I14Rik	215.566			Cnih2	221.899
Psmc1	216.948			Park7	214.826			Slc25a5	221.574
Spg21	216.828			Arnt2	214.737			Ipo5	221.273
Car11	216.826			Mapk8ip2	214.708			Serbp1	221.035
1700037H04Rik	216.674			Rogdi	214.628			Evl	221.011
Usp7	216.283			Trp53bp1	214.519			Tmem130	220.89
Idh3g	216.211			Vps41	214.459			Iqsec1	220.596
Adrbk1	215.738			Gm15800	214.345			Nbea	220.5
Cct4	215.009			Sf1	214.169			Csde1	220.114
Dner	214.998			Trim37	214.048			Atp5k	220.107
Usp14	214.887			Nr1d1	214.041			Aars	219.932
Grik5	214.772			Supt5	213.813			Ctbp1	219.835
Pkp4	214.721			Rbbp4	213.536			Dynlrb1	219.646
Ptprz1	214.685			Neurl1a	213.244			Sucla2	219.559
Rps2	214.517			Paxbp1	213.21			Cdk14	219.51
Itpka	214.347			Cdk5	212.84			Pura	219.389
Prdx1	214.333			Ndufs1	212.77			Ddx24	219.386
Rpl15	213.738			Drd1a	212.698			2010107E04Rik	219.26
Cyp26b1	213.58			Pgk1	212.33			Ppp6r1	219.123
Mat2a	213.396			Drosha	211.851			Spryd3	218.735
Ndufs1	213.346			Rab14	211.328			Cox5b	218.637
Ubl5	213.255			Mapre2	211.167			Rps8	218.514
Rnf112	213.234			Arhgap32	210.825			Psmc2	218.093
Mbnl2	213.114			Nbea	210.443			Klhl2	217.985
Hint1	212.609			Habp4	210.316			Rpl28	217.974
Phyhipl	212.368			Noc2l	210.279			Mmp17	217.612
Cuedc2	212.26			Pabpc1	210.172			Tmem59	217.601
Atcay	212.125			Gm15564	210.084			Trip12	217.331
Paip2	211.659			Tonsl	209.56			Arl8a	217.061
Kbtbd11	211.536			Arpc3	209.369			Enpp5	217.048
Nrd1	211.3			Rps20	209.352			Cadm1	216.997
Ppp2r5d	211.191			Ctbp1	209.081			Usp14	216.961
Snrnp70	210.897			Brk1	209.055			Psmc1	216.628
Pafah1b2	210.871			Actl6b	209.01			Lztr1	216.591
Trp53bp1	210.847			Atp8a1	208.922			Ppm1e	216.475
Dcaf8	210.64			Usp34	208.908			Cdc37	216.347
Tceb2	210.454			Gramd1a	208.69			Prpf8	216.019
Dynlrb1	210.283			Focad	208.67			Mif	215.871
Prkcb	210.221			Necap1	208.616			Inpp4a	215.667
Usmg5	210.134			Gdi2	208.611			Car11	215.623
Cntn1	209.88			Pclo	208.578			Rps13	215.327
Cacna2d3	209.561			Fam120a	208.3			Gucy1b3	214.911
Pde1a	209.302			Luc7l2	208.278			Zfp706	214.548
Eml2	209.301			Hprt	208.109			Dzank1	214.466
Ppp6r1	209.087			Ogdh	207.749			Dock3	214.391
Prmt1	209.075			Mrfap1	207.66			Tcf4	214.215
Cnr1	208.888			Chmp2a	207.655			Map2k4	213.798
Ap3b2	208.848			Scg3	207.562			Nedd8	213.764
Eif3f	208.758			Ppp2r5d	207.547			Itpka	213.729
Rps20	208.651			Capzb	206.969			Tardbp	213.684
Rbm25	208.332			Sept15	206.769			Cadm2	213.422
D17Wsu92e	208.131			Mif	206.753			Rps9	213.376
Map2k4	208.076			Adam23	206.548			Dlg1	213.361
Clptm1	208.038			Rab1	206.52			Adora1	213.164
Kcnab2	207.832			Ergic3	206.432			Ap1b1	213.138
Nap1l4	207.647			Enpp5	206.375			Supt5	213.05
Plk2	207.62			Ddx3x	206.281			Ngfrap1	212.996
Gde1	207.445			Syt6	206.273			Zmynd11	212.647
Ak5	207.371			Rabac1	206.231			Drosha	212.628
Cntnap2	207.037			Amfr	205.899			Araf	212.238
Atp1b2	206.904			Ankrd46	205.77			Srp14	212.163
Bclaf1	206.88			Dpp10	205.665			Glrb	212.139
Rab11fip4	206.872			Pdha1	205.617			Nkiras1	212.09
Chd5	206.446			Sparc	205.304			Ttc7b	212.082
Sdc3	205.892			Smarcc2	205.225			Elavl3	211.616
Rgs2	205.851			Copa	205.186			Ttll7	211.488
Ddx39b	205.804			Snrnp200	205.174			Srebf2	211.383
Myh10	205.517			Ap2s1	205.163			Emc10	211.227
Hdac2	205.396			Hnrnpul2	204.908			Gmfb	211.14
Rpl10a	205.226			Ap2a2	204.705			Agap3	211.037
Atp13a2	205.088			Smarca4	204.638			Fscn1	210.958
Actr3	204.691			Mapk3	204.387			Agrn	210.92
Rpl35a	204.687			Wsb1	204.257			Marcks	210.533
Abca2	204.672			Dgkb	204.102			Ddx39b	210.201
Atp2c1	204.667			Rabl6	204.064			Fis1	210.118
Prkcz	204.552			Actr3	203.963			Pkia	210.082
Ablim2	204.549			Hk1	203.842			Slc30a9	210.06
Arpc3	204.411			Far1	203.78			Slc2a3	209.734
Ppme1	204.41			Usmg5	203.596			Fus	209.721
Nudc	204.384			Stk32c	203.421			Hp1bp3	209.467
Cox7c	204.293			Cap2	203.261			Opcml	208.726
Nrxn3	204.244			Prpf39	203.083			Gars	208.327
Trrap	204.075			Ndufa3	202.91			Celf5	208.304
Ppp1r9a	204.057			Eif3k	202.797			Npm1	208.24
Fhl1	203.83			Gng3	202.581			Rps6	208.164
Rheb	203.808			Ppp6r1	202.382			Zer1	208.151
Slc30a9	203.771			Sbno1	202.304			Tceb2	207.771
Tspyl2	203.71			Zranb2	202.163			Ptplad1	207.626
2010107E04Rik	203.654			Myt1l	202.001			Cdipt	207.268
Fis1	203.635			Rps2	201.854			Gng2	207.158
Stmn2	203.612			Ssb	201.842			Hmgcr	207.155
Kif3c	203.504			Birc6	201.779			Park7	207
Tmeff1	203.428			Xpo1	201.741			Gabrg2	206.942
Fam49b	203.393			Tnk2	201.626			Napg	206.823
Stub1	203.384			U2af2	201.612			Rnf220	206.738
Cyp46a1	203.298			Scn8a	201.436			Acsl6	206.672
Nbea	203.279			Snph	201.407			Hdac11	206.657
Pclo	203.226			Gripap1	201.295			Nudc	206.624
Elavl3	203.196			Smap2	201.199			Dcaf7	206.433
Tbc1d9b	203.176			Safb	201.123			Syngr3	206.361
Ndufa10	202.993			Ptplad1	201.113			Ddx3x	206.298
Sfpq	202.972			Vti1b	200.887			Srgap3	206.133
Cdc42bpa	202.965			Dalrd3	200.695			Rnf157	206.098
Cacna2d2	202.771			Fam168a	200.433			Mgrn1	206.065
Ddost	202.703			Foxp2	200.397			Rasl10b	205.925
Scrn1	202.618			Cadm1	200.393			1110008P14Rik	205.828
Tia1	202.489			Trim44	200.235			Agtpbp1	205.716
Uqcr11	202.463			Scrn1	200.234			Fads1	205.639
Lzts3	202.382			Ppp1r1a	200.004			Mast3	205.432
Ubr5	202.244			Dlgap3	199.458			Atp13a2	205.377
Tpm1	202.167			Trim9	199.328			Arf5	205.348
Kalrn	201.617			Crip2	199.062			Mapk9	205.223
Cap2	201.568			Pacsin1	198.957			Ppp1r12c	205.142
Ppp1r7	201.433			Megf8	198.826			Rogdi	205.134
Fkbp4	201.398			Dcaf8	198.373			Akap11	205.016
Pacsin1	201.343			Rpl35a	198.109			Mapre2	204.883
Necab2	201.284			Aamp	197.984			Rusc1	204.796
Stx12	201.219			Gpr39	197.646			Ogdh	204.747
Rbfox2	201.124			Strn	197.259			Kcnh3	204.305
Ergic3	201.081			Cacnb3	197.187			Scrn1	204.271
Celf1	200.979			Fam134a	197.062			Mapre3	204.02
Trim2	200.7			Smarcd3	196.903			Tsnax	203.986
Snph	200.685			Wsb2	196.847			Fnbp1l	203.929
Ssr1	200.641			Trim28	196.546			Slc4a3	203.717
Wasf1	200.637			Akap5	196.31			Crmp1	203.624
Gnai2	200.434			Baz1b	196.166			Cacnb4	203.604
Eif4g3	200.081			St13	196.103			Eml2	202.943
H3f3b	199.982			Rpl10	195.983			Rbfox2	202.748
Nell2	199.76			Kmt2a	195.794			Trim32	202.742
Cdc37	199.479			Gm27031	195.79			Ppp2r4	201.947
Shisa7	199.412			Gnb5	195.742			Ahsa1	201.223
Kpnb1	199.38			Sec14l1	195.693			Nrxn3	201.207
Lppr2	199.22			Fasn	195.531			Arhgef4	201.168
Pcmt1	199.095			Pde4b	195.512			Prdx1	201.092
Dnajc6	198.882			Egr1	195.408			Pde1a	200.938
Hars	198.851			Nktr	195.324			Sipa1l1	200.723
Pgm2l1	198.805			Fam131a	195.24			Ubqln2	200.416
Nrxn1	198.725			Ets2	195.21			Gnl3l	200.248
Nrsn1	198.558			Pura	195.145			Pitpnm1	200.184
Rpl34	198.47			Tspan13	195.124			Pafah1b2	200.152
Pam	198.453			Tra2a	194.91			Atrx	200.024
Mt1	198.207			Gnb2l1	194.808			Fam49b	199.963
Supt5	198.142			Brinp1	194.73			Kcnf1	199.719
Ndufa3	197.993			Supt6	194.723			Glud1	199.713
Ndufa9	197.923			Plcb1	194.551			Anks1b	199.511
Cltb	197.802			AI593442	194.538			Rpl5	199.327
Arhgef17	197.755			Scn3b	194.422			Mfge8	198.913
Rnf11	197.661			Ndufa6	194.302			Lpgat1	198.911
Ahsa1	197.648			Tppp	194.299			Rplp0	198.761
Hnrnpab	197.483			Ube2d3	194.212			Dstn	198.714
Acly	197.395			Gstm1	194.164			Tub	198.689
Srsf11	197.231			Uqcrb	194.145			Ptpn5	198.391
Sncb	197.229			Lmo7	194.08			Caprin1	198.295
Rpl12	197.163			Dzank1	194.032			Camk4	197.895
Tspan13	197.01			Rpl18	193.866			Rbbp4	197.715
Napa	196.82			Btf3	193.663			Dlgap3	197.435
Gsk3a	196.532			Atp2c1	193.612			Ehmt2	197.177
Os9	196.409			Kcnab2	193.603			Gpr26	197.172
Arhgap33	196.108			Golgb1	193.475			Atxn7l3b	196.981
Mlc1	195.796			Rgs8	193.426			Pianp	196.819
Scn2a1	195.775			Rnf11	193.191			Klc2	196.284
U2af2	195.725			Clptm1	193.134			Lppr4	195.974
Hnrnpm	195.622			Nrgn	192.853			Ank	195.187
Lmo3	195.602			Lmtk3	192.722			Smap1	195
Serpini1	195.575			Cct4	192.393			Glyr1	194.881
Smim14	195.391			Eif3h	192.286			Tomm70a	194.526
6430548M08Rik	195.203			Dgat2	192.237			Usmg5	194.449
Rasgrp1	195.197			Ndufa1	192.072			Fxyd7	194.2
Zmym3	194.935			Kif21a	192.064			Uqcr11	194.122
Efr3b	194.84			Mgrn1	192.021			Gnai1	193.384
Bcl11b	194.665			Tiam2	191.912			Vapa	193.298
Smg1	194.528			Hras	191.895			2010300C02Rik	193.232
Mapre3	194.397			Pianp	191.721			Synpo	192.989
Cplx1	194.151			Adcyap1r1	191.678			Srsf1	192.964
Tsnax	194.146			Nbr1	191.666			Dync1i1	192.904
Ubqln1	194.022			Sptb	191.457			Rpn1	192.854
Gm15800	193.616			Chmp4b	191.357			Actr3	192.843
Cfap36	193.583			Necab1	191.306			Ssbp3	192.816
Arel1	193.391			Zcchc7	191.294			Ank3	192.796
Mapk9	193.203			Psd3	191.247			Smap2	192.785
Eif3k	193.196			Ndufa2	191.059			Ttc9b	192.541
Dmxl2	192.824			AI314180	191.031			Rps19	192.424
Mef2a	192.533			Dapk1	190.756			Clcn4-2	192.368
Chst1	192.503			Uqcrq	190.711			Pbx1	191.917
Cand1	192.297			Hnrnpab	190.703			Rbfox1	191.88
Ndufb8	192.19			Pdzd4	190.686			Spop	191.792
Pum2	191.997			Rpl34	190.649			Mboat7	191.746
Trim35	191.861			Cltb	190.412			Reps2	191.73
Tm9sf2	191.668			Kcnj4	190.259			Hint1	191.65
Rps6ka2	191.59			Rangap1	190.144			Palm	191.49
Slc25a12	191.519			Mef2a	190.144			Ywhaq	191.379
Ptbp2	191.5			Gmfb	189.995			Sfi1	191.283
Acsl3	190.975			Atp5e	189.961			Tkt	191.19
Hdac5	190.921			Pum2	189.58			Ncl	190.983
Rnf220	190.906			Dnajb5	189.521			Ppfia3	190.977
Cdk5	190.876			Fads1	189.391			Necab1	190.802
Glyr1	190.667			Camta1	189.381			Camk1	190.538
Srpk2	190.637			Mapre3	189.3			Pkp4	190.247
Ppp2ca	190.566			Bin1	188.98			Paip2	190.058
2210016L21Rik	190.308			Arl8b	188.957			Dnajb5	190.026
Lcmt1	190.237			Syt4	188.942			Tax1bp1	189.565
Clptm1l	190.076			Tsc2	188.765			Sfpq	189.556
Sh3bp1	190.063			Hspd1	188.732			Agpat3	189.358
Ctbp1	189.977			Sepp1	188.659			Chchd10	189.243
Birc6	189.843			Ppp2r4	188.539			Eif4b	189.202
Nedd8	189.811			Rpn1	188.502			Vps35	189.198
Atp6v0c	189.435			Chtop	188.36			Camkk2	189.112
1110051M20Rik	189.022			Ndufb11	188.314			Camta1	188.975
Ina	189.015			Pitpnm1	188.214			Lppr2	188.974
Ftl1	189.001			Slc2a3	188.198			Nrip3	188.842
Rogdi	188.991			Mlc1	187.982			Mkl2	188.77
Dlgap3	188.952			Ndufs7	187.925			Jak1	188.644
Psmc3	188.778			Psmc2	187.82			Lrp11	188.212
2010300C02Rik	188.631			Klhl7	187.81			Chd3os	187.803
Sepp1	188.533			Fnbp1l	187.545			Neurl1a	187.72
Kcnh3	188.424			Sltm	187.38			Dcaf8	187.704
Sorbs2	188.378			Cpt1c	187.374			Cab39	187.692
Trpc4ap	188.29			Pdia6	186.865			Bzw1	187.273
Dlgap4	187.855			Prkaca	186.846			Rpl36	187.033
Habp4	187.566			Picalm	186.69			Ndufa10	186.882
Strn4	187.461			Pdhb	186.604			Dctn3	186.833
Prdx6	187.348			Agap3	186.48			Ttyh3	186.788
Vapa	187.295			Rbfox3	186.366			Selk	186.595
Snrnp200	187.242			Slc30a9	186.193			Aamp	186.427
Alcam	187.233			Gstm5	186.085			Rpl7a	186.41
Pdhb	187.203			Becn1	186.025			Habp4	186.333
Eif3h	186.615			Usp22	186.015			Sh3bp1	186.316
Trim32	186.585			Clcn4-2	185.798			Hspd1	186.155
Mast3	186.492			Psmc3	185.395			Nomo1	186.126
Tnk2	186.436			Ndufa9	185.335			Zfp106	185.743
Tial1	186.336			Speg	185.324			Mapk3	185.74
Clk4	186.332			Akap8	185.274			Ergic3	185.704
Neurl1a	186.124			Adora1	185.26			Nfasc	185.486
Zfp106	185.997			Psmc1	184.826			Stx12	185.479
Snn	185.92			Capns1	184.801			Cct4	185.426
Acox1	185.672			Actr1a	184.513			Nmt1	185.357
Mgrn1	185.201			Gsk3a	184.485			Herc3	185.254
Dync1li2	185.172			Bhlhb9	184.479			Sec14l1	185.227
Tm9sf3	184.99			Uhmk1	184.444			Ubr3	184.897
Adar	184.979			Agpat3	184.389			Tm9sf3	184.812
Noc2l	184.962			Mcf2l	184.342			Mgst3	184.586
Usp33	184.733			Lmo4	184.002			Clptm1	184.533
Guk1	184.671			Rxrg	183.563			Ppp1r9a	184.363
Herc3	184.255			Eid1	183.435			H3f3b	184.276
Elmo1	184.179			Tmsb10	183.386			Mat2a	184.273
Uqcrb	184.005			Maz	183.219			Dusp3	184.064
St8sia3	183.759			Rapgef4	183.201			Mbnl2	183.82
Agpat3	183.597			C1qtnf4	183.182			Ndufa5	183.213
Eri3	183.406			Smim14	183.077			Snx10	182.955
Cct6a	183.249			Stk16	183.075			Ubtf	182.909
Calb1	183.183			Inpp4a	182.937			Zmiz2	182.878
Cpne6	183.161			Zfp207	182.93			Usp11	182.786
Drosha	183.088			Nedd8	182.892			Map1lc3b	182.263
Aars	183.035			Hint1	182.846			Grin2b	182.039
Syt7	182.639			Syngr1	182.83			Ndufs1	181.92
Sort1	182.598			Gria3	182.803			Smg1	181.899
Acsl6	182.548			Adar	182.615			Cyth2	181.894
Eif3i	182.492			Stmn4	182.285			Ppp5c	181.841
Rnf157	182.401			Rps3	182.183			Tbc1d9b	181.746
Becn1	182.344			Dner	182.157			Abhd16a	181.668
Slc25a11	182.259			Eif3i	182.116			Gstm5	181.605
Scn1b	182.242			Clip4	182.004			Pcdh1	181.558
Git1	181.825			Clptm1l	181.971			Pomp	181.558
Slc2a3	181.802			Tesc	181.849			Ube2d3	181.528
Mfn2	181.681			Ywhaq	181.773			Eif3k	181.439
Ipo5	181.68			Aff4	181.503			Pum2	181.428
Tom1l2	181.591			Prmt1	181.499			Sept15	181.231
Rad23b	181.522			Eif5b	181.454			Cct3	181.231
Sik3	181.515			Dtx3	181.024			Large	181.203
Grin1os	181.436			Ssrp1	180.987			Ssb	180.806
Rabl6	181.325			Sptbn4	180.961			Vgf	180.696
Sept15	180.794			Lcmt1	180.795			Rbbp7	180.322
Ptma	180.685			March6	180.794			Ccnl2	180.233
Tspyl1	180.638			Adamts3	180.747			Rpn2	179.858
Prkcg	180.591			Hdac5	180.357			Wdr6	179.819
Hnrnpa3	180.484			Pkd1	180.308			Tnk2	179.64
Cadps	180.385			Syngap1	180.109			Tbr1	179.601
Map3k12	180.223			Ap1b1	180.004			Rad23b	179.587
Ubr3	180.178			Wdfy3	179.888			Dpp6	179.339
Set	180.149			Hdac2	179.853			8430419L09Rik	179.319
Cul1	180.006			Dcaf7	179.834			Suclg1	179.195
Ryr3	179.81			Tnik	179.748			Magee1	179.106
Eif3b	179.7			Dbp	179.707			Far1	179.026
Parp6	179.544			Pbx1	179.69			Gabra3	178.743
Tax1bp1	179.365			1700037H04Rik	179.615			Ndufa9	178.556
Atxn7l3b	179.311			Rpl10a	179.514			Becn1	178.29
Arf5	179.256			Syt7	179.511			Spred1	178.264
Tubb2b	179.245			Pafah1b2	179.103			Wdr7	178.181
Amfr	179.132			Cfap36	178.986			Rplp2	178.14
Gpr39	179.117			Gprasp2	178.896			Ndufa3	178.134
Trim28	179.009			Rragd	178.882			2210016L21Rik	178.09
Dpp10	178.884			Brwd1	178.82			Bcan	178.039
Vps35	178.631			Slc4a10	178.812			Slc25a12	177.968
Cnp	178.478			Efnb3	178.79			Ncan	177.924
Sh3gl2	178.413			Ube4b	178.72			Usp33	177.866
Spata13	178.314			Scn2a1	178.548			Strap	177.541
Psmd8	178.303			Eml2	178.387			Atp1b2	177.51
Ipo13	178.266			Ano3	178.32			Enpp2	177.464
Pgap1	178.263			Ddost	178.224			Ptk2	177.164
Eif4a1	178.168			Strbp	178.146			Eif1ax	176.607
Ssrp1	178.082			Rock2	178.044			Plcb1	176.451
Arrb1	178.015			Mapk9	177.926			Ak1	176.389
St13	178.005			Luc7l	177.788			Shisa4	176.259
Wbp5	177.786			Wnk1	177.787			Camta2	176.048
Syngap1	177.741			Srsf3	177.568			Eif3i	175.952
Ndufa5	177.725			Minos1	177.436			Ap3m2	175.905
Mtmr6	177.636			Qk	177.243			Ina	175.678
Hdlbp	177.553			Prepl	177.179			Cox7c	175.501
Pcbp1	177.476			Ndufa11	176.954			Prpf39	175.447
Eif3e	177.364			Hagh	176.935			Cbx5	175.199
Ndufb10	177.344			Psmb6	176.825			Tprgl	175.195
Vdac3	176.884			Ftl1	176.565			Ssbp4	175.143
Pomp	176.818			Acly	176.518			Supt6	174.998
Fto	176.754			Thoc1	176.403			Sulf2	174.944
Elp2	176.645			Negr1	176.339			Ppp1r1a	174.932
Tmem106b	176.412			Kazn	176.31			B3gat3	174.902
Clcn4-2	176.372			Creld1	176.236			Os9	174.696
Txndc5	176.189			Mff	176.157			Rpl36a	174.511
Camsap2	176.094			Tmem179	176.045			Ppp2ca	174.432
Trim9	176.016			Gabrg2	176.017			Arhgap21	174.337
Xpr1	175.966			Gnl3l	175.851			Myt1l	174.083
Megf8	175.838			Psma7	175.766			Maz	174.08
Npepps	175.619			Uqcc2	175.731			Ppp2r5b	173.985
Tceal3	175.532			Ap1s2	175.595			Sbno1	173.949
Actr10	175.528			Rpl15	175.535			Sgta	173.918
Atrx	175.374			Cdk5r2	175.298			Stx7	173.877
Ndufa6	175.332			Prdx1	174.956			Sccpdh	173.78
Stk16	175.282			Jmjd8	174.938			Tm9sf2	173.65
Smarca4	175.201			Psmd3	174.711			Cttnbp2	173.513
Psmb6	175.11			Trim32	174.692			Tspyl1	173.479
Ndufb11	175.092			Pomp	174.632			Csnk1g2	173.314
Lztr1	174.937			Rgs2	174.627			Rabgap1l	173.264
Psmc6	174.81			D17Wsu92e	174.563			Sdc3	173.144
Chd3os	174.693			Enc1	174.546			Ppp2cb	173.101
Tprgl	174.593			Apc	174.54			Gabarap	173.082
Psma6	174.161			Ubr3	174.505			Slc3a2	173.033
Psma7	173.994			Lztr1	174.478			Azin1	173.001
Cdk14	173.96			Coro2b	174.453			Zfand5	172.646
Spop	173.942			Vps29	174.37			Trpc4ap	172.514
Ivns1abp	173.899			Carhsp1	174.277			Ppp2r2b	172.492
Srsf6	173.829			Mgll	174.182			Trnp1	172.45
Aatk	173.721			Ktn1	174.146			Efr3a	172.215
Palm	173.631			Snn	174.064			Pnck	171.987
Qk	173.463			Crtc1	173.768			Guk1	171.89
Immt	173.457			Mpnd	173.683			C2cd2l	171.873
Arhgap26	173.455			Vapa	173.621			Celf1	171.756
Rasal1	173.12			Ctsa	173.503			Rasal1	171.705
Nalcn	173.062			Ppip5k1	173.356			Tnik	171.679
Sbno1	172.991			Ccni	173.348			Cope	171.67
Napg	172.934			Atcay	173.345			Jmjd8	171.377
Gramd1a	172.899			Ndufs8	173.29			Srsf7	171.374
Lmtk3	172.824			Ndufa10	173.117			Zmym3	171.342
Brk1	172.72			Srgap3	173.016			Klhdc2	171.337
B4galt6	172.704			Dync1li2	172.985			Trim3	171.285
Drap1	172.676			Tspyl1	172.863			Pdhb	171.114
Snx27	172.648			Nars	172.835			Apba2	170.997
Setd3	172.288			Ddx24	172.805			Ubr5	170.991
Cpd	172.238			Nrcam	172.64			Gramd1a	170.983
Ssbp2	171.992			Rbfox2	172.03			Eif3f	170.882
Tubb4b	171.953			Eprs	171.832			Sez6l	170.848
Gria3	171.913			Sncb	171.757			Hars	170.7
Acat1	171.748			Ap3b2	171.722			Acly	170.455
Hmgcs1	171.723			Phactr3	171.706			Actn4	170.233
Cacnb3	171.627			Cnot7	171.622			Smarca4	170.231
Dlgap1	171.62			Cbx5	171.609			Uqcrq	170.164
Tuba1b	171.456			Rtcb	171.453			Psmd8	169.965
Nefl	171.448			Atp13a2	171.326			Cnp	169.684
Apc	171.441			Chka	171.012			Acox1	169.515
Tmem35	171.418			Dynlrb1	170.97			Mfn2	169.462
Acvr2a	171.387			Sh3bp1	170.933			Tmem50a	169.394
Zfp207	171.378			Reps2	170.928			Pitpnm2	169.375
Ola1	171.207			Cdc37	170.894			Mpp2	169.244
Cab39	170.864			Gabrd	170.608			Ptn	168.966
Arl8a	170.502			Sept8	170.525			Msl1	168.893
Man2a2	170.45			Srsf2	170.512			Aatk	168.871
Crtc1	169.993			Prpf38b	170.509			Ntm	168.864
Syngr3	169.98			Tm9sf3	170.262			Ubqln1	168.849
Cpne2	169.956			Cope	170.228			Eri3	168.747
Scn3b	169.848			Gabarap	170.223			Rtcb	168.542
Chd4	169.539			Lrrc40	170.197			Kcnj9	168.429
Dld	169.521			Sik3	169.97			Syngap1	168.381
Ppap2b	169.4			Iqsec1	169.871			Epb4.1l3	168.319
Ssr3	169.1			Pcmtd1	169.82			Lgmn	168.115
Nat8l	169.081			Smdt1	169.613			Mgll	168.052
Psma2	168.972			Rgs4	169.275			Clcn3	167.989
Madd	168.867			Itpka	169.275			Psma7	167.951
Klhdc3	168.849			Ssbp2	169.234			Med24	167.907
Vps26b	168.74			Ptbp2	169.118			Tmem151b	167.764
Amph	168.646			Nudc	169.103			Xpo1	167.667
Uqcrq	168.48			Psma3	169.086			Celsr2	167.641
Cmas	168.368			Rbbp7	169.01			Npepps	167.536
Cpt1c	168.303			Cab39	168.941			Rps16	167.477
Erp29	168.291			Ipo13	168.54			Cfap36	167.297
Rrp7a	168.12			Ddx26b	168.405			Pcbp4	167.222
Gripap1	168.107			Snx3	168.283			Acap3	167.221
Brd2	168.043			Zfp106	168.104			Nap1l4	167.145
Psmd1	167.966			Ubtf	167.887			Eml5	167.128
Limk2	167.881			Psme4	167.829			Fbxo11	167.087
Ctsa	167.849			Ypel2	167.818			Psmd3	167.083
Khdrbs1	167.627			Hnrnpd	167.284			Adar	167.072
Rpl35	167.614			Zdhhc17	167.264			Atp11b	166.986
Gm26582	167.39			Ccnt2	167.236			Tnpo2	166.957
Rab3gap2	166.811			Pde8b	167.151			2510003E04Rik	166.827
Rab15	166.65			Ahsa1	167.009			Hspa12a	166.815
Rabep1	166.573			Pds5b	166.983			Rpl15	166.738
Ppid	166.532			L1cam	166.735			Trp53bp1	166.658
Kctd13	166.396			Slc25a12	166.675			Fkbp4	166.576
Ppp2r2b	166.39			Jph3	166.629			Nmnat2	166.571
Cdc42se2	166.2			Ndufb8	166.548			Clk4	166.539
Frrs1l	166.12			Mobp	166.448			Col6a1	166.426
Maz	166.03			Dzip1	166.435			Ppp2r5c	166.336
Pak3	165.96			Atxn7l3b	166.401			Elp2	166.323
Gabrg2	165.85			Ftx	166.333			Psma2	165.827
Sar1a	165.757			Mkrn1	166.194			Wdr47	165.806
Dlg1	165.546			Ncan	166.182			Akap8l	165.785
Tnks2	165.481			Zfml	166.029			Clptm1l	165.692
Rcn2	165.412			Tspyl2	165.982			Vdac3	165.689
Slc9a6	165.176			Rap1gds1	165.758			Tmem38a	165.525
Nmnat2	165.161			Plekhb1	165.738			Mapk8	165.416
Pcdh1	165.018			Kalrn	165.722			Fut9	165.2
Asrgl1	164.771			Strn3	165.686			Brd2	165.17
Rab1b	164.758			Lsamp	165.651			Cops7a	165.136
Slc15a3	164.709			Vstm2l	165.612			Bmpr2	164.97
Selt	164.587			Ganab	165.535			Mturn	164.958
Chchd10	164.522			Tomm7	165.526			Prickle2	164.956
Dbi	164.517			Strap	165.482			Mt1	164.621
Tomm34	164.347			Pcbp1	165.48			Lzts3	164.619
Fads1	164.304			Hdgfrp2	165.449			Bend6	164.505
Itpr1	164.229			Rasgrp2	165.445			Tia1	164.459
Strip2	164.117			Spop	165.394			Fdft1	164.403
Fam120a	164.109			Myo9a	165.238			Tsc2	164.173
Cops2	164.05			Ccnl1	165.114			Fam219a	164.158
Fbxo21	163.89			Usp33	165.079			Ndufa11	164.157
AI314180	163.886			Tnrc6a	165.008			Actr10	164.12
Selk	163.624			Gltscr2	164.743			Cul3	164.045
Ckap5	163.611			Atp6v0c	164.693			Mcf2l	163.994
Nmt1	163.508			Shisa9	164.653			St13	163.948
Pisd-ps1	163.315			Trim2	164.499			Nbr1	163.843
Dync1i1	163.279			Lmo3	164.487			Ice1	163.719
Ybx1	163.1			Tanc2	164.467			Hdlbp	163.505
Lzts1	163.052			Abhd16a	164.064			Thoc1	163.349
Tgoln1	163.031			Slc4a4	163.908			Dynlt3	163.347
Snx3	162.983			Elp2	163.751			Psmc4	163.294
Smim13	162.982			Eif3b	163.674			Ncor1	163.063
Psma3	162.904			Rhob	163.6			Dzip1	163.036
Cacnb4	162.853			Hdlbp	163.48			Nov	163.031
Ubtf	162.78			Dpy19l1	163.364			Ndufb8	162.999
Ndufa2	162.435			Prrt1	163.182			Btf3	162.475
Gtf3c1	162.383			Mark1	163.112			Rabl6	162.386
Ppp1r12c	162.349			Psmc4	162.907			Alcam	162.174
Dock3	162.327			Pam	162.867			Nudcd3	161.903
Ccnl2	162.291			Rgs7bp	162.788			Ppa1	161.901
Hdgfrp3	162.246			Elmo1	162.652			Hdac2	161.889
Uqcc2	162.231			Aars	162.445			Hspa4l	161.768
Gabarap	162.172			Slc15a3	162.382			Cnksr2	161.718
Eftud2	162.147			Spryd3	162.371			Ipo9	161.697
Tpr	162.141			Opa1	162.237			Noc2l	161.546
Ganab	161.872			Agpat1	162.183			Ptprn2	161.427
Arl6ip5	161.85			Nrxn1	162.144			L1cam	161.388
Ppfia2	161.674			Ptp4a2	162.097			Polr2g	161.302
Ap3m2	161.642			Zer1	161.985			Cul1	161.299
Top2b	161.597			Rmnd5a	161.938			Chrm1	161.263
Wdr47	161.485			Rnf220	161.851			Atrn	161.073
Braf	161.054			Zfand5	161.735			Hap1	160.95
Eif5b	161.046			Ndufs3	161.729			Npy	160.741
Ankrd17	160.81			Fbxo11	161.684			Fam131b	160.685
Efnb3	160.757			Fhl1	161.667			AI593442	160.627
Atxn7l3	160.683			Myef2	161.642			Snn	160.58
Ndufs7	160.635			Msl1	161.626			Mras	160.559
Rps28	160.571			Rab3gap2	161.42			Fam163b	160.309
Akt1	160.542			Guk1	161.371			Psmc6	160.161
Sh2d5	160.322			Eftud2	161.292			Hnrnpab	160.152
Rragb	160.276			Arhgef4	161.099			D430041D05Rik	160.117
Wnk1	160.216			Mbnl1	161.097			Pabpc1	159.865
P4hb	160.18			Fam193b	161.039			Rbx1	159.844
Sowaha	160.063			Ypel3	161.017			Srsf6	159.805
Dap3	159.956			Edf1	161.013			Vopp1	159.733
Klhdc10	159.953			Papola	160.938			Kpnb1	159.481
Bmpr2	159.903			Raf1	160.926			Tceb1	159.44
Spin1	159.893			Klhdc3	160.921			Galnt9	159.371
Mtss1l	159.612			Psmd8	160.793			Qk	159.346
Jph3	159.584			Npepps	160.754			Atf4	159.066
Chmp2a	159.564			Acsl3	160.718			9530082P21Rik	159.062
Minos1	159.54			Slc8a2	160.51			Lmbrd1	158.923
Gja1	159.504			Ppib	160.462			Rbfox3	158.907
Ppp1r2	159.317			Znrf1	160.35			Mat2b	158.9
Nub1	159.289			Brd2	160.278			Zc3h7b	158.855
Ncor1	158.902			Ipo9	160.185			Psmd4	158.751
Dgkb	158.87			Tax1bp1	160.132			Asap1	158.624
Wsb1	158.778			Rpl35	159.878			Cyhr1	158.538
Ndufa11	158.698			Smpd3	159.717			Amfr	158.452
Camk2g	158.677			R3hdm2	159.56			Pcbp1	158.314
Lrpprc	158.605			Vldlr	159.488			Arhgap26	158.279
Ipo9	158.477			Nucks1	159.452			Bscl2	158.049
Cops7a	158.428			2700089E24Rik	159.424			Rabep1	158.019
Fem1b	158.222			Nmt1	159.393			Edf1	157.941
Eif1b	158.214			Tm9sf2	159.13			Ogfrl1	157.93
Srgap3	158.107			Actn1	159.112			Bap1	157.789
Pls3	157.99			Mmd2	159.033			Rps3	157.698
Copg2	157.983			Arhgef2	158.862			AI314180	157.615
Epm2aip1	157.958			Fbxw7	158.713			Hras	157.386
Dgkz	157.852			Arf4	158.644			Pgbd5	157.256
Cops6	157.786			Dld	158.535			Nmt2	157.127
Lhfpl4	157.774			Blcap	158.484			Hdgfrp3	157.01
Myt1l	157.584			Psma6	158.417			Snrnp200	156.97
Psmd6	157.376			Madd	158.236			Dld	156.796
Hras	157.361			Klhl13	158.012			Rps26	156.795
Clcn3	157.304			Gabra4	157.85			Hagh	156.75
Arhgef4	157.212			Nsd1	157.767			Fdps	156.734
Bhlhb9	157.197			Ubqln1	157.721			Ralgapa1	156.709
Sgta	157.184			Trim35	157.718			Kcnip3	156.634
Ttll7	156.99			Plcl2	157.675			Rab1b	156.388
Ppa1	156.922			Arhgap26	157.553			Ndufb11	156.363
Syt4	156.865			Chd5	157.42			Psma6	156.35
Sf3b3	156.842			Tom1l2	157.328			Vps29	156.278
Rpl27	156.804			Tkt	157.292			Ndufa2	156.196
Epha4	156.686			Gnptg	157.247			Mrfap1	156.191
Cdk5r2	156.61			Shank3	157.012			Calb1	156.181
Psma4	156.494			Nomo1	156.816			Brsk2	156.179
Cttn	156.465			Jakmip1	156.552			Selt	156.021
Fxr2	156.449			Fkbp4	156.441			Immt	155.764
Gnb2l1	156.365			Dennd6b	156.344			Psmb6	155.748
Nudcd3	156.351			Arl3	156.265			Cops6	155.691
Celf3	156.307			Tceal3	156.263			Suds3	155.671
Zdhhc17	156.15			Arhgap21	156.104			Stau2	155.559
Slc8a2	156.1			Rcan2	156.045			Efr3b	155.484
Psmd4	156.026			Pttg1ip	156.012			St8sia3	155.227
Ddc	156.025			Taok1	155.939			Sar1a	155.076
A830012C17Rik	155.978			1110051M20Rik	155.889			Fem1b	154.932
Psmd3	155.959			Tprgl	155.822			Arl6ip5	154.8
Fbxo11	155.89			Sgip1	155.8			Ppip5k1	154.629
Hyou1	155.836			Rheb	155.661			Prelid1	154.587
Rgl1	155.762			Vdac3	155.598			Trrap	154.559
Ano3	155.67			Lrrn3	155.583			Ndufa6	154.496
Map7d2	155.6			Gars	155.418			Erp29	154.476
Fbxw7	155.409			Vat1l	155.332			Lpcat4	154.348
Prrc2c	155.254			Nova1	155.297			Ppid	154.345
Wdr7	155.045			Sv2b	155.222			Ubp1	154.176
Hagh	155.031			Enah	155.189			Bclaf1	154.163
Glg1	154.706			Slc25a11	155.13			Acsl3	154.124
Wdr82	154.62			Ubxn6	155.105			Birc6	154.072
Lin7a	154.459			Nrxn2	155.089			Psma3	154.045
Glrb	154.377			Psma2	155.005			Eif1b	154.04
Cul3	154.337			Git1	154.785			A830039N20Rik	153.975
Psma1	154.244			Tnks2	154.762			Ctnna2	153.806
Atp5e	154.018			Dynlt3	154.695			Lypd1	153.741
Arhgef7	154.008			Ankrd17	154.57			Ndufb10	153.526
Cep170b	153.868			Cyhr1	154.523			Negr1	153.51
Actg1	153.804			Traip	154.319			Grm5	153.42
Por	153.745			Ptprz1	154.2			Spire1	153.365
Thoc1	153.533			Sgta	154.181			U2af2	153.345
Eml5	153.387			Rpl27	154.138			Tanc2	153.331
Rbfox3	153.374			Rabep1	154.092			Rpl18	153.142
Oaz2	153.351			Cstf2	153.967			Ppp1r37	153.106
Tomm7	153.169			8430419L09Rik	153.957			Cacybp	153.029
Abhd16a	153.162			Ppp2r2a	153.944			Dner	152.985
Zfand5	153.154			Kcnh3	153.912			Chmp2a	152.925
Epb4.1l4b	153.089			Rbbp6	153.825			Scn3b	152.659
Bcat1	153.075			Ggnbp2	153.817			Trim28	152.589
Flywch1	153.049			Sst	153.805			Brinp1	152.535
Arglu1	152.542			Prickle2	153.694			Gnal	152.529
Arhgap35	152.43			Selt	153.665			Hnrnpm	152.347
Bag1	152.424			Rpl22	153.586			Smim14	152.295
Mal2	152.403			Eri3	153.548			Rims3	152.247
Ube2q1	152.345			Ttc7b	153.535			Kpna1	152.11
Cycs	152.165			Atp1b2	153.417			Eif3h	151.965
Srsf3	152.116			Pcmt1	153.292			Rps2	151.877
Ppp1r12b	152.059			Ankrd11	153.222			Ddost	151.841
Far1	151.889			Map1lc3a	153.159			Fam65a	151.762
Dctn3	151.843			Hnrnpa0	152.988			Uqcrb	151.653
Opa1	151.838			Anxa6	152.908			Picalm	151.626
Polr2g	151.576			Ppid	152.803			Rpl34	151.606
Cstf2	151.52			Rpl39	152.737			Slc9a6	151.555
Zmiz2	151.512			Erp29	152.733			Pip4k2c	151.468
Ankrd63	151.497			Usp19	152.717			Lamp5	151.377
Picalm	151.479			Ppp2r5c	152.645			Cct6a	151.317
Agrn	151.248			Dnmt3a	152.466			Plekhb1	151.225
Tnik	151.246			Zmiz2	152.397			B3gat2	151.106
Kif5b	151.236			Glyr1	152.259			Luc7l2	151.103
Ets2	151.114			Actr10	152.254			Ptbp2	151.014
Spred1	151.093			Uqcrfs1	151.898			Cpt1c	150.699
Csnk1d	150.793			Zc3h7b	151.763			Ipcef1	150.651
Map1lc3a	150.658			Abca3	151.755			Ndufs7	150.542
Ptn	150.652			Cmip	151.566			Cand1	150.493
9530082P21Rik	150.453			Uqcr10	151.402			1110051M20Rik	150.437
Cfdp1	150.45			Rbx1	151.381			Doc2a	150.344
Riok3	150.415			Ddx6	151.293			Chp1	150.277
Rab5c	150.391			Aldh5a1	151.257			Atp6v1f	150.267
Rab11a	150.234			Xpr1	151.201			Set	150.262
Rgs17	150.081			Fras1	151.175			Qdpr	150.248
Mtch2	150.003			Clcn3	150.893			Uqcrfs1	149.936
Ocrl	149.999			Fam102b	150.75			Top2b	149.816
Ggnbp2	149.928			Ncor1	150.687			Taok1	149.795
Dhx9	149.919			Prrc2c	150.61			Megf8	149.781
Ylpm1	149.667			Peg10	150.451			Mtch2	149.736
Ndufs8	149.613			Sympk	150.226			Atp5e	149.563
Klhdc2	149.612			Hdgf	150.203			Rpl10	149.507
Hnrnpd	149.52			Dgkd	150.163			Ckap5	149.367
Ypel3	149.498			Cnp	150.13			Hdgf	148.936
Taok1	149.362			Epn2	150.067			Kctd13	148.922
Inpp4a	149.315			Fkbp2	150.061			Sel1l	148.873
Chtop	149.314			Gpr158	149.995			Rpl10a	148.838
Nsfl1c	149.156			Kif3c	149.98			Cdc42se2	148.747
Fry	149.132			Hnrnpa3	149.921			Mtmr6	148.722
Dapk1	149.047			Akt1	149.902			Gramd1b	148.657
Psmc4	149.001			Drap1	149.798			Snx3	148.651
Mtor	148.999			Gja1	149.793			Ggt7	148.602
Gpr37l1	148.999			Selk	149.79			Aff4	148.547
Mmd	148.995			Rps28	149.742			Wdfy3	148.492
Myef2	148.961			Lrpprc	149.693			Ssrp1	148.422
Rab3gap1	148.863			Kpnb1	149.621			Golga7b	148.41
Stk32c	148.746			Map2k4	149.584			Ppib	148.403
Rbx1	148.617			Cdk16	149.575			Ppm1a	148.197
Cyhr1	148.614			Gm23134	149.548			Txnl1	148.155
Sf1	148.585			Trpc4ap	149.449			Nucks1	148.139
Cacybp	148.49			Cadm4	149.421			Emc4	148.111
Rph3a	148.327			Lzts1	149.401			Tollip	148.025
Rhob	148.263			Eif3e	149.376			Rab11a	147.978
Appl1	148.222			Mrps25	149.183			Ggnbp2	147.831
Ubl3	148.116			Syngr3	148.984			Rpl23a	147.784
Lgmn	148.111			Lppr2	148.882			Ubqln4	147.757
Ptpn11	148.016			Pptc7	148.808			Nudt4	147.735
D7Ertd715e	147.858			Nfasc	148.808			Safb	147.691
Baz1b	147.84			Mfn2	148.657			Myo18a	147.626
Pygb	147.813			Lonrf2	148.613			Ctsa	147.473
Zc3h7b	147.794			Mtf2	148.594			Neurod6	147.439
Tmem50a	147.745			Gpcpd1	148.511			Vps26b	147.217
Gps1	147.701			Htr2c	148.393			Txn1	147.107
Srebf2	147.64			Tmcc2	148.383			Grin1os	146.835
Ecel1	147.64			Azin1	148.377			Reep2	146.598
Clip1	147.61			Med24	148.353			Rapgefl1	146.594
Eprs	147.602			Limk2	148.197			Nedd4l	146.542
Epb4.1l3	147.517			Wdr82	148.112			Marf1	146.529
Nkiras1	147.451			Tbc1d9b	148.059			Myo9a	146.488
Copb2	147.295			Gtf2f1	147.98			Tmem179	146.475
Hdgf	147.092			Sin3b	147.908			Cmas	146.459
Trio	147.007			Polr2g	147.848			Slc30a3	146.364
Fam49a	146.957			2210016L21Rik	147.836			Aktip	146.361
Hspa12a	146.917			Lsm14b	147.812			B4galt6	146.349
Fam107a	146.849			Itgb1bp1	147.698			Kcnt1	146.325
Snx1	146.736			Acox1	147.598			Reep1	146.233
Vamp4	146.726			Ralgapa1	147.595			Lonrf2	146.123
Dnajc8	146.698			Snx27	147.575			Zyg11b	146.075
Rock2	146.639			Tbc1d8	147.319			Ube2n	146.023
Luc7l	146.524			Glrb	147.209			Rufy2	145.976
M6pr	146.456			Setd3	146.98			Clip1	145.94
Spock1	146.319			Lppr3	146.952			Spon1	145.796
Luc7l2	146.315			Chrm1	146.865			Setd3	145.517
Prpf39	146.311			Gpr37l1	146.766			Fam120a	145.506
Kcnab1	146.244			Cacnb1	146.74			Uqcr10	145.427
Bap1	146.187			Crmp1	146.721			Gtf2f1	145.374
Ppp2cb	146.066			Pfn1	146.682			Adrbk2	145.356
Kif3a	146.047			Sun1	146.572			Fgf12	145.191
Fubp1	146.023			Rpl12	146.545			Camkk1	145.175
Nipsnap1	145.95			Tmem106b	146.413			Tpm3	145.115
Gm27031	145.924			Rab1b	146.398			Opa1	145.032
Cdipt	145.906			Gpatch8	146.091			St3gal5	144.997
Ktn1	145.825			Sgsm1	146.085			Psma1	144.753
Klhl7	145.796			Gm996	146.078			Agpat1	144.712
Kpna1	145.724			Nkiras1	146.043			Actg1	144.673
Hspa4l	145.526			Zswim8	145.904			Nr4a1	144.563
Vps29	145.454			Dctn3	145.861			Mib2	144.407
Snd1	145.39			Acat1	145.797			Jph3	144.352
Ttc7b	145.019			Ssr3	145.757			Prdx6	144.097
Uba2	144.927			Ptpn11	145.714			Eif3b	143.913
Msl1	144.686			Olfm3	145.632			Rps20	143.873
Pcm1	144.639			Gnai2	145.607			Cttn	143.866
Bscl2	144.634			Taf10	145.562			Sgsm1	143.774
Ppp2r5c	144.52			Mllt6	145.556			Gripap1	143.74
Mcf2l	144.421			Set	145.5			Ptgds	143.587
Gm23134	144.415			Ist1	145.493			Minos1	143.557
Pdpk1	144.358			Ndufs6	145.487			Mkrn1	143.502
Ip6k2	144.29			Tceb1	145.477			Usp46	143.295
Ddx6	144.274			Rab40b	145.353			Slc27a4	143.264
Arhgap21	144.244			Ankrd10	145.32			Ndufa8	143.144
Grb10	144.223			6430548M08Rik	145.236			Wasl	143.093
Pip4k2b	144.163			Sdhc	145.14			Tbcb	142.856
Ppp5c	144.161			Nr1d2	145.081			Nlk	142.726
Cd99l2	144.017			Safb2	144.985			Csnk2b	142.685
Hexb	143.951			Synpr	144.889			Chtop	142.593
Tnpo2	143.79			Riok3	144.837			Map6	142.559
Lamp5	143.769			Ranbp2	144.749			Apba1	142.516
Klhl13	143.738			Rgs17	144.721			Cstf2	142.411
Cacnb1	143.655			Ndufa8	144.658			Usp48	142.376
Cacna2d1	143.594			Htra1	144.649			Ncaph2	142.153
Chrm1	143.459			Chst2	144.567			Rprm	142.007
Agpat1	143.456			Vsnl1	144.532			Tmed9	141.835
Edf1	143.426			Immt	144.531			Ly6e	141.772
Strn3	143.351			Ppme1	144.361			Ndufs3	141.685
Csnk1g2	143.186			Psmd4	144.208			Ndufs8	141.678
Brwd1	143.157			Gm26702	144.18			Gps1	141.652
Sin3b	143.056			Pdpk1	144.077			Nktr	141.564
Ndufs3	143.034			Cdc42se2	143.955			Susd4	141.378
Ahsa2	142.954			Vps26b	143.936			Creg2	141.371
Atrn	142.904			Map2k2	143.934			Sphkap	141.313
Prps1	142.76			Ints1	143.831			Sept4	141.253
Srsf2	142.755			Chga	143.727			Usp19	141.202
Rpl39	142.667			Gstp1	143.65			Epha4	141.198
Nol6	142.433			Epb4.1l3	143.592			Gnaq	141.175
Eif3d	142.336			Magee1	143.561			Spin1	140.952
Spock3	142.236			Nat8l	143.542			Vps4a	140.952
Cyb561	142.17			Itsn1	143.521			Ei24	140.922
Mkrn1	142.062			Khdrbs1	143.456			Gsk3b	140.689
Cope	142.058			Psma1	143.401			Brwd1	140.649
Mmd2	142.051			Nalcn	143.395			Hid1	140.603
Adora2a	141.98			Usp14	143.157			Rab24	140.491
Coro2b	141.945			Fscn1	143.069			Ola1	140.298
Enah	141.944			Dap3	143.058			Arhgap35	140.247
Atp6v1f	141.922			Bap1	142.984			Eif5b	140.221
Vapb	141.849			Dtnb	142.982			Rhob	140.159
Ube2ql1	141.845			P4htm	142.832			Sfxn3	140.155
Papola	141.754			Chd3os	142.744			Prmt1	140.139
Plxna2	141.591			Stard10	142.698			Ndfip2	140.033
Man1a2	141.59			Epb4.1	142.603			Abca3	140.024
Sun1	141.561			Pcm1	142.592			Abhd17a	140.008
Adap1	141.5			Bscl2	142.586			Got2	140.002
Psmd14	141.487			Cul1	142.475			Rgs7bp	139.962
Actl6b	141.464			Prkcsh	142.326			Arhgap44	139.961
Jmjd8	141.435			Fam107a	142.29			Lcmt1	139.914
Ppm1a	141.311			Rsrc2	142.158			Hnrnpa3	139.853
Yars	141.215			Ank	142.15			Wipi2	139.814
Pcbp4	141.159			Eif4a1	141.996			Sh3bgrl3	139.789
Ccdc47	141.119			Fxr2	141.881			Pfdn2	139.745
Ncbp1	141.063			Kcnq5	141.83			Tmem63b	139.696
Wipi2	140.947			Smarcd1	141.827			Gnb2l1	139.595
Lrrc4b	140.931			Mbtps1	141.655			Ankrd17	139.586
Ipo4	140.904			Pde4dip	141.65			Olfm2	139.499
Eif3m	140.72			Eif3a	141.565			Mib1	139.48
Gtf2f1	140.666			Prkcg	141.509			Chka	139.47
Dzip3	140.641			Reep2	141.469			Psma4	139.454
Ube2o	140.565			Ppp2ca	141.392			Arhgap33	139.442
Arl3	140.461			Smg5	141.312			Slc48a1	139.335
Ogfod1	140.43			Lrp11	141.249			Sae1	139.26
Slc25a14	140.4			Rab24	141.205			Ablim2	139.252
Stard7	140.368			Hmgcs1	141.192			Pde1b	139.238
Gnai1	140.364			B3galt5	141.026			Htt	139.163
Celsr2	140.232			Zmynd8	141.017			Mef2a	139.162
Iqsec1	140.164			Hspa4l	140.993			BC031181	139.1
Dnm3	139.9			Cdipt	140.957			Dtx3	138.996
Hook1	139.847			B4galt6	140.939			Eftud2	138.909
Stx7	139.838			Cops7a	140.893			Ahsa2	138.892
Fyn	139.699			Cops6	140.728			Ktn1	138.888
Cdk16	139.667			Pmpca	140.714			Tnks2	138.862
Ralgapa1	139.61			Amy1	140.629			Hdac3	138.793
Txndc16	139.539			9530082P21Rik	140.602			Dock9	138.664
Zfml	139.484			Col11a1	140.538			Acsl5	138.593
Ice1	139.365			Gpr162	140.487			Sgip1	138.577
Grsf1	139.307			Pip5k1c	140.404			Hn1	138.463
Prelid1	139.182			Taldo1	140.302			Epm2aip1	138.416
Pbx1	139.038			Ctnnd2	140.254			Rims1	138.384
2510003E04Rik	138.965			Myo18a	140.249			Camsap2	138.361
Lrp11	138.923			Cops2	140.229			Acat1	138.292
Rpl22	138.866			Mras	140.191			Adam11	138.258
Yme1l1	138.831			Agtpbp1	140.132			Fto	138.233
Arf4	138.803			Spred1	140.063			Wdr82	138.129
P4htm	138.742			Leng8	140.032			Bace1	138.009
Pip5k1c	138.648			Tpr	139.923			Akap6	137.841
Snx10	138.58			Braf	139.906			Mrps25	137.761
Lrrc49	138.472			Olfm1	139.878			Phactr3	137.655
Rab18	138.466			P4hb	139.866			Eif3a	137.632
Agtpbp1	138.413			Ptn	139.796			Hdgfrp2	137.556
Psmd7	138.401			Acin1	139.789			Brd9	137.452
Nono	138.314			Rbm6	139.669			Hspbp1	137.441
Tmx2	138.302			Ramp1	139.614			Abat	137.325
Rab10	138.212			Ylpm1	139.605			Tfrc	137.189
Mdn1	138.197			Mboat7	139.526			Satb1	137.158
Mrps25	138.156			Oaz2	139.352			Elmo2	137.003
Lpgat1	138.138			Ppp2cb	139.307			Nipsnap1	136.871
Acsbg1	137.894			Nap1l4	139.268			Rab3gap2	136.733
Vps39	137.82			Psmd6	139.213			Mtss1l	136.711
Sae1	137.815			Mtor	139.18			Vapb	136.696
Bai3	137.713			Acsbg1	139.026			Grb2	136.642
Ypel5	137.609			Prelid1	138.627			Fxr2	136.584
Spcs2	137.49			Sowaha	138.554			Pgam1	136.556
Arhgap32	137.458			Ccar2	138.506			Ube2k	136.551
Ctnna2	137.295			Napg	138.503			Eif3e	136.533
Gna11	137.262			Ralgapb	138.168			Zc3h15	136.407
Taok2	137.196			Slk	138.11			Rpl22	136.401
Pde4dip	137.178			Asph	138.082			Wsb1	136.362
Dusp26	137.173			Srcin1	138.077			Eif4a1	136.286
Grin2b	137.173			Mbd3	138.023			Resp18	136.263
Cops3	137.132			Atxn7l3	137.932			Synpr	136.261
Ubp1	137.013			Kcnd2	137.791			Cops5	136.237
Aktip	136.999			Tbce	137.734			Cfdp1	136.148
Sirt2	136.994			Vps35	137.629			Sparc	136.141
Zyg11b	136.976			Cycs	137.591			Cmpk1	136.09
Slc4a3	136.868			Stag1	137.568			Fkbp2	136.088
Dlk1	136.719			9430020K01Rik	137.504			Sumo3	136.084
Sbf1	136.681			Cul3	137.446			Srsf3	136.074
Anapc4	136.652			Stx12	137.413			Kmt2a	136.032
Etv5	136.49			Nefm	137.319			Nsfl1c	135.963
Fbxo18	136.472			Lin7a	137.309			Ankrd11	135.959
Qdpr	136.401			Asrgl1	137.223			Ablim1	135.913
Safb	136.396			Mt2	137.218			Mgat3	135.875
Ube2n	136.208			Eif1b	137.1			Rab5c	135.841
Nfx1	136.173			Dusp8	137.092			Dalrd3	135.623
Psme4	136.17			Mtss1l	136.93			Adam23	135.618
Tmem178b	136.123			Hdac3	136.875			Arhgef7	135.583
Srrt	136.093			Scap	136.867			Fbxo9	135.56
Tanc2	136.09			Fto	136.793			Ptma	135.506
Ppfia3	136.029			Hivep2	136.648			Zfp207	135.374
Copz1	136.024			Nudcd3	136.617			Akt1	135.347
Ube4b	135.991			Ppap2b	136.507			Snx32	135.324
Camk1d	135.939			Mtmr6	136.501			Kcnmb4	135.315
Myo5b	135.603			Dhx36	136.487			Pdzd4	135.222
Ptp4a2	135.596			Homer1	136.433			Pik3r2	135.138
Pfn1	135.509			Cyth2	136.41			Map7d2	135.075
Fam102a	135.49			Sar1a	136.382			Psmd14	134.997
Mib2	135.388			Mtch2	136.334			Mpnd	134.888
Hnrnpa0	135.309			Sdc3	136.257			Pin1	134.865
Vps4a	135.289			Arhgef7	136.233			Kcna6	134.722
Zdbf2	135.224			Dusp11	136.105			Btbd10	134.701
Pde8b	135.19			Wdr17	136.101			Hlf	134.566
Socs5	135.175			Cnot1	136.068			Bnip3l	134.51
Ctnnd2	135.166			Rbm10	136.053			Shisa7	134.358
Fbxo41	135.138			Bai3	136.051			Tgoln1	134.275
Ncaph2	135.095			5031439G07Rik	136.042			Rpl35	134.226
Gstp1	135.085			Psmd14	135.997			Asns	134.048
Smpd3	135.051			Pkp4	135.976			Kras	134.035
Zc3h14	135.026			Map1lc3b	135.803			Slc25a11	134.028
Cnot7	134.91			Csnk1g2	135.774			Cyld	133.917
Opcml	134.901			Sacs	135.744			Arhgef17	133.557
Cisd1	134.899			Ubxn1	135.744			Dap3	133.263
Gnptg	134.898			Chmp3	135.703			Srrt	133.263
Pmpca	134.893			Cand1	135.695			Dact3	133.147
Asns	134.845			Hexb	135.662			Ube2o	133.052
Metap2	134.813			Hook1	135.563			Crtc1	132.965
Tmed9	134.765			Tbc1d20	135.552			Cacnb1	132.893
Prkcsh	134.755			Ndufs4	135.381			Emc7	132.878
Meaf6	134.748			Gba2	135.319			Arfgap1	132.861
Jak1	134.674			Fxyd6	135.311			Rab18	132.794
Eif3g	134.668			Tmem181b-ps	135.136			Chd4	132.779
Nucks1	134.657			Tmem50a	134.963			Fam81a	132.741
Prpf6	134.653			Cyth1	134.937			Mlc1	132.642
Pfdn2	134.539			Psma4	134.908			Ssr1	132.412
Zc3h15	134.299			Atrn	134.864			2700089E24Rik	132.383
Bri3bp	134.293			Stx18	134.818			Psmd6	132.377
Cdc123	134.247			B3gat1	134.813			Uqcc2	132.293
Rps18	134.243			Eif3m	134.702			Ube2m	132.243
Atad1	134.167			Acap2	134.634			Nme1	132.22
Smc1a	134.081			Kif3a	134.612			Ppt1	132.189
Pds5b	133.902			Disp2	134.605			Baz1b	132.175
Got2	133.811			Sra1	134.382			Tomm7	132.045
Sgip1	133.805			Tmem191c	134.362			Asna1	132.036
Gm15612	133.801			Arhgef17	134.343			Ubxn6	132.012
Dynlt3	133.718			Cipc	134.235			Usp32	131.924
Pa2g4	133.692			Myo9b	134.221			Actl6b	131.889
Usp47	133.649			Timm13	134.114			Fyn	131.863
Ttyh3	133.636			BC031181	134.097			Psmd1	131.841
Wdfy3	133.569			Zfp523	133.794			Mllt4	131.822
Cxx1c	133.568			Cntnap1	133.671			Map2k2	131.794
Hdgfrp2	133.528			Ppp2r5a	133.504			Sympk	131.692
Emc7	133.415			Arl8a	133.389			Cry2	131.677
Brinp1	133.358			Spin1	133.136			Tmem178	131.663
Gm15564	133.153			Ube2r2	133.05			Pcnx	131.517
Uqcrfs1	132.984			Sfxn5	133.041			Hcfc1r1	131.369
Klc2	132.924			Sirt2	133.022			Arglu1	131.359
Dmwd	132.888			Mib2	132.939			Ccdc124	131.355
Sod2	132.874			Fry	132.897			Trak2	131.332
Gnaq	132.871			Chmp5	132.882			Tmem9b	131.267
Cops8	132.819			Zc3h14	132.881			Hexb	131.204
Gsta4	132.782			Ssr1	132.858			Ybx1	131.18
AW551984	132.753			Ric8b	132.749			Zdhhc17	131.102
Fh1	132.752			Txndc16	132.689			Limk2	131.048
Strbp	132.663			Sgsm2	132.668			Gprasp2	131.026
Anapc2	132.588			Osbpl9	132.618			Sbf1	131.006
Epha5	132.551			Aktip	132.584			Zc3h14	130.999
Eif1ax	132.394			Golga4	132.439			Stard7	130.98
Grb2	132.344			Tub	132.418			Map3k10	130.977
Slc38a10	132.274			Dnajc8	132.374			Rap2a	130.866
Mlec	132.192			Hdgfrp3	132.363			Sepp1	130.817
Ankrd11	132.164			Slc9a6	132.348			Sf1	130.776
Ski	132.106			Rps18	132.259			Lrrfip1	130.775
Cnih3	132.059			Nipsnap1	132.241			Psme4	130.713
Atl1	131.924			Lhfpl4	132.19			Mmd2	130.684
Osbpl1a	131.89			Use1	132.186			Csnk1d	130.533
Cops4	131.885			Htatsf1	132.122			Iqsec2	130.53
BC031181	131.848			Kcnk2	132.054			Cdc42bpb	130.504
Sfi1	131.836			Nub1	132.031			Lgi1	130.483
Pgam1	131.829			Ppt1	131.996			Lasp1	130.326
Fbxo31	131.708			Sf3b3	131.891			Kif3a	130.206
Gramd1b	131.578			Fcho1	131.877			Rab10	130.144
Synpr	131.458			Camta2	131.789			Cycs	130.08
Pla2g7	131.42			Ube2m	131.691			Klf13	130.016
Ppt1	131.349			Kars	131.608			Plxna2	130.001
Nfasc	131.326			Serp2	131.517			Wnk1	129.991
Rraga	131.017			Stk11	131.454			Anapc2	129.986
Samm50	131			Ncaph2	131.433			Ganab	129.927
Ndufa8	130.996			Kpna1	131.336			4833439L19Rik	129.855
Samd14	130.928			Abhd17a	131.295			Fubp1	129.832
Wasl	130.836			Fam178a	131.242			Eprs	129.735
Arhgap6	130.755			Mia3	131.163			Gpd1l	129.675
Fbxo9	130.656			Arhgef12	131.151			Asph	129.647
Slc24a3	130.638			Gpr6	131.128			Neo1	129.57
Alg2	130.485			Efnb2	130.982			Taok2	129.48
Ubxn6	130.459			Smc1a	130.958			Oaz2	129.473
Usp19	130.449			Tmem259	130.954			Cisd1	129.47
Rhoa	130.245			Nus1	130.932			Exd2	129.446
Impad1	130.241			Scn1b	130.893			Tango2	129.381
Gsk3b	130.227			Trio	130.876			Ctsl	129.3
Kars	130.111			Mapk1ip1	130.873			Gak	129.195
Ube2l3	129.961			Coro7	130.869			Stxbp5	128.895
Smdt1	129.922			Pcmtd2	130.86			Prrt1	128.852
Cyb5b	129.884			Ccnh	130.768			Gria4	128.746
Dtx3	129.832			Atxn2l	130.672			Rhoa	128.599
4833439L19Rik	129.792			Cwc15	130.672			Dvl1	128.572
Tsc2	129.776			Stmn2	130.636			Slc38a1	128.557
Abcf3	129.698			Srebf2	130.56			Serpine2	128.493
Smarcd3	129.693			Cacybp	130.524			Drap1	128.464
Crk	129.685			Isyna1	130.494			Fh1	128.34
Ergic1	129.677			Gphn	130.492			Dcaf6	128.327
Rere	129.673			Smim13	130.471			Sirt2	128.239
Arpc5	129.647			Frrs1l	130.362			Dmwd	128.121
Golgb1	129.643			Sms	130.336			Epn2	128.114
B3gat1	129.64			Ak1	130.202			Ftl1	127.81
Actr3b	129.619			Dmwd	130.186			Pdxk	127.801
Stt3b	129.537			Ipo5	130.176			Hook1	127.761
Gabarapl2	129.515			Mppe1	130.137			Lmtk3	127.715
Gpbp1	129.46			Ndufa7	130.087			Sin3b	127.613
2900052N01Rik	129.419			Os9	130.082			Aip	127.608
Ikbkap	129.314			Suds3	130.081			Arl2bp	127.596
Csf1r	129.205			Ppa1	130.052			Crk	127.519
Eif4e	129.189			Usp24	130.032			Ints1	127.432
Srp72	129.127			Impad1	129.993			Stt3b	127.385
Eps15	128.988			Baiap3	129.985			Uba2	127.315
Ppib	128.742			Pcnx	129.788			Etl4	127.311
Dusp8	128.73			6030419C18Rik	129.712			Zfml	127.291
Dtna	128.54			6330403A02Rik	129.69			Lzts1	127.29
Ak1	128.489			Ndufc1	129.673			Rpl12	127.247
Map1lc3b	128.458			Vps4a	129.648			P4htm	127.223
Ndufs6	128.411			Ddx50	129.617			Atl1	127.196
2700089E24Rik	128.272			Rrp7a	129.429			Pmpca	127.179
Sltm	128.045			Slc25a22	129.303			Raly	126.873
Ilf2	128.037			Ube2o	129.252			Slc6a7	126.859
Chid1	128.028			Adrbk1	129.223			Dazap2	126.784
Chl1	127.984			Syndig1	129.161			Smpd4	126.675
Cdo1	127.978			Nsfl1c	129.158			Sec23a	126.658
Golga4	127.905			Grb2	129.057			Trim35	126.626
Psmd13	127.885			Tle4	129.035			Gm12999	126.607
Uqcr10	127.769			Lrrc49	128.961			Anxa6	126.581
Nme1	127.741			Cfdp1	128.889			Myef2	126.563
Nceh1	127.662			Hnrnph3	128.811			Slc35f1	126.55
Pdxdc1	127.576			Cct6a	128.758			Cds1	126.512
Tpm3	127.567			Ppp1r37	128.73			Dnajc8	126.415
Csnk2b	127.564			Fam65a	128.692			Gatsl2	126.411
Taldo1	127.494			Dlst	128.585			Cnot7	126.328
Tollip	127.448			Ei24	128.528			Papola	126.175
Rbbp6	127.362			Tceal6	128.494			Gba2	125.868
Ldb1	127.295			Atp11a	128.478			Kcnj4	125.815
Ist1	127.237			Trim46	128.39			Zswim8	125.624
Chn1os3	127.066			Susd4	128.35			Strn3	125.584
Cadm2	127.043			Trappc11	128.284			Pip4k2b	125.441
Oxr1	127.03			Jund	128.2			Sec61a2	125.433
Dbnl	127.02			Ltn1	128.174			Adcyap1r1	125.408
Txnl1	126.996			Hrh3	128.085			Golgb1	125.254
Tmem158	126.954			Chn2	128.043			Tmeff1	125.245
Ngb	126.797			Sel1l	128.013			Tmem106b	125.231
Cnot1	126.74			Rnf44	127.99			Fam73a	125.159
Ube2m	126.689			4833439L19Rik	127.929			Sgsm2	125.062
Tmem47	126.649			Cacna2d1	127.882			Dbi	125.057
Arl2bp	126.608			Rcn2	127.839			Gdap1	125.009
1700020I14Rik	126.573			Ntm	127.815			Tceal3	124.945
Cpne5	126.473			Eif1ax	127.811			Ndufs6	124.85
Sel1l	126.426			Hars	127.793			Rpl35a	124.819
Htt	126.387			Apc2	127.754			Tmx2	124.769
Sec23a	126.312			Akap6	127.746			Flywch1	124.707
Ddah1	126.282			Pgbd5	127.738			Pygb	124.699
Tsr2	126.219			Mib1	127.65			Pdp1	124.687
Srcin1	126.168			Ndufb7	127.419			Celf3	124.672
Akap6	125.96			Mdn1	127.405			Ubl3	124.606
Dhx15	125.875			Camkk2	127.261			Kcnq3	124.588
Gm26592	125.828			Cntnap2	127.246			Strip1	124.557
Spcs1	125.817			Ccar1	127.195			Srsf2	124.501
Rpl13	125.632			Kctd13	127.184			Gpbp1	124.387
Srrm1	125.589			Asic4	127.126			Rusc2	124.286
Gucy1b3	125.586			Smpd4	126.961			Gm26582	124.238
R3hdm2	125.543			Fam216a	126.897			Dlst	124.186
Fbxl5	125.441			Pnn	126.823			Tial1	124.153
Rnf44	125.44			Htt	126.793			Abi1	124.098
Snw1	125.408			Mrpl3	126.773			Sltm	124.084
Sympk	125.338			Top1	126.733			Paxbp1	123.99
Asna1	125.291			Top2b	126.663			Luc7l	123.967
Sptbn4	125.277			Rab5c	126.65			Ogdhl	123.942
Prpf4b	125.274			Raly	126.644			Map4k3	123.93
Sprn	125.225			Cisd1	126.604			Cdc123	123.861
Coro1a	125.214			Metap2	126.597			Psmd13	123.816
Ncan	125.153			Psmc6	126.595			Ranbp2	123.797
Ank	125.152			Usp4	126.587			Emc2	123.726
Tra2a	125.088			Dhx15	126.538			Slc23a2	123.619
Dbpht2	124.777			Rasal1	126.463			Nefm	123.467
Ddx50	124.773			Ogdhl	126.407			Fam212b	123.457
Gabbr2	124.753			Cdk4	126.281			Ptpn11	123.436
Dhx36	124.705			Atp6v1f	126.243			Brinp2	123.431
Fyttd1	124.69			Anapc4	126.227			Hnrnpa0	123.397
Suds3	124.683			Actg1	126.219			Ppp1r7	123.374
Exoc3	124.596			Celsr3	126.218			Arl1	123.348
Sema6b	124.541			Spcs1	126.16			Fbxo31	123.242
Ccni	124.469			Ip6k2	126.077			Trp53inp2	123.207
Ubxn1	124.439			Ski	126.061			Phf20l1	123.128
Map9	124.378			Camsap2	125.992			Cops2	123.071
Chchd6	124.322			Plekha6	125.944			Kcnip2	123.067
Chp1	124.264			Me3	125.934			Vamp4	122.875
Fam213a	124.173			Fh1	125.871			Pde4dip	122.812
Ccndbp1	124.106			Copb1	125.803			Cabp1	122.593
Paxbp1	124.036			Csnk2b	125.734			Adcy5	122.564
Afg3l2	124			Neto2	125.696			Camk2d	122.51
Gm12999	123.966			Vapb	125.69			Higd1a	122.489
Farsb	123.7			Cops8	125.589			Ilf2	122.479
Grid1	123.691			Ythdf3	125.535			Speg	122.473
Txn2	123.691			Marf1	125.361			Itsn1	122.473
Scaf1	123.654			Plcg1	125.299			Ipo13	122.451
S100b	123.651			Cttn	125.284			Ryr3	122.448
Fam19a5	123.634			9330159F19Rik	125.281			Ptp4a2	122.434
Elp3	123.521			Atp1b3	125.271			Ndel1	122.419
Ralgapb	123.296			Gsk3b	125.262			Ssu72	122.343
Trap1	123.261			Tmem63b	125.198			Rraga	122.315
Rsrc2	123.125			Ckap5	125.183			Pik3r1	122.272
Slc5a3	123.108			Spock1	125.151			Cacna1a	122.208
Agpat6	123.062			Lonp1	125.13			Man2a2	122.124
Tmcc2	123.04			Grin2b	125.118			Tmem147	122.079
Gltscr2	123.007			Ypel5	125.095			Alg2	121.965
Stau2	122.992			Wbp5	125.012			Tra2a	121.961
Car2	122.927			Vamp4	125.001			Enah	121.937
Scn8a	122.908			Lgi1	124.829			Dnm3	121.884
Spire1	122.888			Mmp17	124.637			Gltscr2	121.825
Abcf2	122.702			Ilf2	124.606			Chchd6	121.774
1110004F10Rik	122.698			Rad23b	124.586			D7Ertd715e	121.735
Maea	122.568			Mdm4	124.485			Anxa7	121.723
B3gat3	122.532			Gps1	124.431			Tmem50b	121.708
Tmem65	122.505			Fbxo18	124.347			Ergic1	121.63
Reps2	122.497			Cpsf6	124.327			Ppp2r5a	121.526
Dpy19l1	122.427			Slirp	124.289			Prps1	121.501
Copb1	122.378			Epha4	124.286			Gorasp2	121.457
Fscn1	122.34			Senp2	124.179			Wnk2	121.446
Pcsk2	122.32			Galnt16	124.155			Arl3	121.406
Btrc	122.233			Snx32	124.123			Ipo4	121.393
Tmem147	122.2			Samm50	124.119			Gprin1	121.226
D5Ertd579e	122.187			Nin	124.028			Jund	121.136
Phactr3	122.166			Ssbp3	123.983			Elavl4	121.122
Cyfip1	122.131			Gsg1l	123.944			Sun1	121.027
Abce1	122.106			Emc4	123.878			Syt16	121.003
Gorasp2	122.08			Rit2	123.841			Hnrnpd	120.924
Pitpnm2	122.07			Asphd2	123.669			Appl1	120.889
Paics	121.962			Tmem147	123.649			Fam107a	120.86
Chmp3	121.95			Plxna2	123.584			Ubxn1	120.841
Ssu72	121.914			Cdk11b	123.506			Trak1	120.819
Fam219a	121.867			Hlf	123.491			Cdh13	120.766
Rabgap1l	121.857			4930402H24Rik	123.478			Cnrip1	120.728
Marf1	121.792			Pak3	123.464			Ranbp9	120.589
Slc2a13	121.772			Pogz	123.446			Psmd12	120.507
Rab24	121.721			A830012C17Rik	123.426			Erc2	120.45
Bace1	121.67			Aatk	123.352			Glrx3	120.354
Usp4	121.601			Bmpr2	123.206			Ptprk	120.344
Emc4	121.408			Xrn2	123.165			Eif3d	120.282
Gabra2	121.39			Ap3m2	123.076			Ube2q1	120.199
Uso1	121.265			Ola1	123.048			Atn1	120.176
Rmnd5a	121.209			Sdccag3	123.007			Ddx26b	120.168
Kazn	121.164			Eif3d	122.789			Igsf21	120.148
Pdap1	121.137			Ppp2r2b	122.783			Samm50	120.108
Reep2	121.124			Rab10	122.758			Abcf2	119.912
Arpc5l	120.989			Wdr7	122.74			Smpd1	119.891
Ssbp3	120.9			Ptma	122.736			Wwc1	119.857
Slirp	120.881			Srcap	122.729			Txn2	119.794
Ago2	120.845			Pcdh1	122.727			Cobl	119.758
Ufd1l	120.742			Csnk1d	122.696			Stk11	119.742
Psmd12	120.736			Arpc5l	122.662			Cops8	119.687
Cttnbp2	120.729			Rab3gap1	122.649			Gna11	119.675
Btbd1	120.726			Pla2g7	122.612			Taf10	119.625
Creld1	120.68			Srxn1	122.471			Nsd1	119.613
Ube2k	120.568			Anapc2	122.453			Scap	119.563
Nsd1	120.491			Rnf157	122.397			Taldo1	119.474
Wdr26	120.47			Scyl1	122.314			Galnt16	119.345
Prex1	120.455			Meaf6	122.312			Dpy19l1	119.292
Hspbp1	120.444			Psmd13	122.31			Mast2	119.286
Dync1li1	120.426			Stx16	122.299			Pde4a	119.263
Dnajc27	120.384			2410089E03Rik	122.267			Sf3b3	119.254
Nipal3	120.374			Cpsf7	122.248			6030419C18Rik	119.212
C78339	120.344			Ndufb3	122.196			P4hb	119.208
[truncated: 40,282 more rows]

## Sheet: Table 2-Modules - Regions
Supplemental Table 2
CeA	Symbol	Module		Module	Neurons	Astros	Oligos	Size (N)		SH	Symbol	Module		Module	Neurons	Astros	Oligos	Size (N)		PL	Symbol	Module		Module	Neurons	Astros	Oligos	Size (N)
	Osbpl8	black		black	0.000*	0.0275	0.9088	329			Lonp1	black		black	0.6557	0.9926	0.5092	333			Sep6	black		black	0	0.655	0.8559	494
	Mapk1	black		blue	0.8858	0.8464	0.9983	773			Psmd3	black		blue	0.0127	0	0.0026	754			0610010K14Rik	black		blue	0	0.0381	0.0082	748
	Strn	black		brown	1	1	0.9935	646			Ncln	black		brown	0.9944	0.6801	0.685	682			1700066M21Rik	black		brown	0.0056	0.2432	0.9447	593
	Slmap	black		cyan	0.0012	0.9505	0.0177	204			Rundc3a	black		cyan	0.9177	0.8314	0.99	161			2310043M15Rik	black		cyan	0.0831	0.9437	0.5891	145
	Tomm70a	black		green	1	0.0972	0.9133	449			Gga1	black		darkred	0.984	0.7063	0.9099	100			2310057M21Rik	black		green	0.0004	0.0021	0.0882	514
	Gpm6b	black		greenyellow	0	0.9934	0.9997	270			Pitpnm1	black		green	0	0.102	0.0088	368			3110035E14Rik	black		greenyellow	0.6694	0.7044	0.6895	325
	Gpr158	black		grey60	0.886	0.9994	0.7209	172			Sh2b1	black		greenyellow	0.9996	1	0.6018	217			3632451O06Rik	black		magenta	0.8114	0.2852	0.5588	404
	Erc2	black		lightcyan	0.6614	1	0.6852	201			Gpaa1	black		grey60	0.3354	0.8189	0.9364	143			3830406C13Rik	black		midnightblue	0.9947	0.9331	0.002	114
	9330132A10Rik	black		lightgreen	0.0328	0.1015	0.2183	158			Map2k4	black		lightcyan	0.9931	0.2875	0.5752	151			Abcf2	black		pink	0.0139	0.8546	0.3499	408
	Kcnab1	black		lightyellow	0.3182	0.6538	0.9243	149			Tmem63b	black		lightgreen	0.2416	0.0124	0.2756	142			Acot9	black		purple	0.9086	0.0195	0.1096	396
	Tmsb10	black		magenta	1	0.9977	0.7006	308			Agap3	black		lightyellow	0.3547	0.1462	0.99	130			Actr1a	black		red	0.9999	0.9935	0.9925	496
	Itgav	black		midnightblue	0	0.5771	0.9817	201			Katnb1	black		magenta	0.0112	0.7503	0.5829	231			Actr3b	black		salmon	0.0096	0.0111	0.0057	166
	Kcnd2	black		pink	0.9999	0.1244	0.1729	319			Ppp1r16a	black		midnightblue	0.192	0.3727	0.8886	151			Akirin1	black		tan	0.9018	0.6955	0.0181	186
	Nt5c	black		purple	0.4235	0.7429	0.9153	288			Ehmt2	black		pink	0.8671	0.742	0.9968	277			Alpk3	black		turquoise	1	0.3406	0.9797	886
	Atp2b1	black		red	0.0025	0.6736	0.6977	372			Mib2	black		purple	0.9337	0.4771	0.7579	226			Amph	black		yellow	1	1	0.9976	565
	Prkar2b	black		royalblue	0.7213	0.8283	0.1315	113			Wnk2	black		red	0.1604	0.9818	0.7705	351			Amz2	black
	B3galt1	black		salmon	0.6442	0.7079	0.1961	206			Sympk	black		royalblue	0.0272	0.6603	0.0915	128			Anapc2	black					Total	6440
	Ppp1r9a	black		tan	0.9108	0.0058	0.0096	268			Prkcsh	black		salmon	1	1	0.9748	177			Ankra2	black
	Cdk17	black		turquoise	0.5329	0	0.0051	852			Tbc1d17	black		tan	0.9936	0.9949	0.7351	182			Ankrd46	black
	Adgrl3	black		yellow	0.7461	0.004	0	473			Tsc2	black		turquoise	0.0174	0.0029	0.0131	1038			Ankrd49	black
	Plcb1	black									Cc2d1a	black		yellow	1	0.9352	0.8415	430			Ap2a2	black
	Cnksr2	black		* < 10-4			Total	6751			Apc2	black									Ap3m2	black
	Gabra4	black									Crtc1	black					Total	6372			Apbb1	black
	Lrrc4c	black									Grik5	black									Api5	black
	Sin3b	black									Pcnx3	black									Arap1	black
	Myh10	black									Smarca4	black									Arf1	black
	Shroom2	black									Apba3	black									Arf2	black
	Magi2	black									Nlgn2	black									Arf3	black
	Ppp3r1	black									Tnk2	black									Arl1	black
	Neto1	black									Fxr2	black									Arl4a	black
	Lrp12	black									Dlgap4	black									Arl8b	black
	Uchl1	black									Med25	black									Armc1	black
	Rtn4	black									Plppr2	black									Armcx1	black
	8030462N17Rik	black									Zfp865	black									Arpc2	black
	Rgs7bp	black									Adgrb2	black									Asb8	black
	Slc35f1	black									Megf8	black									Asf1a	black
	Myt1l	black									Mapk8ip3	black									Asns	black
	Diaph2	black									Numbl	black									Atad1	black
	Robo2	black									Scaf1	black									Atg12	black
	Gucy1b3	black									Ppfia3	black									Atg5	black
	Mctp1	black									Atp13a2	black									Atl1	black
	Cadm2	black									Bag6	black									Atp6ap1	black
	Gpr63	black									Vps51	black									Atp6v1b2	black
	Alcam	black									Pias4	black									Atp6v1c1	black
	Btbd3	black									Cyp46a1	black									Atxn7	black
	Abcd2	black									Prrc2a	black									AW209491	black
	Ano3	black									Phf1	black									B3galnt1	black
	Ahcyl1	black									Ppp2r3d	black									Bbs9	black
	Pde4b	black									Nr1h2	black									BC004004	black
	Kcns2	black									Ccar2	black									BC030499	black
	Itgb8	black									Cul9	black									Bcap29	black
	Fbf1	black									Neurl4	black									Bcat1	black
	Rnf150	black									Plekhm2	black									Bcl2	black
	Foxp1	black									Abhd16a	black									Becn1	black
	Nprl2	black									Coro1b	black									Bet1	black
	Rasgrp1	black									Cherp	black									Bivm	black
	Sort1	black									Zdhhc18	black									Btbd6	black
	Arpp19	black									Tbc1d10a	black									Bzw1	black
	Jcad	black									Rrp9	black									Bzw2	black
	Rbfox1	black									Pik3r2	black									C87436	black
	Arhgap32	black									Atp6v0a1	black									Cables2	black
	Gucy1a3	black									Wiz	black									Calm3	black
	Galnt13	black									Wdr81	black									Calu	black
	Cdk19	black									Ddx54	black									Cbx1	black
	Aprt	black									Syvn1	black									Ccdc32	black
	Itpr1	black									Sh3gl1	black									Ccdc91	black
	Atxn1	black									Plbd2	black									Cd83	black
	Rragd	black									Sbf1	black									Cd99l2	black
	Id4	black									Nckipsd	black									Cdc40	black
	Arhgap20	black									Ipo4	black									Cdc5l	black
	Rarb	black									Ncor2	black									Cdh13	black
	Ppp3ca	black									Zfp385a	black									Cdk17	black
	Pde10a	black									Rexo1	black									Clns1a	black
	Man1a	black									Unc5a	black									Cnrip1	black
	AI593442	black									Map3k11	black									Coa7	black
	Epha6	black									Sphk2	black									Cog7	black
	Gprin3	black									Nacad	black									Col24a1	black
	Ankrd33b	black									Gpr162	black									Copb2	black
	Hecw2	black									Map4k3	black									Cops3	black
	Prr13	black									Ano8	black									Cops7a	black
	Gpr88	black									Tbc1d10b	black									Cops8	black
	Nedd4l	black									Pex6	black									Coq5	black
	Adra2c	black									Cic	black									Cs	black
	Nptn	black									1600012H06Rik	black									Ctnna2	black
	Elmod1	black									Kifc3	black									Ctps	black
	Bnip3l	black									Mcmbp	black									Ctsb	black
	Ankrd34b	black									Car11	black									Cul1	black
	Fat3	black									Kdm4b	black									Cul2	black
	Htr1b	black									Rabl6	black									Cxxc4	black
	Pde1b	black									Slc39a3	black									Cyb561	black
	Il1rapl1	black									Ppp6r1	black									Cyb5r4	black
	Phactr1	black									Cactin	black									D1Ertd622e	black
	Cltb	black									Lpcat4	black									D6Wsu163e	black
	Rgs8	black									Kcnh3	black									Dars	black
	Slc8a2	black									Syt3	black									Dcp1b	black
	Drd2	black									Lrp1	black									Ddost	black
	Prkcb	black									Mark2	black									Ddrgk1	black
	Ccng2	black									Rnf40	black									Ddx11	black
	Dach1	black									Fbxw5	black									Ddx24	black
	Diras2	black									Gtf3c1	black									Degs2	black
	1110051M20Rik	black									Camta2	black									Derl1	black
	Dusp26	black									E130309D02Rik	black									Dhrs11	black
	Scn4b	black									Dpp9	black									Diras2	black
	Inf2	black									Cacnb1	black									Dirc2	black
	Camkk2	black									Ap1m1	black									Dis3l2	black
	Erbb4	black									Glmp	black									Dld	black
	Pdp1	black									Ap3d1	black									Dlg3	black
	Scn8a	black									Atg4d	black									Dnajc18	black
	Pmepa1	black									Msto1	black									Dnm1l	black
	Mtfp1	black									Rusc1	black									Dpp10	black
	Rasd2	black									Abcf1	black									Dpysl3	black
	Hlf	black									Rap1gap	black									Drg1	black
	Arpp21	black									Zfp574	black									Dstn	black
	Gria3	black									Abcb8	black									Dym	black
	Gpc6	black									Gas2l1	black									Dync1i1	black
	Adora2a	black									Zdhhc8	black									Dynlt3	black
	Foxg1	black									Zmiz2	black									Eif3c	black
	Ido1	black									B4galnt1	black									Eif4a2	black
	Pcdh9	black									Sssca1	black									Elovl4	black
	Dnajb2	black									Inppl1	black									Elp3	black
	Yaf2	black									Tmem151a	black									Elp4	black
	2010300C02Rik	black									Bcan	black									Emc7	black
	Sh3rf2	black									Cbarp	black									Eng	black
	Csgalnact1	black									Grk6	black									Eno2	black
	Grasp	black									Armc5	black									Enpp5	black
	Spcs3	black									Rai1	black									Epdr1	black
	Kcna4	black									Kctd17	black									Eri1	black
	Ctnnd2	black									Napa	black									Esyt1	black
	Lpl	black									Ddx23	black									Etfdh	black
	Gpr6	black									Camkv	black									Exoc3	black
	Nexn	black									Rnpep	black									Fam110b	black
	Doc2b	black									Sgsm2	black									Fam217b	black
	Mme	black									Ache	black									Fam234a	black
	Pitpnc1	black									Mgat5b	black									Fam49b	black
	Drd1	black									Ptprn	black									Fam8a1	black
	Stim2	black									Impdh1	black									Fam98b	black
	Pxk	black									Shank3	black									Farsb	black
	Podxl2	black									Grm4	black									Fbxo25	black
	Znrf3	black									Tada3	black									Fech	black
	Foxp2	black									Strn4	black									Fig4	black
	Rasgrf2	black									Slc9a1	black									Flnb	black
	Slc39a12	black									4930533O14Rik	black									Fpgt	black
	Lrrc10b	black									Ttyh3	black									Fundc2	black
	Tshz1	black									Agap2	black									Fxyd6	black
	Zswim5	black									Mgat4b	black									Gabarapl1	black
	Rnf144b	black									Actn4	black									Gabbr1	black
	Kcnj4	black									Ccdc97	black									Gabra3	black
	Ptprv	black									Pcif1	black									Gabrg2	black
	Ankrd45	black									Pofut2	black									Gars	black
	Plxnd1	black									Zfp449	black									Gdap2	black
	Ppp1r1b	black									Cad	black									Gdpd1	black
	Lingo3	black									Axin1	black									Gfm1	black
	Cbln4	black									Inpp5j	black									Ghitm	black
	Plppr1	black									Fam160b2	black									Gid8	black
	Blcap	black									Gas2	black									Gm14326	black
	Gli3	black									Sptbn2	black									Gm14827	black
	Gpr149	black									Flad1	black									Gm15328	black
	Hpca	black									Slc4a2	black									Gm15751	black
	Nsun7	black									Upf1	black									Gm16279	black
	Cnst	black									Esrra	black									Gm26642	black
	Sorcs1	black									E130114P18Rik	black									Gm37309	black
	Lrrc4	black									Nsmf	black									Gm37345	black
	Grm3	black									Atf6b	black									Gm37422	black
	Ppp2r2a	black									Iqsec2	black									Gnal	black
	Htr4	black									Cpne5	black									Gng2	black
	Epyc	black									Slc25a29	black									Golph3l	black
	Tmtc1	black									Ppard	black									Got1	black
	Smarcd1	black									Raver1	black									Gpat4	black
	Pja1	black									Foxp2	black									Gpbp1	black
	Zcchc12	black									Scap	black									Gphn	black
	Gm15612	black									2610001J05Rik	black									Gpr22	black
	Tspan9	black									Pomgnt1	black									Gskip	black
	Gm37212	black									Ngef	black									Gtpbp4	black
	Kremen1	black									Sez6	black									H3f3a	black
	Ngef	black									Panx2	black									Hacd3	black
	Nos1	black									Pfkl	black									Hars	black
	Syndig1	black									Tmem104	black									Hccs	black
	Rasgrp2	black									Mast3	black									Hnmt	black
	Tmem130	black									Gpsm1	black									Hnrnph2	black
	Zcchc18	black									Smarcd3	black									Hpcal4	black
	Tkt	black									3110043O21Rik	black									Hsp90aa1	black
	Mrap2	black									Nagpa	black									Hspa9	black
	Snn	black									Cacnb3	black									Hspd1	black
	Celf6	black									Cnot3	black									Iars2	black
	Kank3	black									Arap1	black									Idh3a	black
	Tmem251	black									Arvcf	black									Ilf2	black
	Ctu2	black									Afg3l1	black									Immt	black
	Mgat5b	black									Usp20	black									Impa1	black
	Sbk1	black									Ddx49	black									Inip	black
	Cpne5	black									Tut1	black									Insig2	black
	Mat2b	black									Smg5	black									Ints14	black
	Auts2	black									Senp6	black									Ints4	black
	Bri3bp	black									Ppil2	black									Ippk	black
	Mapk4	black									Asic1	black									Iqgap1	black
	Chst15	black									Mknk2	black									Itm2c	black
	Arhgef2	black									Ddr1	black									Jak1	black
	Fndc3b	black									Spata2l	black									Josd1	black
	Rgs7	black									Pitpnm2	black									Kars	black
	Mpp6	black									Nfxl1	black									Kat7	black
	Dok7	black									B630019K06Rik	black									Kcna6	black
	Tspyl3	black									Gys1	black									Kcnk1	black
	Slc5a7	black									Grin2c	black									Kcp	black
	Fam163b	black									Tpcn1	black									Kif1bp	black
	Zfp804a	black									Cntln	black									Kifap3	black
	Tbc1d8	black									Abcb9	black									Klhdc2	black
	Lgi1	black									Tesc	black									Klhl22	black
	Chst1	black									Cep83	black									Klhl8	black
	Smpdl3a	black									Mitd1	black									Kpna2	black
	Ppp1r3d	black									Tmem169	black									Lamb2	black
	Rab15	black									Atrip	black									Lamp1	black
	Plpp6	black									Fbxl18	black									Ldah	black
	Kcnk2	black									Gdpd5	black									Leprotl1	black
	Derl1	black									Sirt2	black									Lin7a	black
	H13	black									Inf2	black									Lipe	black
	Chn1	black									Terf1	black									Lonp2	black
	Trpc4	black									Psmd10	black									Lrpap1	black
	Macrod1	black									Golga1	black									Lrrc28	black
	Tfdp2	black									Bicra	black									Lrrtm3	black
	Igsf11	black									Grpel2	black									Lyl1	black
	Ate1	black									Mif4gd	black									Lzts1	black
	Sema5b	black									Sox11	black									M6pr	black
	Rit2	black									Ncstn	black									Mad1l1	black
	Trp53bp1	black									Slc9a3r2	black									Magee1	black
	Pld5	black									Dtnb	black									Mak16	black
	Vat1	black									Caskin2	black									Map2k1	black
	Resp18	black									Zfp275	black									Map2k4	black
	Tspyl2	black									Bcr	black									Mapk10	black
	Cdh9	black									Zfp64	black									Mb21d2	black
	Cyb561	black									Kcnip2	black									Mdn1	black
	Pde1c	black									Mcoln1	black									Mesd	black
	Meis1	black									Capn1	black									Mettl15	black
	A730017C20Rik	black									Snx17	black									Mff	black
	Usp2	black									Fam96a	black									Mgat2	black
	Mmd	black									Ptpn5	black									Mgea5	black
	Grb14	black									Sema4c	black									Micall2	black
	Kctd8	black									Wdr33	black									Mipep	black
	Mgat4b	black									Pla2g6	black									Mir9-3hg	black
	Wnt2	black									Kansl1l	black									Mpp1	black
	Synpr	black									Grasp	black									Mpped2	black
	Cttnbp2	black									Tubg2	black									Mrpl10	black
	Nt5e	black									Srebf1	black									Mrpl19	black
	Ankk1	black									Fbxo38	black									Msl3	black
	Hs3st4	black									Txndc17	black									Mum1	black
	Slc1a1	black									Naglu	black									Myadm	black
	Spry2	black									Pdgfb	black									Nap1l2	black
	Trank1	black									Vps37c	black									Nap1l3	black
	Magt1	black									Chst1	black									Nap1l4	black
	Rbfox3	black									Dnajc15	black									Napg	black
	Neu2	black									Vgf	black									Nars	black
	Acy1	black									2900079G21Rik	black									Ncald	black
	Ctxn3	black									Gaa	black									Ncbp2	black
	Slc10a4	black									Commd2	black									Nck1	black
	43170	black									Zyx	black									Ndel1	black
	Fam135b	black									Emc1	black									Ndfip2	black
	Lrrk2	black									Slc25a1	black									Ndufa10	black
	Sars	black									Bap1	black									Ndufs1	black
	Htr2c	black									Xrcc3	black									Neat1	black
	Mrps5	black									Ctc1	black									Necap1	black
	Gbe1	black									2010300C02Rik	black									Nelfb	black
	Chn2	black									Gpr4	black									Nfatc2	black
	Lsm14b	black									Bak1	black									Nif3l1	black
	Mgll	black									L3mbtl2	black									Ninl	black
	Gabrd	black									Ube3b	black									Nipa2	black
	Fgf3	black									Rcor2	black									Nme7	black
	Chat	black									Zdbf2	black									Nsg2	black
	Cd4	black									Gas6	black									Nudcd3	black
	Gar1	black									Chst12	black									Oat	black
	Ntrk1	black									Rif1	black									Ociad1	black
	Vwa3a	black									Usp30	black									Oprl1	black
	Htr6	black									Mical1	black									Orc5	black
	Togaram2	black									Wbp1l	black									Ormdl1	black
	Rhob	black									Ercc4	black									Oscp1	black
	Them6	black									Ptprd	black									Oxct1	black
	Ddc	black									Tomm40l	black									Pa2g4	black
	Npy	black									Bop1	black									Paics	black
	Ptpn7	black									Iglon5	black									Pcca	black
	Slc18a3	black									Dock7	black									Pcdhb22	black
	Baiap3	black									Pgs1	black									Pcmt1	black
	Mboat2	black									Pelp1	black									Pdcd7	black
	Araf	black									Rps6ka4	black									Pdhx	black
	Mchr1	black									Ppp2r5b	black									Pea15a	black
	Crtac1	black									Uhrf2	black									Pex11b	black
	Ocrl	black									Srm	black									Pex19	black
	Cplx1	black									Zfyve16	black									Pfkm	black
	Rem2	black									Glra2	black									Pfkp	black
	Usp11	black									Slc38a10	black									Pgrmc1	black
	Hip1r	black									Wdr92	black									Pik3c3	black
	Rasl10a	black									A730017C20Rik	black									Pik3r4	black
	Asrgl1	black									Med15	black									Pip4k2a	black
	Dlk1	black									Cdh22	black									Pitpna	black
	Inip	black									Zbtb7b	black									Pja1	black
	Wnk4	black									Rbbp8	black									Pls3	black
	Lama1	black									Mkl1	black									Pno1	black
	Ikbkap	black									Rbm11	black									Ppfia1	black
	Zadh2	black									Zscan29	black									Ppp1r21	black
	Gap43	black									Tgfb1	black									Ppp2cb	black
	Penk	black									Ccdc82	black									Ppp2r2a	black
	1810043G02Rik	black									Gtpbp3	black									Ppp3cb	black
	Atp4a	black									Lingo3	black									Ppp4r1l-ps	black
	Pwwp2b	black									Cacna1i	black									Ppt1	black
	Efnb3	black									Arhgap27	black									Prdx1	black
	Rpp25	black									Wnk1	black									Preb	black
	Abcb9	black									Gprasp1	black									Prkar2b	black
	Mesd	black									Diaph3	black									Prmt5	black
	Ntn1	black									Anapc15	black									Prnp	black
	Pax6	black									Dleu7	black									Prpf19	black
	Slc32a1	black									Plcb3	black									Prpf6	black
	Slc22a3	black									Tmem184b	black									Prps1	black
	Cers5	black									Snora33	black									Prps2	black
	Iqgap2	black									Ptk2b	black									Prrg2	black
	Ache	black									Tmem243	black									Prune1	black
	Trnp1	black									Tspan6	black									Psap	black
	Abhd6	black									Pim3	black									Psmd2	black
	Tmem200b	black									Hspa12b	black									Psmd5	black
	Aldh1a1	black									Rasgrp2	black									Pspc1	black
	Btbd11	black									4732487G21Rik	black									Qpct	black
	Efs	black									Mmp15	black									Rab1b	black
	Capn1	black									Gm13577	black									Rab27b	black
	Lgi2	black									Ei24	black									Rab28	black
	Fkbp9	black									Tmem143	black									Rab3c	black
	Cdh7	black									Tiprl	black									Rab7	black
	Vezt	black									Trhr2	black									Rab8a	black
	Arl4d	black									Kiss1r	black									Rab9b	black
	Trhde	black									2610203C20Rik	black									Rabif	black
	Scn1b	black									Slc37a1	black									Rac1	black
	Stard10	black									Fam13a	black									Rala	black
	Slc6a11	black									Slc35g2	black									Rap1gds1	black
	Gpd1	black									Cep57	black									Rarg	black
	Kcnh4	black									Med30	black									Rbbp4	black
	Arhgap5	blue									Exoc3l	black									Rbbp5	black
	Ipo7	blue									Stard3nl	black									Rbbp7	black
	Dlg2	blue									Fam53b	black									Rbbp9	black
	Usp9x	blue									Them6	black									Rbm34	black
	Alg10b	blue									Taok1	blue									Rbmx2	black
	Trim44	blue									Cul3	blue									Rdh14	black
	Lmbrd2	blue									Pum2	blue									Rela	black
	Fam120c	blue									Gpbp1	blue									Rfk	black
	Gsk3b	blue									Atf2	blue									Rgs2	black
	Gnaq	blue									Gmfb	blue									Rgs7	black
	Glg1	blue									Rab14	blue									Rhot1	black
	Ppp1r12a	blue									Kpna3	blue									Rmdn3	black
	Sptbn1	blue									Phf6	blue									Rnf128	black
	Pcdhgc5	blue									Atad1	blue									Rnf14	black
	Ash1l	blue									Eif1ax	blue									Rnf181	black
	Hectd1	blue									Eif4g2	blue									Rnf34	black
	Akap6	blue									Capza2	blue									Rnf5	black
	Rprd1a	blue									Rbm27	blue									Rngtt	black
	Tnks	blue									Api5	blue									Rnmt	black
	Pptc7	blue									Avl9	blue									Rnpepl1	black
	Gatad2b	blue									Bzw1	blue									Robo4	black
	Nr2c2	blue									Gmps	blue									Rpa1	black
	Atrn	blue									Nalcn	blue									Rpn2	black
	Ncor1	blue									Clcn3	blue									Rpp14	black
	Gabrb2	blue									Pdzd8	blue									Rps6ka1	black
	Gcc2	blue									Bmpr2	blue									Rraga	black
	Mtmr9	blue									Ptpn4	blue									Rragb	black
	Dhx9	blue									Pura	blue									Rsrc1	black
	Elfn2	blue									Lgalsl	blue									Rtca	black
	Usp29	blue									Tmed7	blue									Rtf1	black
	Ndst1	blue									Serbp1	blue									Rtl1	black
	Tenm1	blue									B230219D22Rik	blue									Rtn3	black
	Nedd4	blue									Pafah1b2	blue									Rufy3	black
	Tmem178b	blue									Abcb7	blue									Ryr2	black
	Ckap5	blue									Agps	blue									Ryr3	black
	Atp2b3	blue									Fam117b	blue									Sap30bp	black
	Celf1	blue									Lsm14a	blue									Sar1a	black
	Faxc	blue									Msl2	blue									Scg2	black
	Stxbp5l	blue									Impad1	blue									Scn3b	black
	Zfp871	blue									Tug1	blue									Sdc2	black
	Dpp8	blue									Zfr	blue									Sdcbp	black
	Pcdhac2	blue									Stag2	blue									Sdhaf3	black
	Prepl	blue									Creb1	blue									Sec22b	black
	Add2	blue									Msantd4	blue									Sec23b	black
	Rapgef2	blue									Svip	blue									Sec63	black
	Syt10	blue									Rc3h1	blue									Seh1l	black
	Kpnb1	blue									Gdap1	blue									Sesn1	black
	Clvs1	blue									Tnks2	blue									Sf3b3	black
	Klhl3	blue									Wac	blue									Sfr1	black
	Stox2	blue									Rhot1	blue									Sgpl1	black
	Pnmal1	blue									Agfg1	blue									Sh3gl2	black
	Lnpep	blue									Kifap3	blue									Shisa5	black
	Arsb	blue									Gabrb3	blue									Sigirr	black
	Ctnnb1	blue									Purb	blue									Skiv2l2	black
	Cog5	blue									Map2	blue									Slc16a6	black
	Klhl34	blue									Cstf2t	blue									Slc17a5	black
	Bace1	blue									Acsl4	blue									Slc25a12	black
	Wasf3	blue									Sgpp1	blue									Slc25a16	black
	Dstyk	blue									Itfg1	blue									Slc2a4rg-ps	black
	Tanc2	blue									Ssr3	blue									Slc33a1	black
	Klhl11	blue									Rbbp7	blue									Slc41a2	black
	Wdr48	blue									Itch	blue									Slc4a1ap	black
	Ptprn2	blue									Hipk3	blue									Slu7	black
	Nbr1	blue									Rab10	blue									Smc1a	black
	Senp5	blue									Hdgfl3	blue									Snap29	black
	Plcxd3	blue									Tm9sf3	blue									Snn	black
	Ccdc85c	blue									Rad21	blue									Snx14	black
	Eif4ebp2	blue									Eif4a2	blue									Snx16	black
	Gpalpp1	blue									Nxt2	blue									Snx2	black
	Irs2	blue									Cggbp1	blue									Snx4	black
	Xpo7	blue									Tmx4	blue									Snx6	black
	Pde7b	blue									Cdc73	blue									Sox17	black
	Supt16	blue									Ccdc47	blue									Sparcl1	black
	Slc9a7	blue									Lamp2	blue									Spg21	black
	Fzd3	blue									Slc30a4	blue									Srfbp1	black
	Pias1	blue									Rnf139	blue									Ssb	black
	Psd3	blue									Gja1	blue									St3gal5	black
	Anks1b	blue									Kcnd2	blue									St7l	black
	Cdkl5	blue									Mib1	blue									Stambp	black
	Cdc42bpb	blue									Anp32e	blue									Stard9	black
	Atg9a	blue									Mmgt1	blue									Stk36	black
	Lrrc8b	blue									Atxn7l3b	blue									Stk39	black
	Dennd5a	blue									Zc3h12b	blue									Stx12	black
	Med14	blue									Crebrf	blue									Sugt1	black
	Arhgef9	blue									Tax1bp1	blue									Sumf1	black
	Scn2a	blue									Tmem106b	blue									Sumo2	black
	Dnal1	blue									Bag4	blue									Syap1	black
	Lcor	blue									Stam	blue									Syn2	black
	Fbxw11	blue									Crk	blue									Syt1	black
	Pdha1	blue									9330132A10Rik	blue									Taf4	black
	Pdpr	blue									BC030336	blue									Taf9b	black
	Smcr8	blue									Pak3	blue									Tax1bp1	black
	Gse1	blue									Fam91a1	blue									Tcp1	black
	Pcdhgc3	blue									Tmem170b	blue									Tet2	black
	Arfgef3	blue									B4galt6	blue									Tfam	black
	Xkr4	blue									Negr1	blue									Thnsl1	black
	Nol11	blue									Tmem167	blue									Thumpd1	black
	Cfp	blue									Dhx15	blue									Thy1	black
	Dnajc5	blue									Mtpn	blue									Timm23	black
	Luzp2	blue									Kpna1	blue									Tkt	black
	Cpsf2	blue									Spag9	blue									Tlcd1	black
	Map3k13	blue									Vstm2a	blue									Tm9sf2	black
	Dgkg	blue									Serp1	blue									Tmem115	black
	Palm2	blue									Hspa13	blue									Tmem117	black
	Cbl	blue									Qk	blue									Tmem177	black
	Sntg1	blue									Hnrnpk	blue									Tmem184c	black
	Tcf20	blue									Fam171b	blue									Tmem237	black
	Pde4d	blue									Cdk17	blue									Tmem246	black
	Rab5b	blue									Prkar1a	blue									Tmem33	black
	Dnajc16	blue									Ythdf1	blue									Tmem35a	black
	Pcdh17	blue									Larp4	blue									Tmem68	black
	Mef2d	blue									Braf	blue									Tmx2	black
	Alkbh8	blue									Top2b	blue									Tpp2	black
	Bod1l	blue									Ulk2	blue									Trappc12	black
	Acvr1b	blue									Golph3	blue									Trim32	black
	Sorbs1	blue									Sugt1	blue									Trmt10c	black
	Kcnma1	blue									Pgap1	blue									Tsc22d1	black
	Ankrd52	blue									Wnk3	blue									Tsr2	black
	Rgmb	blue									Epc2	blue									Ttc30b	black
	Fam13b	blue									Bmpr1a	blue									Ttll1	black
	Kif3b	blue									Uba2	blue									Tuba4a	black
	Tnpo3	blue									Abhd13	blue									Tubgcp5	black
	Crkl	blue									Eps15	blue									Tusc3	black
	Sstr4	blue									Arcn1	blue									Twsg1	black
	Unkl	blue									Csnk1g3	blue									Uba2	black
	Sik2	blue									Trove2	blue									Ube2j1	black
	Tnrc18	blue									Dcaf12l1	blue									Ube2n	black
	Setd7	blue									Zfp148	blue									Ube2q1	black
	Zc3h12c	blue									Zbtb41	blue									Ube2z	black
	Sec23a	blue									Pbrm1	blue									Ubr7	black
	C330007P06Rik	blue									Ankrd17	blue									Ubxn8	black
	Gm4202	blue									Wwp1	blue									Ufd1	black
	Camk1d	blue									Mid2	blue									Upf2	black
	Fam168a	blue									Oxr1	blue									Usp1	black
	Gpam	blue									Zxdb	blue									Usp14	black
	Naa25	blue									Ids	blue									Utp18	black
	Coa3	blue									Mfsd14a	blue									Utp4	black
	Dock3	blue									Slc4a10	blue									Vdac1	black
	Timp3	blue									Azin1	blue									Vhl	black
	Smarcal1	blue									Sgip1	blue									Vipas39	black
	Grin2b	blue									Rabgap1	blue									Vopp1	black
	Bcl9l	blue									Camta1	blue									Vps41	black
	Uprt	blue									Fgf14	blue									Vps45	black
	Ntrk2	blue									Yipf6	blue									Vps4a	black
	Adcy9	blue									Tspyl5	blue									Vps4b	black
	Soga3	blue									Stt3a	blue									Wdpcp	black
	Pip4k2b	blue									Rp2	blue									Wdr45b	black
	Atxn1l	blue									Zhx1	blue									Wdr47	black
	Kantr	blue									Spred1	blue									Xylt2	black
	Kif3c	blue									Kif5b	blue									Yars	black
	Stim1	blue									Appbp2	blue									Ykt6	black
	Eif3a	blue									Alg11	blue									Ythdf1	black
	Prkar2a	blue									Togaram1	blue									Ywhae	black
	Lrba	blue									Fut9	blue									Zbtb49	black
	Vkorc1l1	blue									Ttbk2	blue									Zc2hc1a	black
	Eloa	blue									Ranbp6	blue									Zc4h2	black
	Adgrb3	blue									Zbtb44	blue									Zfp2	black
	Dnajb14	blue									Gclm	blue									Zfp422	black
	Acp2	blue									Ccnt1	blue									Zfp65	black
	Kcnn3	blue									Wdr26	blue									Zfp729b	black
	Gpatch2l	blue									Map7d2	blue									Zfp931	black
	Cds2	blue									Marcks	blue									Zfp943	black
	Snx27	blue									Zkscan8	blue									Zkscan17	black
	Kpna6	blue									Atp13a3	blue									Zmynd19	black
	Dag1	blue									Golph3l	blue									Zwint	black
	Snf8	blue									Med13	blue									43160	blue
	Egr3	blue									Caprin1	blue									1700020I14Rik	blue
	Cdh2	blue									Cacul1	blue									2310061I04Rik	blue
	Mmaa	blue									Usp14	blue									2510009E07Rik	blue
	Hnrnpul2	blue									Mindy2	blue									2610002M06Rik	blue
	Lsamp	blue									Ssx2ip	blue									2700049A03Rik	blue
	Ptpra	blue									Rab5a	blue									4933408B17Rik	blue
	Fads2	blue									Cdkn2aip	blue									5730455P16Rik	blue
	Nos1ap	blue									Rock2	blue									6030458C11Rik	blue
	Rims2	blue									Actr2	blue									9330132A10Rik	blue
	Chtf8	blue									Uhrf1bp1l	blue									A830018L16Rik	blue
	Zfyve9	blue									Kbtbd8	blue									Aak1	blue
	Shank1	blue									Rab33b	blue									Aars	blue
	Glra3	blue									Mex3c	blue									Abca5	blue
	Tmem132d	blue									Ndfip2	blue									Abcb7	blue
	Hcn1	blue									Slc35a5	blue									Abcc1	blue
	Gfod1	blue									AI597479	blue									Abhd17a	blue
	Kat6a	blue									Triqk	blue									Abi1	blue
	Rimbp2	blue									Itgav	blue									Acbd3	blue
	Zfp507	blue									Nol8	blue									Acp2	blue
	Zc3h14	blue									Ahcyl1	blue									Acp6	blue
	Mphosph8	blue									Ankrd12	blue									Acr	blue
	Sv2c	blue									Man1a	blue									Acsl3	blue
	Prkg1	blue									Pdpk1	blue									Adam10	blue
	Nfe2l1	blue									Aebp2	blue									Adam1a	blue
	Dok6	blue									Mtmr2	blue									Adam22	blue
	Tnr	blue									D3Ertd254e	blue									Adam23	blue
	Ptpn11	blue									Megf9	blue									Adam9	blue
	Pom121	blue									Rhobtb3	blue									Add3	blue
	Dip2c	blue									Rsf1	blue									Adgrb3	blue
	Ncoa4	blue									Hspa4l	blue									Adipor1	blue
	Socs7	blue									Ppp4r2	blue									Ado	blue
	Cdk5r1	blue									Slc2a13	blue									Adora1	blue
	Paip2b	blue									Crnkl1	blue									Agap1	blue
	Rab22a	blue									Asph	blue									Agfg1	blue
	Arid5b	blue									Zik1	blue									Aggf1	blue
	Scaf11	blue									Edem3	blue									Ago4	blue
	Meis2	blue									Papolg	blue									Ahcyl1	blue
	Calm1	blue									Nap1l3	blue									Ak2	blue
	Ncam2	blue									Nadk2	blue									Akap11	blue
	Exoc6	blue									Clock	blue									Aldh3a2	blue
	Foxk1	blue									Slc35f1	blue									Alg11	blue
	Grid1	blue									Fut8	blue									Alg2	blue
	Prrc2b	blue									Ccng1	blue									Amdhd2	blue
	Nav3	blue									Zfp770	blue									Ank	blue
	Cltc	blue									Rnf168	blue									Ankrd17	blue
	Shc3	blue									Gopc	blue									Ankrd45	blue
	Trpc5	blue									Cebpg	blue									Ankrd50	blue
	Bptf	blue									Ptov1	blue									Anks3	blue
	Mrpl14	blue									Hnrnpr	blue									Anp32e	blue
	Ikbkg	blue									Bcl11b	blue									Ap1ar	blue
	D430019H16Rik	blue									Ebag9	blue									Ap5m1	blue
	Iffo1	blue									Nek7	blue									Apc	blue
	Ankfn1	blue									Pgr	blue									Appbp2	blue
	Mdga2	blue									Ctso	blue									Ar	blue
	Fam81a	blue									Fem1c	blue									Arcn1	blue
	Dnajc14	blue									Rnmt	blue									Arhgap20	blue
	Arnt2	blue									Camsap2	blue									Arhgap26	blue
	Armcx4	blue									Dnajc10	blue									Arid4a	blue
	Klhl23	blue									Col4a3bp	blue									Arl5a	blue
	Glyr1	blue									Tigd2	blue									Armc8	blue
	Cse1l	blue									N4bp2l2	blue									Ascc3	blue
	Slc8a1	blue									Fxr1	blue									Astn1	blue
	Lrrc41	blue									Otub1	blue									Astn2	blue
	Pde4dip	blue									Uba6	blue									Atf2	blue
	Ttbk1	blue									Rnf19a	blue									Atp6v1a	blue
	Pds5a	blue									Tmed10	blue									Atp8a1	blue
	Sec22c	blue									Zfp322a	blue									Atxn1	blue
	Lonrf2	blue									Rwdd4a	blue									Aup1	blue
	Mta3	blue									Cse1l	blue									Avl9	blue
	Abat	blue									Adam9	blue									Azin1	blue
	D5Ertd579e	blue									Atp8a1	blue									B230219D22Rik	blue
	Stk24	blue									Samd8	blue									B3galt1	blue
	Arfgap2	blue									Slc39a10	blue									B4galt6	blue
	Ctr9	blue									Hook3	blue									Bag4	blue
	Cdk12	blue									Gpr22	blue									Bbx	blue
	Ankrd50	blue									Smc3	blue									BC030336	blue
	Nup98	blue									Socs5	blue									BC051142	blue
	Arid1a	blue									Klhl13	blue									Bcl11b	blue
	Nipa1	blue									Mllt3	blue									Bcl2l2	blue
	Fxyd5	blue									Tgs1	blue									Bmpr1a	blue
	Psmd1	blue									Cadm2	blue									Bmpr2	blue
	Capn15	blue									Il1rapl1	blue									Bms1	blue
	1700025G04Rik	blue									Prps2	blue									Bmt2	blue
	Plxnc1	blue									Khdrbs2	blue									Bri3bp	blue
	Atp6v0a2	blue									Sec63	blue									Brox	blue
	Rbfox2	blue									Fam49a	blue									C2cd5	blue
	Garem1	blue									Cpsf2	blue									Cab39l	blue
	Zcrb1	blue									Zbtb38	blue									Cacna2d1	blue
	Fbxo21	blue									Erbb4	blue									Cacnb2	blue
	Uimc1	blue									Farsa	blue									Cacnb4	blue
	Wwc2	blue									Lmbrd1	blue									Cacul1	blue
	Hdlbp	blue									Rtn4	blue									Cadm1	blue
	Srr	blue									Tmem33	blue									Cadm2	blue
	Kcna3	blue									Srp72	blue									Cadps2	blue
	Zfp609	blue									Prpf4b	blue									Calm1	blue
	Gosr1	blue									Itgb1	blue									Camk4	blue
	Cdh18	blue									Gabra4	blue									Camsap2	blue
	Slc35e1	blue									Dlg1	blue									Camta1	blue
	Cntnap2	blue									Cask	blue									Cand1	blue
	Arhgef11	blue									Xpot	blue									Caprin1	blue
	Ghitm	blue									Fam103a1	blue									Car10	blue
	Ndufab1	blue									Fgf12	blue									Car7	blue
	Ube2i	blue									Dach1	blue									Casd1	blue
	Cul4a	blue									Gabra1	blue									Cask	blue
	Prpf8	blue									Ctdspl2	blue									Casp8ap2	blue
	Arid1b	blue									Gpc5	blue									Cbx5	blue
	Taok3	blue									Acsl3	blue									Ccdc134	blue
	Rnf24	blue									Lrrtm2	blue									Ccdc71l	blue
	Zbtb37	blue									Mpnd	blue									Ccdc84	blue
	Chrm5	blue									Nr3c2	blue									Ccng1	blue
	Prdm2	blue									Gng12	blue									Ccnt1	blue
	Dgkh	blue									Pde12	blue									Ccny	blue
	Trpm3	blue									Olfm3	blue									Ccser1	blue
	Slit3	blue									Tmem56	blue									Cct6a	blue
	Kctd10	blue									Zfp24	blue									Cd200	blue
	Zfp955b	blue									Tnik	blue									Cdadc1	blue
	Zfp551	blue									Hadhb	blue									Cdc37l1	blue
	Ndufc1	blue									Gpkow	blue									Cdh18	blue
	Nek4	blue									Rbbp9	blue									Cdk14	blue
	Rnf214	blue									Gm14326	blue									Cdkn2aip	blue
	Mmp24	blue									Slc1a3	blue									Chic1	blue
	Snw1	blue									Zfp37	blue									Chl1	blue
	Rab3gap1	blue									Fstl5	blue									Chn1os3	blue
	Ankrd11	blue									Plcb1	blue									Chn2	blue
	Cpox	blue									Hnrnph2	blue									Chrm2	blue
	Xpnpep3	blue									Nyap2	blue									Ciapin1	blue
	Chd3	blue									Gdi2	blue									Clcn4	blue
	Zdhhc22	blue									Tmem229a	blue									Clcn5	blue
	Usp12	blue									B3galnt1	blue									Clock	blue
	Igf2r	blue									Tbl1xr1	blue									Cltc	blue
	Smdt1	blue									Nras	blue									Cmpk2	blue
	Scaf8	blue									Amot	blue									Cmtr2	blue
	Cep85l	blue									Clint1	blue									Cnih3	blue
	Usp51	blue									Vezt	blue									Cnih4	blue
	Unc5d	blue									Lrrc4c	blue									Cnot11	blue
	1700008O03Rik	blue									Prkci	blue									Cnot4	blue
	Ddb1	blue									Akr7a5	blue									Cnr1	blue
	Dlgap2	blue									Ubxn7	blue									Cnst	blue
	Zc3h7b	blue									Ddx3x	blue									Cntn1	blue
	Fry	blue									Zfp748	blue									Cntn4	blue
	Supt6	blue									Zdhhc2	blue									Coa5	blue
	Tenm3	blue									Cntnap5a	blue									Col15a1	blue
	Slc25a30	blue									Trp53inp1	blue									Col4a3bp	blue
	Tecpr2	blue									Amdhd2	blue									Cpne4	blue
	Nwd1	blue									Mat2a	blue									Cpox	blue
	Igf1r	blue									Tom1l1	blue									Cpsf2	blue
	Taok2	blue									Arl2	blue									Creb1	blue
	Il12rb2	blue									Fam126b	blue									Crebl2	blue
	Vgll4	blue									Gnai3	blue									Crk	blue
	Scarb2	blue									Ccser2	blue									Csnk1g3	blue
	Pdgfra	blue									Wdr77	blue									Csrnp3	blue
	Gpkow	blue									Polr2c	blue									Ctdspl	blue
	Cmtm4	blue									Ccng2	blue									Ctnnb1	blue
	Rmnd5a	blue									Chic1	blue									Ctnnd2	blue
	Heatr5b	blue									Mgat4c	blue									Cx3cr1	blue
	Sox6	blue									Kcnab1	blue									D10Wsu102e	blue
	Lancl3	blue									Rnf141	blue									D3Ertd254e	blue
	Sesn3	blue									Nup155	blue									D5Ertd579e	blue
	Zfp142	blue									Kitl	blue									Dcaf10	blue
	Gstz1	blue									Gucy1a3	blue									Dcaf12	blue
	Agpat3	blue									Tmem117	blue									Dcaf7	blue
	Thrap3	blue									Fam45a	blue									Dclk1	blue
	L1cam	blue									Dpp10	blue									Dcp2	blue
	Trappc10	blue									Cope	blue									Dctn4	blue
	Rnf4	blue									Ogfod2	blue									Dcun1d4	blue
	Dcc	blue									Tmem68	blue									Ddx39	blue
	Tpr	blue									Zfp719	blue									Ddx39b	blue
	Pdp2	blue									Rab8b	blue									Ddx42	blue
	Ttc9	blue									Hlf	blue									Ddx6	blue
	Chrnb2	blue									Zfp397	blue									Deaf1	blue
	Atp8a2	blue									Usp25	blue									Def8	blue
	Srsf9	blue									Nrip1	blue									Dennd5a	blue
	Ntrk3	blue									Tmed8	blue									Deptor	blue
	Kctd16	blue									Rab21	blue									Dffb	blue
	Zfp84	blue									Papd5	blue									Dgat1	blue
	Agap1	blue									Atg12	blue									Dhdh	blue
	Dclk1	blue									Fam155a	blue									Dip2c	blue
	Usp15	blue									Rce1	blue									Dlat	blue
	Cdk7	blue									Mpped2	blue									Dmxl2	blue
	Dvl3	blue									Ankrd34b	blue									Dnajb14	blue
	Chrna7	blue									Spty2d1	blue									Dnajc10	blue
	Aff2	blue									Ate1	blue									Dnajc13	blue
	Dusp8	blue									Ptms	blue									Dnajc3	blue
	Eif4g1	blue									Ankrd54	blue									Dner	blue
	Nmt1	blue									Pign	blue									Dnm3	blue
	Gpd1l	blue									Xk	blue									Dus1l	blue
	Snx9	blue									Bax	blue									Dusp11	blue
	Slc25a44	blue									Wbp1	blue									Dusp19	blue
	Lrrc47	blue									Lin7b	blue									Dxo	blue
	Slc35f3	blue									Secisbp2l	blue									Dync1li2	blue
	Camsap1	blue									S1pr1	blue									Dzank1	blue
	Cox4i1	blue									Ednrb	blue									Edil3	blue
	Ptpn9	blue									Zfp428	blue									Efemp2	blue
	Synrg	blue									Asphd1	blue									Ehbp1	blue
	Kidins220	blue									Selenop	blue									Ehd4	blue
	Soga1	blue									Kcnj2	blue									Eif3a	blue
	Tex2	blue									Nab2	blue									Eif4e2	blue
	Zdhhc5	blue									Meis2	blue									Eif4enif1	blue
	Zfp652	blue									Adprhl2	blue									Eif4g2	blue
	Atl1	blue									Mut	blue									Eif5a2	blue
	Rnf8	blue									Wdr47	blue									Elavl2	blue
	Ipp	blue									Zfp455	blue									Enkd1	blue
	9130011E15Rik	blue									Tysnd1	blue									Eny2	blue
	Cyb5d1	blue									Gnl3l	blue									Epb41	blue
	Lman2	blue									Hrasls	blue									Epc2	blue
	Slc25a3	blue									Slc30a9	blue									Epha5	blue
	Cers1	blue									Prune2	blue									Epha7	blue
	Rbl2	blue									AI846148	blue									Epm2aip1	blue
	Xxylt1	blue									Btbd1	blue									Eps15	blue
	Sept11	blue									Yjefn3	blue									Erc2	blue
	Gtf3c4	blue									Chl1	blue									Erlin1	blue
	Pmpca	blue									Kcnd3	blue									Ermp1	blue
	Exoc4	blue									Pds5b	blue									Ero1l	blue
	Timm9	blue									Hapln1	blue									Etl4	blue
	4931406P16Rik	blue									Tab1	blue									Etv1	blue
	Psmc5	blue									Slitrk2	blue									Exd2	blue
	Ston2	blue									1190002N15Rik	blue									Exoc2	blue
	Ccdc107	blue									Lrrc73	blue									Exoc8	blue
	Setd1b	blue									Mtx3	blue									Ext1	blue
	Zdhhc9	blue									St8sia4	blue									Extl2	blue
	Memo1	blue									Trnt1	blue									Fam102a	blue
	D430042O09Rik	blue									Id4	blue									Fam109a	blue
	Dyrk2	blue									Rorb	blue									Fam117b	blue
	Cttnbp2nl	blue									Skil	blue									Fam122b	blue
	Echdc1	blue									Kcnv1	blue									Fam129c	blue
	Jmjd4	blue									Hs6st2	blue									Fam149a	blue
	Pcdhga5	blue									Shroom2	blue									Fam155a	blue
	Arhgap35	blue									Ppp1r9a	blue									Fam171a1	blue
	Tnpo2	blue									Bach1	blue									Fam171b	blue
	Kbtbd4	blue									Ero1l	blue									Fam172a	blue
	Clasp1	blue									Myo5a	blue									Fam199x	blue
	Grin2a	blue									Abcd3	blue									Fam210a	blue
	Grik3	blue									Slc39a12	blue									Fam234b	blue
	Zfp169	blue									9330182L06Rik	blue									Fam49a	blue
	Fam162a	blue									Tmem245	blue									Fam50a	blue
	Pou3f4	blue									Tmem161a	blue									Fam78b	blue
	Icmt	blue									Usp47	blue									Fam81a	blue
	Gm5124	blue									2610002M06Rik	blue									Fam91a1	blue
	D230025D16Rik	blue									Gpd2	blue									Fbxl12	blue
	Vprbp	blue									Vwa5a	blue									Fbxl14	blue
	Mtr	blue									Chml	blue									Fbxl6	blue
	Ylpm1	blue									Cfap97	blue									Fbxo28	blue
	Cacna1b	blue									Prkce	blue									Fbxo45	blue
	Zbtb4	blue									Tor2a	blue									Fbxw9	blue
	Nacc2	blue									Znrf2	blue									Fem1b	blue
	Kif1bp	blue									Ermp1	blue									Fgf12	blue
	Tnfaip8l3	blue									Dstn	blue									Fgf14	blue
	Tgoln1	blue									Fbxo45	blue									Flrt2	blue
	Fah	blue									Brf1	blue									Fmn2	blue
	Tns3	blue									Slc1a2	blue									Fndc3a	blue
	Apba1	blue									Atg4c	blue									Foxj3	blue
	Dhx8	blue									Erlin1	blue									Foxk2	blue
	Kif1a	blue									Ncoa7	blue									Foxo3	blue
	Zfp146	blue									Ascc3	blue									Frmpd4	blue
	Mtf1	blue									Cpd	blue									Frrs1l	blue
	Fem1a	blue									Cdh11	blue									Fyttd1	blue
	Kcnb1	blue									Ercc1	blue									Gabra1	blue
	Zfp398	blue									Mapk1ip1l	blue									Gabra4	blue
	Phf2	blue									Zdhhc21	blue									Gad1	blue
	Sep3	blue									Tjp1	blue									Galnt1	blue
	Gm5415	blue									Lpar4	blue									Galnt13	blue
	Jade2	blue									A830018L16Rik	blue									Gclm	blue
	Upf3b	blue									Acbd4	blue									Gda	blue
	Champ1	blue									Casp2	blue									Gdi2	blue
	Mrps15	blue									Dnajb14	blue									Gfpt1	blue
	Gna11	blue									Pcyox1	blue									Gja1	blue
	Zcchc24	blue									Necab1	blue									Glod4	blue
	Srpr	blue									Dnajc3	blue									Gm12258	blue
	Susd6	blue									Zfp758	blue									Gm14257	blue
	Acsl1	blue									Kcnb2	blue									Gm16485	blue
	Hspa12a	blue									9530082P21Rik	blue									Gm22771	blue
	Usp28	blue									Homer1	blue									Gm37499	blue
	Epb41l1	blue									Virma	blue									Gm38393	blue
	Dpp6	blue									Zfp87	blue									Gm4793	blue
	Mrs2	blue									2210016L21Rik	blue									Gm7694	blue
	Crim1	blue									Mfsd13a	blue									Gna13	blue
	Jazf1	blue									Zfp422	blue									Gnai1	blue
	Nrcam	blue									Ccser1	blue									Gnl3l	blue
	Spen	blue									Uap1	blue									Gnpda2	blue
	Usp40	blue									Elp4	blue									Golga4	blue
	Adarb1	blue									Nfkbil1	blue									Golph3	blue
	Zscan25	blue									Tmcc3	blue									Gopc	blue
	Chsy3	blue									Dnajc4	blue									Gpalpp1	blue
	Pcdhga9	blue									Tnfrsf19	blue									Gpd1l	blue
	Gigyf2	blue									Rsu1	blue									Gpd2	blue
	Phlpp1	blue									Npepl1	blue									Gpkow	blue
	Dnajc7	blue									Lrrtm3	blue									Gpm6b	blue
	Tbc1d24	blue									Appl1	blue									Gpr158	blue
	Slitrk5	blue									Aqp4	blue									Gpr85	blue
	Chst11	blue									Enpp4	blue									Grm3	blue
	Abcg1	blue									Arl5b	blue									Grm5	blue
	Als2	blue									Aak1	blue									Gucy1b3	blue
	Eif4enif1	blue									Tmem91	blue									Hadhb	blue
	Vash1	blue									Tspan12	blue									Hapln2	blue
	Nsd3	blue									Ankrd28	blue									Haus2	blue
	Xpo5	blue									Tfpt	blue									Hdac3	blue
	Med13l	blue									Gclc	blue									Hdac9	blue
	Gm6030	blue									Dcun1d3	blue									Hdhd5	blue
	D17Wsu92e	blue									Mtx1	blue									Hecw1	blue
	Jtb	blue									Klhdc8b	blue									Hipk1	blue
	Osbpl10	blue									Rragd	blue									Hnrnpa3	blue
	Zc3h4	blue									Enah	blue									Hnrnpk	blue
	Myl12b	blue									Slc31a1	blue									Hnrnpr	blue
	Slc38a10	blue									Srrd	blue									Hps5	blue
	Pcdhgb7	blue									Plekho1	blue									Hrasls	blue
	2900097C17Rik	blue									Egfl7	blue									Hs6st2	blue
	Pcdhgb5	blue									Spire1	blue									Hspa13	blue
	Pcyt1b	blue									Lin37	blue									Hspa4	blue
	Arl3	blue									Hmgcs1	blue									Hspa4l	blue
	Tnip2	blue									Ppp1r15b	blue									Ids	blue
	Gucy1a2	blue									Psmd11	blue									Ikbkg	blue
	Naa60	blue									Cops3	blue									Il12rb2	blue
	Abr	blue									Cav2	blue									Ildr2	blue
	Sin3a	blue									Shisa9	blue									Impad1	blue
	Armcx2	blue									Stau2	blue									Inafm2	blue
	Hint1	blue									Mpp1	blue									Ing3	blue
	Fgd1	blue									Eef1d	blue									Ints12	blue
	Prpf18	blue									Stxbp5	blue									Ints8	blue
	Rad54l2	blue									Slc35c2	blue									Ipo5	blue
	Pcdhga6	blue									Mapre1	blue									Ipp	blue
	Wdr35	blue									Ncoa2	blue									Itch	blue
	Vopp1	blue									Klhl23	blue									Itfg1	blue
	Mpc2	blue									Snx25	blue									Itgb1bp2	blue
	Sptb	blue									6030458C11Rik	blue									Itgb8	blue
	Med12l	blue									Synpr	blue									Jade1	blue
	Fosl1	blue									Arl1	blue									Jam3	blue
	D130043K22Rik	blue									Gad1	blue									Jcad	blue
	Tmem74	blue									Ispd	blue									Jmy	blue
	Pradc1	blue									Rapgef4	blue									Jrkl	blue
	Klhl12	blue									Dcaf10	blue									Kank3	blue
	Pcdhga8	blue									Mcl1	blue									Kbtbd7	blue
	Copg2	blue									Ak3	blue									Kbtbd8	blue
	Efnb2	blue									Mthfsd	blue									Kcna1	blue
	Mkrn2	blue									Pcdhb18	blue									Kcna4	blue
	Flrt3	blue									Pcdh9	blue									Kcnab1	blue
	4931428F04Rik	blue									Spata5	blue									Kcnb2	blue
	Robo1	blue									Pcyox1l	blue									Kcnc2	blue
	43161	blue									Erc2	blue									Kcnd2	blue
	Fth1	blue									Rmnd5a	blue									Kcnf1	blue
	Elmsan1	blue									Aldh5a1	blue									Kcnh7	blue
	Epg5	blue									Sec23ip	blue									Kcnq5	blue
	Ank2	blue									Scd1	blue									Kcnv1	blue
	Eid2b	blue									Ankrd49	blue									Kctd4	blue
	Zfp174	blue									Pcyt1a	blue									Kif1b	blue
	Gpr135	blue									Arap2	blue									Kif21a	blue
	Tmod2	blue									2310061I04Rik	blue									Kif22	blue
	Btbd7	blue									Cyth2	blue									Kif2a	blue
	Ppm1f	blue									B3galt2	blue									Kif5b	blue
	Fam84a	blue									Tmem39b	blue									Kif5c	blue
	Atp7a	blue									Necap2	blue									Kitl	blue
	Hyou1	blue									Pacsin3	blue									Klhl12	blue
	Kansl1	blue									Fam84b	blue									Klhl2	blue
	Rapgef5	blue									Grem2	blue									Klhl23	blue
	Pstk	blue									Coq6	blue									Kpna1	blue
	Rnf14	blue									Tcp11l2	blue									Kpna3	blue
	Atp6v1g1	blue									Ift81	blue									Kpna4	blue
	Crip3	blue									Prmt6	blue									Lamp2	blue
	Pcdha12	blue									Zfp595	blue									Lancl2	blue
	Bahcc1	blue									Cab39l	blue									Las1l	blue
	Gm9833	blue									Ric3	blue									Lgals4	blue
	Gm5113	blue									Ralgps2	blue									Lig4	blue
	Kmt2e	blue									Btg1	blue									Lin54	blue
	Mlec	blue									Lrrc8c	blue									Lmbrd1	blue
	Ypel4	blue									Arl15	blue									Lnpk	blue
	43167	blue									Xrcc4	blue									Lrp11	blue
	Flrt1	blue									Slc30a7	blue									Lrp1b	blue
	Lgi4	blue									Rgs7	blue									Lrp6	blue
	Pcdhgb6	blue									Extl2	blue									Lrrc4c	blue
	Gm17201	blue									Fam53a	blue									Lrrc8c	blue
	Klf3	blue									Slc24a2	blue									Lrrn1	blue
	Pcdhga7	blue									Mettl18	blue									Lrrn3	blue
	Il6ra	blue									L2hgdh	blue									Lrrtm2	blue
	Dbt	blue									Pdcd6ip	blue									Lsm14a	blue
	Gpr107	blue									Phf3	blue									Luzp1	blue
	Appl2	blue									Efcab14	blue									Lysmd3	blue
	Dpp7	blue									Edil3	blue									Macrod2	blue
	Xk	blue									Zfp709	blue									Man1a2	blue
	Cntnap5b	blue									Cntn4	blue									Map2	blue
	Hinfp	blue									3632454L22Rik	blue									Map7	blue
	Pde11a	blue									Lmna	blue									Map7d2	blue
	Taco1	blue									Uevld	blue									Mapk1	blue
	Cacna1c	blue									Snx18	blue									Mapk6	blue
	Rasa3	blue									Efemp2	blue									Mctp1	blue
	Baalc	blue									Slc16a1	blue									Mdm1	blue
	Snrpa1	blue									Mmp16	blue									Mef2c	blue
	Pcdha5	blue									Gjd2	blue									Megf9	blue
	Mre11a	blue									Mapk6	blue									Mex3c	blue
	Xylt1	blue									Gba	blue									Mfap3	blue
	Tmcc2	blue									Nanos1	blue									Mfsd11	blue
	Paqr3	blue									Kcna4	blue									Mfsd14a	blue
	Kdm1a	blue									Unc5c	blue									Mfsd14b	blue
	Cr1l	blue									Mon1a	blue									Mfsd6	blue
	Tbc1d8b	blue									Nat6	blue									Mib1	blue
	Zfp526	blue									Maob	blue									Mief1	blue
	Maml3	blue									Wdr37	blue									Mindy2	blue
	Tada1	blue									Mme	blue									Mkln1	blue
	Gm9839	blue									Sugp1	blue									Mllt3	blue
	Bbs1	blue									Zbtb26	blue									Mocos	blue
	Tmtc2	blue									Acadsb	blue									Mphosph8	blue
	Pcdhga3	blue									Sel1l	blue									Mphosph9	blue
	Amer2	blue									Ccdc90b	blue									Mtmr2	blue
	Plxna4	blue									Slc4a4	blue									Mtpn	blue
	Rnf123	blue									Mb21d2	blue									Mturn	blue
	Slc7a14	blue									Trpm4	blue									Mus81	blue
	Arhgap18	blue									Wbscr22	blue									Mynn	blue
	Kif22	blue									Magi3	blue									Myo5a	blue
	Cdk2ap1	blue									Pank4	blue									Nadk2	blue
	Zdhhc3	blue									Gm16185	blue									Nalcn	blue
	Nudt21	blue									Lrp12	blue									Napb	blue
	Gm12276	blue									Vhl	blue									Nbeal1	blue
	Dido1	blue									Fktn	blue									Nbr1	blue
	Zfp280b	blue									Zfp619	blue									Nceh1	blue
	Xpo4	blue									Sertad2	blue									Ncoa7	blue
	Pcdhga1	blue									2510009E07Rik	blue									Ncs1	blue
	Aldh5a1	blue									Zmpste24	blue									Ndfip1	blue
	Dhx30	blue									Il33	blue									Negr1	blue
	Wdcp	blue									Ccdc13	blue									Nek7	blue
	Dnajc27	blue									Rnf166	blue									Neto1	blue
	Exoc2	blue									Klhl12	blue									Nipa1	blue
	Bmp6	blue									St8sia3	blue									Nipal3	blue
	Fam149b	blue									Eri1	blue									Nkrf	blue
	Fkbp15	blue									Zeb2	blue									Nol8	blue
	Gale	blue									Gm12696	blue									Nono	blue
	Tbck	blue									Phf20	blue									Nop56	blue
	Bcap31	blue									Lrp1b	blue									Npc1	blue
	Pcdhgb2	blue									Nop53	blue									Nphp3	blue
	Hlcs	blue									Ecsit	blue									Nptx1	blue
	Slc16a14	blue									Dcaf6	blue									Nr3c1	blue
	Ddx18	blue									Ppp1r3d	blue									Nr3c2	blue
	Cdr1	blue									Dpp7	blue									Nrcam	blue
	D16Ertd472e	blue									Abca5	blue									Nrg3	blue
	Timm29	blue									Bcat2	blue									Nrip1	blue
	Katna1	blue									Vps37d	blue									Nrxn3	blue
	Bcl2l2	blue									Tarsl2	blue									Nup50	blue
	Tmem131	blue									Mxi1	blue									Opa1	blue
	Cdh6	blue									Nme7	blue									Osbp	blue
	Pcdhga4	blue									Plpp6	blue									Osbpl11	blue
	Cobl	blue									Gtpbp4	blue									Osbpl8	blue
	Klhl5	blue									Cpxm1	blue									Otud6b	blue
	Zbtb14	blue									Ptch1	blue									Oxr1	blue
	Cabyr	blue									Bcl2	blue									Paip2b	blue
	Fan1	blue									Rpap3	blue									Pak2	blue
	Htr5a	blue									Ext1	blue									Pak3	blue
	Igsf9b	blue									Acot8	blue									Pam	blue
	Fam13c	blue									Shd	blue									Papd5	blue
	Specc1	blue									Bhlhe41	blue									Papolg	blue
	BC005561	blue									Nlgn3	blue									Parm1	blue
	Comtd1	blue									Lrp6	blue									Parp11	blue
	Polb	blue									Arhgap20	blue									Pbrm1	blue
	Sephs2	blue									Sqle	blue									Pcdh7	blue
	Nsmaf	blue									Txndc12	blue									Pcdh9	blue
	Actg1	blue									Skiv2l2	blue									Pclo	blue
	Fam168b	blue									Rnf130	blue									Pcm1	blue
	Erich1	blue									Wdr54	blue									Pcnx4	blue
	Zfp511	blue									Hus1	blue									Pcsk2	blue
	Slc25a51	blue									Btf3l4	blue									Pcyt1a	blue
	Huwe1	blue									Foxo1	blue									Pde1a	blue
	Ganab	blue									Rbm41	blue									Pdha1	blue
	Pigh	blue									Rab27b	blue									Pdpk1	blue
	Abl2	blue									Nt5c3	blue									Pds5b	blue
	Card19	blue									Car8	blue									Pdzd8	blue
	Tmem199	blue									Atat1	blue									Pfkfb4	blue
	Fzd4	blue									Ttc30a1	blue									Pgap1	blue
	Setd2	blue									Gm14325	blue									Pgr	blue
	Smap2	blue									Ldb2	blue									Phf6	blue
	Ndst4	blue									Wdr35	blue									Pibf1	blue
	Zfp619	blue									Ppm1e	blue									Pid1	blue
	Slc41a1	blue									6430511E19Rik	blue									Pik3cb	blue
	Dnaja3	blue									Zfp707	blue									Pik3r3	blue
	Erich6	blue									Gm38104	blue									Pja2	blue
	Pnma2	blue									Dusp19	blue									Pkp4	blue
	1600002H07Rik	blue									Usp15	blue									Plcb1	blue
	1600020E01Rik	blue									Rpusd3	blue									Plcl1	blue
	Ep300	blue									Mxd4	blue									Plekha5	blue
	Erap1	blue									Lyl1	blue									Plppr5	blue
	Abca3	blue									Sec23b	blue									Plxnb3	blue
	Mettl4	blue									Rabl3	blue									Pnpla8	blue
	Exoc1	blue									Mtmr14	blue									Ppfia2	blue
	Gramd1c	blue									Tlr3	blue									Pphln1	blue
	5031434O11Rik	blue									Htr1b	blue									Ppig	blue
	Gm38157	blue									Rgs2	blue									Ppm1a	blue
	Pcdhgb4	blue									Rin2	blue									Ppm1e	blue
	Atp5h	blue									Stk4	blue									Ppp1r7	blue
	Maml1	blue									Naprt	blue									Ppp1r9a	blue
	Peg10	blue									Hectd2	blue									Ppp2r2b	blue
	Usp22	blue									Pls3	blue									Ppp2r3a	blue
	Gm37829	blue									Kbtbd2	blue									Ppp2r5c	blue
	Ttc17	blue									Taf8	blue									Ppp2r5e	blue
	Gm37999	blue									Cbx6	blue									Ppp4r1	blue
	Tgds	blue									Fibp	blue									Ppp4r2	blue
	Slc6a6	blue									Pde8b	blue									Pqlc2	blue
	Hmces	blue									Slc44a1	blue									Prickle2	blue
	Gbf1	blue									Dck	blue									Prkaa1	blue
	S100a13	blue									Rps6kl1	blue									Prkacb	blue
	Sox4	blue									Nrg3	blue									Prkar1a	blue
	Tmem189	blue									Nelfb	blue									Prkci	blue
	Ebpl	blue									Edem2	blue									Prpf18	blue
	Ophn1	blue									Steap2	blue									Prps1l3	blue
	Zfp12	blue									Pank1	blue									Prr3	blue
	Ndufa12	blue									Ints14	blue									Psd3	blue
	Ybx3	blue									Ddx41	blue									Psmd11	blue
	Syne4	blue									Plk5	blue									Ptpn4	blue
	Zfp646	blue									Ildr2	blue									Ptprg	blue
	Rptor	blue									Dclk3	blue									Ptprr	blue
	Snx29	blue									Plcl1	blue									Pum2	blue
	Dph6	blue									Snx7	blue									Pura	blue
	Ksr2	blue									Gm37696	blue									Purb	blue
	Amer3	blue									Uba52	blue									Rab10	blue
	Spata4	blue									Cnot11	blue									Rab11fip2	blue
	Man2a2	blue									Ttpal	blue									Rab22a	blue
	Prmt9	blue									Dlgap1	blue									Rab33b	blue
	Sprtn	blue									Rundc1	blue									Rab34	blue
	Dph1	blue									Tsc22d1	blue									Rab5a	blue
	Scand1	blue									Spint2	blue									Rab8b	blue
	Pcdhga12	blue									Gli3	blue									Rabgap1	blue
	Tnfaip1	blue									Epha3	blue									Rad23b	blue
	Eif2ak1	blue									Alkbh6	blue									Ranbp2	blue
	Kmt5b	blue									Gm12346	blue									Rap2a	blue
	Gm37607	blue									Sass6	blue									Rap2c	blue
	Zer1	blue									Zfp180	blue									Rasa4	blue
	Hira	blue									Ggt5	blue									Rasgrp1	blue
	Ep400	blue									Thnsl1	blue									Rb1cc1	blue
	Zdhhc23	blue									Pdp1	blue									Rbm15b	blue
	Cnnm1	blue									Tap2	blue									Rce1	blue
	Rnf149	blue									Cdk20	blue									Reps2	blue
	Copz2	blue									Dcaf17	blue									Rfx3	blue
	Acvr1	blue									Sema3d	blue									Rgs4	blue
	Fam129c	blue									Kifc5b	blue									Rims1	blue
	Katnal1	blue									G3bp1	blue									Ripor2	blue
	Helz	blue									Cdc42se2	blue									Rmnd5a	blue
	Gpatch11	blue									Pigg	blue									Rnf115	blue
	Etfdh	blue									Wdr46	blue									Rnf145	blue
	Copa	blue									Fech	blue									Rnf146	blue
	Sp1	blue									Dis3	blue									Rnf149	blue
	2410131K14Rik	blue									Gstcd	blue									Rnf166	blue
	Gm38020	blue									Aass	blue									Rnf168	blue
	Polr3b	blue									Slc25a19	blue									Rnf219	blue
	Coq7	blue									Nudt8	blue									Rnf6	blue
	Dusp4	blue									Oxsm	blue									Rock2	blue
	Klf13	blue									Insig1	blue									Rorb	blue
	Lat	blue									BC005561	blue									Rp2	blue
	Nkain3	blue									Ifngr1	blue									Rpe	blue
	Gm5577	blue									Kdm7a	blue									Rprd1b	blue
	Klhl21	blue									Lgi1	blue									Rspry1	blue
	Cdk13	blue									Prkd3	blue									Rundc3a	blue
	Hrasls	blue									8030462N17Rik	blue									Runx1t1	blue
	Kri1	blue									Peli1	blue									Rwdd4a	blue
	Samd12	blue									Nr1h3	blue									Samd8	blue
	Hint3	blue									Epha7	blue									Sbno1	blue
	E230016M11Rik	blue									Ocel1	blue									Scaf11	blue
	Pcdhgb1	blue									Rhbdd1	blue									Scaper	blue
	Ppargc1b	blue									Emp3	blue									Scd2	blue
	Ddt	blue									Utrn	blue									Schip1	blue
	Lsm2	blue									Slitrk6	blue									Scrn1	blue
	Tmbim4	blue									Jakmip2	blue									Sec23a	blue
	Pcdhga2	blue									Elovl6	blue									Selenoi	blue
	Actr5	blue									Clcn5	blue									Sertad2	blue
	2810049E08Rik	blue									Agbl3	blue									Sgip1	blue
	Cnih4	blue									Kyat1	blue									Sh3kbp1	blue
	Fbxl14	blue									Tspan2	blue									Shisa6	blue
	Lrriq1	blue									Gabra5	blue									Shoc2	blue
	4833439L19Rik	blue									Ankrd9	blue									Shroom2	blue
	Plekhm3	blue									Heph	blue									Sirpa	blue
	Arfgef2	blue									Lrwd1	blue									Six5	blue
	Eif4e2	blue									Kcnj16	blue									Skil	blue
	Gde1	blue									Pdlim5	blue									Slc17a6	blue
	Zbtb34	blue									Dcaf12l2	blue									Slc1a2	blue
	Rhof	blue									Homez	blue									Slc24a2	blue
	Npepps	blue									Slc7a2	blue									Slc25a46	blue
	Amz2	blue									Rnf219	blue									Slc26a6	blue
	Phlpp2	blue									Prr16	blue									Slc30a1	blue
	Hadha	blue									Zfp521	blue									Slc30a4	blue
	B4galt3	blue									Mtg2	blue									Slc30a7	blue
	Ppil3	blue									Opcml	blue									Slc35a5	blue
	Txn1	blue									Snapc2	blue									Slc35f1	blue
	Pcsk1	blue									Zc3h11a	blue									Slc37a3	blue
	Adra1a	blue									Efr3a	blue									Slc39a1	blue
	Nrarp	blue									Ptp4a1	blue									Slc39a10	blue
	6430548M08Rik	blue									Disp3	blue									Slc39a13	blue
	Tma16	blue									Kctd12b	blue									Slc5a3	blue
	Peli2	blue									Mst1r	blue									Slc9a6	blue
	1700120C14Rik	blue									Kcnk2	blue									Slco4a1	blue
	Sdhaf1	blue									Zfp518b	blue									Slitrk4	blue
	Rabif	blue									Epyc	blue									Slk	blue
	Gm26631	blue									Kmt2c	blue									Slmap	blue
	Dusp12	blue									Pus1	blue									Smad2	blue
	Rcc1l	blue									Prrx1	blue									Smap2	blue
	Kat6b	blue									Rnpc3	blue									Smarca2	blue
	Caln1	blue									Hmgxb4	blue									Smg8	blue
	G630016G05Rik	blue									Ogfrl1	blue									Snap91	blue
	Tmod4	blue									Pck2	blue									Snd1	blue
	Washc4	blue									Wls	blue									Snw1	blue
	Zfp407	blue									Cept1	brown									Snx13	blue
	Plod2	blue									Skp1a	brown									Snx25	blue
	Wdr45b	blue									Srsf10	brown									Snx27	blue
	Tmem28	blue									Sec62	brown									Sod2	blue
	AW551984	blue									Bclaf1	brown									Sox5	blue
	Imp4	blue									Ppid	brown									Spag9	blue
	Riox2	blue									Sept2	brown									Sphkap	blue
	Mettl23	blue									Hdac2	brown									Spin1	blue
	Cst3	blue									Sub1	brown									Spire1	blue
	Gm20627	blue									2310035C23Rik	brown									Spock3	blue
	Frg1	blue									Cacybp	brown									Spopl	blue
	Gm15601	blue									Ier3ip1	brown									Sppl3	blue
	Pold3	blue									Ptbp2	brown									Spred1	blue
	Gm12655	blue									Papola	brown									Spty2d1	blue
	Stx3	blue									Crls1	brown									Srp72	blue
	Snrpd2	brown									Tmco1	brown									Srr	blue
	Timm13	brown									Rsrc2	brown									Ss18l1	blue
	Atp6v0b	brown									Morf4l2	brown									St5	blue
	Ndufb7	brown									Eloc	brown									St6galnac5	blue
	Bax	brown									Rab11a	brown									St8sia3	blue
	Cops9	brown									C1d	brown									Stag2	blue
	Rpl27	brown									Cnot7	brown									Stam2	blue
	Nedd8	brown									Hikeshi	brown									Stau2	blue
	Uqcrq	brown									Zfp938	brown									Stk4	blue
	Romo1	brown									Hsf2	brown									Stt3a	blue
	Anapc11	brown									Phip	brown									Sv2b	blue
	Elob	brown									Ergic2	brown									Svip	blue
	Ndufa13	brown									Cnot2	brown									Synm	blue
	Commd4	brown									Paip1	brown									Taf1	blue
	Cox6a1	brown									Psmd12	brown									Tanc2	blue
	Ndufa2	brown									Tceal9	brown									Tars2	blue
	Ndufa11	brown									Zfand6	brown									Tarsl2	blue
	Uqcr11	brown									Psma3	brown									Tcaf1	blue
	Clpp	brown									Map4k5	brown									Tcf4	blue
	Fau	brown									Txnl1	brown									Tdrkh	blue
	Ndufv1	brown									Eny2	brown									Terf2ip	blue
	Uqcr10	brown									Arxes2	brown									Tgoln1	blue
	Serp2	brown									Nap1l1	brown									Tgs1	blue
	Ndufv3	brown									Vps54	brown									Thsd1	blue
	Ndufa7	brown									Zfp944	brown									Tigd2	blue
	Rabac1	brown									Emc2	brown									Timm44	blue
	D8Ertd738e	brown									Strn3	brown									Tle6	blue
	Atp5j2	brown									Lrch2	brown									Tlk1	blue
	Ndufa3	brown									Orc4	brown									Tm9sf3	blue
	Tssc4	brown									Capn7	brown									Tma16	blue
	Ccdc124	brown									Ranbp9	brown									Tmed10	blue
	Pmm1	brown									Smndc1	brown									Tmed5	blue
	Ndufaf3	brown									U2surp	brown									Tmed7	blue
	Chchd6	brown									Ube2b	brown									Tmed8	blue
	Ubl5	brown									Rbm18	brown									Tmem106b	blue
	Gtf2f1	brown									Srpk2	brown									Tmem120b	blue
	Ppp1r11	brown									Cnep1r1	brown									Tmem167b	blue
	Atp5k	brown									Cnbp	brown									Tmem168	blue
	Lamtor4	brown									Nemf	brown									Tmem170b	blue
	Rpl41	brown									Snrpb2	brown									Tmem209	blue
	Abhd16a	brown									Selenof	brown									Tmem56	blue
	Ndufa6	brown									Sumo1	brown									Tmem64	blue
	Polr2e	brown									Txndc9	brown									Tmem74b	blue
	Rpl35	brown									BC005537	brown									Tnfrsf21	blue
	Cox14	brown									Dcun1d5	brown									Tnfrsf4	blue
	Arl6ip4	brown									Eid1	brown									Tns3	blue
	Chmp2a	brown									Mbnl1	brown									Togaram1	blue
	Rps28	brown									Rbm26	brown									Tollip	blue
	Cox6b1	brown									Sar1b	brown									Tomm20	blue
	Lsm7	brown									Ccdc43	brown									Tomm70a	blue
	Rpl11	brown									Zfp62	brown									Topors	blue
	Rpl31	brown									Rnf138	brown									Tpgs2	blue
	Psmd4	brown									Rab12	brown									Tppp	blue
	B3gat3	brown									Tbc1d12	brown									Trabd	blue
	Mrps7	brown									Ythdc1	brown									Trhde	blue
	Ergic3	brown									Fbxl3	brown									Trim37	blue
	Tecr	brown									Mrps22	brown									Trip4	blue
	Rpl38	brown									Atrx	brown									Trove2	blue
	Matk	brown									Ube2d2a	brown									Trpm4	blue
	Higd2a	brown									Ddx5	brown									Tsen54	blue
	Fis1	brown									Arxes1	brown									Tspan13	blue
	Atg101	brown									Ngly1	brown									Tspyl4	blue
	Qtrt1	brown									Nudt10	brown									Tspyl5	blue
	Rpl8	brown									Eif3e	brown									Tsr1	blue
	Ndufs8	brown									Psmd14	brown									Ttbk2	blue
	Cdc37	brown									Snrnp27	brown									Ttc9c	blue
	Polr2l	brown									Hnrnpu	brown									Ttll7	blue
	Cyc1	brown									Ube2e3	brown									Txndc5	blue
	Ndufb9	brown									6720427I07Rik	brown									Uba6	blue
	Tonsl	brown									Taf1d	brown									Ube2e1	blue
	Secisbp2l	brown									Nr1d2	brown									Ube2k	blue
	Gng3	brown									Smc6	brown									Ubfd1	blue
	Bad	brown									Itm2b	brown									Ubl3	blue
	Ndufa4	brown									Myo9a	brown									Ubqln1	blue
	Ndufa1	brown									Mblac2	brown									Ubr1	blue
	Bola2	brown									Mob4	brown									Ubxn2b	blue
	Mrps24	brown									Rbm25	brown									Ubxn4	blue
	Swi5	brown									Cetn3	brown									Ubxn7	blue
	Mea1	brown									Med6	brown									Uckl1	blue
	Use1	brown									Laptm4a	brown									Uhmk1	blue
	B9d2	brown									Herc4	brown									Uhrf1bp1l	blue
	Ndufb11	brown									Tra2b	brown									Ulk2	blue
	Mydgf	brown									Psma4	brown									Usp15	blue
	Trir	brown									Atp11c	brown									Usp27x	blue
	Lamtor1	brown									Ythdf3	brown									Usp46	blue
	Ndufb3	brown									Arfgap1	brown									Vamp7-ps	blue
	Gpx4	brown									Pkn2	brown									Vapb	blue
	Trmt112	brown									Polr3k	brown									Virma	blue
	Naxe	brown									Pcbp4	brown									Vldlr	blue
	Smim12	brown									Eif2a	brown									Vps13a	blue
	Bex3	brown									1110004F10Rik	brown									Vps26b	blue
	Nup85	brown									Ppp4r3a	brown									Vps35	blue
	Park7	brown									Srsf7	brown									Vstm2a	blue
	Rpp21	brown									Thoc7	brown									Wac	blue
	Psmb6	brown									Far1	brown									Wapl	blue
	Atp6v1f	brown									Sms	brown									Wbp1	blue
	Cdk5	brown									Xylt2	brown									Wbscr22	blue
	Rps14	brown									Tmem165	brown									Wdr26	blue
	Tmem258	brown									Fam174a	brown									Wdr35	blue
	Pigyl	brown									Psma1	brown									Wdr7	blue
	Tsen34	brown									Katnbl1	brown									Wnk3	blue
	Tomm7	brown									Zfp942	brown									Wwp1	blue
	Rpl18a	brown									Ggnbp2	brown									Xk	blue
	Sh3glb1	brown									Papd4	brown									Xpot	blue
	Stmn3	brown									Fcho2	brown									Yipf6	blue
	Nenf	brown									Tmpo	brown									Ylpm1	blue
	2010107E04Rik	brown									Tmx1	brown									Ypel4	blue
	Sgta	brown									Tmem60	brown									Zbtb38	blue
	Nt5m	brown									Trappc13	brown									Zbtb41	blue
	Pfdn5	brown									BC003331	brown									Zbtb6	blue
	Rpl19	brown									Rock1	brown									Zc3h12b	blue
	Atp5j	brown									G2e3	brown									Zc3h14	blue
	Banf1	brown									Vps29	brown									Zdhhc15	blue
	Iscu	brown									Phtf2	brown									Zdhhc21	blue
	Cox7a2	brown									Pias2	brown									Zfand2a	blue
	Rpl36	brown									Mterf3	brown									Zfp106	blue
	Rps21	brown									Zfp292	brown									Zfp128	blue
	Ranbp3	brown									Thoc1	brown									Zfp148	blue
	Abtb1	brown									Vps50	brown									Zfp180	blue
	Mtch1	brown									A830080D01Rik	brown									Zfp219	blue
	Rps29	brown									Tmem161b	brown									Zfp322a	blue
	Cox8a	brown									Yod1	brown									Zfp37	blue
	Rps5	brown									Clpx	brown									Zfp455	blue
	Hagh	brown									Tapt1	brown									Zfp563	blue
	Pfdn1	brown									Zdhhc13	brown									Zfp597	blue
	Dmap1	brown									Dmd	brown									Zfp748	blue
	Eif3i	brown									Celf4	brown									Zfp770	blue
	2410015M20Rik	brown									Akirin2	brown									Zfp790	blue
	Atp5g1	brown									H3f3a-ps1	brown									Zfp821	blue
	Nme1	brown									Mcts1	brown									Zfp87	blue
	Rps17	brown									Ptpn2	brown									Zfp9	blue
	Ruvbl2	brown									Dhx40	brown									Zfp91	blue
	Uqcc2	brown									Pak1ip1	brown									Zfr	blue
	Tex264	brown									Ccni	brown									Zfyve27	blue
	Pds5b	brown									Rpl22l1	brown									Zhx1	blue
	Tmed9	brown									Uqcrb	brown									Zik1	blue
	Timm10	brown									2610301B20Rik	brown									Zmat3	blue
	Dohh	brown									Zfx	brown									Znrf2	blue
	Uqcrh	brown									Metap2	brown									Zxdb	blue
	2810428I15Rik	brown									Erbin	brown									Zyg11b	blue
	Mrpl12	brown									Glrx3	brown									Sept3	brown
	Asna1	brown									Naa20	brown									Sept11	brown
	Aldoa	brown									Dnajb6	brown									2810004N23Rik	brown
	Zfpl1	brown									Rsbn1l	brown									2900026A02Rik	brown
	Srp14	brown									Uchl3	brown									2900097C17Rik	brown
	Mrps11	brown									Smarca1	brown									4632415L05Rik	brown
	Mrpl54	brown									Arid4b	brown									6430548M08Rik	brown
	Mrpl11	brown									Brix1	brown									A430110L20Rik	brown
	Ndufa5	brown									Rab9	brown									Abca3	brown
	Pex16	brown									Fbxo8	brown									Acly	brown
	Babam1	brown									Srsf3	brown									Acvr1b	brown
	Ndufb5	brown									Bhlhb9	brown									Adarb1	brown
	Rack1	brown									Cops5	brown									Adcy5	brown
	Timm50	brown									Mtpap	brown									Adcy9	brown
	Dpm3	brown									Ttc14	brown									Adcyap1r1	brown
	Dynlrb1	brown									Gtf2a2	brown									Add2	brown
	Polr2j	brown									Pno1	brown									Adgrl3	brown
	Rplp1	brown									Abhd10	brown									Adprhl2	brown
	Atp5o	brown									Sptssa	brown									Adra1a	brown
	Dctn2	brown									Scn3a	brown									AF529169	brown
	Sf3b5	brown									Ndufv2	brown									Aff2	brown
	Rpl23	brown									Cript	brown									Agl	brown
	Elof1	brown									Zfp711	brown									Ago1	brown
	Egln2	brown									Acer3	brown									Ago2	brown
	Tomm5	brown									Srp19	brown									Agpat3	brown
	Tsr3	brown									Hltf	brown									Akap10	brown
	Ssna1	brown									Med21	brown									Alg10b	brown
	Sqstm1	brown									Gm20604	brown									Alkbh8	brown
	Npdc1	brown									Fsd1l	brown									Als2	brown
	Pam16	brown									Lrrtm4	brown									Ank3	brown
	Ndufb6	brown									Paip2	brown									Ankrd13c	brown
	Polr2i	brown									Chd1	brown									Ankrd34a	brown
	Mrps16	brown									Ndufaf4	brown									Anks1b	brown
	Sema4d	brown									Bbip1	brown									Apba1	brown
	E4f1	brown									Lsm5	brown									Apba2	brown
	Fam104a	brown									Zfp260	brown									Apcdd1	brown
	Borcs8	brown									Hmgn3	brown									Aplp2	brown
	Ssr4	brown									Prdx3	brown									App	brown
	Irs1	brown									Psmd6	brown									Arel1	brown
	Coq10a	brown									Cstf3	brown									Arfgef3	brown
	Zc3hc1	brown									Elmod2	brown									Arhgap35	brown
	Etfb	brown									Scfd1	brown									Arhgap5	brown
	Adcy3	brown									Eef1akmt2	brown									Arhgef12	brown
	Bex1	brown									Zfp606	brown									Arhgef28	brown
	Oaz1	brown									E2f5	brown									Arid1b	brown
	Gpatch4	brown									Rbms1	brown									Arid5b	brown
	Tmem256	brown									Tmem87a	brown									Arl10	brown
	Sult4a1	brown									Jmjd1c	brown									Arrb1	brown
	Scyl1	brown									Mrpl32	brown									Arsb	brown
	Bola1	brown									Dnaja1	brown									Ash1l	brown
	Tsta3	brown									Mphosph10	brown									Atm	brown
	Ube2s	brown									Zfp81	brown									Atp1b2	brown
	Rpl37a	brown									Socs6	brown									Atp2b3	brown
	Sdhb	brown									Eef1e1	brown									Atp2b4	brown
	Ccdc12	brown									Rasa1	brown									Atp6v0b	brown
	Erbin	brown									Fam76b	brown									Atp7a	brown
	Rpl32	brown									D030056L22Rik	brown									Atp8a2	brown
	Dad1	brown									Ice2	brown									Atxn1l	brown
	1500011B03Rik	brown									Pcmtd2	brown									AU040320	brown
	Rps23	brown									Gabpa	brown									AW551984	brown
	Nat14	brown									Gt(ROSA)26Sor	brown									B930095G15Rik	brown
	Emc9	brown									2610044O15Rik8	brown									Baalc	brown
	Psme2	brown									Azi2	brown									Bcl2l13	brown
	Rpl36al	brown									Tcerg1	brown									Bcl7a	brown
	Rapgef4	brown									Zfp13	brown									Bptf	brown
	Rpsa	brown									Smc4	brown									Bsn	brown
	Tmem160	brown									Ccar1	brown									Btbd11	brown
	Tm2d3	brown									Twf1	brown									Btbd7	brown
	Atox1	brown									Zrsr2	brown									C1galt1	brown
	Grcc10	brown									Ralgapa1	brown									C1ql3	brown
	Hspbp1	brown									Rbm7	brown									C530008M17Rik	brown
	Dock1	brown									Rpp30	brown									C77370	brown
	Tubb3	brown									Krit1	brown									Cadm3	brown
	Thap4	brown									Zer1	brown									Camk2a	brown
	Psma7	brown									Rgs17	brown									Camk2b	brown
	Sdf2	brown									Npm1	brown									Camsap1	brown
	Exosc7	brown									Zfp160	brown									Capn5	brown
	Rps7	brown									Wdr12	brown									Cbl	brown
	Pcgf1	brown									Ccnl1	brown									Ccdc107	brown
	Idh3g	brown									Pcmtd1	brown									Ccdc191	brown
	Psmb7	brown									Nfia	brown									Ccdc85c	brown
	Rps15	brown									Tceal1	brown									Cdh2	brown
	Ddost	brown									Tbca	brown									Cdh4	brown
	Nsfl1c	brown									Gm12940	brown									Cdh6	brown
	Pick1	brown									Hnrnpa2b1	brown									Cdh8	brown
	BC031181	brown									Commd3	brown									Cdk12	brown
	Cfl1	brown									Zfp994	brown									Cdkl5	brown
	Ndufaf8	brown									Rbm48	brown									Celf1	brown
	Emg1	brown									Abraxas2	brown									Cep192	brown
	Zcchc17	brown									Spast	brown									Cep85l	brown
	Rpl13a	brown									Rpgr	brown									Chrna7	brown
	Hemk1	brown									Ints6	brown									Chtf8	brown
	Atpif1	brown									Ranbp1	brown									Clstn1	brown
	Sem1	brown									Nol7	brown									Clvs1	brown
	Suclg1	brown									Zfp280d	brown									Cmtm4	brown
	Fam96b	brown									Smarce1	brown									Cnksr2	brown
	Slc25a4	brown									Ppil4	brown									Cntn5	brown
	Rps27	brown									Phf20l1	brown									Cobl	brown
	Minos1	brown									Lrif1	brown									Commd4	brown
	Atp5g2	brown									Sav1	brown									Coq4	brown
	Dvl1	brown									Adss	brown									Coro1c	brown
	Rps27a	brown									Rbm39	brown									Coro2b	brown
	Gabarap	brown									Snapc3	brown									Cpeb3	brown
	Uqcrb	brown									Chchd3	brown									Crkl	brown
	Mrpl24	brown									Gorab	brown									Cul4b	brown
	Rpl9	brown									Xpo1	brown									Cyb5d1	brown
	Polr1c	brown									Snrpe	brown									Cyfip2	brown
	Klc4	brown									Rfk	brown									D430041D05Rik	brown
	Prelid1	brown									Chac2	brown									Daam1	brown
	Trim3	brown									Mier1	brown									Dcc	brown
	Rpl37	brown									Mycbp	brown									Ddn	brown
	Lmtk2	brown									Txndc15	brown									Dgkg	brown
	Timm8b	brown									Rad17	brown									Dgkh	brown
	Tmem208	brown									Zfp946	brown									Dhcr24	brown
	Rfc2	brown									Srek1ip1	brown									Dhx30	brown
	Krtcap2	brown									Spcs2	brown									Dhx8	brown
	Fnip2	brown									Csgalnact2	brown									Disp2	brown
	Lrwd1	brown									Ppp2r3c	brown									Dlg2	brown
	Ckmt1	brown									Clasp2	brown									Dock1	brown
	Cend1	brown									Hmgcll1	brown									Dock4	brown
	Tubb2a	brown									Krcc1	brown									Dok4	brown
	Cdkn2d	brown									Cryzl1	brown									Dok6	brown
	Urm1	brown									Zrsr1	brown									Dpm2	brown
	Nf1	brown									Pfdn4	brown									Dpp6	brown
	Prmt7	brown									Tmem183a	brown									Dpp8	brown
	Polr2g	brown									Vdac2	brown									Dscam	brown
	Akr1a1	brown									Gyg	brown									Dstyk	brown
	Prdx2	brown									Fopnl	brown									Dtymk	brown
	Naca	brown									Gnl3	brown									Dus2	brown
	Mrpl34	brown									Dnmt1	brown									Dusp3	brown
	Nhp2	brown									Rpf2	brown									Dusp4	brown
	Grpel1	brown									Dnajc8	brown									Dusp8	brown
	Selenoh	brown									Mocs2	brown									Dyrk2	brown
	Gapdh	brown									Zfp131	brown									E2f3	brown
	Smim26	brown									Fam135a	brown									Egr3	brown
	Pin4	brown									Bbs4	brown									Eif4ebp2	brown
	Psme1	brown									Tmem251	brown									Eif4g1	brown
	Ndufs2	brown									Hnrnpdl	brown									Elfn1	brown
	Sec13	brown									Caap1	brown									Elfn2	brown
	Ccdc28b	brown									Grik2	brown									Endov	brown
	Spag7	brown									Med7	brown									Epb41l1	brown
	Nubp2	brown									Kbtbd3	brown									Epg5	brown
	Fmc1	brown									Mtf2	brown									Epha6	brown
	Mrps9	brown									Rpl22	brown									Erc1	brown
	Med27	brown									Fahd1	brown									Ergic1	brown
	Clstn3	brown									Uri1	brown									Exoc4	brown
	Smap1	brown									Npat	brown									Exoc6	brown
	B930095G15Rik	brown									Slc25a40	brown									Exph5	brown
	Rps25	brown									Fam92a	brown									Fads2	brown
	Naa38	brown									Derl2	brown									Faim2	brown
	Cox6c	brown									Tmem126a	brown									Fam120c	brown
	Cct3	brown									Gtpbp10	brown									Fam126b	brown
	Mrpl30	brown									1700066M21Rik	brown									Fam131b	brown
	Psmc3	brown									Fam208a	brown									Fam135b	brown
	Pqbp1	brown									Ginm1	brown									Fam13b	brown
	Mrto4	brown									Wdr91	brown									Fam13c	brown
	Prdx5	brown									Tsga10	brown									Fam168b	brown
	Tpd52l2	brown									Slirp	brown									Fan1	brown
	Rps12	brown									Ttc19	brown									Farp2	brown
	Kat8	brown									Ube2q2	brown									Fasn	brown
	Inpp5k	brown									Lrrc40	brown									Faxc	brown
	Nudc	brown									Orc6	brown									Fbxl16	brown
	Rps20	brown									Purg	brown									Fbxw8	brown
	Rpl27a	brown									Ttc1	brown									Fgfr3	brown
	Ssr2	brown									Birc2	brown									Fhod3	brown
	Ubtd2	brown									Ift74	brown									Flrt1	brown
	Eif3g	brown									Son	brown									Fosl1	brown
	Selenom	brown									Bud31	brown									Frs2	brown
	Cops6	brown									Ighmbp2	brown									Fry	brown
	Rbx1	brown									Tdp2	brown									Fyn	brown
	Mrps26	brown									Hprt	brown									Fzd3	brown
	Hax1	brown									Arglu1	brown									Fzd4	brown
	Apc	brown									Mtch2	brown									Gabrb2	brown
	Ndufv2	brown									Pex2	brown									Gapvd1	brown
	Arpc3	brown									2300009A05Rik	brown									Garem1	brown
	Nsmce1	brown									Rbm12	brown									Gatad2b	brown
	Anapc2	brown									Mrps18c	brown									Gfod1	brown
	Nthl1	brown									Arfip1	brown									Gigyf2	brown
	Urod	brown									2310009A05Rik	brown									Glg1	brown
	Zmat2	brown									Stk26	brown									Glra3	brown
	Hdac11	brown									Aktip	brown									Glt8d2	brown
	Psmd13	brown									Hat1	brown									Glyr1	brown
	Rpl6	brown									Bcas2	brown									Gm1673	brown
	Mib2	brown									C330027C09Rik	brown									Gm17491	brown
	Zfp800	brown									Nfib	brown									Gm26805	brown
	Ccdc34	brown									Ap1s2	brown									Gm38104	brown
	Stx4a	brown									Evi5	brown									Gm4202	brown
	Thap3	brown									Chsy1	brown									Gm5124	brown
	Map1b	brown									Hmgn5	brown									Gm5499	brown
	Rps3	brown									Uchl5	brown									Gm8707	brown
	Abcb8	brown									Zcchc10	brown									Gpam	brown
	Gemin7	brown									Hace1	brown									Gpatch2l	brown
	Phf5a	brown									Immp1l	brown									Gpr135	brown
	Znrd1	brown									Spcs1	brown									Gpr165	brown
	Rtcb	brown									Lgr4	brown									Gpr176	brown
	Fdps	brown									Slc12a2	brown									Gpr63	brown
	Mrpl20	brown									Mrpl35	brown									Gprin3	brown
	Pgls	brown									Prpf38a	brown									Grid2	brown
	Porcn	brown									Mga	brown									Grik3	brown
	Mrpl21	brown									Trpm7	brown									Grin2a	brown
	Nt5c3b	brown									Gm12709	brown									Grin2b	brown
	Notch1	brown									Ythdc2	brown									Grin3a	brown
	Pold4	brown									Csnk2a1	brown									Gtpbp1	brown
	Pard6a	brown									Trim28	brown									Gucy1a2	brown
	Mien1	brown									Cul7	brown									Hcfc1	brown
	Sec11a	brown									Aida	brown									Hcn1	brown
	Mdp1	brown									Ddx50	brown									Hdlbp	brown
	Rpl39	brown									Ostc	brown									Heatr5b	brown
	Tmem222	brown									Arsk	brown									Hemk1	brown
	Armc6	brown									Tor1aip2	brown									Herc2	brown
	Mettl26	brown									Ppfia2	brown									Hhipl1	brown
	Gpx1	brown									Rpl15	brown									Hipk2	brown
	Snhg15	brown									Bbs5	brown									Hivep1	brown
	Pnck	brown									Dimt1	brown									Hivep3	brown
	Pank4	brown									Dazl	brown									Hk1	brown
	Cluap1	brown									Eif3m	brown									Htr2a	brown
	Cdk5rap3	brown									Hnrnph1	brown									Igf1r	brown
	Eef1b2	brown									Zfp273	brown									Igf2r	brown
	Coro1b	brown									Gtf2e2	brown									Igsf10	brown
	Rps6ka3	brown									Cenpc1	brown									Igsf9b	brown
	Naa20	brown									Cmc4	brown									Il6ra	brown
	Dph7	brown									1810022K09Rik	brown									Ipo7	brown
	Miga2	brown									Dpysl2	brown									Irs1	brown
	Mrpl42	brown									Denr	brown									Irs2	brown
	Aamdc	brown									Vdac3	brown									Isca2	brown
	Srp19	brown									Etfa	brown									Itpkb	brown
	Rpl4	brown									Smc5	brown									Itsn1	brown
	App	brown									Atp5c1	brown									Jade2	brown
	Leng9	brown									Evi5l	brown									Jmjd4	brown
	Pin1	brown									Thoc2	brown									Kantr	brown
	Nop10	brown									Bcar1	brown									Kat6a	brown
	Ppp5c	brown									Dnajc2	brown									Kcna2	brown
	Brms1	brown									Ndufb4	brown									Kcna3	brown
	2900093K20Rik	brown									Clk4	brown									Kcnb1	brown
	U2af1l4	brown									Fbxw4	brown									Kcnh1	brown
	Trnau1ap	brown									Clk1	brown									Kcnh5	brown
	Snrpg	brown									Chordc1	brown									Kcnj12	brown
	Tsfm	brown									Psma6	brown									Kcnj6	brown
	Fcf1	brown									Cdc16	brown									Kcnma1	brown
	Hipk2	brown									Gm17066	brown									Kcnq3	brown
	Tmed3	brown									Zmat1	brown									Kctd10	brown
	Ninj1	brown									Slain1	brown									Kctd16	brown
	Mtg2	brown									Vps37a	brown									Kctd21	brown
	Ccdc51	brown									Rbm4b	brown									Kdm2a	brown
	Cox7b	brown									Dpy30	brown									Kif26b	brown
	Faim2	brown									Prmt3	brown									Kif3c	brown
	Elmo2	brown									Anapc10	brown									Kin	brown
	Psmb10	brown									Ahctf1	brown									Klf3	brown
	Emc4	brown									Trappc6b	brown									Klf5	brown
	Dctpp1	brown									Sf3b6	brown									Klf7	brown
	Lcmt1	brown									Rbm4	brown									Klf9	brown
	Abcf3	brown									Frg1	brown									Klhl11	brown
	Tnik	brown									Pde3b	brown									Klhl28	brown
	Nudt9	brown									Fgfr1op	brown									Klhl3	brown
	Ntpcr	brown									AI987944	brown									Klhl34	brown
	Spr	brown									Rarb	brown									L1cam	brown
	Mecr	brown									Gphn	brown									Lancl3	brown
	Mrpl22	brown									Strbp	brown									Larp1	brown
	Cnpy2	brown									9930021J03Rik	brown									Lasp1	brown
	Gng13	brown									0610010F05Rik	brown									Lcor	brown
	Nob1	brown									Zfp53	brown									Lgi2	brown
	Hyal2	brown									Smim14	brown									Lmbrd2	brown
	2210013O21Rik	brown									Rpap2	brown									Lnpep	brown
	Psma4	brown									Gria4	brown									Lpin2	brown
	Wwc1	brown									Nrsn1	brown									Lrba	brown
	Timm17b	brown									Zfp101	brown									Lrfn5	brown
	Nosip	brown									Mier3	brown									Lrrc41	brown
	Rps8	brown									Scp2	brown									Lrrc59	brown
	Txn2	brown									Lyrm4	brown									Lrrc7	brown
	Rpl12	brown									Riok1	brown									Lrrc8b	brown
	Rpl22	brown									Sestd1	brown									Lrrc8d	brown
	Nxph1	brown									Sirt1	brown									Lrriq1	brown
	Dap3	brown									Osgin2	brown									Luzp2	brown
	Dus2	brown									Arl13b	brown									Map1a	brown
	Sirt3	brown									Slain2	brown									Map1b	brown
	Lsm4	brown									Fam208b	brown									Map3k13	brown
	Cdip1	brown									Gm16536	brown									Mapt	brown
	Ncaph2	brown									Hspb11	brown									Masp1	brown
	Pdcd2l	brown									Lrp10	brown									Med12l	brown
	Dctn6	brown									Cmpk1	brown									Meis2	brown
	Gprc5b	brown									Slc35b3	brown									Memo1	brown
	Plekhj1	brown									Nmt2	brown									Mfn2	brown
	Wdr45	brown									Dmtf1	brown									Mgrn1	brown
	Stoml2	brown									Ccdc58	brown									Mmaa	brown
	Rpusd1	brown									Fbxw7	brown									Mprip	brown
	Alg5	brown									Dnajc11	brown									Mrps15	brown
	Pet100	brown									Gm17102	brown									Mrs2	brown
	Atp5l	brown									Brdt	brown									Msi2	brown
	Myl6	brown									Csgalnact1	brown									Mta3	brown
	D10Jhu81e	brown									Gm11478	brown									Mtf1	brown
	Aimp1	brown									Pdcd5	brown									Mtmr9	brown
	Retreg2	brown									Tia1	brown									Mtor	brown
	Rps13	brown									Ndufb2	brown									Mtrr	brown
	Ndufb8	brown									Ppip5k2	brown									Myh10	brown
	Tmem50a	brown									Pbdc1	brown									Myo16	brown
	Zfp637	brown									Brwd1	brown									Naa10	brown
	Kif5a	brown									Zdhhc20	brown									Naa25	brown
	Zpr1	brown									Rapgef6	brown									Naa60	brown
	Cby1	brown									Ptges3	brown									Nav3	brown
	Prkrip1	brown									Rev3l	brown									Ncam2	brown
	Ccdc151	brown									Pnrc1	brown									Nckap1	brown
	Nhlrc2	brown									Mettl9	brown									Ncoa1	brown
	Ctsf	brown									Kdm1b	brown									Ncoa2	brown
	Selenok	brown									Kdsr	brown									Ncoa6	brown
	Dnajc8	brown									Ift80	brown									Ncor1	brown
	Pym1	brown									Carf	brown									Ndst1	brown
	Epb41l4aos	brown									Tyw5	brown									Ndufab1	brown
	Tmem161a	brown									Faf1	brown									Ndufc1	brown
	Slc27a4	brown									AW146154	brown									Ndufs7	brown
	Spcs1	brown									Cep295	brown									Nedd4	brown
	Dennd6a	brown									Gpcpd1	brown									Nedd4l	brown
	Samm50	brown									Ipo11	brown									Nek4	brown
	Mrpl58	brown									Ftx	brown									Nell2	brown
	Rpl13	brown									Trip12	brown									Nf1	brown
	Mrps21	brown									Mfsd8	brown									Nf2	brown
	Uqcrfs1	brown									Zfp2	brown									Nhlrc2	brown
	Myg1	brown									Zfp326	brown									Nipbl	brown
	Ing4	brown									Smim8	brown									Nkain1	brown
	Lsm3	brown									Ide	brown									Nlgn1	brown
	Ak2	brown									Caml	brown									Nol4	brown
	Rnf167	brown									Zfp810	brown									Nomo1	brown
	Tmem9	brown									Dnajc21	brown									Nos1	brown
	Coasy	brown									Rwdd1	brown									Nr2c2	brown
	Shisa5	brown									Fam214a	brown									Nrd1	brown
	Med11	brown									Gm14303	brown									Nsf	brown
	Eif2d	brown									Apool	brown									Nuak1	brown
	Magoh	brown									Phf14	brown									Nup214	brown
	Cstb	brown									Hpf1	brown									Nup85	brown
	43161	brown									Dst	brown									Nup98	brown
	Lrrc14	brown									Ghr	brown									Nwd1	brown
	Dclk2	brown									Gria3	brown									Nxph1	brown
	Ctxn2	brown									Pnpt1	brown									Oprd1	brown
	Ccm2	brown									Atp11b	brown									Osbpl10	brown
	Fn3k	brown									5930409G06Rik	brown									Osgep	brown
	Shisa6	brown									Sacs	brown									Palm2	brown
	Gba2	brown									1810026B05Rik	brown									Papd7	brown
	Chchd1	brown									Eed	brown									Paqr3	brown
	1500009C09Rik	brown									Mphosph6	brown									Pcdh10	brown
	Mlycd	brown									Zfp945	brown									Pcdha12	brown
	Crabp1	brown									9330159F19Rik	brown									Pcdha2	brown
	Tufm	brown									Tank	brown									Pcdha3	brown
	Gm16286	brown									Ikbip	brown									Pcdha5	brown
	Stk25	brown									Zfp472	brown									Pcdhac2	brown
	Mtg1	brown									Snhg4	brown									Pcdhga1	brown
	Kcnq3	brown									5530601H04Rik	brown									Pcdhga12	brown
	Tor1aip1	brown									Pigp	brown									Pcdhga2	brown
	Pithd1	brown									Ptpn12	brown									Pcdhga3	brown
	Atp2b4	brown									Slc29a2	brown									Pcdhga4	brown
	Vcl	brown									Sdhaf2	brown									Pcdhga5	brown
	Snrnp27	brown									Usp16	brown									Pcdhga6	brown
	Anapc7	brown									Zfp961	brown									Pcdhga7	brown
	Atp5b	brown									Zfp518a	brown									Pcdhga8	brown
	Flywch2	brown									Tpt1-ps3	brown									Pcdhga9	brown
	Psma6	brown									Sema4f	brown									Pcdhgb1	brown
	Rpl5	brown									Tatdn1	brown									Pcdhgb2	brown
	Rab26os	brown									Crem	brown									Pcdhgb4	brown
	Alas1	brown									Gm9843	brown									Pcdhgb5	brown
	Sel1l	brown									Trafd1	brown									Pcdhgb6	brown
	Gm16485	brown									Vamp3	brown									Pcdhgb7	brown
	Slc35b1	brown									Dfna5	brown									Pcdhgb8	brown
	Mrps18c	brown									Dtwd1	brown									Pcdhgc3	brown
	Commd3	brown									Rab26os	brown									Pcdhgc4	brown
	Dcaf13	brown									Toporsos	brown									Pcdhgc5	brown
	Ndufa9	brown									Foxn2	brown									Pcgf6	brown
	Nr2c2ap	brown									Ddx46	brown									Pcnt	brown
	Psmg3	brown									Rbm8a	brown									Pcnx	brown
	Tmsb4x	brown									Zfp788	brown									Pdcd6ip	brown
	Smim4	brown									Spata7	brown									Pde4b	brown
	Rpl7	brown									Sgcb	brown									Pde4d	brown
	Eef1akmt1	brown									Serf1	brown									Pde7b	brown
	Mettl22	brown									Trim59	brown									Pdpr	brown
	Plekhf2	brown									Slc12a4	brown									Pdxk	brown
	Stmn4	brown									Kctd6	brown									Peli3	brown
	Mob2	brown									Tipin	brown									Phactr3	brown
	Dcps	brown									Slc4a7	brown									Phlpp1	brown
	Rpl17	brown									Zzz3	brown									Pias1	brown
	Ltk	brown									Gm28151	brown									Pip4k2b	brown
	Tet3	brown									Dock11	brown									Plcxd3	brown
	Tma7	brown									Zfp386	brown									Plekhm3	brown
	Tril	brown									Msh6	brown									Plxna1	brown
	1110038B12Rik	brown									Gm43517	brown									Plxna4	brown
	Akr7a5	brown									Gm5415	brown									Pnmal1	brown
	Hsd17b10	brown									Rmdn1	brown									Pou3f3	brown
	Gm13436	brown									Poglut1	brown									Pou3f4	brown
	Trappc2l	brown									Scml2	brown									Ppm1f	brown
	Cbfa2t3	brown									Skp2	brown									Ppp1r12a	brown
	Gm14004	brown									Ric8a	brown									Ppp1r12b	brown
	Ndufc2	brown									Dync1h1	brown									Pptc7	brown
	Rabepk	brown									Cttn	brown									Prdm2	brown
	Psmg4	brown									Prg4	brown									Prepl	brown
	Ngdn	brown									Metap1	brown									Prkg1	brown
	Ndufs3	brown									Mum1l1	brown									Prpf8	brown
	Tm2d2	brown									Rab40b	brown									Prr14l	brown
	Znfx1	brown									Tbc1d25	brown									Prrc2c	brown
	Med31	brown									Acyp2	brown									Ptgfrn	brown
	Atp5c1	brown									Zfp715	brown									Ptprj	brown
	Zmat5	brown									Gm37773	brown									Ptprm	brown
	Psmb2	brown									Fermt2	brown									Ptprn2	brown
	Tusc2	brown									Dhfr	brown									Pygo1	brown
	Ddx56	brown									Gin1	brown									Rab11fip4	brown
	Ost4	brown									Upf3b	brown									Rap1gap2	brown
	Anapc13	brown									Kctd9	brown									Rapgef1	brown
	Slc25a14	brown									Mterf1a	brown									Rapgef2	brown
	Ebp	brown									Znrd1as	brown									Rapgef5	brown
	Rps27l	brown									Ptpmt1	brown									Raph1	brown
	Ddx24	brown									Efcab7	brown									Rasa3	brown
	Vamp2	brown									Elk4	brown									Rasgrf2	brown
	Ndufs4	brown									Sgk3	brown									Rbfox2	brown
	Myo10	brown									Nipsnap1	brown									Rbl2	brown
	BC004004	brown									Ankdd1b	brown									Rbm19	brown
	Ethe1	brown									Zfand1	brown									Rbm4b	brown
	Hectd2	brown									Tmem29	brown									Reln	brown
	Rpl36a	brown									Sycp2	brown									Rgl1	brown
	3110040N11Rik	brown									Nup54	brown									Rgmb	brown
	Upf3a	brown									Nek1	brown									Rnf165	brown
	Arpc4	brown									Ap4s1	brown									Rnf214	brown
	Nudt8	brown									Ints13	brown									Rnf24	brown
	Syn1	brown									P2ry1	brown									Robo1	brown
	Trappc1	brown									Rictor	brown									Robo2	brown
	Mrpl3	brown									Mrps14	brown									Rprd1a	brown
	Cfap20	brown									AI314180	brown									Rprd2	brown
	Brk1	brown									Gm10925	brown									Rybp	brown
	Itga6	brown									Zfp940	brown									S100pbp	brown
	Nrbp1	brown									Sorbs2	brown									Samd5	brown
	Med4	brown									Eri2	brown									Satb2	brown
	Bloc1s1	brown									Irak1bp1	brown									Scaf8	brown
	Aasdhppt	brown									Pcp4	brown									Scarb2	brown
	Ptprb	brown									Cspg4	brown									Sec14l1	brown
	Med21	brown									Atp5f1	brown									Sec22c	brown
	Ddit3	brown									Gpc1	brown									Secisbp2l	brown
	Pnpo	brown									Jade3	brown									Sema4d	brown
	Gpn1	brown									Arhgap6	brown									Senp5	brown
	Med29	brown									3110009E18Rik	brown									Sephs2	brown
	Psmb3	brown									Rnf170	brown									Sesn3	brown
	BC003965	brown									Cfap36	brown									Setd1b	brown
	Cct7	brown									Wdr17	brown									Sez6l	brown
	Smyd5	brown									Ica1l	brown									Sgms1	brown
	Msrb1	brown									Dancr	brown									Shc3	brown
	Commd9	brown									Med17	brown									Sik2	brown
	Rps19	brown									Tex30	brown									Sik3	brown
	Pef1	brown									Zfp157	brown									Sipa1l1	brown
	1110004E09Rik	brown									Exosc1	brown									Ski	brown
	Bola3	brown									Usp7	brown									Slc16a14	brown
	Sec31a	brown									Tac1	brown									Slc20a1	brown
	1700021F05Rik	brown									Gpatch3	brown									Slc24a4	brown
	Tmem106c	brown									Ints6l	brown									Slc25a23	brown
	Cops8	brown									Atad5	brown									Slc25a3	brown
	Fance	brown									Fra10ac1	brown									Slc25a30	brown
	Angptl6	brown									Etnk1	brown									Slc35f3	brown
	Rps15a	brown									Ccdc173	brown									Slc41a1	brown
	Dtd1	brown									Tmem14a	brown									Slc6a1	brown
	Trappc3	brown									Sdhaf4	brown									Slc6a17	brown
	Ngrn	brown									Isca2	brown									Slc8a1	brown
	Prkx	brown									Dcaf13	brown									Slc9a7	brown
	Sstr1	brown									Gm527	brown									Slitrk1	brown
	Eif6	brown									Cxadr	brown									Slitrk3	brown
	Lage3	brown									Gm19744	brown									Smap1	brown
	Cfdp1	brown									Ift57	brown									Smarcal1	brown
	Rdh10	brown									Xpa	brown									Snph	brown
	Gss	brown									Lyrm1	brown									Snrk	brown
	Rnf181	brown									Gm24993	brown									Sntb1	brown
	Tmed1	brown									Tstd3	brown									Sntg1	brown
	Nfix	brown									Pcdh15	brown									Snx29	brown
	Fkbpl	brown									Bmp2k	brown									Sobp	brown
	Fbll1	brown									Trmt10b	brown									Socs7	brown
	Mrps36	brown									Tomm22	brown									Soga1	brown
	Apopt1	brown									Gm9962	brown									Soga3	brown
	Smim11	brown									Scyl3	brown									Sorbs1	brown
	Ssbp1	brown									Dtwd2	brown									Sorcs2	brown
	Trappc4	brown									A330048O09Rik	brown									Sorl1	brown
	Rps26	brown									Sarnp	brown									Sort1	brown
	Wdr53	brown									Zfp318	brown									Sox4	brown
	B9d1	brown									Sh2d3c	brown									Sox6	brown
	Nudt2	brown									Rbm15	brown									Specc1	brown
	Psmb1	brown									Sap18	brown									Sptb	brown
	Zbtb21	brown									Csmd3	brown									Srebf2	brown
	Maea	brown									Gm29216	brown									Srpr	brown
	Pdcl3	brown									Pgd	brown									Srsf6	brown
	Grb2	brown									Pms1	brown									Ssh2	brown
	H2afv	brown									Bmyc	brown									Sstr1	brown
	Mvb12a	brown									Pstk	brown									Sstr4	brown
	Elp5	brown									Kdm6a	brown									Stk24	brown
	Zfas1	brown									Cycs	brown									Ston2	brown
	Ftsj3	brown									Ppwd1	brown									Stox2	brown
	Psmc1	brown									Nop2	brown									Stum	brown
	Pycrl	brown									Xrn2	brown									Stxbp5l	brown
	Mrpl46	brown									Myo1d	brown									Supt16	brown
	Chrac1	brown									Hyls1	brown									Supt6	brown
	Tenm2	brown									Rpl9-ps6	brown									Susd6	brown
	Parm1	brown									Nin	brown									Sv2c	brown
	Nat9	brown									Zfhx4	brown									Syt10	brown
	Jagn1	brown									Gm28437	brown									Syt17	brown
	Sgf29	brown									Irf2bp2	brown									Tada2a	brown
	Wdr54	brown									Pigc	brown									Tbc1d13	brown
	1110012L19Rik	brown									Fastkd2	brown									Tbc1d16	brown
	Nfia	brown									Zfhx3	brown									Tbc1d24	brown
	Dcp1a	brown									Abraxas1	brown									Tbc1d30	brown
	Lyrm4	brown									Sp3os	brown									Tbc1d8b	brown
	Rrp36	brown									Zfp316	brown									Tbc1d9	brown
	Psenen	brown									Mrps30	brown									Tbck	brown
	Rnaseh2a	brown									Zfp354a	brown									Tbl1x	brown
	Cln8	brown									Tfrc	brown									Tcf20	brown
	Dda1	brown									Nnt	brown									Tecpr2	brown
	Cdk8	brown									Cbr4	brown									Tenm1	brown
	Zswim7	brown									Taf12	brown									Tenm3	brown
	Tcta	brown									Fancb	brown									Tex2	brown
	Cyfip2	cyan									Smg6	brown									Thap2	brown
	Atf6	cyan									Zfp689	brown									Thrap3	brown
	Plxna2	cyan									Gng11	brown									Thsd4	brown
	Abhd2	cyan									Pex12	brown									Thsd7a	brown
	Ubxn2b	cyan									Prmt2	brown									Timp3	brown
	Arel1	cyan									Lekr1	brown									Tll2	brown
	Ptprj	cyan									1600020E01Rik	brown									Tln2	brown
	Map2k1	cyan									Gpx8	brown									Tm9sf4	brown
	Klf9	cyan									C230004F18Rik	brown									Tmem132d	brown
	Pum1	cyan									Snhg5	brown									Tmem147	brown
	Smpd3	cyan									Yeats4	brown									Tmem164	brown
	Eno3	cyan									Polr1a	brown									Tmem178b	brown
	Ube2g1	cyan									Sat1	brown									Tmem196	brown
	Tcea2	cyan									Itpkc	brown									Tmod1	brown
	Cacnb4	cyan									Hap1	brown									Tmtc2	brown
	Tbc1d14	cyan									Nucb2	brown									Tnks	brown
	Fam102b	cyan									Gm10076	brown									Tnpo2	brown
	Vldlr	cyan									Pcdhb12	brown									Tnrc6b	brown
	Lrrtm3	cyan									Grik4	brown									Tom1	brown
	Ap2b1	cyan									Galnt7	brown									Tom1l2	brown
	Slitrk4	cyan									Nrep	brown									Tra2a	brown
	Pde1a	cyan									Nisch	cyan									Trappc10	brown
	Rhot1	cyan									Supt5	cyan									Trpc5	brown
	Gng7	cyan									Golga2	cyan									Tsr3	brown
	Dpy19l3	cyan									Usp19	cyan									Ttc17	brown
	Tnrc6a	cyan									Abcg4	cyan									U2af1	brown
	Cntrl	cyan									Llgl1	cyan									Ube4b	brown
	Kcna1	cyan									Ube2o	cyan									Ubtd2	brown
	Kcnj2	cyan									Ptprs	cyan									Uprt	brown
	Sowaha	cyan									Abca2	cyan									Usp12	brown
	Adcy5	cyan									Caskin1	cyan									Usp28	brown
	Akap5	cyan									Cant1	cyan									Usp29	brown
	Ppp1r7	cyan									Cluh	cyan									Usp9x	brown
	Uhrf1bp1l	cyan									Mast2	cyan									Utp14a	brown
	Ddn	cyan									Hcn3	cyan									Vash1	brown
	Cfap69	cyan									Sart3	cyan									Vkorc1l1	brown
	Camk4	cyan									Polg	cyan									Vps13c	brown
	Cacna2d1	cyan									Dolpp1	cyan									Vps13d	brown
	Shtn1	cyan									Jag2	cyan									Vti1a	brown
	Spop	cyan									Mroh1	cyan									Wasf3	brown
	Slitrk2	cyan									Dtx2	cyan									Wbscr17	brown
	Cers4	cyan									Abl1	cyan									Wdcp	brown
	Trpc1	cyan									Kcnc3	cyan									Wdfy3	brown
	Actr3b	cyan									Map3k12	cyan									Wdr48	brown
	Setdb1	cyan									Flii	cyan									Wdr6	brown
	Zfp57	cyan									Lrp3	cyan									Wee1	brown
	Foxo3	cyan									Adgrl1	cyan									Xkr4	brown
	Nhsl2	cyan									Capn15	cyan									Xpnpep3	brown
	Paqr9	cyan									Sh3gl3	cyan									Xpo4	brown
	Epha4	cyan									Lmnb2	cyan									Xpo5	brown
	Npr2	cyan									Dagla	cyan									Xxylt1	brown
	Tacc1	cyan									Dhx37	cyan									Xylt1	brown
	Mkl2	cyan									Pip5k1c	cyan									Zbtb14	brown
	Gas7	cyan									Numa1	cyan									Zbtb16	brown
	Ralgapb	cyan									Pkn1	cyan									Zc3h4	brown
	Mfap3l	cyan									Hid1	cyan									Zc3h7b	brown
	Slk	cyan									R3hdm2	cyan									Zcchc6	brown
	Ank	cyan									Rnf123	cyan									Zdhhc22	brown
	Dlk2	cyan									Eml3	cyan									Zdhhc5	brown
	Gpr137c	cyan									D430042O09Rik	cyan									Zfand2b	brown
	Ppp1r2	cyan									Arhgap39	cyan									Zfp109	brown
	Caprin2	cyan									Chd5	cyan									Zfp251	brown
	Cpeb1	cyan									Radil	cyan									Zfp280b	brown
	Man1a2	cyan									Arsa	cyan									Zfp398	brown
	2610507B11Rik	cyan									Camsap3	cyan									Zfp407	brown
	Prmt2	cyan									Adam11	cyan									Zfp458	brown
	Lrrc7	cyan									Fam98c	cyan									Zfp462	brown
	Cacna2d3	cyan									Obsl1	cyan									Zfp507	brown
	Kcnq5	cyan									Adat3	cyan									Zfp518b	brown
	Dlg3	cyan									Ankrd11	cyan									Zfp526	brown
	Prkaa2	cyan									Tmem94	cyan									Zfp551	brown
	Acvr2a	cyan									Adar	cyan									Zfp608	brown
	Rps6ka5	cyan									Dgkq	cyan									Zfp646	brown
	Tmem29	cyan									Tecpr1	cyan									Zfp687	brown
	Pdcl	cyan									Tmem63c	cyan									Zfp704	brown
	Tubb5	cyan									Sri	cyan									Zfp804a	brown
	Ntmt1	cyan									Zswim4	cyan									Zfp827	brown
	Miat	cyan									Zfp142	cyan									Zfp871	brown
	Cap1	cyan									Kcnq2	cyan									Zfp932	brown
	Nrbp2	cyan									Gramd4	cyan									Zfp950	brown
	Peak1	cyan									Kif21b	cyan									Zfp955b	brown
	Rbm34	cyan									Phf12	cyan									Zhx3	brown
	Ola1	cyan									Xpo6	cyan									Zkscan16	brown
	Lmo7	cyan									Mink1	cyan									Zkscan6	brown
	Tmem132b	cyan									Dok7	cyan									Zmiz1	brown
	Gnal	cyan									Rapgefl1	cyan									Znrf3	brown
	Abhd17c	cyan									Rasal1	cyan									Zscan25	brown
	Kctd12	cyan									Tmem201	cyan									1600002K03Rik	cyan
	Rbms3	cyan									Rab43	cyan									4930581F22Rik	cyan
	Tbl1xr1	cyan									Syngap1	cyan									9130011E15Rik	cyan
	Cap2	cyan									Ptcd3	cyan									Aco2	cyan
	Cplx2	cyan									Zgpat	cyan									Add1	cyan
	Fxyd7	cyan									Dclk2	cyan									Adgrg1	cyan
	Arrdc1	cyan									Ntrk3	cyan									Afg3l2	cyan
	Smad3	cyan									Rab11fip3	cyan									Ak5	cyan
	Elmo1	cyan									Slc25a42	cyan									Akap8	cyan
	Cdc40	cyan									Mfsd10	cyan									Aldh4a1	cyan
	Prkce	cyan									Tubgcp6	cyan									Amer3	cyan
	Olfm2	cyan									Pwp2	cyan									Ankrd10	cyan
	Pik3c3	cyan									Ubap2	cyan									Ap1b1	cyan
	Myo5b	cyan									Cdh24	cyan									Ap3s2	cyan
	Nras	cyan									Dnmbp	cyan									Arhgap1	cyan
	Rgs4	cyan									Zc3h18	cyan									Armcx2	cyan
	Nup155	cyan									Rubcn	cyan									Atf6	cyan
	Ptpre	cyan									Chd4	cyan									Atrnl1	cyan
	Bin1	cyan									Notch3	cyan									Bod1l	cyan
	Frs3	cyan									Mnt	cyan									Btrc	cyan
	Man2a1	cyan									Fmnl1	cyan									Cbfa2t2	cyan
	Plxna3	cyan									Tnks1bp1	cyan									Ccnl2	cyan
	Mapk10	cyan									Spen	cyan									Ccsap	cyan
	Dgki	cyan									Jdp2	cyan									Cep68	cyan
	Bzw2	cyan									Znfx1	cyan									Chka	cyan
	Calcrl	cyan									Ptpn1	cyan									Chrnb2	cyan
	Kctd1	cyan									Fchsd1	cyan									Chst15	cyan
	Tmcc1	cyan									Shank1	cyan									Cspp1	cyan
	G6pc3	cyan									Rpp38	cyan									Cyb561a3	cyan
	Shisa9	cyan									Dpf1	cyan									D430019H16Rik	cyan
	Ppm1m	cyan									Slx4	cyan									Dgkb	cyan
	Phactr3	cyan									Gcn1l1	cyan									Dzip1	cyan
	Arl4a	cyan									Chpf2	cyan									Eif2ak1	cyan
	Jph1	cyan									Myo18a	cyan									Elk1	cyan
	Cul7	cyan									Sdhd	cyan									Enc1	cyan
	Wasf1	cyan									Furin	cyan									Eogt	cyan
	Lmna	cyan									Zcchc14	cyan									Erlin2	cyan
	5330417C22Rik	cyan									Tldc1	cyan									Exoc6b	cyan
	Tubb4b	cyan									Wdr75	cyan									Exog	cyan
	Pno1	cyan									Rgp1	cyan									Faf2	cyan
	Lzts1	cyan									Tfe3	cyan									Fam207a	cyan
	Mbd5	cyan									Pum3	cyan									Fam227a	cyan
	Ccsap	cyan									Ilf2	cyan									Fbxo21	cyan
	Ric8b	cyan									Kremen1	cyan									Fem1a	cyan
	Gdap1l1	cyan									Fgfr1	cyan									Galnt16	cyan
	Mycbp2	cyan									Adcy6	cyan									Gna11	cyan
	Ubl3	cyan									Dvl3	cyan									Gnb5	cyan
	Mei4	cyan									H3f3b	cyan									Gosr1	cyan
	Tmem141	cyan									Bahcc1	cyan									Gpr107	cyan
	Rcan1	cyan									Alk	cyan									Gria1	cyan
	Zbtb1	cyan									Fancl	cyan									Grm7	cyan
	Vps37d	cyan									Cyb561d1	cyan									Hars2	cyan
	Erlin1	cyan									Mageh1	cyan									Hira	cyan
	Pdgfa	cyan									Prdm11	cyan									Hnrnph3	cyan
	Dopey1	cyan									Tcof1	cyan									Hspa12a	cyan
	Stxbp6	cyan									Osbpl5	cyan									Icmt	cyan
	Polh	cyan									Pdzd11	cyan									Ifngr2	cyan
	Nemp2	cyan									Brsk2	cyan									Il18bp	cyan
	St6gal2	cyan									Vta1	cyan									Jazf1	cyan
	Arpc2	cyan									Spin2c	cyan									Kat5	cyan
	Mapk15	cyan									Dscaml1	cyan									Katna1	cyan
	Pkdcc	cyan									Sephs1	cyan									Kbtbd4	cyan
	Mcur1	cyan									Tmem198b	cyan									Kcnd3	cyan
	Fam98b	cyan									Rbmxl1	cyan									Kdelr1	cyan
	Arhgef3	cyan									Tmem17	cyan									Kidins220	cyan
	Slc25a5	cyan									Mast1	cyan									L3mbtl2	cyan
	Oxtr	cyan									Mmadhc	cyan									Large1	cyan
	Inafm1	cyan									Stk40	cyan									Lman2	cyan
	Sema5a	cyan									Phtf1	cyan									Lrrc20	cyan
	Tpgs2	cyan									Tmem70	cyan									Lrrfip1	cyan
	Vhl	cyan									Ift20	cyan									Luc7l2	cyan
	Gpr155	cyan									Fam214b	cyan									Lypd6	cyan
	Pdzd2	cyan									Pdcd6	cyan									M5C1000I18Rik	cyan
	Plce1	cyan									Chn1	cyan									Mapk1ip1	cyan
	Fam126a	cyan									Hif1an	cyan									Mbd5	cyan
	Mtfr1l	cyan									Tgfbrap1	cyan									Mbtd1	cyan
	Atp9a	cyan									Ank1	cyan									Mfn1	cyan
	Csf1	cyan									Ccdc157	cyan									Mgat3	cyan
	Jakmip1	cyan									Itga3	cyan									Mlst8	cyan
	Sec24b	cyan									Mpg	cyan									Mon1b	cyan
	Ppp4r4	cyan									Sh3pxd2a	cyan									Mras	cyan
	Smim7	cyan									Apip	cyan									Mtmr3	cyan
	Scn3b	cyan									Ndufaf2	cyan									Mvb12b	cyan
	Sh2b2	cyan									Gm10699	cyan									Ndrg4	cyan
	Wipf3	cyan									Mterf4	cyan									Neurod6	cyan
	Gm4793	cyan									Bcorl1	cyan									Nicn1	cyan
	Slc6a1	cyan									Snca	cyan									Nmt1	cyan
	Cdo1	cyan									Cfap20	cyan									Nol11	cyan
	Srgap2	cyan									Larp1	cyan									Nsg1	cyan
	Enpp5	cyan									Nprl3	cyan									Osbpl2	cyan
	Grik1	cyan									Ece2	cyan									Paqr8	cyan
	Acap2	cyan									Selenos	cyan									Pcyt1b	cyan
	Plekha6	cyan									Sbds	cyan									Pgam1	cyan
	Dazl	cyan									Ssh1	cyan									Pgam5	cyan
	Zfp827	cyan									Susd4	cyan									Plxna2	cyan
	Mcm4	cyan									Mical3	darkred									Pmpca	cyan
	1700001L19Rik	cyan									Meg3	darkred									Ppp1r26	cyan
	Tsc22d1	cyan									Myo1a	darkred									Prkcz	cyan
	Enox1	cyan									Ap4m1	darkred									Ptcd1	cyan
	Acat2	cyan									Cacna1d	darkred									Rab15	cyan
	Gabra5	cyan									Ppip5k1	darkred									Rab5c	cyan
	Clic6	cyan									Rrp1b	darkred									Rbm6	cyan
	Tbc1d20	cyan									Dnah17	darkred									Rhbdl3	cyan
	Ncan	cyan									Tcp1	darkred									Rhof	cyan
	Dcaf17	cyan									Mybl2	darkred									Ric3	cyan
	Hcn3	cyan									Acrbp	darkred									Rnf180	cyan
	Adam23	cyan									Vegfa	darkred									Rpia	cyan
	Nectin1	cyan									Csmd2	darkred									Rps6kc1	cyan
	Prkd1	cyan									Ice1	darkred									Rptor	cyan
	Bcan	cyan									Ryr1	darkred									Scamp5	cyan
	Sema6c	cyan									Cables2	darkred									Setbp1	cyan
	Strip1	cyan									Cdan1	darkred									Sh3bgrl2	cyan
	Zfp3	cyan									Foxred1	darkred									Slc25a44	cyan
	Ntsr2	cyan									Akap13	darkred									Slc36a1	cyan
	Hes6	cyan									Trim39	darkred									Slc39a9	cyan
	Bach2	cyan									Abcc5	darkred									Slc7a6	cyan
	Rxfp3	cyan									Stx16	darkred									Slf2	cyan
	Ndufs7	green									Gm15122	darkred									Smpd3	cyan
	Cope	green									Smc1a	darkred									Snhg11	cyan
	Aup1	green									Cfap74	darkred									Snora34	cyan
	Polr2f	green									Zfp446	darkred									Spon1	cyan
	Heca	green									Zcchc8	darkred									Sprn	cyan
	Rab3a	green									Nfrkb	darkred									Spryd3	cyan
	C77370	green									Plrg1	darkred									Srek1	cyan
	Cuedc2	green									Hsd17b4	darkred									Srp68	cyan
	Dpm2	green									Stat2	darkred									Srsf11	cyan
	Akap8l	green									Mlxipl	darkred									Srsf9	cyan
	Ilkap	green									Glb1l	darkred									Stk38	cyan
	Csnk2b	green									Nav2	darkred									Tada1	cyan
	Atp5g3	green									Rbbp4	darkred									Tada2b	cyan
	Kif1b	green									Irak1	darkred									Tbc1d14	cyan
	Pfdn6	green									Bicral	darkred									Thtpa	cyan
	Atp5e	green									Ubp1	darkred									Tnrc6a	cyan
	Spag9	green									Asns	darkred									Trim35	cyan
	Cntn1	green									Morc2a	darkred									Ttll4	cyan
	Snhg20	green									Mlxip	darkred									Ubap1	cyan
	Psmb4	green									Stard9	darkred									Uvrag	cyan
	Pebp1	green									Ciao1	darkred									Wsb2	cyan
	Zdhhc1	green									Gm37859	darkred									Xpo7	cyan
	Chkb	green									Syne4	darkred									Yipf2	cyan
	Ptov1	green									Usp48	darkred									Zdhhc3	cyan
	Fbxl6	green									Nfkbid	darkred									Zdhhc6	cyan
	Lamtor2	green									Ascc2	darkred									Zfp422-ps	cyan
	Stx5a	green									Ralgps1	darkred									Zkscan3	cyan
	Ap2s1	green									Prox2	darkred									Zscan26	cyan
	Dennd6b	green									Tm6sf2	darkred									43162	green
	Erp29	green									Atp6v1e1	darkred									43163	green
	Tbcb	green									Cercam	darkred									43165	green
	Map2k2	green									Smu1	darkred									1700008O03Rik	green
	Gnb2	green									4930556I23Rik	darkred									1700025G04Rik	green
	Ndufa8	green									Xndc1	darkred									1700030J22Rik	green
	Fam69b	green									Slc4a1ap	darkred									1700086L19Rik	green
	Hcfc1r1	green									Clcn1	darkred									1810041L15Rik	green
	Wdr7	green									Atp11a	darkred									4930539E08Rik	green
	Acot7	green									Pfas	darkred									8030462N17Rik	green
	Zfp821	green									Numb	darkred									9330182L06Rik	green
	Sharpin	green									Kmt2a	darkred									9530052E02Rik	green
	Frs2	green									Rab31	darkred									A230056P14Rik	green
	Atp6v1a	green									Atcayos	darkred									A430033K04Rik	green
	P4htm	green									Mfsd2b	darkred									A730011C13Rik	green
	2210016L21Rik	green									Dnase1l2	darkred									Abat	green
	Eri3	green									Chd8	darkred									Abcg1	green
	Arl2	green									Hdhd2	darkred									Abhd2	green
[truncated: 4,753 more rows]

## Sheet: Table 3 - DE
Supplemental Table 3 - Genes coded in yellow are DE in each brain region (FDR < 0.05). Note FDR = 0, < 0.0001.
This is the only table that shows the DE, DV and DW data for all genes in all three brain regions
The lists of the overlapping genes are found at the far right of this table.
CeA	Symbol	Module	p.val.DE	FDR - DE	logFC		p.val.DV	FDR - DV	varRatio	modular conn Consensus	modular conn Low	modular conn High		p.val.DW	FDR - DW	changed edge count			SH	Symbol	Module	p.val.DE	FDR - DE	logFC		p.val.DV	FDR - DV	varRatio	modular conn Consensus	modular conn Low	modular conn High		p.val.DW	FDR - DW	changed edge count			PL	Symbol	Module	p.val.DE	FDR - DE	logFC		p.val.DV	FDR - DV	varRatio	modular conn Consensus	modular conn Low
	Stbd1	lightyellow	0.002	0.003	-0.588		0	0	0.249	0.099	0.308	0.005		0.76	1	43				Rfk	brown	0	0	0.152		0.334	1	0.718	0.292	0.442	0.465		1	1	6				Pced1a	greenyellow	0.006	0.012	-0.149		0.893	1	0.947	0.047	0.196
	Otud4	tan	0.015	0.034	0.116		0.193	1	0.629	0.045	0.155	0.008		0.844	1	41				Gdi2	blue	0	0	0.139		0.287	1	0.694	0.45	0.558	0.528		1	1	9				Pou6f1	turquoise	0.005	0.01	-0.156		0.087	1	0.499	0.108	0.232
	Washc4	blue	0.011	0.022	0.163		0.002	0.004	2.996	0.007	0.002	0.011		1	1	20				5730455P16Rik	green	0	0	0.213		0.461	1	0.777	0.535	0.549	0.706		0	0	160				G630016G05Rik	turquoise	0.01	0.022	-0.311		0.028	1	0.407	0.165	0.319
	Ndufa12	blue	0.003	0.005	-0.124		0.39	1	1.355	0.02	0.049	0.012		1	1	2				Tnfrsf19	blue	0	0	0.165		0.625	1	0.846	0.357	0.697	0.277		0	0	660				Rasip1	turquoise	0.017	0.044	-0.189		0.105	1	0.518	0.152	0.298
	Atf1	yellow	0	0	0.207		0.193	1	1.586	0.039	0.066	0.012		1	1	14				Sec23ip	blue	0	0	0.166		0.868	1	1.059	0.306	0.463	0.34		0.988	1	81				Lgals4	blue	0.011	0.026	-0.402		0.81	1	0.907	0.155	0.481
	Neu2	black	0	0.001	-0.36		0.029	0.11	0.456	0.239	0.62	0.014		0	0	103				Ift81	blue	0	0	0.176		0.853	1	0.939	0.213	0.272	0.307		1	1	20				Pqlc2	blue	0.001	0.002	-0.193		0.106	1	0.519	0.129	0.336
	Syt2	greenyellow	0	0	-0.476		0	0	0.23	0.025	0.058	0.015		1	1	17				Cep290	turquoise	0	0	0.261		0.23	1	1.513	0.196	0.616	0.149		0.862	1	92				Alpk3	black	0.013	0.032	-0.543		0.358	1	0.691	0.119	0.176
	Tspyl3	black	0.013	0.028	0.099		0.403	1	1.344	0.03	0.079	0.019		1	1	16				Zfp367	turquoise	0	0	0.247		0.625	1	0.846	0.203	0.498	0.127		1	1	67				Xrcc3	turquoise	0.009	0.022	-0.215		0.069	1	0.478	0.236	0.402
	Gm10118	yellow	0.004	0.006	0.242		0.903	1	0.957	0.018	0.015	0.021		1	1	15				Wdr37	blue	0	0	0.166		0.033	0.091	0.478	0.204	0.225	0.335		1	1	34				Epha8	turquoise	0	0	-0.489		0.009	0.024	0.339	0.157	0.221
	Copa	blue	0.002	0.003	0.082		0.364	1	0.724	0.037	0.122	0.021		1	1	4				Pou6f1	yellow	0	0	-0.185		0.043	0.164	0.497	0.441	0.746	0.272		1	1	29				Sox17	black	0.006	0.012	-0.223		0.342	1	0.682	0.198	0.359
	Nrsn2	turquoise	0.007	0.015	-0.135		0.957	1	1.019	0.018	0.026	0.022		1	1	5				Glod4	midnightblue	0	0	0.265		0.09	1	0.558	0.17	0.221	0.448		0	0	236				Phf23	turquoise	0.015	0.037	-0.14		0.06	1	0.466	0.137	0.176
	St3gal4	midnightblue	0.014	0.032	-0.102		0.52	1	0.796	0.133	0.352	0.023		1	1	15				Mal2	turquoise	0	0	-0.25		0.024	0.065	0.459	0.199	0.429	0.208		1	1	19				Pus7	turquoise	0.001	0.001	-0.212		0.01	0.026	0.345	0.208	0.353
	Slc10a4	black	0.003	0.005	-0.368		0.014	0.032	0.414	0.071	0.106	0.024		1	1	8				Etnk1	brown	0	0	-0.133		0.036	0.102	0.483	0.239	0.566	0.076		0	0	389				Tas1r3	turquoise	0.012	0.029	-0.317		0.94	1	1.03	0.124	0.161
	Slc6a11	black	0.002	0.003	0.168		0.903	1	0.957	0.051	0.171	0.025		0.004	1	67				Dgke	pink	0	0	0.14		0.488	1	1.27	0.146	0.358	0.09		1	1	66				Mettl13	turquoise	0.014	0.033	-0.103		0.884	1	0.942	0.159	0.245
	Bri3bp	black	0.016	0.041	0.07		0.959	1	1.018	0.052	0.091	0.027		1	1	17				Ube2f	pink	0	0	0.113		0.351	1	0.726	0.121	0.207	0.117		1	1	47				Glod4	blue	0	0	0.274		0.237	1	0.621	0.113	0.296
	Gm10654	green	0.003	0.005	-0.704		0.178	1	0.619	0.056	0.191	0.027		1	1	7				Ndufaf7	turquoise	0	0	-0.15		0.393	1	0.746	0.083	0.31	0.048		0	0	250				Shroom1	turquoise	0.001	0.002	-0.319		0.067	1	0.475	0.127	0.174
	Cox5a	turquoise	0.003	0.006	-0.135		0.406	1	0.744	0.019	0.027	0.029		1	1	4				Scrn3	turquoise	0	0	0.221		0.075	1	0.541	0.114	0.108	0.333		1	1	24				Ddx27	turquoise	0.011	0.025	-0.129		0.117	1	0.53	0.223	0.351
	Tmem191c	tan	0.003	0.006	-0.311		0.659	1	0.855	0.085	0.139	0.029		1	1	9				Fkbp2	salmon	0	0	-0.194		0.697	1	1.144	0.251	0.327	0.341		1	1	0				Kcnq1ot1	turquoise	0.014	0.033	-0.271		0.134	1	0.546	0.119	0.128
	Csrp2	midnightblue	0	0.001	-0.345		0.001	0.002	0.297	0.254	0.671	0.029		0.009	1	65				Unc5d	lightgreen	0	0	0.321		0.119	1	1.715	0.469	0.642	0.311		1	1	33				5730409E04Rik	red	0.013	0.031	0.135		0.781	1	1.116	0.178	0.402
	Ate1	black	0.016	0.039	0.079		0.216	1	1.549	0.027	0.036	0.031		0	0	123				Peli1	blue	0	0	0.19		0.592	1	0.833	0.1	0.194	0.081		1	1	36				Psat1	turquoise	0.004	0.009	0.146		0.3	1	1.514	0.101	0.146
	Smim10l1	turquoise	0.005	0.008	-0.22		0.978	1	0.99	0.032	0.127	0.032		1	1	14				Mar1	lightgreen	0	0	0.375		0.001	0.002	3.265	0.527	0.624	0.45		1	1	14				Gm21781	turquoise	0.009	0.021	-0.276		0.508	1	0.766	0.164	0.222
	Tmem59l	turquoise	0.001	0.002	-0.181		0.461	1	0.77	0.045	0.119	0.033		1	1	15				Arl14ep	turquoise	0	0.001	-0.144		0.009	0.019	0.403	0.48	0.652	0.548		1	1	11				Dhrs11	black	0.011	0.023	-0.233		0.018	0.067	2.604	0.078	0.063
	Krt1	yellow	0	0	-0.314		0.167	1	0.611	0.073	0.062	0.035		1	1	11				Aph1b	turquoise	0.001	0.001	0.158		0.053	1	0.512	0.373	0.485	0.404		1	1	1				Hpn	turquoise	0.014	0.033	-0.589		0.003	0.007	0.296	0.135	0.164
	Snord91a	tan	0	0	0.366		0.042	1	0.483	0.074	0.107	0.037		1	1	7				Cpd	blue	0.001	0.001	0.168		0.179	1	0.63	0.349	0.396	0.466		0	0	155				Gm15328	black	0.007	0.016	-0.376		0.156	1	0.563	0.123	0.139
	Sccpdh	midnightblue	0	0.001	-0.254		0.005	0.009	0.363	0.075	0.082	0.038		1	1	1				Mapre1	blue	0.001	0.001	0.11		0.545	1	0.813	0.238	0.443	0.136		0	0	272				Gm14169	turquoise	0.011	0.026	-0.193		0.116	1	0.529	0.104	0.102
	Akr7a5	brown	0.008	0.016	-0.193		0.926	1	1.033	0.008	0.003	0.039		1	1	14				Wdr75	cyan	0	0.001	-0.139		0.004	0.007	0.362	0.296	0.619	0.168		0	0	963				Sh3bp2	turquoise	0.013	0.031	-0.215		0.55	1	0.786	0.128	0.134
	Aldh1a1	black	0	0	-0.467		0.007	0.013	0.374	0.114	0.186	0.039		1	1	14				Zbtb26	blue	0.001	0.001	0.217		0.135	1	1.677	0.223	0.372	0.226		1	1	21				Eef2k	turquoise	0.001	0.001	-0.158		0.739	1	0.874	0.14	0.171
	Tenm2	brown	0.009	0.019	0.16		0.39	1	1.355	0.02	0.018	0.04		1	1	2				Mfsd6	lightgreen	0	0.001	0.146		0.122	1	1.707	0.639	0.595	0.565		1	1	34				Kif26a	turquoise	0.018	0.048	-0.267		0.033	1	0.42	0.286	0.442
	Thy1	turquoise	0.001	0.002	-0.131		0.286	1	0.684	0.039	0.087	0.04		1	1	20				Tsr1	midnightblue	0.001	0.001	0.185		0.791	1	1.096	0.52	0.521	0.673		0	0	283				Rgl3	turquoise	0.005	0.01	-0.438		0.01	0.028	0.348	0.279	0.433
	BC030499	tan	0	0	-0.501		0.872	1	1.058	0.095	0.195	0.04		1	1	8				Rpl23a	turquoise	0	0.001	-0.192		0.006	0.012	0.388	0.176	0.476	0.051		0	0	319				Fmnl3	turquoise	0.009	0.021	-0.208		0.019	0.073	0.383	0.278	0.405
	Fam210b	green	0.001	0.002	-0.196		0.131	1	1.708	0.024	0.115	0.041		1	1	1				Gtpbp4	blue	0	0.001	0.147		0.045	0.173	0.501	0.135	0.251	0.081		1	1	22				Gm27032	turquoise	0.005	0.011	-0.223		0.379	1	0.702	0.264	0.428
	Plekha5	tan	0.006	0.011	-0.14		0.196	1	0.631	0.086	0.115	0.042		1	1	7				Ppm1e	blue	0.001	0.001	0.202		0.614	1	1.19	0.155	0.145	0.228		1	1	0				Arhgap17	turquoise	0.014	0.033	-0.193		0.127	1	0.54	0.216	0.281
	Klhl5	blue	0.001	0.001	0.131		0.802	1	1.092	0.077	0.24	0.043		1	1	2				Luzp2	magenta	0.001	0.001	0.593		0	0	17.432	0.818	0.51	0.848		1	1	52				Ap4m1	turquoise	0.001	0.003	-0.242		0.476	1	0.75	0.161	0.191
	Ppil3	blue	0.003	0.005	-0.143		0.96	1	0.982	0.036	0.032	0.046		1	1	2				Ypel2	turquoise	0	0.001	-0.149		0.089	1	0.557	0.144	0.204	0.193		0	0	219				Utp4	black	0.008	0.019	0.076		0.399	1	1.4	0.17	0.201
	Vezt	black	0.003	0.004	0.089		0.002	0.004	3.07	0.021	0.008	0.047		1	1	9				Dstyk	magenta	0	0.001	0.173		0	0	4.142	0.564	0.283	0.669		0.001	1	137				Pygo1	brown	0.009	0.02	0.136		0.012	0.035	2.774	0.184	0.555
	Polr3b	blue	0	0	0.244		0	0	6.791	0.046	0.034	0.047		1	1	5				Zzef1	pink	0.001	0.001	-0.163		0.017	0.04	0.437	0.171	0.149	0.324		1	1	1				Sox12	turquoise	0.001	0.003	-0.192		0.132	1	0.543	0.353	0.582
	Capn1	black	0.017	0.044	-0.156		0.195	1	1.583	0.057	0.069	0.049		1	1	7				Rfxank	pink	0.001	0.001	-0.185		0.349	1	0.725	0.195	0.268	0.171		1	1	9				Astn2	blue	0.005	0.011	0.188		0.2	1	1.671	0.128	0.091
	Ddc	black	0.008	0.017	0.185		0.856	1	1.065	0.048	0.044	0.05		1	1	4				Heatr5b	magenta	0	0.001	0.173		0	0	3.856	0.57	0.319	0.673		0	0	188				Grin2d	turquoise	0.003	0.007	-0.292		0.001	0.003	0.264	0.353	0.546
	Txnrd2	tan	0.013	0.029	-0.149		0.722	1	0.881	0.103	0.137	0.05		1	1	3				Nnt	brown	0.001	0.001	-0.138		0.002	0.004	0.339	0.133	0.19	0.127		1	1	3				Ptrh2	red	0	0	0.25		0.459	1	1.344	0.132	0.256
	Alad	yellow	0	0	-0.367		0.008	0.016	0.382	0.196	0.274	0.051		1	1	13				1600020E01Rik	brown	0	0.001	-0.222		0.012	0.026	0.416	0.142	0.151	0.266		1	1	18				Otud5	turquoise	0.01	0.022	-0.079		0.2	1	0.596	0.15	0.139
	Slc16a3	tan	0.002	0.003	-0.328		0.591	1	0.826	0.105	0.127	0.053		1	1	6				Hmcn2	pink	0.001	0.001	-0.622		0.079	1	0.546	0.2	0.248	0.215		1	1	62				Cercam	turquoise	0.016	0.038	-0.304		0.01	0.026	0.345	0.382	0.571
	Slc7a2	turquoise	0.004	0.007	0.204		0.454	1	1.302	0.065	0.128	0.054		1	1	4				Fbxo28	turquoise	0.001	0.001	0.095		0.958	1	1.019	0.076	0.117	0.102		1	1	7				Zfp180	blue	0.002	0.004	0.151		0.477	1	1.328	0.168	0.178
	Vdac3	red	0.007	0.016	-0.084		0.028	0.105	2.188	0.078	0.135	0.055		1	1	4				Pts	royalblue	0.001	0.001	-0.188		0.153	1	0.612	0.127	0.245	0.085		0	0	1274				Ormdl1	black	0.007	0.013	-0.227		0.921	1	1.04	0.145	0.482
	Klhl21	blue	0.012	0.027	0.146		0.648	1	1.175	0.037	0.027	0.056		1	1	27				Actr6	turquoise	0.001	0.002	0.146		0.277	1	0.688	0.627	0.692	0.819		1	1	3				Wtip	green	0.011	0.026	-0.246		0.224	1	0.612	0.171	0.239
	Alkbh6	turquoise	0.015	0.033	-0.127		0.254	1	0.667	0.035	0.051	0.057		1	1	16				Slirp	brown	0.001	0.002	-0.215		0.015	0.036	0.43	0.624	0.678	0.773		0	0	190				Trim37	blue	0.004	0.008	0.155		0.012	0.034	2.784	0.195	0.295
	Dgke	yellow	0.007	0.016	0.101		0.057	1	1.968	0.055	0.043	0.057		1	1	22				Gfpt1	green	0.002	0.002	0.116		0.07	1	1.872	0.727	0.697	0.849		0.719	1	97				Vps36	purple	0.011	0.025	0.107		0.231	1	1.615	0.24	0.384
	Thpo	tan	0.006	0.013	-0.669		0.205	1	0.637	0.119	0.165	0.057		1	1	1				Gda	green	0.001	0.002	0.169		0.203	1	0.646	0.341	0.415	0.356		1	1	27				Tnfrsf4	blue	0.011	0.025	-0.378		0.224	1	0.612	0.162	0.205
	Tango2	tan	0.001	0.001	-0.14		0.349	1	0.717	0.158	0.293	0.058		0.711	1	44				Gclc	blue	0.001	0.002	0.106		0.871	1	0.946	0.31	0.503	0.217		1	1	21				Micall2	black	0.008	0.017	-0.301		0.871	1	0.936	0.088	0.05
	Rilpl1	greenyellow	0.003	0.006	-0.126		0.474	1	0.776	0.074	0.116	0.059		1	1	2				Washc4	turquoise	0.001	0.002	0.2		0.134	1	1.678	0.226	0.381	0.341		1	1	19				Slc25a29	turquoise	0.009	0.021	-0.214		0.239	1	0.622	0.271	0.347
	Maml2	tan	0.006	0.013	0.137		0.94	1	0.973	0.086	0.081	0.06		1	1	11				Gm43517	brown	0.001	0.002	-0.201		0.023	0.058	0.454	0.344	0.531	0.215		0	0	399				Col11a2	turquoise	0.01	0.023	-0.426		0.086	1	0.499	0.283	0.36
	Aph1b	turquoise	0.002	0.003	0.152		0.749	1	1.119	0.071	0.204	0.062		1	1	1				Atf1	turquoise	0.001	0.002	0.161		0.265	1	1.469	0.194	0.498	0.154		1	1	54				Adam1a	blue	0.014	0.033	-0.314		0.04	1	0.433	0.121	0.146
	Tmprss15	yellow	0	0	0.482		0.459	1	1.299	0.102	0.097	0.064		0.805	1	42				Adk	turquoise	0.001	0.002	0.142		0.537	1	1.237	0.142	0.274	0.152		1	1	12				Ankra2	black	0.004	0.009	-0.134		0.893	1	0.947	0.14	0.393
	Htr2a	green	0.005	0.01	0.543		0.307	1	1.435	0.071	0.083	0.065		1	1	4				Slbp	lightgreen	0.001	0.002	0.128		0.237	1	1.504	0.452	0.485	0.352		1	1	30				Prr22	turquoise	0.003	0.007	-0.562		0.047	1	0.446	0.279	0.347
	Ispd	tan	0	0	0.265		0.004	0.008	2.818	0.076	0.058	0.066		1	1	1				Hdac9	lightgreen	0.002	0.002	0.221		0.002	0.003	2.989	0.715	0.487	0.703		1	1	2				Tenm4	yellow	0.005	0.01	-0.151		0.713	1	1.157	0.157	0.143
	Gabrd	black	0.003	0.005	-0.223		0.065	1	0.517	0.146	0.242	0.066		1	1	19				Ptgr2	pink	0.001	0.002	0.167		0.103	1	0.57	0.129	0.294	0.04		0.135	1	114				Pno1	black	0.013	0.031	0.141		0.655	1	1.195	0.165	0.176
	Mlh3	tan	0	0.001	0.242		0.147	1	0.597	0.098	0.089	0.069		1	1	9				Arhgap35	magenta	0.001	0.002	0.134		0.001	0.002	3.266	0.632	0.379	0.784		0	0	431				Higd1a	red	0.013	0.032	0.12		0.098	1	1.946	0.285	0.564
	Sox13	yellow	0.004	0.007	0.258		0.098	1	1.798	0.138	0.224	0.069		1	1	7				Gabra3	lightgreen	0.001	0.002	0.145		0.23	1	0.662	0.34	0.699	0.149		1	1	6				Dpp7	purple	0.008	0.019	-0.177		0.246	1	1.59	0.155	0.109
	Map2k5	tan	0.01	0.021	-0.089		0.84	1	0.93	0.101	0.084	0.07		1	1	1				Tnfrsf21	lightyellow	0.001	0.002	0.151		0.151	1	1.643	0.206	0.138	0.354		1	1	16				Akr7a5	turquoise	0.001	0.003	-0.257		0.36	1	0.692	0.154	0.143
	Slc29a1	yellow	0.008	0.017	-0.18		0.223	1	0.648	0.309	0.587	0.07		1	1	17				Sox1	pink	0.001	0.002	0.163		0.901	1	0.959	0.142	0.237	0.106		1	1	28				Doc2b	pink	0.002	0.004	0.247		0.913	1	1.043	0.218	0.484
	Fnta	red	0.015	0.034	-0.082		0.035	0.213	2.117	0.09	0.096	0.071		1	1	1				Slc8a1	magenta	0.002	0.002	0.435		0	0	9.627	0.649	0.141	0.75		0	0	366				Htr6	magenta	0.012	0.028	-0.233		0.407	1	0.716	0.208	0.26
	Ccdc184	midnightblue	0.006	0.012	-0.156		0.005	0.01	0.364	0.229	0.422	0.071		1	1	10				Slc19a1	purple	0.001	0.002	-0.147		0.827	1	0.928	0.165	0.266	0.159		1	1	6				Rab3c	black	0.009	0.021	0.196		0.534	1	0.779	0.211	0.218
	Scn1b	black	0.015	0.033	-0.152		0.34	1	1.401	0.035	0.013	0.072		1	1	21				Pip5k1b	lightgreen	0.001	0.002	0.194		0.629	1	1.181	0.35	0.408	0.254		1	1	17				Gm2415	pink	0.011	0.025	-0.163		0.206	1	0.601	0.15	0.186
	Ext1	red	0.001	0.002	0.154		0.105	1	1.777	0.078	0.089	0.072		1	1	6				Tax1bp1	blue	0.002	0.003	0.101		0.582	1	0.828	0.743	0.837	0.756		0.031	1	122				N4bp2l1	pink	0.001	0.003	-0.187		0.141	1	0.551	0.276	0.578
	Gm37607	blue	0.004	0.007	-0.371		0.017	0.041	2.348	0.051	0.035	0.073		0	0	97				Nufip2	green	0.002	0.003	0.201		0.115	1	1.725	0.634	0.608	0.744		0	0	627				Gm37607	green	0.001	0.003	-0.464		0.739	1	1.142	0.188	0.214
	Prkg2	yellow	0.007	0.015	0.208		0.506	1	1.265	0.103	0.093	0.073		0.844	1	41				Zfp945	brown	0.002	0.003	-0.184		0.003	0.005	0.353	0.395	0.435	0.493		0.999	1	72				Ankmy2	red	0.013	0.031	0.107		0.814	1	1.097	0.341	0.717
	Sec23ip	yellow	0.001	0.002	0.124		0.21	1	1.559	0.109	0.081	0.073		1	1	11				Ispd	blue	0.002	0.003	0.209		0.618	1	1.187	0.292	0.363	0.306		0.995	1	78				Gm4793	blue	0.018	0.046	-0.339		0.962	1	0.98	0.151	0.095
	Fam129b	greenyellow	0.005	0.009	-0.173		0.935	1	1.029	0.027	0.027	0.074		0.997	1	30				Stk39	turquoise	0.002	0.003	0.136		0.789	1	0.913	0.204	0.275	0.263		1	1	26				Zfp57	turquoise	0.014	0.035	-0.268		0.907	1	1.047	0.137	0.092
	Tmem183a	turquoise	0.005	0.008	-0.073		0.685	1	0.866	0.048	0.139	0.074		1	1	9				Ccdc61	turquoise	0.002	0.003	-0.213		0.014	0.032	0.425	0.162	0.194	0.259		1	1	10				Otof	red	0.002	0.005	-0.489		0.013	0.038	0.361	0.203	0.309
	Litaf	yellow	0.002	0.003	-0.227		0.341	1	0.713	0.079	0.034	0.076		1	1	12				Mxi1	blue	0.002	0.003	0.108		0.59	1	0.832	0.209	0.61	0.056		0	0	230				Aars2	turquoise	0.011	0.026	-0.184		0.645	1	1.201	0.376	0.698
	Gde1	blue	0.001	0.002	-0.088		0.133	1	1.704	0.029	0.005	0.078		0.602	1	46				Rps6ka4	black	0.002	0.003	-0.152		0.952	1	1.022	0.25	0.438	0.185		1	1	42				Clcn4	blue	0.001	0.003	0.104		0.031	1	2.388	0.25	0.314
	1700001L19Rik	cyan	0.007	0.013	-0.172		0.986	1	1.005	0.124	0.209	0.078		1	1	4				Wdr17	brown	0.002	0.003	-0.138		0.081	1	0.548	0.26	0.453	0.126		0	0	159				Mapk9	green	0.007	0.017	0.094		0.117	1	1.878	0.243	0.309
	Chchd10	tan	0.011	0.025	-0.161		0.237	1	0.656	0.151	0.209	0.079		1	1	9				Ica1l	brown	0.002	0.003	-0.105		0.083	1	0.55	0.189	0.428	0.064		0	0	913				Repin1	turquoise	0.012	0.027	-0.144		0.693	1	0.853	0.256	0.267
	Gm37711	yellow	0.001	0.002	-0.264		0.475	1	0.776	0.177	0.234	0.079		1	1	8				Nab1	turquoise	0.002	0.003	0.182		0.315	1	1.414	0.134	0.142	0.301		1	1	9				Srek1	cyan	0.016	0.038	-0.157		0.162	1	0.569	0.345	0.537
	Rasgrp2	black	0	0	-0.443		0	0	0.159	0.246	0.378	0.079		1	1	7				Tmem57	red	0.002	0.003	-0.08		0.58	1	0.828	0.272	0.364	0.312		0	0	524				Ak2	blue	0.002	0.005	-0.135		0.636	1	1.207	0.191	0.15
	Nxph2	yellow	0.001	0.001	0.379		0.357	1	1.385	0.103	0.097	0.08		1	1	5				Pls3	blue	0.002	0.003	0.178		0.58	1	1.21	0.146	0.082	0.347		1	1	18				Ppfia4	red	0.002	0.004	-0.203		0.246	1	0.627	0.132	0.103
	Cgref1	midnightblue	0.007	0.016	-0.131		0.321	1	0.703	0.149	0.175	0.081		1	1	2				Gm29216	brown	0.002	0.003	-0.378		0.837	1	0.932	0.177	0.285	0.157		1	1	37				Myo1c	turquoise	0.001	0.003	-0.24		0.012	0.036	0.358	0.401	0.552
	Jsrp1	royalblue	0.001	0.002	-0.285		0.667	1	1.163	0.165	0.335	0.081		1	1	5				Pld3	royalblue	0.002	0.003	0.151		0.851	1	1.067	0.381	0.372	0.424		1	1	23				Zfp446	turquoise	0.007	0.016	-0.23		0.327	1	0.674	0.315	0.353
	Commd8	pink	0.016	0.039	-0.188		0.008	0.017	2.585	0.085	0.289	0.082		1	1	22				Nectin3	lightgreen	0.002	0.003	0.18		0.27	1	1.462	0.448	0.378	0.386		1	1	57				Uspl1	turquoise	0.005	0.011	-0.103		0.045	1	0.442	0.121	0.216
	Zfp760	purple	0.004	0.007	-0.23		0.84	1	0.93	0.127	0.219	0.084		1	1	2				Tspan6	black	0.002	0.003	0.179		0.535	1	1.238	0.154	0.201	0.167		0.957	1	86				5730455P16Rik	blue	0.003	0.006	0.195		0.68	1	0.847	0.229	0.28
	Fam212b	greenyellow	0	0	-0.275		0.957	1	0.981	0.067	0.092	0.085		1	1	4				N4bp2l1	red	0.002	0.003	-0.159		0.217	1	0.654	0.269	0.288	0.523		0	0	194				Gga2	magenta	0.012	0.027	-0.125		0.328	1	0.675	0.282	0.341
	Oaz2	lightcyan	0.002	0.004	0.086		0.531	1	0.801	0.092	0.17	0.085		1	1	10				Cdkl5	magenta	0.002	0.003	0.616		0	0	36.719	0.679	0.549	0.722		0	0	192				Recql4	turquoise	0.014	0.035	-0.349		0.285	1	0.65	0.222	0.203
	Tmem50b	purple	0.006	0.012	-0.078		0.063	1	1.94	0.103	0.199	0.085		1	1	6				Eya3	yellow	0.002	0.003	-0.114		0.418	1	0.758	0.139	0.353	0.043		1	1	21				Wdr37	turquoise	0.002	0.004	0.138		0.384	1	1.416	0.066	0.021
	Tmem200b	black	0.001	0.002	-0.404		0.862	1	0.94	0.173	0.261	0.085		1	1	17				Chid1	turquoise	0.002	0.003	-0.106		0.056	1	0.517	0.109	0.108	0.294		1	1	12				Cep68	cyan	0.011	0.026	-0.102		0.597	1	0.808	0.199	0.334
	D16Ertd472e	blue	0.006	0.011	0.244		0.166	1	1.635	0.078	0.07	0.089		0.805	1	42				Dnajc9	turquoise	0.002	0.003	-0.104		0.248	1	0.673	0.091	0.252	0.039		0	0	405				Commd5	red	0.018	0.046	0.149		0.357	1	1.445	0.146	0.079
	Hhip	yellow	0	0	-0.445		0.006	0.012	0.371	0.194	0.187	0.09		1	1	1				Lrrc14	tan	0.002	0.003	-0.092		0.944	1	1.025	0.335	0.536	0.323		1	1	20				Pld2	turquoise	0.003	0.007	-0.192		0.151	1	0.56	0.107	0.057
	Prkca	tan	0.014	0.032	0.129		0.75	1	1.118	0.049	0.023	0.093		1	1	9				Cav2	blue	0.003	0.004	0.254		0.879	1	0.95	0.325	0.491	0.261		0	0	230				2510009E07Rik	blue	0.012	0.027	0.113		0.896	1	1.053	0.103	0.034
	Aktip	red	0	0	-0.114		0.395	1	1.351	0.075	0.067	0.093		0.074	1	58				Gin1	brown	0.002	0.004	-0.196		0.038	0.124	0.489	0.291	0.453	0.175		0	0	680				Gm37893	turquoise	0.018	0.05	-0.482		0.019	0.081	0.384	0.365	0.428
	Cntnap5b	blue	0.006	0.012	0.342		0.115	1	1.75	0.084	0.087	0.094		0	0	94				Ptpmt1	brown	0.002	0.004	-0.113		0.047	0.212	0.504	0.295	0.37	0.283		0	0	458				Slc27a1	turquoise	0.003	0.007	-0.206		0.208	1	0.601	0.17	0.127
	Katnal1	blue	0.001	0.001	0.236		0.822	1	0.923	0.043	0.025	0.096		0	0	154				Fam169a	turquoise	0.003	0.004	-0.161		0.002	0.004	0.345	0.181	0.372	0.073		0.973	1	84				Csmd1	magenta	0.015	0.036	-0.13		0.165	1	1.745	0.144	0.097
	Upf3a	brown	0.002	0.003	-0.109		0.582	1	0.822	0.046	0.053	0.096		0	0.001	77				Skiv2l2	blue	0.003	0.004	0.103		0.291	1	1.44	0.147	0.108	0.294		1	1	5				Gm36936	turquoise	0.006	0.013	-0.515		0.254	1	0.631	0.282	0.276
	Gal	midnightblue	0.002	0.004	-0.731		0.034	0.165	0.467	0.216	0.341	0.096		1	1	7				Pde4d	magenta	0.003	0.004	0.284		0	0	3.84	0.723	0.289	0.885		0	0	176				Gtpbp4	black	0.012	0.028	0.117		0.031	1	2.4	0.156	0.076
	Tmbim4	blue	0.002	0.003	-0.117		0.696	1	1.148	0.044	0.015	0.097		0.975	1	35				Os9	grey60	0.003	0.004	-0.095		0.073	1	0.539	0.471	0.601	0.549		1	1	5				Mrpl19	black	0.008	0.019	0.095		0.283	1	0.648	0.181	0.134
	Csf1	cyan	0.009	0.02	-0.168		0.207	1	1.563	0.161	0.357	0.097		1	1	14				Csmd3	brown	0.003	0.004	-0.158		0.039	0.125	0.489	0.119	0.216	0.059		1	1	68				H2-M5	turquoise	0	0.001	-0.586		0.744	1	0.876	0.291	0.345
	Gm22771	tan	0.005	0.008	0.316		0.929	1	1.031	0.119	0.108	0.1		0.975	1	35				Dab2ip	greenyellow	0.003	0.004	0.182		0.278	1	1.453	0.3	0.483	0.286		0	0	1100				Cuedc1	turquoise	0.003	0.007	-0.249		0.012	0.036	0.358	0.297	0.324
	H2-Q2	midnightblue	0	0.001	-0.774		0.113	1	0.568	0.164	0.221	0.1		1	1	4				Arfgef3	magenta	0.003	0.004	0.342		0	0	8.586	0.646	0.197	0.713		0	0	420				Nfatc2	black	0.01	0.022	-0.229		0.302	1	0.659	0.235	0.21
	Cdh7	black	0	0	-0.301		0.017	0.042	0.425	0.149	0.196	0.103		1	1	11				Plcxd3	magenta	0.002	0.004	0.647		0	0	30.887	0.632	0.169	0.699		0.996	1	77				Gdi2	blue	0.001	0.002	0.131		0.643	1	0.83	0.272	0.388
	Psen2	turquoise	0.002	0.003	0.158		0.569	1	1.222	0.028	0.04	0.104		0.989	1	33				Fmnl2	turquoise	0.003	0.005	0.141		0.398	1	0.749	0.378	0.466	0.431		1	1	38				Acr	blue	0.014	0.034	-0.354		0.831	1	1.088	0.291	0.279
	Prrx1	turquoise	0.014	0.032	0.198		0.027	0.102	2.199	0.042	0.012	0.104		0.983	1	34				Rnft1	red	0.003	0.005	-0.157		0.022	0.057	0.453	0.391	0.53	0.438		1	1	47				Col6a2	turquoise	0.003	0.007	-0.635		0.865	1	1.07	0.182	0.125
	Scyl2	yellow	0	0	0.179		0.129	1	0.582	0.196	0.172	0.104		1	1	20				Slc12a9	pink	0.003	0.005	-0.27		0.002	0.004	0.342	0.389	0.642	0.182		1	1	58				Rasgrp4	turquoise	0.001	0.002	-0.614		0	0	0.173	0.289	0.359
	Lhx8	midnightblue	0.005	0.009	-0.265		0.746	1	0.891	0.091	0.076	0.105		1	1	0				Tmem191c	yellow	0.003	0.005	-0.303		0.768	1	0.904	0.324	0.403	0.31		1	1	9				Pced1b	turquoise	0.005	0.01	-0.214		0.192	1	0.591	0.382	0.419
	Tcea1	yellow	0.006	0.011	0.209		0.828	1	0.925	0.096	0.052	0.105		1	1	25				Rbm17	greenyellow	0.003	0.005	-0.093		0.948	1	1.023	0.453	0.561	0.517		0	0	379				Zzef1	magenta	0.003	0.006	-0.17		0.216	1	0.607	0.172	0.135
	Coasy	brown	0.005	0.008	-0.127		0.325	1	0.705	0.102	0.155	0.105		1	1	16				Lipo3	turquoise	0.003	0.005	-0.308		0.004	0.007	0.364	0.148	0.404	0.028		0	0	458				Bcap29	black	0.008	0.017	0.144		0.238	1	1.604	0.339	0.485
	Shb	yellow	0.001	0.002	-0.229		0.253	1	0.666	0.289	0.342	0.108		1	1	4				Tomm22	brown	0.003	0.005	-0.097		0.123	1	0.588	0.173	0.169	0.266		1	1	5				Rtfdc1	red	0.006	0.012	0.104		0.282	1	0.648	0.189	0.17
	Pcp4	greenyellow	0	0.001	-0.284		0.07	1	0.523	0.078	0.128	0.109		1	1	12				Pygo1	turquoise	0.003	0.005	0.133		0.723	1	1.13	0.109	0.312	0.059		0.008	1	128				Ube2f	red	0	0	0.1		0.2	1	1.671	0.161	0.151
	Epb41	tan	0.017	0.044	-0.192		0.091	1	0.546	0.11	0.089	0.109		0.997	1	30				Mrps30	brown	0.003	0.005	-0.137		0.316	1	0.709	0.186	0.147	0.408		1	1	13				Ulk3	turquoise	0.017	0.044	-0.214		0.005	0.011	0.312	0.491	0.609
	Bag1	salmon	0.004	0.007	-0.102		0.469	1	1.291	0.149	0.272	0.109		1	1	8				Polr1d	greenyellow	0.003	0.005	-0.111		0.586	1	0.83	0.404	0.689	0.271		0	0	549				Kpna2	black	0.003	0.007	0.145		0.923	1	1.038	0.246	0.206
	Fut11	green	0.002	0.004	0.154		0.28	1	1.465	0.077	0.066	0.111		1	1	17				Zfp597	green	0.004	0.006	0.163		0.908	1	1.041	0.524	0.495	0.609		0	0	312				Abhd14b	turquoise	0.007	0.014	-0.342		0.16	1	0.567	0.418	0.472
	Gnpda2	tan	0.018	0.049	0.125		0.821	1	1.082	0.072	0.023	0.112		1	1	9				Synj1	green	0.004	0.006	0.079		0.353	1	1.377	0.552	0.59	0.586		0	0	443				D930048N14Rik	turquoise	0	0.001	-0.521		0.378	1	0.701	0.332	0.438
	Glod4	tan	0	0	0.266		0.05	1	0.496	0.095	0.1	0.112		0.993	1	32				Smarca2	green	0.004	0.006	0.108		0.967	1	1.015	0.343	0.372	0.343		1	1	48				Rora	green	0.001	0.003	0.2		0.095	1	1.958	0.194	0.109
	Clip1	yellow	0.001	0.002	0.121		0.976	1	1.01	0.264	0.307	0.112		1	1	5				Magi3	blue	0.004	0.006	0.118		0.809	1	0.921	0.226	0.342	0.194		1	1	22				Rarg	black	0.007	0.015	-0.245		0.194	1	0.592	0.312	0.313
	Sst	yellow	0.005	0.009	0.227		0.362	1	1.38	0.13	0.171	0.113		0.602	1	46				Otud4	turquoise	0.003	0.006	0.135		0.421	1	0.759	0.176	0.209	0.243		1	1	9				Als2cl	turquoise	0.008	0.017	-0.304		0.005	0.014	0.318	0.439	0.532
	Kit	red	0.016	0.038	0.137		0.96	1	1.017	0.132	0.158	0.114		1	1	7				Golga3	magenta	0.003	0.006	0.08		0	0.001	3.627	0.454	0.222	0.525		1	1	36				Col6a1	turquoise	0.001	0.002	-0.608		0.239	1	0.622	0.448	0.528
	Ptpn7	black	0.001	0.002	-0.554		0.008	0.016	0.382	0.178	0.188	0.114		1	1	5				Klhl11	magenta	0.004	0.006	0.393		0	0	18.55	0.813	0.429	0.863		0	0.001	149				Fam192a	midnightblue	0.015	0.036	-0.075		0.131	1	0.543	0.271	0.36
	Uchl5	salmon	0.014	0.032	-0.103		0.93	1	1.031	0.156	0.217	0.115		1	1	1				Znrf3	green	0.004	0.006	0.162		0.781	1	1.101	0.192	0.13	0.305		1	1	33				Slc25a16	black	0.009	0.021	0.156		0.132	1	1.831	0.199	0.109
	Has3	yellow	0.001	0.001	0.272		0.428	1	1.323	0.228	0.294	0.116		1	1	4				Axl	midnightblue	0.004	0.006	0.118		0.005	0.009	2.696	0.348	0.227	0.462		1	1	27				Fxyd5	turquoise	0.018	0.046	-0.286		0.146	1	0.556	0.439	0.489
	Npepps	blue	0.017	0.045	-0.05		0.869	1	0.943	0.046	0.156	0.117		1	1	18				Ppp2r3a	green	0.004	0.007	0.128		0.601	1	1.197	0.479	0.558	0.465		0	0	280				Btbd10	greenyellow	0.016	0.038	0.086		0.524	1	1.289	0.328	0.277
	Kcnab3	yellow	0.016	0.037	-0.18		0.708	1	0.875	0.283	0.536	0.117		0.993	1	32				Smim14	brown	0.005	0.007	-0.077		0.099	1	0.567	0.334	0.419	0.293		1	1	22				Bub3	red	0.001	0.002	0.129		0.981	1	1.008	0.285	0.39
	Bcap29	turquoise	0.01	0.021	0.124		0.252	1	1.5	0.086	0.114	0.121		1	1	2				Gosr1	midnightblue	0.004	0.007	0.086		0.732	1	1.125	0.447	0.298	0.681		0	0	363				Rraga	black	0.009	0.02	0.075		0.352	1	0.687	0.236	0.187
	Chodl	yellow	0	0	0.562		0.322	1	0.703	0.115	0.053	0.121		0.996	1	31				Eed	brown	0.004	0.007	-0.125		0.223	1	0.658	0.408	0.523	0.382		0	0	286				Skiv2l2	black	0.006	0.012	0.11		0.897	1	0.949	0.42	0.522
	Cox19	green	0.017	0.046	-0.095		0.072	1	1.894	0.137	0.203	0.122		1	1	10				Tpgs2	lightgreen	0.005	0.007	0.09		0.73	1	1.126	0.614	0.777	0.391		0	0	239				Hbp1	midnightblue	0.009	0.022	-0.105		0.879	1	0.94	0.302	0.365
	Pld5	black	0.005	0.01	-0.333		0	0	0.237	0.15	0.172	0.122		1	1	5				Arsb	magenta	0.004	0.007	0.346		0	0	4.222	0.849	0.687	0.886		0	0	187				Ep400	magenta	0.013	0.031	-0.085		0.101	1	1.935	0.303	0.351
	Wdcp	blue	0.007	0.016	0.284		0.032	0.155	2.145	0.114	0.101	0.123		1	1	21				Cep68	salmon	0.005	0.007	-0.098		0.78	1	0.909	0.085	0.089	0.178		0	0	168				Wbp11	magenta	0	0.001	-0.129		0.238	1	0.621	0.156	0.102
	Akap1	red	0.001	0.002	0.107		0.148	1	1.67	0.178	0.329	0.124		1	1	22				Tmem70	cyan	0.004	0.007	0.105		0.935	1	0.973	0.153	0.147	0.289		1	1	6				Ap3m2	black	0	0	0.105		0.213	1	1.646	0.353	0.417
	Fbxo17	midnightblue	0	0.001	-0.391		0.486	1	0.781	0.294	0.505	0.125		1	1	17				Zfp354a	brown	0.004	0.007	-0.183		0.33	1	0.716	0.177	0.41	0.06		0	0	183				D030047H15Rik	turquoise	0.009	0.021	-0.469		0.111	1	0.524	0.536	0.639
	Dyrk1a	turquoise	0.015	0.033	0.096		0.433	1	1.319	0.063	0.031	0.126		1	1	18				Rab8b	blue	0.005	0.008	0.136		0.749	1	0.896	0.398	0.336	0.569		1	1	64				Adarb1	brown	0.004	0.008	0.119		0.218	1	1.638	0.292	0.351
	Cryab	yellow	0.007	0.016	-0.256		0.829	1	0.926	0.145	0.107	0.126		1	1	25				Phyh	turquoise	0.005	0.008	0.134		0.252	1	0.675	0.263	0.35	0.283		1	1	6				Gm45713	turquoise	0.007	0.015	-0.375		0.007	0.02	0.331	0.389	0.414
	Gpatch11	blue	0.012	0.028	0.097		0.009	0.02	2.538	0.045	0.002	0.127		0	0	133				Btbd3	lightgreen	0.005	0.008	0.165		0.132	1	1.682	0.929	0.773	0.792		1	1	42				Tsr1	blue	0.002	0.005	0.189		0.734	1	0.872	0.36	0.448
	Gstt2	yellow	0.017	0.044	-0.241		0.103	1	0.558	0.048	0.021	0.128		0.227	1	53				Dner	pink	0.005	0.008	0.149		0.4	1	1.337	0.137	0.152	0.161		1	1	2				Phkb	turquoise	0.015	0.037	0.11		0.397	1	1.402	0.159	0.081
	Fam110a	midnightblue	0.01	0.021	-0.164		0.985	1	1.006	0.1	0.078	0.128		1	1	2				Fastkd2	brown	0.005	0.008	-0.113		0.023	0.058	0.454	0.157	0.488	0.014		0	0	2387				Gpsm1	turquoise	0.018	0.044	-0.128		0.195	1	0.592	0.449	0.463
	Gfod2	purple	0.008	0.017	0.134		0.292	1	1.451	0.105	0.096	0.128		1	1	17				Tspan12	blue	0.006	0.009	0.173		0.981	1	1.009	0.33	0.382	0.329		1	1	17				Dnajc27	green	0.003	0.006	0.153		0.315	1	0.667	0.147	0.1
	Kcnk2	black	0	0	-0.229		0.415	1	0.749	0.189	0.24	0.13		1	1	19				Maz	purple	0.005	0.009	-0.105		0.476	1	0.783	0.41	0.421	0.514		1	1	40				Amigo3	turquoise	0.009	0.022	-0.346		0.03	1	0.413	0.501	0.568
	Tpgs2	cyan	0.005	0.008	0.093		0	0.001	3.713	0.096	0.112	0.133		1	1	20				Klf6	tan	0.006	0.009	0.17		0.626	1	1.183	0.288	0.281	0.383		1	1	17				Scg3	salmon	0.002	0.005	-0.122		0.839	1	1.083	0.392	0.747
	Brinp3	yellow	0.016	0.041	-0.19		0.928	1	0.968	0.186	0.193	0.134		1	1	27				Spata7	brown	0.006	0.009	-0.143		0.074	1	0.54	0.354	0.436	0.335		0	0	410				Slc6a6	magenta	0.01	0.022	-0.137		0.103	1	0.517	0.391	0.416
	Gpc4	yellow	0.002	0.003	0.236		0.965	1	0.984	0.227	0.318	0.134		1	1	19				Cog5	magenta	0.005	0.009	0.206		0.002	0.003	2.991	0.704	0.447	0.797		1	1	49				Rps6	magenta	0.004	0.008	0.2		0.237	1	0.621	0.097	0.049
	Slc35a5	turquoise	0.008	0.017	0.134		0.038	1	2.094	0.071	0.051	0.136		1	1	17				Zdhhc4	lightgreen	0.005	0.009	-0.116		0.301	1	1.429	0.483	0.3	0.557		1	1	9				Papln	turquoise	0.005	0.012	-0.542		0.008	0.022	0.337	0.476	0.534
	Apaf1	turquoise	0	0.001	0.151		0.871	1	1.059	0.1	0.188	0.137		1	1	13				Nrg3	blue	0.005	0.009	-0.132		0.002	0.004	0.339	0.125	0.206	0.159		1	1	32				Gm15122	turquoise	0.015	0.036	-0.411		0.481	1	0.753	0.599	0.714
	Mllt3	yellow	0.002	0.004	0.124		0.046	1	0.49	0.093	0.034	0.139		1	1	6				Ralyl	turquoise	0.006	0.01	0.121		0.557	1	0.818	0.533	0.712	0.559		1	1	22				Impa1	black	0.002	0.005	0.167		0.856	1	0.929	0.318	0.301
	Rae1	lightgreen	0.003	0.005	0.099		0.002	0.003	3.073	0.064	0.068	0.14		0.151	1	55				Rwdd4a	blue	0.006	0.01	0.101		0.193	1	0.639	0.586	0.654	0.576		0.998	1	75				4930579G18Rik	turquoise	0.009	0.021	-0.424		0.008	0.021	0.335	0.543	0.621
	Ftsj3	brown	0.018	0.048	-0.132		0.044	1	0.485	0.039	0.025	0.142		0	0	91				Ints6l	brown	0.006	0.01	-0.185		0.036	0.104	0.484	0.225	0.402	0.108		0	0	502				Bet1l	red	0.004	0.008	0.128		0.184	1	0.584	0.17	0.119
	Ufsp1	yellow	0.011	0.025	-0.124		0.913	1	0.962	0.089	0.042	0.142		0.602	1	46				Cep295	brown	0.006	0.011	-0.122		0.053	1	0.513	0.406	0.568	0.287		0	0	519				Nat10	turquoise	0.005	0.011	-0.159		0.794	1	0.9	0.236	0.135
	Zfp7	midnightblue	0	0	-0.266		0.957	1	0.981	0.064	0.028	0.144		1	1	12				Rif1	black	0.006	0.011	0.213		0.789	1	1.097	0.235	0.17	0.438		1	1	3				St8sia1	green	0.003	0.006	0.219		0.018	0.062	2.621	0.356	0.317
	A330009N23Rik	greenyellow	0.001	0.001	-0.187		0.977	1	0.989	0.059	0.034	0.145		1	1	2				Kifc5b	blue	0.007	0.011	-0.207		0.521	1	0.803	0.115	0.233	0.057		0	0	229				Rfk	black	0	0	0.158		0.797	1	1.107	0.281	0.293
	Fzd1	tan	0.002	0.003	0.205		0.485	1	1.279	0.076	0.012	0.145		0.151	1	55				Arid5b	magenta	0.006	0.011	0.447		0	0	10.365	0.632	0.122	0.78		0	0	451				Vwa5b2	turquoise	0.006	0.013	-0.489		0.231	1	0.617	0.581	0.68
	Ptgfrn	red	0.018	0.049	0.131		0.057	1	1.969	0.124	0.067	0.145		1	1	11				Col27a1	yellow	0.006	0.011	-0.436		0.002	0.004	0.342	0.287	0.582	0.072		1	1	35				Rab36	turquoise	0.005	0.01	-0.253		0.214	1	0.606	0.63	0.747
	Camk2n1	greenyellow	0.014	0.032	-0.135		0.195	1	0.63	0.138	0.169	0.146		1	1	6				Camsap2	blue	0.007	0.012	0.119		0.2	1	1.556	0.68	0.925	0.692		0	0	603				Top3b	turquoise	0.011	0.023	-0.186		0.895	1	0.948	0.484	0.489
	Abhd11	tan	0.001	0.001	-0.182		0.016	0.038	0.421	0.051	0.025	0.147		0	0	244				Smim8	brown	0.007	0.012	-0.14		0.138	1	0.6	0.39	0.681	0.182		0	0	490				Lrp5	yellow	0.014	0.032	-0.261		0.351	1	0.687	0.522	0.605
	Spr	brown	0.003	0.006	-0.141		0.996	1	0.998	0.119	0.141	0.148		1	1	7				Nfyb	turquoise	0.007	0.012	-0.119		0.045	0.171	0.5	0.241	0.744	0.038		0	0	929				Gpatch11	purple	0.001	0.003	0.14		0.111	1	1.899	0.352	0.248
	Tmem245	tan	0.003	0.004	0.116		0.999	1	1	0.207	0.205	0.149		1	1	11				Chn2	lightgreen	0.007	0.012	0.154		0.33	1	1.399	0.629	0.693	0.482		0.934	1	88				1600020E01Rik	pink	0.015	0.036	-0.181		0.032	1	0.416	0.259	0.274
	Hpf1	salmon	0.017	0.045	-0.116		0.995	1	1.002	0.219	0.499	0.151		1	1	20				Minos1	greenyellow	0.007	0.012	-0.099		0.878	1	1.055	0.52	0.502	0.685		0.998	1	75				Lrp12	green	0.009	0.021	0.125		0.291	1	1.525	0.45	0.53
	Stk4	red	0.004	0.007	0.119		0.814	1	1.086	0.104	0.065	0.152		0	0	90				Adamts5	turquoise	0.007	0.012	-0.196		0.012	0.027	0.418	0.104	0.159	0.116		1	1	35				Smg8	blue	0.013	0.032	0.097		0.179	1	1.715	0.385	0.251
	Slc45a1	lightcyan	0.001	0.002	-0.146		0.502	1	0.788	0.122	0.219	0.152		1	1	27				Tmtc2	lightgreen	0.007	0.012	0.188		0	0.001	3.623	0.477	0.35	0.48		1	1	34				Srrm2	turquoise	0.014	0.035	-0.264		0.005	0.009	0.31	0.671	0.798
	Lrtm2	yellow	0.006	0.012	-0.125		0.463	1	1.295	0.249	0.363	0.153		1	1	26				Zfp322a	blue	0.007	0.013	0.125		0.261	1	0.68	0.594	0.592	0.677		1	1	47				Chchd7	pink	0.002	0.005	-0.23		0.044	1	0.44	0.185	0.163
	Wnt2	black	0.004	0.006	-0.396		0.317	1	0.7	0.252	0.329	0.154		1	1	10				Cbfb	purple	0.007	0.013	0.157		0.325	1	1.404	0.377	0.271	0.722		1	1	16				Hdhd2	greenyellow	0.009	0.02	0.116		0.746	1	0.877	0.381	0.294
	Ddi2	yellow	0.014	0.032	0.083		0.739	1	0.888	0.041	0.007	0.156		1	1	21				Hmgcs1	blue	0.007	0.013	0.134		0.024	0.062	0.456	0.298	0.496	0.16		0	0	286				Sema4a	turquoise	0.017	0.042	-0.197		0.234	1	0.619	0.674	0.813
	Dhx29	yellow	0	0	0.131		0.58	1	1.215	0.246	0.176	0.156		1	1	5				Vamp7-ps	midnightblue	0.007	0.013	0.214		0.005	0.01	2.656	0.599	0.535	0.643		0.984	1	82				Grin1os	turquoise	0.009	0.021	-0.558		0.001	0.001	0.24	0.521	0.583
	Rps19bp1	green	0.015	0.035	0.109		0.042	1	2.062	0.081	0.251	0.158		1	1	10				Lmbrd2	magenta	0.007	0.013	0.5		0	0	22.577	0.86	0.553	0.905		1	1	43				Ring1	turquoise	0.014	0.032	-0.249		0.038	1	0.429	0.643	0.723
	Mfap3	tan	0.002	0.003	0.168		0.043	1	2.053	0.148	0.091	0.158		1	1	16				Idi1	magenta	0.007	0.013	0.276		0.011	0.023	2.442	0.389	0.098	0.619		0	0	193				Robo2	brown	0.012	0.028	0.19		0.692	1	1.17	0.378	0.519
	Tmem123	yellow	0.01	0.021	0.185		0.243	1	1.512	0.156	0.141	0.159		1	1	14				Sp3os	brown	0.007	0.013	-0.16		0.246	1	0.671	0.171	0.315	0.094		0	0	870				Dpy30	yellow	0.017	0.042	0.118		0.016	0.055	2.66	0.363	0.312
	Samd12	blue	0.004	0.006	0.361		0.126	1	1.721	0.059	0.008	0.16		0	0	109				Wdr1	magenta	0.007	0.013	0.083		0.123	1	1.705	0.191	0.17	0.245		1	1	20				Sox4	brown	0.008	0.018	0.265		0.06	1	2.135	0.443	0.45
	Ankfy1	yellow	0.005	0.009	0.063		0.938	1	0.972	0.253	0.27	0.161		0.993	1	32				Lrrc57	purple	0.008	0.014	0.104		0.153	1	0.612	0.5	0.657	0.396		1	1	20				Mllt3	blue	0.003	0.007	0.137		0.601	1	1.231	0.394	0.331
	Vwc2	yellow	0.018	0.049	0.155		0.095	1	0.551	0.43	0.616	0.161		1	1	13				Smim10l1	turquoise	0.007	0.014	-0.202		0.091	1	0.559	0.329	0.633	0.157		0	0	185				Mir124a-1hg	turquoise	0.006	0.012	-0.323		0.03	1	0.412	0.675	0.766
	Slc22a4	yellow	0.004	0.007	-0.245		0.506	1	1.264	0.165	0.094	0.163		1	1	3				Tatdn1	brown	0.007	0.014	-0.16		0.201	1	0.645	0.368	0.49	0.295		0	0	378				Eps15	blue	0.014	0.035	0.143		0.067	1	2.094	0.548	0.652
	Snrpn	red	0.011	0.022	-0.081		0.518	1	0.795	0.104	0.066	0.164		1	1	7				Pcgf3	yellow	0.008	0.014	0.068		0.415	1	0.756	0.352	0.479	0.252		0	0	241				Ybx2	turquoise	0.018	0.05	-0.448		0.016	0.056	0.375	0.595	0.627
	Ptcd1	red	0.001	0.002	0.164		0.083	1	1.851	0.103	0.035	0.165		0.544	1	47				Aass	blue	0.007	0.014	0.23		0.1	1	1.766	0.145	0.203	0.168		1	1	30				P3h3	turquoise	0.012	0.027	-0.403		0.015	0.052	0.37	0.673	0.751
	Wdr59	grey60	0	0	0.149		0.736	1	0.887	0.103	0.056	0.165		1	1	14				C230004F18Rik	brown	0.008	0.014	-0.183		0.916	1	0.965	0.163	0.278	0.126		1	1	43				Nckap5l	turquoise	0.01	0.022	-0.307		0.015	0.049	0.369	0.684	0.771
	Gabbr2	salmon	0.015	0.035	0.14		0.976	1	1.01	0.07	0.057	0.166		0.997	1	30				Rangap1	royalblue	0.008	0.014	0.097		0.074	1	1.858	0.565	0.514	0.675		1	1	37				Slc35a5	blue	0.01	0.023	0.144		0.215	1	1.643	0.46	0.363
	Epb41l4a	yellow	0.003	0.006	0.241		0.988	1	1.005	0.412	0.563	0.167		0.999	1	28				Zfp24	blue	0.008	0.015	0.116		0.58	1	1.21	0.463	0.66	0.385		1	1	28				AI480526	turquoise	0.007	0.014	-0.327		0.116	1	0.53	0.662	0.718
	Gne	grey60	0.015	0.033	0.079		0.61	1	1.197	0.175	0.135	0.17		1	1	11				Orc2	turquoise	0.008	0.015	0.094		0.672	1	0.865	0.261	0.363	0.292		0.957	1	86				Uckl1	blue	0.006	0.012	-0.18		0.341	1	1.463	0.383	0.21
	Zfp239	green	0	0	0.198		0	0	3.933	0.081	0.023	0.172		0	0	121				Snx18	blue	0.008	0.015	0.108		0.664	1	1.162	0.246	0.175	0.447		1	1	11				Rnf168	blue	0.007	0.014	0.119		0.441	1	1.36	0.411	0.278
	Mrpl3	brown	0.012	0.025	-0.078		0.681	1	1.156	0.1	0.079	0.172		1	1	24				Irs2	magenta	0.008	0.015	0.476		0	0	8.042	0.945	0.769	0.968		0	0	337				Inha	purple	0.007	0.015	-0.294		0.836	1	1.085	0.639	0.717
	Pgbd5	red	0.015	0.035	0.081		0.558	1	1.23	0.221	0.308	0.173		1	1	0				P2ry1	brown	0.008	0.015	-0.174		0.062	1	0.525	0.151	0.377	0.032		0	0	416				Leprotl1	black	0.003	0.006	0.101		0.59	1	1.239	0.427	0.325
	Gm4793	cyan	0.001	0.001	-0.517		0.43	1	0.756	0.146	0.161	0.176		1	1	5				6430511E19Rik	blue	0.008	0.015	0.206		0.345	1	1.384	0.165	0.26	0.145		0	0	245				Usp48	purple	0.011	0.024	-0.206		0.421	1	0.723	0.64	0.747
	Cav2	purple	0.009	0.018	0.225		0.994	1	1.002	0.051	0.079	0.177		1	1	11				Clpb	royalblue	0.008	0.015	0.091		0.18	1	1.589	0.473	0.523	0.476		1	1	26				Mapk7	turquoise	0.011	0.025	-0.231		0.013	0.04	0.363	0.738	0.86
	Bdh1	midnightblue	0.01	0.021	0.087		0.084	1	0.539	0.125	0.095	0.182		1	1	2				Lnpk	turquoise	0.009	0.016	0.146		0.207	1	0.648	0.546	0.551	0.715		1	1	27				Ssc5d	turquoise	0.006	0.012	-0.597		0.003	0.007	0.292	0.639	0.682
	Opalin	yellow	0.001	0.002	-0.365		0.874	1	0.945	0.184	0.063	0.182		1	1	2				Tmed5	turquoise	0.009	0.016	0.169		0.98	1	1.009	0.361	0.637	0.27		0	0	270				Lpgat1	green	0.008	0.019	0.127		0.236	1	1.607	0.514	0.461
	Smarca2	tan	0.004	0.007	0.109		0.935	1	0.971	0.187	0.11	0.182		1	1	7				Fam84a	lightgreen	0.009	0.016	0.148		0.376	1	1.357	0.933	0.68	0.887		0.998	1	75				Usp31	green	0.003	0.007	0.14		0.403	1	1.396	0.633	0.665
	Mtfmt	yellow	0.018	0.047	0.103		0.794	1	1.096	0.282	0.312	0.184		0.76	1	43				Ubqln4	pink	0.009	0.016	-0.076		0.798	1	0.917	0.257	0.315	0.246		1	1	12				Chn1	red	0.01	0.023	0.103		0.132	1	1.831	0.568	0.568
	Gpr149	black	0.011	0.024	-0.284		0.089	1	0.544	0.369	0.508	0.186		1	1	16				Pcdhb16	salmon	0.009	0.016	-0.2		0.569	1	0.823	0.041	0.079	0.056		0	0	821				Atxn2l	turquoise	0.012	0.029	-0.293		0.005	0.012	0.317	0.773	0.821
	Slc35b4	yellow	0.006	0.012	0.103		0.184	1	0.623	0.127	0.048	0.188		1	1	7				Arl6ip6	turquoise	0.009	0.017	0.126		0.394	1	0.746	0.406	0.442	0.512		1	1	3				Vmp1	greenyellow	0.011	0.023	0.117		0.176	1	1.72	0.665	0.696
	Ppfibp2	yellow	0.009	0.02	-0.206		0.165	1	0.61	0.222	0.133	0.188		1	1	5				Tmprss9	pink	0.009	0.017	-0.266		0.235	1	0.665	0.287	0.333	0.283		1	1	20				Pcgf2	turquoise	0.006	0.012	-0.292		0.011	0.031	0.354	0.794	0.841
	Appl2	blue	0.014	0.032	-0.173		0.49	1	1.276	0.12	0.063	0.189		1	1	12				Prkca	lightgreen	0.009	0.017	0.132		0.345	1	1.385	0.671	0.632	0.554		1	1	19				Leng8	turquoise	0.005	0.01	-0.452		0.002	0.005	0.283	0.715	0.758
	Arhgef25	yellow	0.009	0.019	-0.223		0.937	1	0.972	0.279	0.273	0.19		1	1	4				Arhgap20	blue	0.009	0.017	0.137		0.7	1	1.142	0.178	0.24	0.169		0	0	165				Col5a3	turquoise	0.017	0.041	-0.465		0.055	1	0.459	0.827	0.859
	Pkd1l3	purple	0.012	0.027	0.233		0.004	0.007	2.861	0.141	0.12	0.191		1	1	10				Usp9x	magenta	0.009	0.017	0.226		0	0	12.636	0.74	0.23	0.818		0.069	1	118				Pabpn1	turquoise	0.008	0.02	-0.299		0.031	1	0.415	0.837	0.872
	Gm37212	black	0	0	-0.732		0.002	0.003	0.322	0.386	0.529	0.191		1	1	9				Apba1	magenta	0.009	0.017	0.134		0.009	0.02	2.479	0.447	0.474	0.488		0.412	1	105
	Slc48a1	tan	0.002	0.003	-0.094		0.711	1	1.139	0.22	0.166	0.193		1	1	2				Apba2	red	0.009	0.017	0.114		0.613	1	1.19	0.275	0.246	0.384		1	1	40
	Rbm11	yellow	0.001	0.002	0.21		0.109	1	1.766	0.378	0.557	0.193		1	1	8				Eml5	red	0.01	0.019	-0.164		0.607	1	0.839	0.543	0.685	0.552		0	0	249				Proser3	turquoise	0.019	0.051	-0.238		0.058	1	0.463	0.178	0.352
	Htr7	purple	0.003	0.004	-0.227		0.473	1	0.775	0.105	0.086	0.194		1	1	10				Snapin	turquoise	0.01	0.019	-0.082		0.542	1	0.812	0.136	0.506	0.028		0	0	948				Ubp1	purple	0.019	0.052	-0.156		0.9	1	0.95	0.54	0.624
	Slc35g2	red	0.008	0.017	-0.15		0.968	1	0.985	0.095	0.057	0.196		0.993	1	32				Tctn2	pink	0.01	0.019	-0.122		0.522	1	0.803	0.213	0.286	0.177		1	1	7				Bola3	red	0.019	0.054	0.13		0.021	0.099	2.545	0.173	0.12
	Tecr	brown	0.014	0.033	-0.099		0.23	1	0.652	0.188	0.231	0.197		1	1	19				Bbs12	greenyellow	0.01	0.019	-0.159		0.085	1	0.552	0.325	0.317	0.422		0.006	1	129				Celf5	turquoise	0.02	0.055	-0.117		0.015	0.052	0.371	0.383	0.563
	Tcf12	tan	0.007	0.015	0.12		0.726	1	1.131	0.314	0.356	0.198		1	1	2				Kitl	blue	0.011	0.02	0.177		0.446	1	1.3	0.484	0.721	0.425		0.003	1	131				Aifm3	turquoise	0.02	0.056	-0.188		0.121	1	0.534	0.524	0.767
	Dhcr24	midnightblue	0.011	0.022	-0.173		0.829	1	0.926	0.173	0.135	0.199		1	1	5				Kifc2	pink	0.01	0.02	-0.134		0.09	1	0.558	0.687	0.758	0.635		1	1	6				Thbs3	turquoise	0.02	0.057	-0.295		0.037	1	0.427	0.752	0.775
	Klhdc8b	purple	0.003	0.006	0.155		0.726	1	1.131	0.304	0.512	0.199		1	1	7				Tyw5	brown	0.011	0.02	-0.156		0.327	1	0.714	0.437	0.488	0.469		0	0	234				Slc44a2	turquoise	0.02	0.057	-0.187		0.415	1	0.72	0.472	0.453
	Evi2a	yellow	0.003	0.005	-0.278		0.541	1	0.805	0.233	0.133	0.202		1	1	7				Cuedc1	lightyellow	0.01	0.02	-0.184		0.232	1	0.663	0.291	0.4	0.226		1	1	2				Col27a1	turquoise	0.02	0.057	-0.433		0.408	1	0.717	0.299	0.602
	Ube2g2	lightgreen	0.011	0.023	-0.094		0.747	1	1.12	0.153	0.218	0.203		1	1	11				Amph	magenta	0.01	0.02	0.095		0.258	1	1.477	0.254	0.249	0.331		1	1	70				Washc3	yellow	0.02	0.057	0.118		0.49	1	1.317	0.363	0.421
	Rflnb	yellow	0	0	-0.513		0.06	1	0.511	0.18	0.096	0.204		1	1	0				Wls	blue	0.01	0.02	0.15		0.851	1	1.067	0.108	0.038	0.35		1	1	30				Tmem68	black	0.02	0.057	0.152		0.305	1	1.507	0.245	0.088
	Ppp1r14a	yellow	0.008	0.017	-0.289		0.032	0.154	2.148	0.182	0.081	0.205		1	1	14				Ptprg	green	0.011	0.021	0.13		0.982	1	1.008	0.598	0.625	0.613		1	1	67				Fus	turquoise	0.02	0.058	-0.158		0.071	1	0.481	0.471	0.583
	Slc8a3	midnightblue	0.013	0.03	-0.12		0.571	1	0.818	0.18	0.136	0.206		1	1	0				Rabggta	pink	0.011	0.021	-0.104		0.143	1	0.605	0.568	0.557	0.646		1	1	41				Terf2	magenta	0.021	0.058	-0.093		0.403	1	1.396	0.42	0.508
	Epyc	black	0.015	0.036	-0.311		0.084	1	0.54	0.346	0.403	0.206		1	1	8				Gspt1	green	0.011	0.021	0.116		0.945	1	1.025	0.415	0.439	0.428		0.998	1	75				Zfp740	turquoise	0.02	0.058	-0.124		0.846	1	1.08	0.239	0.169
	BC030500	yellow	0.004	0.007	-0.161		0.77	1	0.901	0.389	0.451	0.207		1	1	7				Cmtm4	magenta	0.011	0.021	0.124		0.001	0.002	3.1	0.455	0.169	0.59		0.001	1	137				4930402H24Rik	turquoise	0.02	0.058	-0.109		0.1	1	0.513	0.185	0.315
	Myl6	brown	0.015	0.033	-0.15		0.057	1	0.506	0.188	0.26	0.208		1	1	5				Tmod1	magenta	0.011	0.021	0.181		0.016	0.038	2.308	0.306	0.133	0.444		0	1	141				Spaca6	turquoise	0.021	0.06	-0.25		0.051	1	0.452	0.566	0.7
	Fkbp2	turquoise	0.001	0.002	-0.171		0.877	1	1.056	0.217	0.489	0.208		1	1	24				Fam57b	yellow	0.012	0.022	-0.201		0.026	0.071	0.463	0.349	0.42	0.285		1	1	35				Pomgnt1	turquoise	0.021	0.061	-0.081		0.105	1	0.519	0.328	0.431
	Mcmbp	yellow	0	0	0.13		0.381	1	1.362	0.334	0.323	0.208		1	1	13				Rpp14	turquoise	0.012	0.022	-0.074		0.093	1	0.56	0.321	0.477	0.249		0	0	376				Fbxw4	midnightblue	0.021	0.062	-0.147		0.396	1	1.403	0.307	0.552
	Stau2	purple	0.004	0.007	-0.109		0.568	1	0.816	0.281	0.547	0.209		0.486	1	48				Klhl5	lightgreen	0.011	0.022	0.097		0.807	1	0.92	0.75	0.653	0.689		0	0	161				Bmp1	turquoise	0.021	0.063	-0.282		0.124	1	0.537	0.711	0.774
	Mme	black	0	0	-0.449		0	0	0.244	0.382	0.527	0.21		0.805	1	42				Prr22	yellow	0.011	0.022	-0.394		0.305	1	0.704	0.469	0.571	0.399		1	1	54				Ano6	purple	0.021	0.063	-0.179		0.892	1	0.946	0.332	0.5
	Rasgrf1	yellow	0	0	-0.273		0.309	1	1.433	0.198	0.133	0.212		1	1	20				Cebpzos	turquoise	0.012	0.022	-0.152		0.003	0.005	0.351	0.177	0.348	0.076		0.003	1	132				Plekhn1	turquoise	0.021	0.063	-0.453		0.747	1	0.878	0.201	0.331
	Lrrc1	yellow	0.002	0.004	0.172		0.719	1	1.135	0.329	0.367	0.214		1	1	11				Dpp7	blue	0.011	0.022	-0.147		0.833	1	0.931	0.205	0.292	0.212		1	1	16				Col24a1	black	0.022	0.068	-0.424		0.134	1	0.545	0.238	0.23
	Kctd8	black	0.016	0.04	-0.203		0.539	1	1.242	0.164	0.164	0.216		0.805	1	42				Xpa	brown	0.011	0.022	-0.137		0.138	1	0.601	0.229	0.24	0.292		1	1	13				Klhl9	purple	0.021	0.068	0.142		0.324	1	1.484	0.339	0.269
	Trpc4	black	0.014	0.032	0.146		0.43	1	1.322	0.168	0.133	0.216		1	1	4				Cpne3	purple	0.012	0.023	0.119		0.543	1	0.812	0.428	0.55	0.373		1	1	17				Ppp1r13l	turquoise	0.022	0.071	-0.255		0.091	1	0.504	0.344	0.485
	Fam163b	black	0.013	0.029	-0.169		0.182	1	1.604	0.166	0.151	0.218		1	1	18				Sash1	lightgreen	0.012	0.023	0.114		0.466	1	1.286	0.788	0.694	0.679		0.337	1	107				Cep290	purple	0.022	0.071	0.182		0.005	0.012	3.127	0.123	0.47
	Maged1	lightyellow	0.013	0.029	0.065		0.649	1	1.174	0.54	0.739	0.221		1	1	24				Sycp2	brown	0.012	0.023	-0.213		0.108	1	0.575	0.285	0.598	0.107		0	0	1405				Atxn7l2	turquoise	0.022	0.073	-0.318		0.048	1	0.447	0.843	0.815
	Zfp637	brown	0.006	0.012	-0.097		0.952	1	0.978	0.138	0.124	0.225		1	1	16				Zfp157	brown	0.012	0.023	-0.152		0.007	0.014	0.394	0.173	0.266	0.085		0	0	492				Mapre1	purple	0.022	0.073	0.087		0.147	1	1.791	0.253	0.246
	Dok7	black	0.013	0.029	-0.208		0.843	1	0.932	0.194	0.156	0.226		1	1	1				Pstk	brown	0.012	0.023	-0.142		0.953	1	0.981	0.207	0.325	0.179		0	0	436				Dot1l	turquoise	0.022	0.074	-0.256		0.092	1	0.505	0.845	0.839
	Clgn	yellow	0	0.001	-0.254		0.555	1	1.231	0.156	0.095	0.229		0.602	1	46				Fgd4	green	0.013	0.024	0.15		0.608	1	1.193	0.509	0.579	0.474		0	0	251				Tmem198b	yellow	0.022	0.078	-0.241		0.093	1	0.506	0.251	0.253
	Ankk1	black	0.017	0.046	-0.423		0.642	1	0.848	0.239	0.233	0.23		1	1	8				Nol9	yellow	0.012	0.024	-0.138		0.23	1	0.662	0.514	0.507	0.555		1	1	3				Ptgfrn	brown	0.022	0.078	0.144		0.515	1	1.296	0.198	0.166
	Add3	turquoise	0.004	0.007	0.107		0.033	0.155	2.143	0.176	0.234	0.231		0.998	1	29				Ext1	blue	0.013	0.024	0.116		0.539	1	1.236	0.198	0.27	0.186		1	1	8				Carmil3	turquoise	0.022	0.079	-0.32		0.004	0.007	0.299	0.73	0.748
	Trnau1ap	brown	0.016	0.039	-0.12		0.149	1	1.667	0.2	0.243	0.232		1	1	8				Mrpl35	brown	0.013	0.025	-0.084		0.015	0.035	0.429	0.448	0.734	0.187		1	1	50				Luzp1	blue	0.023	0.079	0.109		0.28	1	1.541	0.118	0.045
	Thsd7b	yellow	0.011	0.022	0.182		0.501	1	0.788	0.384	0.471	0.234		1	1	22				Col11a2	yellow	0.013	0.026	-0.354		0.036	0.102	0.483	0.594	0.643	0.575		1	1	11				Cnot10	purple	0.023	0.08	-0.111		0.63	1	1.211	0.246	0.455
	Nfatc2	yellow	0.011	0.023	-0.203		0.126	1	0.579	0.31	0.239	0.235		1	1	10				Lrrc8b	magenta	0.013	0.026	0.381		0	0	6.814	0.937	0.775	0.924		0	0	202				Fam193b	turquoise	0.023	0.081	-0.311		0.157	1	0.564	0.881	0.9
	Mal2	green	0.005	0.01	-0.138		0.279	1	1.467	0.044	0.025	0.237		0	0	118				Phpt1	lightyellow	0.013	0.026	-0.17		0.579	1	0.827	0.284	0.249	0.332		1	1	8				Fchsd1	magenta	0.023	0.081	-0.258		0.029	1	0.411	0.556	0.581
	Pde1c	black	0.012	0.026	-0.278		0.581	1	0.822	0.233	0.228	0.24		1	1	17				Susd4	cyan	0.013	0.026	0.109		0.563	1	0.82	0.221	0.47	0.144		0.209	1	111				Zfp410	magenta	0.023	0.081	-0.082		0.668	1	1.186	0.132	0.279
	Ankmy2	grey60	0.013	0.03	0.095		0.692	1	1.15	0.116	0.033	0.241		1	1	12				Pcdh10	green	0.014	0.027	0.147		0.015	0.037	2.332	0.716	0.735	0.818		0	0	321				Tmem86b	turquoise	0.023	0.083	-0.362		0.31	1	0.664	0.484	0.561
	Mrto4	brown	0.007	0.015	-0.105		0.485	1	1.28	0.172	0.168	0.242		1	1	8				Xpr1	green	0.014	0.027	0.114		0.324	1	1.404	0.535	0.497	0.606		0	0	220				Heatr5b	brown	0.023	0.083	0.127		0.231	1	1.616	0.444	0.585
	Apba1	blue	0	0	0.207		0.015	0.034	2.393	0.192	0.216	0.243		1	1	27				Maip1	turquoise	0.013	0.027	-0.105		0.786	1	0.912	0.298	0.563	0.226		0	0	205				Nol9	turquoise	0.023	0.083	-0.146		0.189	1	0.588	0.212	0.243
	Ado	purple	0.006	0.011	-0.119		0.45	1	0.765	0.284	0.364	0.246		1	1	16				Dpy19l1	turquoise	0.014	0.027	0.128		0.732	1	0.89	0.178	0.365	0.11		1	1	70				Gm14286	turquoise	0.023	0.084	-0.356		0.16	1	0.567	0.693	0.686
	Grik1	cyan	0.005	0.01	-0.337		0.518	1	0.795	0.148	0.097	0.247		1	1	7				Uba52	blue	0.014	0.027	-0.232		0.252	1	0.675	0.125	0.222	0.069		1	1	33				Dusp11	blue	0.023	0.084	-0.175		0.642	1	0.829	0.457	0.592
	Scrn3	turquoise	0.001	0.002	0.181		0.157	1	0.604	0.039	0.015	0.249		0	0	252				Mpp1	blue	0.014	0.028	-0.068		0.051	0.252	0.509	0.235	0.374	0.222		0	0	158				Usp35	turquoise	0.024	0.085	-0.154		0.696	1	1.168	0.23	0.261
	Galnt10	yellow	0.001	0.002	0.229		0.123	1	1.728	0.291	0.233	0.254		1	1	20				Tex2	midnightblue	0.014	0.028	0.092		0.001	0.002	3.186	0.515	0.339	0.621		1	1	17				Ankrd24	turquoise	0.024	0.093	-0.25		0.066	1	0.474	0.65	0.695
	Crebl2	royalblue	0.017	0.047	0.103		0.054	1	1.983	0.364	0.552	0.256		0.993	1	32				Gm13577	black	0.014	0.028	0.294		0.652	1	1.168	0.147	0.195	0.158		1	1	54				Arhgef40	turquoise	0.024	0.094	-0.159		0.526	1	0.775	0.373	0.504
	Aspa	yellow	0.012	0.026	-0.26		0.458	1	1.3	0.194	0.072	0.257		1	1	2				Erc1	magenta	0.014	0.028	0.108		0	0	4.201	0.553	0.257	0.643		0	0	212				Gtf2f2	red	0.024	0.094	0.103		0.105	1	1.92	0.342	0.411
	Bcas1	yellow	0	0.001	-0.291		0.262	1	0.671	0.257	0.119	0.261		0	0	102				Cdc25b	yellow	0.014	0.028	-0.199		0.278	1	0.689	0.237	0.237	0.282		1	1	41				Prox2os	turquoise	0.025	0.096	-0.336		0.461	1	0.743	0.157	0.168
	Ctps	grey60	0.003	0.006	0.068		0.084	1	1.848	0.14	0.027	0.263		1	1	22				Zc2hc1a	turquoise	0.014	0.029	0.128		0.304	1	0.703	0.607	0.701	0.635		1	1	16				Brpf3	magenta	0.025	0.098	-0.126		0.984	1	0.991	0.442	0.542
	Gm29216	pink	0.005	0.009	-0.36		0	0	5.343	0.126	0.195	0.264		1	1	5				Hpf1	brown	0.014	0.029	-0.115		0.34	1	0.721	0.411	0.566	0.319		0	0	263				Adgra2	turquoise	0.025	0.104	-0.201		0.088	1	0.501	0.374	0.417
	Fam206a	yellow	0	0	0.152		0.021	0.057	2.275	0.425	0.572	0.264		1	1	17				Sema4c	black	0.014	0.029	-0.158		0.793	1	0.914	0.328	0.306	0.452		1	1	32				Meg3	turquoise	0.025	0.105	-0.312		0.141	1	0.551	0.785	0.834
	Dnajc15	yellow	0.016	0.041	-0.101		0.579	1	1.216	0.209	0.104	0.267		1	1	21				Krba1	yellow	0.014	0.029	-0.23		0.008	0.016	0.396	0.487	0.483	0.629		1	1	26				Rogdi	turquoise	0.025	0.105	-0.136		0.557	1	0.79	0.208	0.157
	Osbpl6	grey60	0.018	0.048	-0.106		0.074	1	1.889	0.231	0.123	0.267		1	1	1				Bop1	black	0.014	0.029	-0.118		0.167	1	0.622	0.203	0.238	0.195		1	1	6				Mapk10	black	0.025	0.106	0.073		0.783	1	1.116	0.761	0.79
	Mal	yellow	0.003	0.006	-0.293		0.103	1	0.559	0.324	0.215	0.267		1	1	4				Rasgrp2	black	0.014	0.029	-0.217		0.47	1	0.781	0.208	0.29	0.16		1	1	3				Mirg	turquoise	0.025	0.108	-0.262		0.227	1	0.614	0.622	0.602
	Pls1	grey60	0.001	0.002	-0.235		0.13	1	0.582	0.273	0.313	0.268		1	1	11				Cdh2	green	0.014	0.03	0.192		0.008	0.016	2.537	0.543	0.428	0.694		1	1	71				Adam15	turquoise	0.025	0.108	-0.264		0.382	1	0.703	0.641	0.824
	Rab15	black	0.004	0.007	-0.123		0.91	1	0.96	0.253	0.215	0.273		1	1	11				B3gat1	yellow	0.014	0.03	-0.126		0.09	1	0.557	0.434	0.477	0.402		1	1	1				Ica1l	salmon	0.026	0.113	-0.087		0.724	1	0.867	0.231	0.547
	Tac1	midnightblue	0	0	-0.381		0.411	1	0.746	0.208	0.178	0.274		1	1	10				Chst12	black	0.014	0.03	-0.136		0.369	1	0.735	0.241	0.264	0.262		1	1	11				Grn	turquoise	0.026	0.116	-0.118		0.363	1	0.693	0.093	0.045
	Slirp	salmon	0.002	0.003	-0.214		0.143	1	0.593	0.116	0.178	0.275		0	0.001	78				Usp48	darkred	0.014	0.03	-0.17		0.259	1	0.679	0.707	0.751	0.728		1	1	3				Arid3a	turquoise	0.026	0.117	-0.169		0.132	1	0.544	0.172	0.32
	Sh3kbp1	purple	0.017	0.043	-0.106		0.375	1	1.368	0.315	0.343	0.275		1	1	5				Myo19	yellow	0.014	0.03	-0.228		0.889	1	0.954	0.213	0.416	0.109		1	1	12				Atad3a	turquoise	0.026	0.118	-0.18		0.583	1	0.802	0.519	0.536
	Pdzrn3	greenyellow	0.01	0.021	0.294		0.743	1	1.122	0.348	0.599	0.275		1	1	21				Ctdnep1	tan	0.014	0.03	-0.066		0.671	1	1.157	0.403	0.352	0.599		1	1	3				Ccdc57	turquoise	0.026	0.118	-0.24		0.37	1	0.697	0.432	0.37
	Ppp1r12b	red	0.007	0.014	0.127		0.462	1	1.296	0.319	0.3	0.278		1	1	8				Jmy	green	0.015	0.031	0.112		0.803	1	0.918	0.51	0.486	0.584		0	0	177				Gm37939	turquoise	0.026	0.118	-0.326		0.262	1	0.636	0.347	0.375
	Stk32c	yellow	0.002	0.004	-0.148		0.036	0.213	0.471	0.331	0.269	0.279		1	1	4				Ywhag	midnightblue	0.015	0.031	0.078		0.009	0.019	2.489	0.602	0.416	0.702		1	1	11				Sema4g	turquoise	0.026	0.119	-0.261		0.033	1	0.42	0.558	0.605
	Tmem231	grey60	0.009	0.019	0.087		0.796	1	0.912	0.176	0.078	0.283		1	1	6				Slc9a5	yellow	0.015	0.031	-0.208		0.256	1	0.677	0.413	0.355	0.546		1	1	18				Clcn2	turquoise	0.026	0.124	-0.205		0.882	1	1.06	0.2	0.306
	Drd1	black	0	0	-0.472		0	0.001	0.256	0.363	0.403	0.285		1	1	6				Gsr	turquoise	0.015	0.031	-0.08		0.052	0.28	0.511	0.217	0.307	0.184		1	1	13				Mief1	blue	0.027	0.153	0.065		0.192	1	1.686	0.145	0.049
	Coq6	green	0.017	0.047	-0.102		0.438	1	1.315	0.28	0.307	0.287		0	0.001	77				Thsd1	yellow	0.015	0.031	-0.243		0.438	1	0.767	0.189	0.311	0.113		1	1	12				Clasrp	turquoise	0.027	0.155	-0.259		0.09	1	0.503	0.815	0.827
	Jmy	tan	0.01	0.021	0.122		0.051	1	2.004	0.139	0.027	0.29		0.32	1	51				Plekhh3	purple	0.015	0.031	-0.19		0.373	1	0.737	0.174	0.274	0.11		1	1	28				Plxnb2	greenyellow	0.027	0.159	-0.137		0.797	1	1.107	0.41	0.445
	Rab8b	turquoise	0.016	0.039	0.119		0.233	1	1.526	0.156	0.119	0.297		1	1	27				Trhde	lightgreen	0.015	0.032	0.162		0.663	1	1.162	0.678	0.488	0.639		0.957	1	86				Lrrtm3	black	0.027	0.159	0.114		0.061	1	2.127	0.505	0.525
	D430041D05Rik	purple	0.015	0.034	-0.095		0.813	1	1.086	0.24	0.202	0.299		0	0	93				Stxbp5	blue	0.015	0.032	0.087		0.479	1	1.276	0.303	0.238	0.483		1	1	22				Bicd2	turquoise	0.027	0.159	-0.108		0.845	1	0.924	0.262	0.219
	Otud1	yellow	0.008	0.017	0.147		0.402	1	0.742	0.509	0.585	0.301		1	1	5				Gstcd	blue	0.015	0.032	0.137		0.989	1	0.996	0.097	0.152	0.077		1	1	12				Ryr3	black	0.027	0.159	-0.178		0.947	1	0.973	0.243	0.291
	Tomm34	purple	0.002	0.003	0.103		0.87	1	0.943	0.301	0.328	0.302		1	1	17				Tdrkh	lightgreen	0.015	0.033	-0.095		0.468	1	1.284	0.454	0.554	0.678		0	0	157				Arrb2	turquoise	0.028	0.166	-0.153		0.335	1	0.678	0.267	0.313
	Cntnap2	blue	0.012	0.026	0.119		0.007	0.014	2.639	0.269	0.181	0.304		0.878	1	40				Gabrb2	magenta	0.015	0.033	0.402		0	0	13.303	0.944	0.775	0.935		1	1	34				Zdhhc4	green	0.028	0.166	-0.107		0.254	1	1.579	0.213	0.087
	Smim12	brown	0.007	0.016	-0.102		0.404	1	1.342	0.267	0.279	0.306		1	1	24				Hmgcl	lightgreen	0.015	0.033	-0.138		0.067	1	0.532	0.557	0.634	0.545		1	1	0				Epha7	blue	0.028	0.166	0.179		0.085	1	2	0.122	0.164
	Mef2a	midnightblue	0.016	0.037	0.102		0.239	1	0.658	0.375	0.396	0.306		0.844	1	41				Fam184a	lightgreen	0.015	0.033	0.084		0.921	1	1.035	0.398	0.326	0.407		0.92	1	89				Pde4c	turquoise	0.028	0.168	-0.428		0.003	0.007	0.294	0.427	0.562
	Syn2	greenyellow	0.004	0.007	-0.092		0.709	1	1.14	0.245	0.245	0.309		1	1	16				Elovl6	blue	0.015	0.033	-0.07		0.48	1	0.785	0.088	0.23	0.054		0	0	214				Kdm2b	magenta	0.028	0.168	-0.149		0.418	1	1.382	0.169	0.133
	Fam171a1	red	0.016	0.039	0.081		0.206	1	1.565	0.39	0.462	0.311		0.001	0.012	70				Gnai3	blue	0.015	0.034	0.11		0.738	1	0.892	0.45	0.563	0.396		0.862	1	92				Ndst2	turquoise	0.028	0.169	-0.138		0.234	1	1.611	0.292	0.397
	Rasgef1a	red	0	0	0.15		0.287	1	1.457	0.116	0.024	0.315		0	0	188				Smyd5	yellow	0.015	0.034	-0.105		0.741	1	1.121	0.202	0.26	0.184		1	1	5				Kif1bp	black	0.028	0.17	0.059		0.653	1	1.196	0.595	0.483
	S1pr5	yellow	0	0	-0.381		0.26	1	0.67	0.243	0.107	0.317		0.998	1	29				Srpk3	yellow	0.015	0.034	-0.303		0.008	0.017	0.397	0.271	0.334	0.242		1	1	1				Gm16861	turquoise	0.028	0.17	-0.29		0.847	1	0.925	0.277	0.325
	Ank1	yellow	0.009	0.019	-0.197		0.662	1	1.166	0.359	0.275	0.319		1	1	4				Fam49a	blue	0.015	0.035	0.114		0.697	1	0.875	0.629	0.687	0.635		0	0	204				Pcnt	brown	0.028	0.17	-0.102		0.478	1	1.327	0.224	0.178
	Nt5c3b	brown	0.008	0.017	-0.114		0.432	1	0.757	0.219	0.24	0.323		0.989	1	33				Dock4	green	0.015	0.035	0.119		0.251	1	1.486	0.262	0.163	0.379		0.002	1	133				Lin52	purple	0.028	0.173	0.158		0.022	0.111	0.392	0.121	0.091
	Nexn	black	0	0.001	-0.478		0	0.001	0.274	0.543	0.655	0.323		1	1	7				Vezt	blue	0.016	0.036	0.069		0.919	1	1.036	0.438	0.67	0.32		1	1	18				Gps2	turquoise	0.029	0.178	-0.164		0.107	1	0.521	0.689	0.7
	Gmpr2	green	0.018	0.048	-0.082		0.582	1	0.822	0.163	0.096	0.324		0.043	1	60				Tmem68	blue	0.016	0.036	0.136		0.143	1	0.604	0.373	0.427	0.349		1	1	5				Stx16	turquoise	0.029	0.178	-0.115		0.497	1	0.761	0.532	0.547
	Car7	greenyellow	0.007	0.015	-0.278		0.176	1	0.617	0.14	0.134	0.325		0.805	1	42				Hmg20b	yellow	0.016	0.036	-0.186		0.125	1	0.59	0.394	0.421	0.377		1	1	10				Cdk5r1	green	0.029	0.178	0.088		0.246	1	1.591	0.466	0.446
	Pck2	tan	0.002	0.003	-0.183		0.331	1	0.708	0.353	0.343	0.327		1	1	4				5031439G07Rik	yellow	0.016	0.037	-0.142		0.06	1	0.523	0.507	0.416	0.765		1	1	11				Atmin	green	0.029	0.178	0.078		0.429	1	1.371	0.165	0.109
	Tmem87b	yellow	0.017	0.044	0.085		0.382	1	0.733	0.467	0.401	0.327		1	1	2				Dennd4b	yellow	0.016	0.037	-0.13		0.533	1	0.808	0.587	0.837	0.395		1	1	17				Ap1g2	turquoise	0.029	0.187	-0.375		0.129	1	0.541	0.783	0.848
	Tmem88b	yellow	0.001	0.002	-0.291		0.517	1	0.795	0.33	0.17	0.33		1	1	1				Nkrf	green	0.017	0.038	0.118		0.11	1	1.74	0.67	0.727	0.671		0	0.001	150				9530052E02Rik	green	0.03	0.192	-0.315		0.814	1	1.098	0.22	0.222
	Cacna1i	yellow	0	0	-0.392		0.879	1	0.947	0.453	0.431	0.331		1	1	7				Mapk9	lightgreen	0.017	0.038	0.073		0.089	1	1.802	0.796	0.893	0.585		0.49	1	103				Prpf40b	turquoise	0.107	1	-0.182		0.363	1	0.693	1	1
	Rasd2	black	0	0	-0.382		0.002	0.004	0.327	0.452	0.502	0.333		1	1	11				Eif3j1	turquoise	0.017	0.038	-0.147		0.365	1	0.733	0.122	0.203	0.113		1	1	45				Gramd1a	turquoise	0.078	1	-0.146		0.612	1	0.815	0.755	0.702
	Nip7	grey60	0.012	0.027	0.084		0.374	1	0.729	0.345	0.28	0.335		1	1	10				Impa1	turquoise	0.017	0.039	0.111		0.018	0.041	0.44	0.301	0.443	0.217		1	1	43				Pafah1b2	purple	0.545	1	0.022		0.386	1	1.414	1	0.937
	Myrf	yellow	0.013	0.028	-0.201		0.767	1	0.9	0.324	0.188	0.337		1	1	7				Il18	royalblue	0.017	0.039	-0.169		0.695	1	0.875	0.32	0.483	0.21		0.993	1	79				Myo9b	turquoise	0.19	1	-0.172		0.917	1	1.042	0.774	0.749
	Rgs16	yellow	0.003	0.004	-0.254		0.086	1	0.542	0.294	0.22	0.339		1	1	5				Zbtb38	blue	0.017	0.04	0.097		0.761	1	1.111	0.656	0.686	0.735		0.031	1	122				Plcg1	turquoise	0.182	1	-0.11		0.967	1	0.983	0.796	0.85
	Plp1	yellow	0.01	0.021	-0.29		0.301	1	0.693	0.311	0.182	0.339		1	1	6				Rims1	green	0.017	0.04	0.095		0.859	1	1.064	0.238	0.195	0.3		0	0.001	147				Sfswap	turquoise	0.263	1	-0.093		0.89	1	1.056	0.633	0.626
	Plpp2	midnightblue	0.004	0.007	-0.319		0.792	1	0.911	0.356	0.378	0.34		1	1	4				Etfrf1	turquoise	0.017	0.041	-0.134		0.005	0.01	0.378	0.249	0.372	0.203		1	1	29				Chkb	turquoise	0.069	1	-0.148		0.891	1	0.945	0.709	0.699
	Dchs2	yellow	0.001	0.003	0.284		0.351	1	1.391	0.248	0.133	0.342		1	1	21				Tnks	magenta	0.018	0.041	0.274		0	0	7.304	0.958	0.532	0.984		1	1	33				Srrm1	turquoise	0.1	1	-0.173		0.439	1	0.732	0.925	0.922
	Sms	red	0.001	0.002	-0.133		0.786	1	0.908	0.173	0.109	0.344		0	0	104				Ncoa4	magenta	0.018	0.041	0.176		0.001	0.002	3.134	0.575	0.211	0.727		0.947	1	87				Dnm2	turquoise	0.051	1	-0.163		0.395	1	0.71	0.869	0.864
	Adora1	greenyellow	0.007	0.014	-0.153		0.8	1	1.093	0.271	0.255	0.347		1	1	8				Man2a1	turquoise	0.018	0.041	0.114		0.279	1	0.69	0.153	0.153	0.238		1	1	4				Sbno2	turquoise	0.118	1	-0.201		0.475	1	0.75	0.918	0.924
	Skiv2l2	royalblue	0.017	0.045	0.085		0.758	1	1.114	0.34	0.421	0.347		0.004	1	67				Klhl28	magenta	0.017	0.041	0.258		0	0.001	3.59	0.422	0.157	0.514		1	1	61				Atg2a	turquoise	0.289	1	-0.089		0.197	1	0.594	0.862	0.937
	Chrd	greenyellow	0.002	0.004	-0.526		0.557	1	1.23	0.144	0.079	0.348		1	1	4				Otud6b	green	0.018	0.042	0.142		0.925	1	1.033	0.527	0.388	0.719		0.57	1	101				Pcyt2	turquoise	0.145	1	-0.127		0.737	1	0.873	0.802	0.819
	Fkbp1b	greenyellow	0.006	0.011	-0.186		0.942	1	0.974	0.209	0.138	0.348		1	1	5				Paqr9	midnightblue	0.018	0.042	0.108		0.021	0.05	2.233	0.524	0.343	0.643		0	0	182				Serinc3	greenyellow	0.687	1	0.015		0.826	1	0.915	0.822	0.657
	Gdi2	turquoise	0.001	0.001	0.116		0.419	1	0.75	0.127	0.125	0.351		1	1	25				Atp5f1	brown	0.018	0.044	-0.1		0.084	1	0.551	0.179	0.214	0.16		1	1	12				Kmt2b	turquoise	0.055	1	-0.17		0.085	1	0.497	0.882	0.931
	Ido1	black	0.004	0.007	-0.476		0.003	0.006	0.344	0.542	0.597	0.356		1	1	18				Dcaf4	turquoise	0.018	0.044	-0.092		0.041	0.137	0.493	0.107	0.18	0.07		0.884	1	91				Pkd1	turquoise	0.443	1	-0.095		0.987	1	0.992	0.765	0.855
	Gal3st1	yellow	0.011	0.023	-0.197		0.592	1	0.827	0.127	0.031	0.357		0	0	86				Rnf168	blue	0.018	0.045	0.09		0.311	1	0.706	0.663	0.61	0.799		0	0	201				Ssh3	turquoise	0.057	1	-0.291		0.236	1	0.62	0.969	0.984
	Eif3m	pink	0.009	0.02	-0.092		0.408	1	0.745	0.232	0.255	0.362		1	1	3				Atl1	green	0.018	0.045	0.089		0.891	1	0.955	0.43	0.317	0.597		1	1	34				Pja2	blue	0.353	1	0.051		0.231	1	1.616	1	0.96
	Adssl1	midnightblue	0.001	0.001	-0.237		0.4	1	0.741	0.452	0.479	0.363		1	1	7				Qpct	turquoise	0.018	0.045	-0.13		0.568	1	0.823	0.312	0.435	0.325		1	1	70				Mier2	turquoise	0.284	1	-0.096		0.655	1	0.835	0.732	0.747
	Cry1	yellow	0	0	0.192		0.528	1	0.799	0.603	0.646	0.363		1	1	7				Tenm1	magenta	0.018	0.045	0.207		0	0	4.59	0.598	0.248	0.693		0.49	1	103				Crtc2	turquoise	0.169	1	-0.13		0.509	1	0.767	0.839	0.888
	Tnc	greenyellow	0.001	0.002	-0.593		0.677	1	1.158	0.259	0.261	0.364		1	1	3				Tmem255a	lightgreen	0.018	0.045	0.196		0.687	1	1.149	0.479	0.416	0.397		1	1	6				Kcnt1	turquoise	0.253	1	-0.135		0.626	1	0.822	0.868	0.875
	Pcdh15	red	0.006	0.012	-0.195		0.011	0.024	2.474	0.19	0.052	0.368		0.975	1	35				Mgat5	midnightblue	0.018	0.045	0.11		0.304	1	1.426	0.558	0.599	0.545		0.999	1	73				Slc4a3	turquoise	0.186	1	-0.117		0.692	1	0.853	0.797	0.842
	Prosc	yellow	0.012	0.028	0.083		0.672	1	1.161	0.396	0.416	0.368		1	1	27				Spns2	pink	0.019	0.046	-0.147		0.524	1	0.804	0.339	0.409	0.304		1	1	12				Atp13a1	turquoise	0.386	1	-0.072		0.854	1	1.075	0.811	0.789
	Nkx6-2	yellow	0.002	0.004	-0.36		0.227	1	0.65	0.109	0.026	0.374		0.003	1	68				Tmem39b	blue	0.019	0.046	-0.124		0.647	1	0.855	0.186	0.208	0.199		1	1	1				Cabin1	turquoise	0.177	1	-0.122		0.564	1	0.793	0.751	0.751
	Tspan9	black	0.012	0.026	-0.167		0.458	1	0.768	0.273	0.211	0.374		1	1	27				Scube3	pink	0.019	0.046	-0.219		0.068	1	0.533	0.252	0.298	0.209		1	1	0				Rps6kb2	turquoise	0.08	1	-0.268		0.283	1	0.649	0.944	0.981
	Tma7	brown	0.004	0.007	-0.141		0.001	0.002	0.298	0.118	0.121	0.376		0.012	1	64				Stard3	purple	0.019	0.047	-0.1		0.333	1	0.718	0.507	0.616	0.472		1	1	24				Cand1	blue	0.57	1	0.023		0.986	1	1.006	0.86	0.903
	Camk1	midnightblue	0.001	0.002	-0.236		0.944	1	0.975	0.374	0.384	0.378		0.907	1	39				Prrg2	turquoise	0.019	0.047	-0.151		0.162	1	0.618	0.178	0.173	0.285		1	1	1				Dennd6b	turquoise	0.073	1	-0.198		0.485	1	0.755	0.789	0.784
	Trappc8	tan	0.011	0.022	0.082		0.046	1	2.037	0.323	0.181	0.379		1	1	21				Plxnc1	lightgreen	0.019	0.047	0.139		0.016	0.038	2.312	0.622	0.485	0.548		1	1	6				Gpbp1	black	0.63	1	0.023		0.804	1	1.103	0.795	0.738
	Elovl7	yellow	0.001	0.001	-0.263		0.213	1	0.642	0.224	0.089	0.381		1	1	14				Ywhab	green	0.019	0.048	0.072		0.66	1	0.861	0.43	0.713	0.278		1	1	13				Picalm	turquoise	0.858	1	-0.008		0.879	1	1.061	0.486	0.484
	Crhr1	yellow	0	0.001	-0.368		0.003	0.006	0.346	0.579	0.623	0.383		1	1	8				Atxn10	lightcyan	0.019	0.048	0.06		0.539	1	0.811	0.941	0.872	0.853		1	1	33				Cep164	turquoise	0.236	1	-0.141		0.645	1	0.831	0.846	0.912
	Rspo1	midnightblue	0.006	0.011	-0.395		0.252	1	0.665	0.405	0.422	0.384		0.949	1	37				Tm9sf4	magenta	0.019	0.048	0.09		0.048	0.213	1.988	0.249	0.183	0.34		0	0	308				Snrnp70	turquoise	0.041	1	-0.189		0.149	1	0.558	0.935	0.948
	Ptprv	black	0.007	0.016	-0.535		0	0	0.232	0.448	0.476	0.388		0.998	1	29				Rdh14	turquoise	0.02	0.049	-0.086		0.166	1	0.621	0.473	0.657	0.369		1	1	23				Szt2	turquoise	0.104	1	-0.208		0.35	1	0.686	0.876	0.905
	Snx27	blue	0.008	0.017	0.077		0.02	0.05	2.305	0.397	0.466	0.4		0.998	1	29				Gpr155	turquoise	0.02	0.049	0.082		0.022	0.054	0.452	0.367	0.463	0.313		0.999	1	72				Gm3764	turquoise	0.107	1	-0.212		0.432	1	0.729	0.743	0.808
	Akap9	yellow	0	0	0.196		0.296	1	1.447	0.604	0.644	0.403		1	1	12				Nudt21	magenta	0.02	0.049	0.188		0.023	0.058	2.213	0.347	0.122	0.542		0.003	1	132				L3mbtl1	turquoise	0.417	1	-0.122		0.288	1	0.652	0.889	0.902
	Lynx1	greenyellow	0	0	-0.269		0.821	1	1.083	0.175	0.12	0.407		1	1	5				Ptprd	black	0.02	0.049	-0.124		0.423	1	0.76	0.172	0.266	0.175		1	1	54				Jag2	turquoise	0.07	1	-0.2		0.099	1	0.512	0.716	0.82
	Scaper	tan	0.001	0.002	0.132		0.827	1	0.925	0.432	0.399	0.409		0.187	1	54				Lrba	magenta	0.02	0.049	0.101		0	0	4.598	0.702	0.257	0.83		0.025	1	123				Unk	turquoise	0.038	1	-0.159		0.415	1	0.72	0.756	0.77
	Ccdc6	yellow	0.001	0.001	0.133		0.025	0.084	2.226	0.518	0.738	0.409		1	1	18																							Ankrd13d	turquoise	0.111	1	-0.117		0.413	1	0.719	0.699	0.64
	Lgi3	yellow	0	0	-0.276		0.328	1	0.706	0.358	0.172	0.412		1	1	10																							Caprin1	blue	0.625	1	0.021		0.407	1	1.392	0.913	0.97
	Rprd1b	tan	0.017	0.046	0.074		0.245	1	1.508	0.229	0.077	0.413		0	0	142				Nr3c1	green	0.02	0.051	0.116		0.046	0.175	2	0.813	0.789	0.901		0	0	526				Agrn	turquoise	0.36	1	-0.097		0.795	1	0.9	0.753	0.811
	Mobp	yellow	0	0	-0.476		0.141	1	0.592	0.38	0.192	0.414		0.76	1	43				Pgrmc1	turquoise	0.021	0.052	0.083		0.98	1	1.009	0.433	0.431	0.651		1	1	18				Gpatch8	turquoise	0.152	1	-0.159		0.339	1	0.68	0.829	0.839
	Ccng1	purple	0.007	0.016	-0.146		0.093	1	0.548	0.329	0.362	0.421		1	1	5				Cpeb3	magenta	0.021	0.052	0.173		0	0	4.512	0.607	0.255	0.706		0.451	1	104				Pcnx3	turquoise	0.141	1	-0.123		0.28	1	0.647	0.561	0.673
	Krt73	greenyellow	0.005	0.009	0.675		0	0	6.477	0.275	0.33	0.422		1	1	3				Dcaf13	brown	0.021	0.052	0.129		0.315	1	1.414	0.207	0.378	0.266		0	0	168				Zfp692	turquoise	0.032	1	-0.267		0.436	1	0.731	0.676	0.682
	Tm2d1	pink	0.017	0.046	-0.098		0.498	1	1.27	0.259	0.267	0.428		0.544	1	47				Cdkal1	turquoise	0.021	0.053	-0.103		0.075	1	0.541	0.187	0.197	0.267		1	1	7				Zfr	blue	0.788	1	0.014		0.26	1	1.57	0.816	0.916
	Ifitm10	midnightblue	0	0	-0.307		0.043	1	0.484	0.45	0.426	0.428		1	1	4				Grwd1	purple	0.021	0.053	-0.081		0.682	1	1.152	0.317	0.32	0.408		1	1	3				Gabrb3	purple	0.661	1	0.019		0.795	1	1.108	0.786	0.752
	Arhgap1	lightyellow	0	0.001	0.131		0.9	1	0.956	0.566	0.402	0.43		1	1	10				Prdx5	salmon	0.021	0.053	-0.108		0.873	1	1.057	0.637	0.885	0.537		1	1	2				Mroh1	turquoise	0.312	1	-0.092		0.513	1	0.769	0.666	0.634
	Sstr3	greenyellow	0.009	0.017	-0.303		0.94	1	0.973	0.253	0.155	0.432		1	1	8				Zfyve16	black	0.021	0.054	0.131		0.141	1	0.603	0.216	0.193	0.304		1	1	12				Cdk10	turquoise	0.244	1	-0.089		0.951	1	0.975	0.557	0.511
	Plekhb1	yellow	0.004	0.007	-0.181		0.663	1	0.857	0.445	0.295	0.435		1	1	13				Tollip	midnightblue	0.021	0.054	0.057		0.517	1	1.25	0.42	0.232	0.65		1	1	57				Dnajc6	green	0.644	1	0.03		0.149	1	1.786	1	1
	Rab3gap2	yellow	0	0.001	0.121		0.065	1	1.93	0.447	0.29	0.438		1	1	3				Crebl2	lightgreen	0.022	0.057	0.098		0.104	1	1.757	0.857	0.739	0.76		0.92	1	89				Edc4	turquoise	0.249	1	-0.08		0.832	1	1.087	0.616	0.507
	Slc7a3	midnightblue	0.007	0.015	-0.262		0.005	0.01	0.365	0.402	0.414	0.44		1	1	7				Synrg	magenta	0.022	0.059	0.088		0.007	0.014	2.558	0.366	0.142	0.506		0.988	1	81				Speg	turquoise	0.125	1	-0.128		0.189	1	0.588	0.806	0.861
	Adarb2	yellow	0	0	-0.342		0.613	1	0.836	0.464	0.328	0.44		1	1	9				Tspyl4	green	0.022	0.06	0.091		0.381	1	1.352	0.622	0.673	0.607		1	1	24				Polrmt	turquoise	0.156	1	-0.116		0.344	1	0.683	0.692	0.676
	Mbp	yellow	0.001	0.001	-0.304		0.337	1	0.711	0.469	0.272	0.447		1	1	10				Cep70	turquoise	0.022	0.06	-0.122		0.209	1	0.65	0.344	0.449	0.317		1	1	26				Crbn	purple	0.967	1	-0.002		0.748	1	1.136	0.858	0.876
	Chst15	black	0	0	-0.223		0.165	1	0.61	0.274	0.202	0.448		0.544	1	47				Sstr4	magenta	0.022	0.06	0.459		0	0	4.913	0.522	0.26	0.586		0	1	140				Snapc4	turquoise	0.046	1	-0.29		0.127	1	0.54	0.933	0.927
	Camk2b	yellow	0	0.001	-0.159		0.07	1	0.523	0.585	0.532	0.449		1	1	11				Eif2a	brown	0.022	0.061	-0.087		0.019	0.045	0.444	0.745	0.786	0.741		0.997	1	76				Flna	turquoise	0.096	1	-0.214		0.898	1	1.052	0.69	0.61
	Rnd1	midnightblue	0.002	0.003	-0.312		0.03	0.135	0.46	0.211	0.116	0.454		1	1	21				Ptprt	green	0.022	0.061	0.114		0.219	1	1.529	0.55	0.468	0.663		0	0.003	144				Akap11	blue	0.426	1	0.037		0.174	1	1.724	0.915	0.955
	Hdac4	yellow	0.004	0.007	0.107		0.962	1	1.016	0.666	0.761	0.454		1	1	17				Tbc1d2b	yellow	0.022	0.061	-0.103		0.078	1	0.545	0.149	0.164	0.156		1	1	2				Mybbp1a	turquoise	0.117	1	-0.121		0.342	1	0.682	0.693	0.741
	Atxn7l1	yellow	0.001	0.002	0.127		0.156	1	1.653	0.433	0.263	0.46		1	1	3				R3hcc1	purple	0.022	0.061	-0.108		0.022	0.057	0.453	0.248	0.254	0.306		1	1	3				Trmt2a	turquoise	0.251	1	-0.079		0.913	1	1.043	0.598	0.626
	Bbx	tan	0.003	0.005	0.131		0.255	1	1.496	0.559	0.506	0.461		1	1	11				Eif3m	brown	0.023	0.062	-0.079		0.135	1	0.598	0.407	0.486	0.36		1	1	17				Azin1	blue	0.486	1	0.036		0.458	1	1.345	0.932	0.891
	Doc2b	black	0	0.001	-0.238		0.997	1	0.998	0.212	0.131	0.463		0	0	94				Ablim2	lightgreen	0.023	0.062	-0.1		0.902	1	1.044	0.84	0.829	0.649		0.973	1	84				Wdr82	purple	0.613	1	0.014		0.459	1	1.344	0.9	0.847
	Rgl1	red	0.018	0.049	0.094		0.906	1	1.042	0.578	0.66	0.463		1	1	10				Alkbh5	midnightblue	0.023	0.062	0.097		0.003	0.005	2.874	0.458	0.234	0.605		0.92	1	89				Miat	turquoise	0.058	1	-0.343		0.097	1	0.51	0.903	0.955
	Mag	yellow	0.001	0.001	-0.305		0.377	1	0.73	0.455	0.246	0.464		1	1	3				Usp15	blue	0.023	0.062	0.113		0.275	1	1.457	0.167	0.145	0.257		0	0	530				Bmpr2	blue	0.406	1	0.052		0.099	1	1.942	0.98	0.882
	Nefm	yellow	0	0	-0.395		0.009	0.019	0.39	0.568	0.516	0.464		1	1	4				Lin52	pink	0.023	0.062	0.142		0.019	0.045	0.444	0.154	0.181	0.141		1	1	4				Arrdc1	turquoise	0.158	1	-0.158		0.819	1	0.912	0.552	0.474
	Cacng2	yellow	0.012	0.027	-0.119		0.707	1	0.875	0.589	0.607	0.465		1	1	19				Alg2	lightgreen	0.023	0.063	0.083		0.83	1	1.077	0.54	0.571	0.418		1	1	3				Usp47	purple	0.901	1	0.004		0.461	1	1.342	0.773	0.843
	Ankfn1	blue	0.011	0.023	0.42		0.015	0.034	2.398	0.515	0.611	0.466		1	1	6				Morc3	greenyellow	0.023	0.063	-0.098		0.098	1	0.565	0.281	0.42	0.181		1	1	43				Prkacb	blue	0.184	1	0.072		0.026	1	2.462	0.933	0.888
	Zcrb1	blue	0.016	0.04	-0.117		0.053	1	1.994	0.384	0.27	0.471		0.001	0.006	71				Lrrc58	green	0.023	0.064	0.137		0.724	1	1.129	0.617	0.564	0.69		0	0	181				Arcn1	blue	0.46	1	0.028		0.502	1	1.307	0.794	0.795
	Htr1a	midnightblue	0.006	0.013	-0.232		0.2	1	0.634	0.484	0.457	0.471		1	1	25				Wdr54	blue	0.023	0.064	-0.115		0.143	1	0.604	0.166	0.12	0.303		1	1	10				Gtpbp2	turquoise	0.132	1	-0.14		0.416	1	0.721	0.852	0.876
	Phlda3	midnightblue	0.004	0.006	-0.257		0.379	1	0.732	0.689	0.792	0.471		1	1	3				Inafm2	green	0.023	0.068	0.081		0.984	1	0.994	0.443	0.684	0.319		0	0	213				Dgat1	blue	0.125	1	-0.12		0.911	1	1.045	0.829	0.916
	Ccdc136	midnightblue	0.011	0.024	-0.154		0.423	1	0.752	0.379	0.306	0.472		1	1	10				Gbe1	lightgreen	0.023	0.068	0.13		0.258	1	1.477	0.569	0.381	0.574		0	0	207				Pdpk1	blue	0.26	1	0.056		0.187	1	1.696	0.933	0.937
	Minos1	brown	0.008	0.017	-0.1		0.346	1	1.396	0.273	0.186	0.474		1	1	27				Rnf166	blue	0.023	0.068	-0.079		0.272	1	0.686	0.177	0.119	0.366		1	1	26				Nbr1	blue	0.45	1	0.025		0.325	1	1.482	0.779	0.684
	Inf2	black	0.001	0.001	-0.327		0	0.001	0.267	0.644	0.748	0.479		0.993	1	32				Gipr	yellow	0.024	0.069	-0.328		0.037	0.112	0.486	0.543	0.54	0.602		1	1	2				Rnf112	turquoise	0.357	1	-0.093		0.356	1	0.69	0.798	0.803
	Fgd4	tan	0.01	0.021	0.158		0.72	1	1.134	0.629	0.67	0.481		0.009	1	65				Rnf170	brown	0.024	0.069	-0.074		0.066	1	0.53	0.195	0.294	0.104		0	0	337				Ubr7	black	0.468	1	0.023		0.521	1	0.772	0.853	0.878
	Cxadr	salmon	0	0.001	-0.24		0	0.001	0.276	0.183	0.28	0.491		0.76	1	43				Nucb2	brown	0.024	0.069	-0.096		0.567	1	0.822	0.148	0.351	0.06		0	0	1149				Vps35	blue	0.614	1	0.028		0.641	1	1.204	0.846	0.889
	Cmtr2	yellow	0.001	0.002	0.16		0.344	1	1.397	0.579	0.526	0.497		1	1	17				L3mbtl2	black	0.024	0.071	-0.077		0.12	1	0.585	0.242	0.35	0.164		0	0	246				Lrp1	magenta	0.415	1	-0.056		0.95	1	0.974	0.936	0.913
	Mog	yellow	0.002	0.004	-0.295		0.341	1	0.713	0.421	0.206	0.498		1	1	15				Slc35a5	blue	0.025	0.072	0.11		0.562	1	0.82	0.69	0.734	0.682		0.302	1	108				Pagr1a	turquoise	0.384	1	-0.093		0.997	1	0.997	0.692	0.744
	Vmp1	yellow	0.004	0.006	0.118		0.039	1	0.478	0.541	0.436	0.502		1	1	1				Rad23b	green	0.025	0.072	0.088		0.758	1	1.112	0.767	0.87	0.711		0	0	245				Cluh	turquoise	0.241	1	-0.071		0.194	1	0.592	0.529	0.507
	Tsr1	tan	0.005	0.008	0.155		0.858	1	1.065	0.344	0.195	0.503		0	0	88				Nampt	turquoise	0.025	0.072	-0.095		0.318	1	0.71	0.328	0.651	0.155		0	0	399				Usp19	turquoise	0.269	1	-0.071		0.36	1	0.692	0.632	0.643
	Ahcyl2	tan	0.013	0.031	0.092		0.13	1	1.712	0.576	0.489	0.516		1	1	11				Lrfn5	lightgreen	0.025	0.072	0.114		0.189	1	1.574	1	0.814	0.897		0	0	190				Matk	turquoise	0.388	1	-0.072		0.363	1	0.693	0.659	0.703
	Bcl2	yellow	0.003	0.006	0.145		0.094	1	1.813	0.647	0.569	0.518		1	1	2				Scn2a	green	0.025	0.072	0.111		0.078	1	1.841	0.439	0.57	0.394		0	0	563				Iqce	turquoise	0.138	1	-0.162		0.962	1	1.018	0.727	0.775
	Dnajc27	blue	0.012	0.027	0.114		0.224	1	0.649	0.077	0.012	0.52		0	0	567				BC003965	greenyellow	0.025	0.072	-0.062		0.475	1	0.783	0.445	0.627	0.329		0	0	682				Ell	turquoise	0.106	1	-0.116		0.563	1	0.792	0.804	0.867
	Wdr46	purple	0.015	0.036	0.138		0.33	1	1.411	0.385	0.257	0.52		0.878	1	40				Vsig10l	pink	0.025	0.072	-0.244		0.152	1	0.611	0.202	0.291	0.128		1	1	22				Atad1	black	0.405	1	0.046		0.934	1	0.966	0.764	0.671
	Setbp1	tan	0.009	0.019	0.128		0.907	1	0.959	0.432	0.248	0.525		0.93	1	38				Smg8	midnightblue	0.025	0.072	0.078		0.02	0.046	2.254	0.358	0.131	0.589		0	0	224				Slc25a28	turquoise	0.127	1	-0.119		0.245	1	0.626	0.73	0.761
	Ube4a	tan	0.004	0.006	0.098		0.916	1	0.963	0.511	0.421	0.526		0.964	1	36				Borcs8	salmon	0.024	0.072	-0.121		0.26	1	1.475	0.37	0.485	0.362		1	1	0				Clcn3	purple	0.229	1	0.049		0.043	1	2.268	0.842	0.739
	Heatr5b	blue	0.004	0.007	0.144		0.224	1	1.537	0.319	0.135	0.536		0.002	1	69				Wdr82	yellow	0.025	0.073	0.054		0.744	1	0.895	0.502	0.545	0.49		0.005	1	130				Rgs11	turquoise	0.105	1	-0.274		0.241	1	0.623	0.819	0.77
	Cpd	yellow	0	0	0.248		0.213	1	0.642	0.761	0.791	0.536		1	1	23				Cntln	black	0.025	0.073	0.131		0.132	1	0.595	0.429	0.461	0.435		1	1	10				Pitpnm1	turquoise	0.172	1	-0.092		0.187	1	0.587	0.646	0.747
	Phactr1	black	0.014	0.032	-0.088		0.58	1	0.822	0.67	0.763	0.538		0.602	1	46				Arap2	blue	0.025	0.073	0.147		0.041	0.137	0.493	0.266	0.385	0.179		0	0	240				Unc13a	turquoise	0.305	1	-0.082		0.211	1	0.603	0.67	0.733
	Cldn11	yellow	0.004	0.007	-0.276		0.438	1	0.759	0.423	0.203	0.542		1	1	18				Vipr1	yellow	0.025	0.073	-0.167		0.603	1	0.837	0.42	0.501	0.368		1	1	2				Yme1l1	purple	0.591	1	0.028		0.592	1	1.238	0.906	0.905
	Ncoa4	blue	0.017	0.045	0.181		0.412	1	1.336	0.444	0.441	0.543		0	0	242				Shroom1	yellow	0.026	0.073	-0.192		0.998	1	1.002	0.301	0.399	0.24		1	1	7				Cul1	black	0.427	1	0.025		0.697	1	1.167	0.737	0.693
	Lhfpl5	midnightblue	0.001	0.001	-0.305		0.024	0.072	0.443	0.785	0.972	0.543		0.024	1	62				4933434E20Rik	greenyellow	0.025	0.073	-0.067		0.816	1	1.084	0.36	0.59	0.251		0	0	513				Trim44	green	0.863	1	0.007		0.492	1	1.315	0.874	0.88
	Ndrg1	yellow	0.017	0.044	-0.178		0.754	1	0.895	0.404	0.204	0.544		1	1	24				1810043G02Rik	turquoise	0.025	0.073	0.097		0.552	1	0.816	0.14	0.423	0.058		0	0	1044				Pura	blue	0.406	1	0.041		0.08	1	2.023	0.963	0.995
	Nr3c2	tan	0.007	0.015	0.135		0.664	1	1.165	0.597	0.547	0.544		0.003	1	68				Epb41	lightyellow	0.025	0.073	-0.171		0.554	1	1.226	0.43	0.417	0.451		1	1	1				Ppp2ca	greenyellow	0.458	1	0.025		0.968	1	1.015	1	0.968
	Luzp1	purple	0.019	0.049	-0.101		0.021	0.055	2.285	0.405	0.243	0.55		0	0	150				Nhlrc2	magenta	0.026	0.074	0.137		0	0	4.464	0.323	0.06	0.432		0.001	1	137				Abcc10	turquoise	0.214	1	-0.154		0.431	1	0.728	0.728	0.71
	5730455P16Rik	tan	0.017	0.046	0.138		0.439	1	1.314	0.297	0.123	0.553		0	0	135				Tmem33	blue	0.026	0.079	0.105		0.212	1	0.651	0.588	0.68	0.511		0	0	240				Adamts10	turquoise	0.08	1	-0.285		0.431	1	0.729	0.867	0.92
	Klhl13	purple	0.015	0.034	-0.149		0.582	1	1.214	0.506	0.444	0.556		0.074	1	58				Sparcl1	green	0.026	0.079	0.099		0.674	1	1.156	0.434	0.511	0.395		0.001	1	136				Wdr90	turquoise	0.142	1	-0.212		0.563	1	0.792	0.831	0.849
	Fxyd6	midnightblue	0.005	0.009	-0.207		0.123	1	0.576	0.689	0.721	0.556		1	1	10				Lor	purple	0.026	0.079	-0.191		0.559	1	0.819	0.285	0.224	0.473		1	1	52				Eif1ax	purple	0.353	1	0.049		0.106	1	1.916	0.92	1
	Tacc1	cyan	0.001	0.002	0.089		0.017	0.041	2.348	0.372	0.218	0.557		0.997	1	30				Lpgat1	green	0.026	0.08	0.093		0.282	1	1.449	0.653	0.563	0.745		0	1	142				Cxxc1	turquoise	0.346	1	-0.067		0.347	1	0.684	0.673	0.673
	Scn4b	black	0	0	-0.653		0	0.001	0.262	0.677	0.754	0.558		1	1	14				Pds5b	blue	0.026	0.08	0.095		0.275	1	0.688	0.345	0.533	0.207		1	1	57				Avl9	blue	0.559	1	0.03		0.138	1	1.815	0.89	0.825
	Slc6a7	greenyellow	0.007	0.016	-0.227		0.178	1	1.612	0.438	0.357	0.574		1	1	8				Rwdd1	brown	0.026	0.08	-0.079		0.011	0.025	0.414	0.305	0.442	0.16		0	0	370				Ciz1	turquoise	0.084	1	-0.18		0.07	1	0.479	0.729	0.768
	Kcnc4	midnightblue	0.001	0.002	-0.329		0.056	1	0.505	0.725	0.802	0.587		1	1	9				Egfl7	blue	0.026	0.08	-0.176		0.837	1	1.074	0.23	0.271	0.258		1	1	7				Cacna1d	turquoise	0.28	1	-0.089		0.518	1	0.771	0.686	0.684
	Sep4	yellow	0.009	0.018	-0.152		0.951	1	0.978	0.528	0.35	0.596		1	1	9				Pick1	pink	0.027	0.083	-0.09		0.049	0.224	0.506	0.417	0.427	0.431		1	1	5				Pan2	purple	0.317	1	-0.09		0.963	1	0.98	0.717	0.781
	Epb41l3	purple	0.015	0.033	-0.087		0.32	1	0.702	0.515	0.523	0.608		1	1	14				Atp1b1	green	0.027	0.084	0.08		0.228	1	1.515	0.663	0.73	0.638		0.999	1	72				Mthfr	turquoise	0.112	1	-0.15		0.191	1	0.59	0.707	0.699
	Ldlr	midnightblue	0.003	0.005	-0.26		0.429	1	0.755	0.283	0.139	0.609		1	1	8				Sez6	black	0.027	0.084	-0.111		0.075	1	0.541	0.591	0.637	0.564		1	1	4				Cdk9	turquoise	0.035	1	-0.161		0.822	1	1.093	0.637	0.756
	Cnp	yellow	0.002	0.003	-0.234		0.042	1	0.483	0.41	0.204	0.612		1	1	12				Acvr2a	purple	0.027	0.084	0.123		0.958	1	0.983	0.409	0.405	0.474		1	1	12				Adgrb2	magenta	0.228	1	-0.097		0.212	1	0.604	1	1
	Adra2c	black	0.008	0.017	-0.206		0.793	1	0.911	0.685	0.719	0.613		1	1	24				Phlpp1	magenta	0.027	0.084	0.074		0.002	0.003	2.984	0.449	0.169	0.565		1	1	36				Taok1	purple	0.762	1	-0.014		0.186	1	1.699	0.895	0.865
	Reln	yellow	0.001	0.001	-0.415		0.035	0.184	0.469	0.581	0.479	0.615		1	1	24				Cadm1	purple	0.028	0.086	0.105		0.526	1	1.244	0.35	0.337	0.455		1	1	27				Usp36	turquoise	0.153	1	-0.113		0.316	1	0.667	0.661	0.673
	Atp13a3	tan	0.007	0.015	0.137		0.19	1	1.591	0.75	0.743	0.63		0.711	1	44				Sept10	turquoise	0.028	0.086	0.156		0.634	1	0.85	0.24	0.339	0.216		1	1	59				Fnbp1	turquoise	0.071	1	-0.131		0.226	1	0.614	0.766	0.766
	Ski	red	0.006	0.013	0.113		0.082	1	1.857	0.514	0.293	0.639		0.373	1	50				Kctd4	turquoise	0.028	0.09	-0.168		0.303	1	0.703	0.118	0.219	0.066		1	1	22				Ankzf1	purple	0.072	1	-0.169		0.802	1	1.104	0.784	0.889
	Ncbp1	yellow	0.009	0.019	0.069		0.9	1	1.045	0.493	0.243	0.642		1	1	1				Zbtb7b	black	0.028	0.091	-0.128		0.037	0.11	0.486	0.19	0.287	0.109		1	1	11				Grip2	turquoise	0.378	1	-0.101		0.499	1	0.762	0.802	0.855
	Frem1	greenyellow	0.007	0.016	0.551		0	0	4.122	0.514	0.659	0.644		1	1	12				Ankrd12	blue	0.029	0.093	0.094		0.717	1	0.883	0.686	0.818	0.593		0	0	483				Cul2	black	0.554	1	0.021		0.977	1	0.988	0.932	0.843
	Cib2	midnightblue	0	0	-0.286		0.044	1	0.486	0.811	0.88	0.664		1	1	11				Klhl24	green	0.029	0.093	0.106		0.066	1	1.891	0.674	0.699	0.706		0	0	193				Smc1a	black	0.75	1	0.011		0.799	1	0.902	0.772	0.761
	Neto2	purple	0.015	0.035	-0.147		0.675	1	0.862	0.459	0.317	0.668		0.486	1	48				Ankrd24	yellow	0.029	0.093	-0.21		0.14	1	0.602	0.758	0.786	0.731		1	1	12				Cops2	greenyellow	0.848	1	0.01		0.463	1	1.341	0.845	0.768
	Ankrd33b	black	0.015	0.035	-0.226		0.616	1	0.837	0.674	0.662	0.676		1	1	22				Tlr3	blue	0.029	0.094	0.276		0.366	1	0.733	0.147	0.231	0.1		1	1	2				Taf1c	turquoise	0.191	1	-0.132		0.404	1	0.715	0.69	0.716
	Pmepa1	black	0.012	0.026	-0.18		0.116	1	0.571	0.592	0.506	0.677		0.711	1	44				Pcdhgc4	magenta	0.029	0.094	0.351		0	0	4.754	0.658	0.317	0.729		0	0	345				Tmem106b	blue	0.313	1	0.054		0.127	1	1.846	0.864	0.909
	Bsg	green	0.004	0.007	-0.095		0.301	1	1.442	0.546	0.433	0.682		0.001	0.004	72				Ap4s1	brown	0.029	0.1	-0.095		0.02	0.046	0.445	0.24	0.224	0.345		1	1	2				Adgrb1	turquoise	0.17	1	-0.141		0.076	1	0.487	0.678	0.717
	Pde1b	black	0.004	0.007	-0.157		0.107	1	0.563	0.771	0.76	0.684		1	1	18				Rab21	blue	0.03	0.102	0.073		0.272	1	0.686	0.431	0.491	0.394		0	0	198				Zdhhc1	purple	0.314	1	-0.081		0.536	1	0.779	0.679	0.697
	Foxo1	yellow	0	0	0.255		0.465	1	0.772	0.747	0.703	0.69		0.93	1	38				Sdc3	royalblue	0.03	0.102	0.103		0.938	1	1.027	0.862	0.86	0.846		0.999	1	74				Cntrob	turquoise	0.084	1	-0.171		0.252	1	0.63	0.788	0.795
	Ankrd35	midnightblue	0	0	-0.335		0.616	1	1.194	0.474	0.324	0.714		1	1	5				Prg4	brown	0.03	0.102	-0.206		0.611	1	0.84	0.277	0.448	0.195		0.374	1	106				Emc7	black	0.405	1	0.027		0.741	1	1.14	1	1
	Depdc5	yellow	0.003	0.005	0.169		0.094	1	1.812	0.515	0.216	0.738		1	1	17				Inpp4b	lightgreen	0.03	0.102	0.169		0.008	0.015	2.54	0.74	0.545	0.715		1	1	31				Cpsf2	blue	0.408	1	0.034		0.586	1	1.242	0.824	0.841
	Cntn2	yellow	0	0	-0.275		0.879	1	1.054	0.764	0.488	0.739		1	1	1				D630003M21Rik	turquoise	0.03	0.102	0.151		0.583	1	0.829	0.094	0.238	0.047		0.057	1	119				Dld	black	0.248	1	0.052		0.374	1	1.427	0.73	0.634
	Pcsk6	yellow	0.001	0.001	0.237		0.939	1	1.027	0.771	0.49	0.747		1	1	5				Zfp758	blue	0.03	0.103	0.209		0.887	1	0.953	0.346	0.393	0.351		0	0	174				Eif4g2	blue	0.344	1	0.041		0.253	1	1.581	0.827	0.813
	Chrna4	greenyellow	0.005	0.009	-0.293		0.181	1	1.606	0.445	0.259	0.757		1	1	5				Cep83	black	0.03	0.103	0.086		0.967	1	1.015	0.385	0.594	0.264		0	0	630				Api5	black	0.138	1	0.064		0.261	1	1.568	0.771	0.641
	Gucy1a3	black	0.015	0.036	-0.227		0.04	1	0.478	0.88	0.886	0.76		0.805	1	42				Med30	black	0.03	0.103	0.13		0.387	1	1.347	0.134	0.208	0.126		1	1	35				Wdr7	blue	0.591	1	0.022		0.276	1	1.547	0.862	0.935
	Col25a1	midnightblue	0.007	0.016	-0.205		0.819	1	1.083	0.858	0.938	0.765		0.805	1	42				Thap2	magenta	0.03	0.105	0.156		0.001	0.002	3.236	0.29	0.059	0.415		0.783	1	95				Tspoap1	turquoise	0.087	1	-0.186		0.024	0.165	0.398	0.779	0.796
	Susd2	midnightblue	0.001	0.001	-0.399		0.294	1	0.689	0.732	0.673	0.777		1	1	15				Zfp110	turquoise	0.03	0.107	0.086		0.591	1	0.832	0.195	0.467	0.074		0.01	1	127				Rabep1	purple	0.937	1	-0.003		0.774	1	0.891	0.829	0.882
	Rbm24	yellow	0.002	0.004	0.15		0.595	1	1.206	0.915	0.709	0.786		1	1	9				Ppp2r3d	black	0.031	0.108	-0.15		0.098	1	0.565	0.516	0.711	0.344		0.57	1	101				Ptger1	turquoise	0.071	1	-0.211		0.111	1	0.525	0.777	0.765
	Dock10	yellow	0.01	0.021	0.164		0.383	1	1.361	0.916	0.701	0.796		1	1	6				Scaper	green	0.03	0.108	0.086		0.878	1	0.949	0.474	0.454	0.527		0	0	215				Scmh1	turquoise	0.053	1	-0.129		0.704	1	0.858	0.689	0.69
	Fbxw8	lightyellow	0.017	0.047	0.122		0.114	1	1.753	0.853	0.565	0.816		1	1	15				Pigs	red	0.031	0.109	-0.108		0.102	1	0.57	0.495	0.62	0.611		0	0	358				Immt	black	0.993	1	0		0.66	1	0.837	0.826	0.75
	Prkra	midnightblue	0	0	-0.246		0.606	1	0.833	0.547	0.37	0.832		1	1	3				Smc2	turquoise	0.031	0.111	0.141		0.907	1	0.961	0.356	0.427	0.425		1	1	33				Stx7	greenyellow	0.59	1	0.023		0.305	1	1.507	0.868	0.907
	Smurf2	tan	0.006	0.012	0.095		0.747	1	1.12	0.778	0.577	0.835		0.227	1	53				Gskip	lightcyan	0.031	0.111	0.066		0.539	1	0.81	0.569	0.543	0.482		1	1	35				Kif21b	turquoise	0.076	1	-0.151		0.184	1	0.584	0.603	0.842
	Prkcd	yellow	0.002	0.003	0.256		0.168	1	1.63	1	0.986	0.845		1	1	24				Ankrd34b	blue	0.031	0.114	0.114		0.583	1	0.829	0.429	0.43	0.479		1	1	56				Slc9a6	blue	0.481	1	0.031		0.306	1	1.505	0.704	0.752
	Arpp19	black	0.011	0.023	-0.157		0.123	1	0.577	0.95	0.915	0.855		1	1	14				Glce	green	0.031	0.114	0.098		0.205	1	1.548	0.536	0.597	0.53		0.995	1	78				Agtpbp1	purple	0.273	1	0.036		0.137	1	1.817	0.801	0.743
	Rap1gap	yellow	0.015	0.033	0.181		0.276	1	1.469	0.933	0.743	0.897		1	1	8				Erc2	blue	0.032	0.115	0.109		0.042	0.153	2.027	0.305	0.431	0.354		1	1	9				Dhx15	purple	0.785	1	0.011		0.535	1	1.281	0.774	0.658
	Braf	tan	0.012	0.026	0.098		0.66	1	0.855	1	1	0.914		1	1	20				Baalc	magenta	0.032	0.115	0.19		0.001	0.001	3.281	0.648	0.406	0.726		0.838	1	93				Tomm70a	blue	0.464	1	0.048		0.767	1	1.125	0.834	0.974
	Spg21	yellow	0	0	0.184		0.607	1	0.833	0.968	0.641	1		1	1	11				Slc35c2	blue	0.032	0.119	-0.078		0.278	1	0.689	0.243	0.229	0.31		1	1	2				Kpna1	blue	0.413	1	0.04		0.224	1	1.627	0.905	0.956
																				Ipo7	magenta	0.032	0.121	0.187		0	0	4.941	0.995	0.728	1		1	1	40				Zfp335	turquoise	0.068	1	-0.238		0.071	1	0.481	0.615	0.719
																				Leng9	purple	0.032	0.122	-0.112		0.9	1	0.958	0.236	0.336	0.202		1	1	54				Pkn1	turquoise	0.238	1	-0.124		0.736	1	0.873	0.574	0.636
																				Aars2	pink	0.032	0.123	-0.135		0.118	1	0.584	0.751	0.943	0.533		1	1	25				Rtn3	black	0.116	1	0.05		0.657	1	1.193	0.905	0.86
	Mtr	blue	0.019	0.052	0.255		0.608	1	1.198	0.247	0.214	0.317		0.844	1	41				Elmod1	turquoise	0.032	0.123	-0.101		0.003	0.006	0.356	0.589	0.694	0.65		1	1	6				Map2k4	black	0.444	1	0.025		0.183	1	1.705	0.781	0.768
	Gm5898	red	0.019	0.053	0.358		0.599	1	0.83	0.065	0.021	0.216		0	0	166				Azi2	brown	0.032	0.123	-0.079		0.093	1	0.561	0.673	0.898	0.418		1	1	71				Myo5a	blue	0.242	1	0.06		0.055	1	2.171	0.876	0.928
	Purg	lightyellow	0.019	0.053	-0.118		0.535	1	1.245	0.454	0.161	0.73		1	1	17				Xkr4	magenta	0.032	0.123	0.25		0	0	7.974	0.669	0.171	0.765		0.001	1	134				Rrnad1	turquoise	0.059	1	-0.181		0.17	1	0.574	0.78	0.847
	Tmcc3	tan	0.019	0.054	0.118		0.255	1	1.496	0.261	0.27	0.17		1	1	1				Slc16a4	turquoise	0.032	0.123	-0.145		0.308	1	0.705	0.16	0.176	0.215		1	1	5				Eif2s2	greenyellow	0.714	1	0.015		0.524	1	1.289	0.885	0.838
	Sema3c	midnightblue	0.019	0.054	-0.212		0.468	1	0.773	0.508	0.467	0.535		1	1	8				Smc3	blue	0.033	0.125	0.076		0.777	1	0.908	0.587	0.675	0.547		0	0	155				Celsr3	turquoise	0.05	1	-0.252		0.057	1	0.461	0.918	0.927
	Mgat3	purple	0.019	0.055	-0.095		0.122	1	1.73	0.143	0.027	0.359		0	0	197				Wdr43	purple	0.033	0.125	-0.082		0.007	0.013	0.39	0.168	0.371	0.083		1	1	58				Npr2	turquoise	0.538	1	-0.052		0.774	1	0.89	0.668	0.662
	Ebp	brown	0.019	0.056	-0.125		0.865	1	1.061	0.038	0.117	0.019		1	1	3				Rnf180	midnightblue	0.033	0.131	0.168		0.328	1	1.401	0.336	0.127	0.598		1	1	43				Tcf3	turquoise	0.05	1	-0.148		0.319	1	0.669	0.732	0.755
	Xpnpep3	blue	0.019	0.058	0.158		0.1	1	1.792	0.32	0.458	0.269		1	1	15				Usp31	green	0.033	0.132	0.088		0.09	1	1.797	0.751	0.735	0.804		0	0	434				Rab2a	purple	0.696	1	0.016		0.304	1	1.508	0.852	0.91
	Chrm3	midnightblue	0.019	0.059	-0.313		0.038	1	0.475	0.878	0.954	0.75		1	1	5				Naf1	grey60	0.033	0.134	0.112		0.497	1	1.263	0.344	0.301	0.512		1	1	2				Eps15l1	purple	0.366	1	-0.055		0.655	1	1.195	0.712	0.862
	Kcnq3	brown	0.019	0.059	-0.116		0.257	1	0.668	0.062	0.08	0.143		0.998	1	29				Gpx8	brown	0.033	0.134	0.177		0.401	1	0.75	0.127	0.272	0.092		0.996	1	77				Kpna3	blue	0.913	1	0.006		0.534	1	1.282	0.843	0.879
	Isl1	midnightblue	0.02	0.06	-0.265		0.082	1	0.537	0.603	0.852	0.34		1	1	19				Zfp598	yellow	0.034	0.137	-0.159		0.129	1	0.593	0.798	0.864	0.721		1	1	4				Arhgef1	turquoise	0.038	1	-0.338		0.058	1	0.462	0.935	0.953
	Vps39	yellow	0.02	0.06	0.063		0.636	1	1.181	0.386	0.175	0.55		0.997	1	30				Plekhm3	magenta	0.033	0.137	0.066		0.005	0.009	2.691	0.417	0.08	0.694		0	0	250				Stx12	black	0.626	1	-0.02		0.996	1	1.001	0.812	0.809
	S100a10	greenyellow	0.02	0.06	-0.233		0.88	1	1.054	0.173	0.099	0.323		1	1	8				Mbd5	green	0.034	0.138	0.07		0.136	1	1.674	0.226	0.18	0.281		0	0	265				Tjap1	turquoise	0.266	1	-0.135		0.316	1	0.668	0.818	0.824
	Coro2a	greenyellow	0.02	0.06	-0.215		0.025	0.08	0.446	0.069	0.17	0.053		0.004	1	67				Ccdc85a	turquoise	0.034	0.14	0.108		0.663	1	1.162	0.442	0.589	0.46		0	0	175				Sdccag3	purple	0.101	1	-0.115		0.364	1	0.694	0.688	0.748
	Sox2	yellow	0.02	0.061	0.128		0.071	1	0.524	0.292	0.406	0.11		1	1	21				Gpatch11	green	0.034	0.142	0.079		0.951	1	0.98	0.47	0.535	0.446		0	0	155				Hdac6	turquoise	0.139	1	-0.104		0.772	1	0.889	0.638	0.687
	Alg11	turquoise	0.02	0.067	0.121		0	0	5.353	0.152	0.254	0.195		1	1	3				Coq6	blue	0.034	0.142	-0.086		0.036	0.103	0.484	0.239	0.218	0.382		0.135	1	114				Ampd2	turquoise	0.064	1	-0.132		0.55	1	0.786	0.667	0.611
	Ptprz1	tan	0.02	0.067	0.141		0.818	1	1.084	0.182	0.147	0.148		1	1	5				Fgf12	blue	0.034	0.143	0.106		0.871	1	1.058	0.589	0.717	0.522		0	0	265				Shoc2	blue	0.481	1	0.035		0.155	1	1.769	0.845	0.887
	Txndc15	red	0.02	0.067	-0.07		0.297	1	0.69	0.115	0.142	0.109		1	1	5				Nbeal1	green	0.034	0.143	0.128		0.429	1	1.313	0.464	0.546	0.423		0	0	305				Mcf2l	turquoise	0.166	1	-0.105		0.67	1	0.842	0.58	0.593
	Tgfb3	yellow	0.02	0.067	0.155		0.089	1	0.545	0.256	0.336	0.097		1	1	2				Mmadhc	cyan	0.034	0.143	-0.062		0.416	1	0.757	0.313	0.471	0.246		0.057	1	119				Copb2	black	0.192	1	0.05		0.659	1	1.192	0.898	0.856
	Sphkap	purple	0.02	0.067	-0.2		0.489	1	1.277	0.105	0.192	0.085		1	1	5				Sema3d	blue	0.034	0.143	-0.217		0.205	1	0.647	0.143	0.228	0.145		0	0	228				Zfp384	turquoise	0.107	1	-0.117		0.363	1	0.693	0.769	0.846
	Tmed3	brown	0.021	0.068	-0.077		0.717	1	0.879	0.152	0.1	0.299		1	1	25				Gprin3	magenta	0.034	0.153	0.304		0	0	8.91	0.63	0.207	0.684		0	0	233				Fam171b	blue	0.738	1	0.015		0.122	1	1.862	0.903	0.897
	Rcan1	cyan	0.021	0.068	0.08		0.817	1	1.085	0.078	0.031	0.152		1	1	8				Oxr1	blue	0.035	0.154	0.105		0.271	1	0.686	0.697	0.753	0.647		1	1	29				Clk2	turquoise	0.06	1	-0.147		0.093	1	0.507	0.608	0.618
	Zfpm2	greenyellow	0.021	0.068	0.219		0.847	1	1.07	0.429	0.647	0.404		1	1	4				Nras	blue	0.035	0.154	0.069		0.262	1	0.68	0.48	0.644	0.341		0	0	281				Cdc42	greenyellow	0.351	1	0.032		0.561	1	1.26	0.993	1
	Hmgcr	greenyellow	0.021	0.068	-0.112		0.146	1	0.595	0.029	0.022	0.106		1	1	25				Zfp740	yellow	0.035	0.157	-0.097		0.387	1	0.744	0.323	0.277	0.432		1	1	25				Adck5	turquoise	0.759	1	-0.032		0.838	1	0.921	0.682	0.736
	Ero1l	tan	0.021	0.069	0.101		0.17	1	1.626	0.506	0.373	0.526		1	1	9				Pcdhgc5	magenta	0.035	0.157	0.356		0	0	5.392	1	0.923	0.993		0	0	305				Gm37963	turquoise	0.135	1	-0.262		0.55	1	0.786	0.773	0.847
	Cacna1g	midnightblue	0.021	0.069	-0.257		0.837	1	1.075	0.425	0.391	0.459		1	1	11				Bhlhe41	blue	0.035	0.157	0.122		0.45	1	0.772	0.189	0.175	0.243		1	1	9				Abca2	magenta	0.293	1	-0.079		0.923	1	0.961	0.852	0.913
	Polb	blue	0.021	0.069	-0.095		0.47	1	1.29	0.062	0.073	0.059		1	1	4				Zbtb37	magenta	0.035	0.16	0.185		0.001	0.002	3.154	0.49	0.149	0.628		0.862	1	92				Aftph	purple	0.712	1	0.013		0.213	1	1.646	0.808	0.808
	Plxnd1	black	0.021	0.071	-0.217		0.143	1	0.593	0.41	0.472	0.291		0.983	1	34				Creg2	lightgreen	0.036	0.163	0.149		0.001	0.001	3.334	0.462	0.354	0.471		1	1	12				Rfx1	turquoise	0.074	1	-0.22		0.073	1	0.483	0.905	0.917
	Trim37	turquoise	0.021	0.071	0.11		0.074	1	1.887	0.073	0.053	0.14		1	1	19				G630016G05Rik	darkred	0.036	0.163	-0.187		0.094	1	0.561	0.37	0.447	0.297		1	1	4				Psd3	blue	0.229	1	0.068		0.039	1	2.306	0.805	0.702
	Cntnap5a	purple	0.021	0.072	-0.143		0.731	1	0.885	0.679	0.611	0.8		0	0	82				Plekhg5	pink	0.036	0.164	-0.163		0.056	1	0.517	0.726	0.773	0.674		1	1	9				Ptpn23	turquoise	0.104	1	-0.193		0.034	1	0.422	0.894	0.93
	Tubb4a	greenyellow	0.021	0.072	-0.119		0.961	1	1.017	0.1	0.057	0.226		1	1	18				Hibadh	pink	0.036	0.165	0.068		0.186	1	0.635	0.348	0.556	0.167		1	1	60				Epm2aip1	blue	0.252	1	0.064		0.034	1	2.353	0.877	0.838
	Rapgef5	blue	0.022	0.072	0.221		0.066	1	1.924	0.148	0.056	0.242		0.024	1	62				Zfp318	brown	0.036	0.165	-0.062		0.015	0.035	0.429	0.181	0.307	0.068		0.719	1	97				Man2c1	turquoise	0.125	1	-0.163		0.13	1	0.542	0.837	0.846
	Ptpdc1	yellow	0.022	0.074	0.114		0.496	1	1.271	0.782	0.732	0.708		1	1	7				Trps1	green	0.036	0.166	0.127		0.285	1	1.446	0.426	0.399	0.463		0	0	324				Ncln	turquoise	0.38	1	-0.064		0.221	1	0.61	0.65	0.712
	Tbc1d8b	blue	0.022	0.075	0.214		0.045	1	2.044	0.106	0.08	0.129		0.024	1	62				Ubxn2a	midnightblue	0.036	0.166	0.147		0.033	0.091	2.099	0.703	0.688	0.689		0.082	1	117				Capza2	purple	0.356	1	0.048		0.744	1	1.139	0.787	0.843
	5031439G07Rik	midnightblue	0.022	0.075	-0.14		0.29	1	0.686	0.252	0.208	0.328		1	1	12				Neurl1a	grey60	0.036	0.166	-0.082		0.612	1	0.841	0.477	0.624	0.476		1	1	60				Dmpk	turquoise	0.077	1	-0.272		0.286	1	0.651	0.82	0.817
	Togaram2	black	0.022	0.075	-0.248		0.128	1	1.716	0.027	0.008	0.163		0.997	1	30				Clint1	blue	0.036	0.167	0.055		0.252	1	0.675	0.537	0.635	0.446		0	0	198				Rpl23	yellow	0.74	1	0.02		0.543	1	1.274	0.983	0.946
	Sik2	blue	0.022	0.076	0.278		0.008	0.016	2.594	0.572	0.374	0.681		0.983	1	34				Nt5c3b	green	0.036	0.167	-0.086		0.365	1	1.367	0.391	0.31	0.488		1	1	22				Caskin1	magenta	0.11	1	-0.124		0.195	1	0.593	0.892	0.897
	Fam91a1	tan	0.022	0.076	0.092		0.779	1	0.905	0.568	0.52	0.511		1	1	7				Cacna1i	black	0.036	0.167	-0.158		0.76	1	0.901	0.212	0.45	0.097		0	0	286				Pja1	black	0.69	1	0.013		0.555	1	1.265	0.994	0.977
	Dip2a	yellow	0.022	0.076	-0.122		0.827	1	1.08	0.259	0.123	0.304		1	1	9				Washc3	greenyellow	0.036	0.172	0.09		0.07	1	1.872	0.318	0.535	0.468		1	1	39				Fbxl5	turquoise	0.837	1	0.01		0.319	1	1.489	0.453	0.56
	Slco1a4	lightyellow	0.022	0.076	-0.166		0.497	1	0.786	0.327	0.194	0.324		1	1	3				Rnf38	turquoise	0.036	0.173	0.07		0.202	1	0.645	0.36	0.515	0.255		1	1	38				Mast2	magenta	0.219	1	-0.086		0.9	1	0.95	0.817	0.777
	Gpr6	black	0.022	0.078	-0.24		0.133	1	0.585	0.567	0.634	0.385		1	1	15				Ufd1	turquoise	0.037	0.175	-0.066		0.017	0.04	0.437	0.274	0.404	0.198		1	1	70				Dus3l	turquoise	0.089	1	-0.158		0.206	1	0.6	0.808	0.808
	Fam183b	midnightblue	0.022	0.078	-0.32		0.518	1	0.795	0.179	0.145	0.22		1	1	6				Sh3kbp1	turquoise	0.036	0.175	0.088		0.84	1	0.934	0.196	0.251	0.219		1	1	38				Fdxr	turquoise	0.378	1	-0.082		0.768	1	1.124	0.521	0.529
	Atp10a	yellow	0.022	0.078	0.176		0.235	1	1.522	0.161	0.203	0.134		0	0	192				Lmtk2	red	0.036	0.175	0.097		0.029	0.08	2.137	0.345	0.256	0.527		0	0	505				Mov10	turquoise	0.037	1	-0.284		0.404	1	0.714	0.735	0.704
	Agtr2	midnightblue	0.022	0.078	-0.246		0.486	1	0.781	0.25	0.124	0.482		1	1	3				Sdc2	pink	0.037	0.176	0.129		0.556	1	1.225	0.115	0.113	0.149		0.991	1	80				Dclk2	magenta	0.178	1	-0.076		0.732	1	0.871	0.822	0.835
	Ryk	yellow	0.022	0.082	0.076		0.307	1	1.435	0.173	0.137	0.212		0.711	1	44				Smap1	magenta	0.037	0.176	0.141		0.002	0.003	2.991	0.714	0.639	0.74		1	1	71				Atp8a1	blue	0.67	1	0.019		0.185	1	1.702	0.797	0.677
	Lpin2	yellow	0.023	0.083	0.075		0.963	1	1.016	0.581	0.356	0.602		1	1	7				Scoc	turquoise	0.037	0.177	-0.187		0.184	1	0.634	0.175	0.327	0.093		1	1	64				Crk	blue	0.446	1	0.036		0.326	1	1.481	0.883	0.856
	Paxx	green	0.023	0.085	-0.111		0.274	1	1.473	0.191	0.114	0.272		1	1	24				Appl1	blue	0.037	0.179	0.074		0.583	1	1.208	0.288	0.284	0.352		1	1	64				Rhbdf1	turquoise	0.11	1	-0.164		0.942	1	1.028	0.63	0.603
	Dctn3	green	0.023	0.085	-0.098		0	0	0.229	0.078	0.076	0.484		0	0	134				Tor2a	blue	0.037	0.182	-0.09		0.566	1	1.219	0.383	0.364	0.508		0.53	1	102				Rpl11	yellow	0.978	1	-0.002		0.984	1	1.007	0.883	0.873
	Cops8	brown	0.023	0.086	-0.05		0.372	1	1.371	0.087	0.443	0.029		0	0	205				Phyhipl	pink	0.037	0.186	0.062		0.707	1	1.139	0.172	0.352	0.091		0	0	542				Sirt6	turquoise	0.057	1	-0.176		0.074	1	0.485	0.695	0.742
	Spata13	yellow	0.023	0.087	0.15		0.598	1	1.204	0.852	0.703	0.76		1	1	5				Zfp719	blue	0.037	0.187	0.096		0.452	1	1.295	0.376	0.433	0.409		0.934	1	88				Med12	turquoise	0.117	1	-0.246		0.365	1	0.694	0.732	0.748
	N4bp2	yellow	0.023	0.087	0.148		0.859	1	0.939	0.324	0.444	0.233		0.074	1	58				Cc2d1b	yellow	0.037	0.187	-0.155		0.267	1	0.683	0.749	0.848	0.679		1	1	22				Scamp1	purple	0.082	1	0.069		0.945	1	1.027	0.757	0.762
	Inafm2	yellow	0.023	0.088	0.084		0.362	1	1.38	0.356	0.162	0.45		1	1	19				Ube2d1	purple	0.037	0.187	-0.081		0.341	1	0.721	0.294	0.671	0.148		0	0	363				Traf7	turquoise	0.056	1	-0.151		0.16	1	0.567	0.817	0.835
	Stk16	lightcyan	0.023	0.088	-0.092		0.816	1	1.085	0.141	0.138	0.179		1	1	7				Akr7a5	blue	0.038	0.188	-0.145		0.051	0.268	0.51	0.432	0.572	0.35		1	1	39				Vars	turquoise	0.081	1	-0.193		0.183	1	0.584	0.792	0.815
	Fgd6	yellow	0.023	0.088	0.109		0.854	1	1.067	0.029	0.016	0.063		1	1	16				Tbcel	tan	0.038	0.188	0.058		0.29	1	0.696	0.29	0.367	0.28		1	1	6				Cacna1g	turquoise	0.066	1	-0.229		0.024	0.165	0.398	0.767	0.801
	Adora2a	black	0.024	0.09	-0.226		0.316	1	0.7	0.573	0.497	0.616		1	1	15				Slc27a1	pink	0.038	0.189	-0.124		0.606	1	0.838	0.368	0.267	0.607		1	1	3				Dennd4b	turquoise	0.096	1	-0.105		0.942	1	0.97	0.561	0.692
	Tmem28	blue	0.024	0.09	0.107		0.436	1	1.317	0.025	0.016	0.048		0.998	1	29				Aff2	magenta	0.038	0.189	0.378		0	0	7.503	0.683	0.153	0.798		0	0	375				Cul3	purple	0.823	1	-0.01		0.554	1	1.266	0.888	0.88
	Naa10	green	0.024	0.091	-0.127		0.441	1	1.312	0.425	0.358	0.444		1	1	18				Lnpep	magenta	0.038	0.198	0.337		0	0	33.865	0.611	0.123	0.693		0.947	1	87				Smurf1	turquoise	0.562	1	-0.04		0.362	1	0.693	0.645	0.824
	Gskip	yellow	0.024	0.091	0.071		0.717	1	1.136	0.147	0.108	0.131		1	1	3				Chadl	purple	0.038	0.206	-0.153		0.214	1	0.653	0.253	0.478	0.115		1	1	56				Ulk2	blue	0.979	1	0.001		0.647	1	1.2	0.797	0.855
	Kctd2	yellow	0.024	0.091	-0.082		0.572	1	0.818	0.055	0.025	0.078		1	1	0				Ptprz1	lightgreen	0.038	0.207	0.123		0.175	1	1.598	0.424	0.125	0.712		0	0	309				Gnaq	green	0.737	1	0.019		0.095	1	1.957	0.988	0.947
	Crtac1	black	0.024	0.093	-0.162		0.46	1	0.769	0.142	0.114	0.161		1	1	10				Ankmy2	turquoise	0.038	0.208	0.077		0.576	1	0.826	0.131	0.338	0.047		0	0	209				Rad21	purple	0.495	1	0.032		0.417	1	1.382	0.898	0.819
	Frmpd4	tan	0.024	0.094	0.122		0.725	1	0.882	0.72	0.66	0.699		0	0	91				Smad4	lightgreen	0.038	0.208	0.072		0.219	1	1.528	0.404	0.309	0.391		0	0	249				Kifap3	black	0.459	1	0.029		0.764	1	1.126	0.965	0.973
	Wdr1	yellow	0.024	0.094	0.071		0.642	1	0.848	0.498	0.356	0.528		1	1	17				Aldh6a1	turquoise	0.038	0.213	0.101		0.448	1	0.771	0.48	0.509	0.577		1	1	34				Mmgt1	purple	0.661	1	0.02		0.593	1	1.237	0.791	0.877
	Spag5	tan	0.024	0.094	-0.332		0.773	1	0.903	0.153	0.165	0.11		1	1	5				Zfp84	magenta	0.038	0.213	0.121		0.007	0.013	2.57	0.422	0.072	0.657		0	0	155				Gmps	purple	0.753	1	0.016		0.218	1	1.638	0.876	0.862
	1700066M21Rik	purple	0.024	0.096	-0.13		0.73	1	1.129	0.158	0.214	0.161		1	1	23				Scai	turquoise	0.039	0.222	0.11		0.729	1	0.888	0.656	0.75	0.693		1	1	39				Ptprs	magenta	0.508	1	-0.044		0.157	1	0.565	0.84	0.877
	Slc35b1	brown	0.025	0.097	-0.064		0.676	1	0.862	0.17	0.078	0.456		0.017	1	63				Orc3	turquoise	0.038	0.222	-0.084		0.02	0.047	0.447	0.449	0.559	0.399		1	1	8				Ube2o	magenta	0.491	1	-0.043		0.339	1	0.681	0.971	0.973
	Strip2	midnightblue	0.025	0.098	0.138		0.98	1	0.991	0.297	0.322	0.26		0.057	1	59				Slc39a6	lightgreen	0.039	0.223	0.089		0.176	1	1.595	0.704	0.558	0.614		1	1	18				Pum2	blue	0.917	1	0.005		0.098	1	1.947	0.69	0.626
	Man1a	black	0.025	0.099	-0.174		0.315	1	0.699	0.683	0.698	0.598		1	1	14				Zfp462	tan	0.039	0.234	0.113		0.06	1	1.921	0.353	0.461	0.412		0.862	1	92				Rpl19	yellow	0.486	1	0.038		0.493	1	1.315	0.909	0.876
	Praf2	green	0.025	0.099	-0.067		0.598	1	1.204	0.149	0.108	0.234		0.999	1	28				Csnk1g3	blue	0.039	0.237	0.086		0.907	1	0.961	0.803	0.81	0.842		0.003	1	131				Gga3	turquoise	0.093	1	-0.093		0.142	1	0.552	0.819	0.849
	1700086L19Rik	tan	0.025	0.102	0.142		0.18	1	1.608	0.692	0.455	0.765		0.997	1	30				Clvs1	magenta	0.039	0.238	0.246		0	0	3.78	0.816	0.478	0.889		1	1	49				Safb2	turquoise	0.053	1	-0.22		0.117	1	0.53	0.888	0.941
	Ntrk1	black	0.025	0.102	-0.46		0.002	0.003	0.316	0.215	0.208	0.225		1	1	9				Ylpm1	green	0.04	0.244	0.053		0.524	1	1.245	0.653	0.7	0.628		0	0	168				Oxct1	black	0.676	1	0.015		0.995	1	0.997	0.841	0.787
	Slc25a42	red	0.025	0.103	0.136		0.255	1	1.497	0.441	0.502	0.358		1	1	4				Gm10925	brown	0.04	0.244	-0.179		0.642	1	0.853	0.243	0.306	0.232		1	1	10				Zfp638	tan	0.652	1	0.021		0.386	1	1.414	0.895	0.764
	A230065H16Rik	midnightblue	0.026	0.103	-0.331		0.899	1	0.956	0.457	0.416	0.489		1	1	4				Dcc	magenta	0.04	0.244	0.341		0	0	10.878	0.716	0.281	0.766		0	0	331				Akap8l	turquoise	0.121	1	-0.139		0.319	1	0.669	0.602	0.654
	Myl6b	midnightblue	0.026	0.103	-0.157		0.646	1	1.175	0.195	0.194	0.176		1	1	1				Rarg	pink	0.04	0.246	-0.156		0.061	1	0.524	0.426	0.509	0.333		1	1	1				Zfp523	turquoise	0.179	1	-0.098		0.12	1	0.533	0.687	0.76
	Ppp3ca	black	0.026	0.104	-0.121		0.03	0.121	0.458	0.61	0.692	0.444		1	1	15				Sarnp	brown	0.04	0.246	-0.112		0.092	1	0.56	0.184	0.17	0.259		1	1	0				Numa1	magenta	0.264	1	-0.068		0.662	1	1.19	0.696	0.606
	Trim66	midnightblue	0.026	0.104	-0.145		0.18	1	0.62	0.502	0.461	0.514		1	1	5				Slc1a1	turquoise	0.04	0.254	-0.067		0.013	0.03	0.423	0.434	0.602	0.314		1	1	38				Fundc1	turquoise	0.258	1	0.057		0.621	1	1.218	0.462	0.493
	Penk	black	0.026	0.104	-0.169		0.777	1	0.904	0.13	0.131	0.122		1	1	6				Yae1d1	pink	0.04	0.261	0.12		0.038	0.122	0.488	0.106	0.143	0.077		1	1	29				Rps17	yellow	0.872	1	-0.01		0.993	1	0.995	0.911	0.933
	Stxbp5l	blue	0.026	0.105	0.204		0.041	1	2.072	0.6	0.392	0.765		0	0	129				Stag1	red	0.041	0.263	-0.117		0.645	1	0.854	0.467	0.515	0.484		0	0	831				Pafah1b1	green	0.691	1	0.02		0.423	1	1.377	0.95	0.891
	Tmem64	turquoise	0.026	0.105	0.096		0.442	1	1.312	0.08	0.019	0.285		0	0	308				Pam	lightgreen	0.041	0.263	0.091		0.02	0.047	2.246	0.652	0.604	0.554		1	1	16				Spout1	turquoise	0.163	1	-0.107		0.862	1	0.932	0.6	0.559
	Dtnbp1	tan	0.027	0.107	-0.093		0.859	1	0.939	0.167	0.258	0.08		1	1	8				Pcdh11x	lightgreen	0.041	0.264	0.181		0.054	1	1.951	0.818	0.589	0.744		1	1	55				Calm1	blue	0.987	1	-0.001		0.419	1	1.38	0.751	0.869
	Cep41	yellow	0.026	0.107	0.124		0.202	1	1.571	0.106	0.166	0.118		0.907	1	39				Mtmr9	magenta	0.041	0.264	0.256		0	0	7.445	0.984	0.707	0.988		0.025	1	123				Gcc2	green	0.311	1	0.042		0.266	1	1.56	0.815	0.823
	Snf8	blue	0.027	0.115	-0.095		0.44	1	1.313	0.487	0.526	0.537		0	0	99				Nol4	green	0.041	0.265	0.134		0.149	1	1.646	0.678	0.562	0.782		0	1	140				Map4k2	turquoise	0.032	1	-0.256		0.043	1	0.439	0.85	0.875
	Mrps16	brown	0.027	0.115	-0.109		0.452	1	1.304	0.396	0.354	0.511		1	1	5				Atad5	brown	0.041	0.276	-0.12		0.321	1	0.711	0.24	0.329	0.189		0	0	168				Sugt1	black	0.685	1	-0.017		0.979	1	1.01	0.786	0.963
	Ints6	tan	0.027	0.115	0.101		0.678	1	1.158	0.211	0.162	0.23		0.989	1	33				Mettl23	greenyellow	0.041	0.276	-0.097		0.78	1	0.909	0.471	0.48	0.519		1	1	4				Neurl4	magenta	0.364	1	-0.058		0.503	1	0.764	0.872	0.932
	Slc38a2	grey60	0.027	0.115	-0.104		0.387	1	0.735	0.353	0.268	0.443		1	1	14				Adra1a	magenta	0.041	0.276	0.243		0	0	7.115	0.612	0.077	0.758		0	0	370				Lmbr1l	turquoise	0.075	1	-0.208		0.459	1	0.742	0.736	0.714
	C2cd4c	midnightblue	0.027	0.115	-0.145		0.878	1	1.055	0.274	0.218	0.302		1	1	0				Cluap1	greenyellow	0.041	0.278	-0.091		0.382	1	0.741	0.369	0.391	0.392		1	1	11				Csde1	purple	0.956	1	0.002		0.713	1	1.157	0.786	0.764
	Ap2b1	cyan	0.027	0.117	0.067		0.316	1	1.426	0.44	0.289	0.597		1	1	8				Cops2	turquoise	0.766	1	0.013		0.037	0.109	0.486	1	1	0.974		1	1	6				Map9	purple	0.392	1	0.035		0.218	1	1.638	0.791	0.65
	Tmem68	turquoise	0.027	0.117	0.129		0.475	1	1.287	0.084	0.054	0.187		0.805	1	42				Taok1	blue	0.679	1	0.017		0.12	1	0.586	0.911	0.949	0.856		0.57	1	101				Dpp10	black	0.838	1	0.011		0.769	1	1.123	0.76	0.736
	Mark1	red	0.027	0.117	0.061		0.8	1	1.093	0.181	0.135	0.234		0.057	1	59				Snx2	turquoise	0.843	1	0.007		0.159	1	0.616	0.941	0.97	0.883		1	1	28				Paics	black	0.569	1	0.021		0.356	1	1.446	0.736	0.807
	Lamtor4	brown	0.028	0.118	-0.12		0.908	1	0.959	0.445	0.374	0.615		0.429	1	49				Cul3	blue	0.754	1	0.012		0.097	1	0.564	0.945	0.995	0.881		1	1	58				Ythdf1	black	0.424	1	0.026		0.759	1	1.129	0.771	0.713
	Cdk19	black	0.027	0.118	-0.091		0.025	0.085	0.448	0.807	0.773	0.805		0.805	1	42				Yme1l1	turquoise	0.447	1	0.034		0.123	1	0.588	0.965	0.973	0.949		1	1	28				Farp1	turquoise	0.376	1	-0.065		0.936	1	1.031	0.504	0.511
	Rcc2	red	0.028	0.118	0.113		0.57	1	1.222	0.168	0.148	0.212		0.983	1	34				Matr3	turquoise	0.882	1	-0.007		0.047	0.195	0.503	0.994	0.979	0.999		1	1	3				Bzw1	black	0.067	1	0.097		0.085	1	2.001	0.695	0.631
	Grhpr	tan	0.027	0.118	-0.118		0.144	1	0.594	0.089	0.296	0.019		1	1	24				Pum2	blue	0.478	1	0.029		0.254	1	0.676	0.904	0.914	0.867		0	0	231				Rtcb	red	0.92	1	-0.004		0.759	1	0.884	0.705	0.801
	Gm4419	yellow	0.028	0.119	0.199		0	0	4.621	0.104	0.029	0.159		1	1	19				Wapl	turquoise	0.922	1	0.004		0.373	1	0.737	0.938	0.985	0.899		1	1	54				Pdhx	black	0.272	1	0.036		0.667	1	0.841	0.83	0.712
	Adam23	cyan	0.028	0.12	-0.074		0.252	1	1.5	0.155	0.253	0.176		1	1	5				Ccnc	turquoise	0.468	1	0.033		0.068	1	0.533	0.983	0.985	0.961		1	1	12				2410089E03Rik	purple	0.147	1	-0.114		0.98	1	0.989	0.643	0.694
	Tmem132b	cyan	0.028	0.122	0.106		0.476	1	1.286	0.259	0.501	0.165		0.93	1	38				Dhx36	turquoise	0.578	1	-0.022		0.14	1	0.602	0.964	0.948	1		1	1	29				Ndufb5	yellow	0.734	1	0.017		0.499	1	1.31	0.956	0.925
	Ttc39a	midnightblue	0.028	0.124	-0.215		0.004	0.008	0.353	0.535	0.668	0.425		1	1	26				Gpbp1	blue	0.884	1	0.006		0.103	1	0.57	0.888	0.905	0.877		0.158	1	113				B3gat1	turquoise	0.177	1	-0.08		0.717	1	0.864	0.474	0.456
	Nadk	yellow	0.028	0.125	0.05		0.114	1	1.753	0.255	0.15	0.271		1	1	4				Pkia	turquoise	0.314	1	0.054		0.112	1	0.579	0.941	0.957	0.926		1	1	35				Zfp512b	turquoise	0.121	1	-0.14		0.357	1	0.69	0.675	0.674
	Frrs1l	tan	0.028	0.127	0.123		0.737	1	1.125	0.307	0.463	0.176		1	1	19				Selenot	turquoise	0.374	1	0.04		0.093	1	0.561	0.94	0.937	0.943		1	1	20				Serinc1	greenyellow	0.845	1	0.009		0.63	1	1.212	0.8	0.752
	Tm9sf4	lightyellow	0.028	0.131	0.087		0.439	1	1.314	0.438	0.572	0.224		1	1	17				Atf2	blue	0.329	1	0.042		0.411	1	0.755	0.978	1	0.924		0.684	1	98				Hdac7	turquoise	0.032	1	-0.221		0.059	1	0.464	0.779	0.827
	Ezr	yellow	0.028	0.133	0.127		0.544	1	1.238	0.836	0.717	0.821		1	1	18				Gmfb	blue	0.814	1	0.01		0.078	1	0.544	0.897	0.879	0.948		0	0	153				Cc2d1b	turquoise	0.039	1	-0.179		0.611	1	0.815	0.577	0.586
	Prrt4	purple	0.028	0.133	0.204		0.023	0.066	2.259	0.332	0.256	0.481		0	0	101				Dld	turquoise	0.804	1	-0.01		0.095	1	0.563	0.964	0.964	0.946		1	1	21				Ndufs4	yellow	0.264	1	0.055		0.496	1	1.312	0.881	0.932
	Lancl3	blue	0.029	0.156	0.375		0.087	1	1.838	0.258	0.187	0.306		1	1	20				Rab14	blue	0.758	1	0.011		0.223	1	0.658	0.939	0.976	0.884		0.812	1	94				Col4a2	turquoise	0.347	1	-0.113		0.334	1	0.677	0.679	0.756
	Gda	tan	0.029	0.157	0.118		0.697	1	1.147	0.897	0.803	0.827		0.907	1	39				Gpm6a	turquoise	0.587	1	0.025		0.244	1	0.67	0.933	0.939	0.931		1	1	44				Eloc	red	0.486	1	0.033		0.566	1	1.257	0.738	0.676
	Lrrc49	grey60	0.029	0.157	0.086		0.474	1	1.287	0.375	0.456	0.239		1	1	12				Kpna3	blue	0.767	1	0.013		0.164	1	0.619	0.954	0.97	0.929		0	0	169				Capn15	magenta	0.346	1	-0.136		0.229	1	0.615	0.878	0.84
	Ago2	yellow	0.029	0.159	0.083		0.243	1	1.511	0.31	0.271	0.336		0	0	190				Stx12	turquoise	0.533	1	0.022		0.108	1	0.575	0.822	0.857	0.765		0.999	1	72				Dnajc5	green	0.424	1	0.028		0.544	1	1.274	0.931	0.965
	Ubash3b	yellow	0.029	0.16	0.133		0.667	1	1.164	0.4	0.248	0.533		1	1	12				Ppp4r3b	turquoise	0.641	1	0.021		0.039	0.127	0.49	0.928	0.967	0.841		1	1	21				Tax1bp1	black	0.353	1	0.035		0.269	1	1.556	0.795	0.798
	Gid4	magenta	0.029	0.16	-0.09		0.139	1	1.69	0.058	0.048	0.126		1	1	19				Syncrip	turquoise	0.828	1	0.01		0.021	0.051	0.45	0.945	0.972	0.89		0.973	1	84				Phc1	turquoise	0.224	1	-0.078		0.579	1	0.8	0.564	0.564
	Hyi	yellow	0.029	0.16	-0.192		0.153	1	0.601	0.095	0.33	0.01		0.658	1	45				Abi2	turquoise	0.873	1	-0.007		0.042	0.153	0.495	0.936	0.95	0.892		1	1	4				Nbea	green	0.74	1	0.016		0.051	1	2.2	0.952	0.819
	Lrrc10b	black	0.03	0.162	-0.21		0.258	1	0.669	0.374	0.392	0.319		1	1	12				Sept7	turquoise	0.811	1	-0.012		0.086	1	0.553	0.952	0.935	0.965		1	1	20				Coro6	turquoise	0.201	1	-0.217		0.246	1	0.627	0.724	0.774
	Foxp2	black	0.03	0.166	-0.268		0.034	0.16	0.466	0.295	0.356	0.211		1	1	6				Cul2	turquoise	0.615	1	0.016		0.068	1	0.533	0.89	0.937	0.802		0.999	1	72				Ccny	blue	0.513	1	0.029		0.059	1	2.144	0.81	0.773
	Bmpr2	turquoise	0.627	1	0.027		0.072	1	1.895	1	1	0.975		0	0	86				Rab1a	turquoise	0.522	1	0.02		0.09	1	0.557	0.931	0.95	0.887		1	1	10				Rnf14	black	0.937	1	-0.002		0.79	1	0.898	0.783	0.772
	Pten	turquoise	0.519	1	0.04		0.004	0.008	2.795	0.568	0.432	0.667		0	0	88				Crbn	turquoise	0.97	1	0.002		0.273	1	0.686	0.863	0.934	0.786		0.337	1	107				Cntn1	blue	0.332	1	0.058		0.046	1	2.237	0.873	0.865
	Arhgap5	blue	0.379	1	0.095		0.008	0.016	2.591	0.601	0.477	0.658		0.012	1	64				Dnaja2	turquoise	0.78	1	-0.009		0.125	1	0.589	0.943	0.93	0.952		1	1	9				Sympk	magenta	0.701	1	-0.025		0.801	1	0.903	0.757	0.838
	Ipo7	blue	0.247	1	0.103		0.022	0.06	2.265	0.812	0.764	0.814		0.964	1	36				Cdc42	turquoise	0.807	1	0.007		0.056	1	0.516	0.851	0.928	0.71		1	1	3				Nipa2	black	0.346	1	0.045		0.225	1	1.625	0.704	0.5
	Crk	turquoise	0.517	1	0.027		0.023	0.067	2.256	0.781	0.596	0.903		0	0.003	73				Ppig	turquoise	0.661	1	0.019		0.346	1	0.724	0.878	0.944	0.816		0	0.001	147				Kif1b	blue	0.64	1	0.019		0.012	0.033	2.789	0.773	0.978
	Dlg2	blue	0.092	1	0.171		0.016	0.037	2.371	1	0.949	1		0.93	1	38				Suco	turquoise	0.743	1	0.015		0.098	1	0.566	0.871	0.948	0.751		1	1	44				Tcaf1	blue	0.825	1	0.009		0.175	1	1.723	0.776	0.766
	Akap11	turquoise	0.602	1	0.022		0.007	0.014	2.63	0.576	0.433	0.658		0	0	113				Suz12	turquoise	0.513	1	0.03		0.208	1	0.649	0.942	0.95	0.936		1	1	5				Tmem170b	blue	0.565	1	0.029		0.062	1	2.124	0.873	0.721
	Pja2	turquoise	0.78	1	0.014		0.018	0.043	2.336	0.56	0.398	0.661		0	0.003	73				Phf6	blue	0.266	1	0.055		0.454	1	0.774	0.884	0.869	0.884		0	0	165				Fem1b	blue	0.566	1	0.025		0.701	1	1.165	0.736	0.722
	Usp9x	blue	0.108	1	0.144		0.002	0.004	3.063	0.808	0.707	0.823		1	1	24				Ppp6c	turquoise	0.94	1	-0.003		0.045	0.169	0.5	0.91	0.904	0.903		1	1	12				Prkar1a	blue	0.221	1	0.044		0.415	1	1.384	0.721	0.759
	Snx13	turquoise	0.425	1	0.041		0.195	1	1.583	0.746	0.722	0.765		0.964	1	36				Dek	turquoise	0.606	1	-0.025		0.17	1	0.624	0.917	0.969	0.855		1	1	7				Rnf123	magenta	0.265	1	-0.114		0.575	1	0.798	0.815	0.83
	Camsap2	turquoise	0.097	1	0.075		0.107	1	1.771	0.709	0.665	0.823		0.009	1	65				Cd164	turquoise	0.853	1	-0.01		0.068	1	0.533	0.864	0.935	0.751		0.92	1	89				Ppp4r3b	turquoise	0.646	1	0.025		0.606	1	1.228	0.349	0.354
	Pura	turquoise	0.851	1	-0.008		0.019	0.048	2.315	0.709	0.518	0.844		0	0	89				Vcpip1	turquoise	0.457	1	0.037		0.188	1	0.636	0.906	0.93	0.877		0.116	1	115				Selenok	yellow	0.343	1	0.047		0.511	1	1.3	0.886	0.903
	Tnks2	turquoise	0.707	1	0.018		0.1	1	1.794	0.698	0.799	0.649		0	0.001	78				Ireb2	turquoise	0.597	1	0.023		0.058	1	0.519	0.912	0.94	0.852		1	1	19				Naca	yellow	0.76	1	-0.014		0.873	1	1.065	0.82	0.841
	Alg10b	blue	0.367	1	0.125		0.038	1	2.094	0.888	0.904	0.87		0.878	1	40				Eif2s2	turquoise	0.527	1	-0.023		0.029	0.08	0.47	0.893	0.908	0.878		1	1	13				Dazap1	turquoise	0.067	1	-0.112		0.309	1	0.664	0.641	0.731
	Vcpip1	turquoise	0.866	1	-0.009		0.141	1	1.685	0.876	0.875	0.883		0.93	1	38				Cab39	turquoise	0.795	1	-0.009		0.064	1	0.528	0.868	0.876	0.845		1	1	47				Slc9a5	turquoise	0.143	1	-0.146		0.203	1	0.598	0.708	0.736
	Trim44	blue	0.427	1	0.029		0.018	0.043	2.337	0.702	0.566	0.768		0	0	117				Ube2w	turquoise	0.334	1	0.04		0.182	1	0.632	0.905	0.925	0.886		1	1	18				Abce1	greenyellow	0.754	1	-0.011		0.82	1	1.094	0.762	0.678
	Lmbrd2	blue	0.239	1	0.222		0.008	0.016	2.601	0.881	0.949	0.826		1	1	27				Cpsf6	turquoise	0.547	1	0.027		0.181	1	0.631	0.893	0.91	0.868		1	1	28				Rexo1	magenta	0.075	1	-0.135		0.62	1	0.819	0.887	0.876
	Ptpn4	turquoise	0.571	1	0.032		0.139	1	1.689	0.77	0.675	0.857		0	0	119				Srsf1	turquoise	0.471	1	-0.028		0.044	0.169	0.499	0.867	0.948	0.753		1	1	17				Zmym3	turquoise	0.061	1	-0.144		0.535	1	0.779	0.648	0.63
	Fam120c	blue	0.308	1	0.101		0.011	0.024	2.482	0.835	0.752	0.848		0.074	1	58				Mfsd14b	turquoise	0.569	1	0.026		0.132	1	0.596	0.889	0.897	0.879		0.984	1	82				Lrrc45	turquoise	0.054	1	-0.26		0.083	1	0.495	0.787	0.786
	Nbea	turquoise	0.916	1	-0.004		0.007	0.013	2.643	0.46	0.244	0.655		0	0	159				Vbp1	turquoise	0.898	1	-0.007		0.082	1	0.55	0.865	0.904	0.787		1	1	6				Mecp2	green	0.912	1	-0.005		0.231	1	1.616	0.905	0.836
	Zyg11b	turquoise	0.905	1	0.006		0.01	0.021	2.522	0.45	0.266	0.579		0	0	82				Atad1	blue	0.173	1	0.065		0.578	1	0.827	0.939	0.93	0.946		0	0.003	143				Kras	purple	0.361	1	0.045		0.405	1	1.395	0.876	0.864
	Ankrd13c	turquoise	0.249	1	0.073		0.033	0.155	2.143	0.437	0.352	0.496		0	0	113				Eif1ax	blue	0.353	1	0.042		0.35	1	0.726	0.95	0.958	0.912		0	0	192				Bicdl1	turquoise	0.213	1	-0.081		0.912	1	0.956	0.52	0.539
	Taok1	turquoise	0.721	1	-0.015		0.467	1	1.293	0.896	0.844	0.997		0	0	88				Kpna4	turquoise	0.158	1	0.065		0.243	1	0.67	0.838	0.884	0.827		0.719	1	97				Akt3	green	0.624	1	0.029		0.186	1	1.7	0.946	0.849
	Gsk3b	blue	0.459	1	0.036		0.004	0.007	2.827	0.553	0.396	0.633		0	0	94				Cept1	brown	0.442	1	-0.033		0.052	0.284	0.512	0.9	0.902	0.865		1	1	2				Uqcrh	yellow	0.785	1	-0.015		0.571	1	1.253	0.976	0.949
	Pafah1b1	turquoise	0.673	1	-0.019		0.009	0.02	2.543	0.591	0.465	0.701		0.121	1	56				Eif4g2	blue	0.215	1	0.046		0.211	1	0.651	0.946	0.932	0.949		0	0	187				Tmsb4x	yellow	0.873	1	-0.009		0.615	1	1.222	0.89	0.922
	Eif4g2	turquoise	0.711	1	-0.014		0.057	1	1.969	0.693	0.526	0.838		0.878	1	40				Slc25a46	turquoise	0.836	1	0.008		0.04	0.131	0.491	0.85	0.908	0.741		1	1	9				Oxr1	blue	0.526	1	0.036		0.172	1	1.729	0.814	0.759
	Tmem30a	turquoise	0.536	1	-0.031		0.298	1	1.445	0.795	0.83	0.842		0.006	1	66				Capza2	blue	0.478	1	0.032		0.203	1	0.646	0.933	0.96	0.876		0.182	1	112				Arhgef9	green	0.955	1	-0.003		0.167	1	1.74	0.896	0.953
	Gnaq	blue	0.492	1	0.035		0.002	0.004	3.004	0.691	0.608	0.712		0	0.001	75				Tm9sf2	turquoise	0.995	1	0		0.171	1	0.625	0.87	0.926	0.784		0.49	1	103				Serbp1	purple	0.346	1	0.038		0.522	1	1.291	0.847	0.733
	Vps35	turquoise	0.848	1	0.009		0.049	1	2.017	0.663	0.455	0.799		0.964	1	36				Rbm27	blue	0.593	1	0.024		0.08	1	0.547	0.9	0.937	0.854		1	1	53				Gpd1l	blue	0.939	1	0.003		0.517	1	1.295	0.735	0.785
	Tmem106b	turquoise	0.705	1	0.018		0.007	0.015	2.612	0.788	0.488	1		0.151	1	55				Api5	blue	0.263	1	0.042		0.19	1	0.637	0.906	0.917	0.879		0.025	1	123				Plscr3	turquoise	0.23	1	-0.098		0.391	1	0.708	0.622	0.618
	Atf2	turquoise	0.594	1	-0.023		0.136	1	1.696	0.809	0.644	0.995		0	0.001	78				Avl9	blue	0.641	1	0.021		0.216	1	0.654	0.923	0.949	0.879		0	0	265				Ggt7	turquoise	0.572	1	-0.037		0.7	1	0.856	0.548	0.609
	Usp32	turquoise	0.653	1	-0.02		0.009	0.019	2.563	0.55	0.386	0.709		0	0	98				Picalm	turquoise	0.84	1	-0.008		0.052	0.283	0.511	0.902	0.939	0.827		0.302	1	108				Top2b	purple	0.949	1	0.003		0.245	1	1.593	0.776	0.753
	Glg1	blue	0.31	1	0.082		0.018	0.043	2.337	0.968	1	0.936		0.975	1	35				Bzw1	blue	0.336	1	0.044		0.429	1	0.763	0.942	0.948	0.914		0.069	1	118				Akap6	green	0.17	1	0.082		0.009	0.026	2.879	0.91	0.756
	Mib1	turquoise	0.885	1	0.008		0.729	1	1.129	0.624	0.561	0.741		0	0	108				Tmem30a	turquoise	0.865	1	0.008		0.101	1	0.569	0.922	0.961	0.846		0.53	1	102				Zswim8	turquoise	0.302	1	-0.08		0.031	1	0.416	0.66	0.712
	Pum2	turquoise	0.505	1	0.028		0.333	1	1.408	0.825	0.827	0.829		1	1	25				Eif5	turquoise	0.912	1	0.004		0.058	1	0.52	0.903	0.899	0.894		1	1	14				Slc2a8	turquoise	0.416	1	-0.058		0.73	1	1.147	0.62	0.733
	Itch	turquoise	0.533	1	0.024		0.191	1	1.59	0.742	0.572	0.868		0.002	1	69				Vma21	turquoise	0.054	1	0.089		0.089	1	0.557	0.899	0.953	0.895		1	1	19				BC031181	yellow	0.359	1	0.032		0.483	1	1.323	0.748	0.646
	Ppp1r12a	blue	0.131	1	0.098		0.23	1	1.529	0.684	0.526	0.849		0	0	90				Stx7	turquoise	0.285	1	0.039		0.218	1	0.655	0.833	0.895	0.77		1	1	45				5031439G07Rik	turquoise	0.067	1	-0.126		0.66	1	0.837	0.542	0.543
	Pdpk1	turquoise	0.341	1	0.042		0.054	1	1.983	0.483	0.311	0.606		0	0	89				Ssb	turquoise	0.564	1	0.023		0.191	1	0.638	0.856	0.865	0.85		1	1	18				Naa20	red	0.509	1	0.028		0.367	1	1.434	0.906	0.949
	Sptbn1	blue	0.566	1	0.019		0.084	1	1.848	0.754	0.661	0.847		0.024	1	62				Luc7l3	turquoise	0.611	1	-0.023		0.062	1	0.525	0.858	0.907	0.783		1	1	12				Smim7	greenyellow	0.557	1	0.016		0.902	1	0.951	0.703	0.647
	Negr1	turquoise	0.821	1	0.013		0.102	1	1.787	0.751	0.626	0.835		0	0	96				Trim23	turquoise	0.629	1	0.023		0.304	1	0.703	0.916	0.928	0.919		1	1	42				Plxna3	turquoise	0.238	1	-0.121		0.903	1	1.049	0.687	0.74
	Ndufs7	green	0.167	1	-0.077		0.984	1	0.992	1	1	0.986		0	0	93				Rnf11	turquoise	0.738	1	-0.015		0.124	1	0.589	0.936	0.933	0.932		1	1	10				Zc3h18	magenta	0.191	1	-0.073		0.321	1	0.67	0.673	0.613
	Cul4b	turquoise	0.396	1	0.056		0.006	0.012	2.682	0.574	0.437	0.655		1	1	24				Mbnl2	turquoise	0.621	1	0.024		0.049	0.226	0.506	0.942	0.942	0.916		1	1	19				Rpap1	turquoise	0.086	1	-0.135		0.421	1	0.723	0.697	0.664
	Pcdhgc5	blue	0.379	1	0.152		0.018	0.045	2.326	0.908	0.841	0.931		0.805	1	42				Ppp3cb	turquoise	0.987	1	0.001		0.078	1	0.545	0.923	0.92	0.905		1	1	3				Trank1	purple	0.165	1	-0.122		0.619	1	1.219	0.661	0.664
	Cope	green	0.824	1	-0.01		0.507	1	1.264	0.955	0.85	0.999		0.032	1	61				Gmps	blue	0.503	1	0.03		0.431	1	0.764	0.912	0.94	0.862		1	1	44				Wac	blue	0.577	1	-0.024		0.475	1	1.33	0.765	1
	Aff4	turquoise	0.299	1	0.048		0.028	0.104	2.194	0.508	0.403	0.579		0	0.001	78				Csnk1a1	turquoise	0.371	1	0.032		0.189	1	0.637	0.871	0.844	0.935		1	1	9				Pak3	blue	0.368	1	0.05		0.056	1	2.159	0.829	0.861
	Ash1l	blue	0.288	1	0.062		0.031	0.137	2.162	0.734	0.471	0.89		0	0	110				Zranb2	turquoise	0.865	1	0.008		0.128	1	0.593	0.891	0.895	0.872		1	1	40				Cpsf1	turquoise	0.036	1	-0.186		0.129	1	0.541	0.774	0.777
	Hectd1	blue	0.141	1	0.059		0.042	1	2.063	0.618	0.428	0.732		0.006	1	66				Skp1a	brown	0.351	1	-0.035		0.043	0.164	0.497	0.859	0.91	0.745		1	1	3				Rps7	yellow	0.725	1	0.021		0.49	1	1.317	0.841	0.89
	Akap6	blue	0.557	1	0.031		0.003	0.006	2.879	0.518	0.344	0.612		0.93	1	38				Fbxo11	turquoise	0.508	1	-0.026		0.059	1	0.522	0.889	0.892	0.892		1	1	11				Myo19	purple	0.137	1	-0.16		0.523	1	0.773	0.657	0.599
	Med13	turquoise	0.53	1	0.033		0.312	1	1.429	0.692	0.505	0.874		0	0	153				Rap2c	turquoise	0.365	1	0.044		0.242	1	0.669	0.899	0.947	0.842		1	1	39				Atl2	purple	0.725	1	0.015		0.249	1	1.587	0.747	0.499
	Rprd1a	blue	0.33	1	0.086		0.028	0.103	2.195	0.805	0.64	0.875		0.017	1	63				Prpf40a	turquoise	0.712	1	0.017		0.093	1	0.56	0.868	0.932	0.761		1	1	17				Creb1	blue	0.365	1	0.048		0.079	1	2.03	0.76	0.686
	Tnks	blue	0.061	1	0.222		0.011	0.023	2.492	0.899	0.834	0.923		0.121	1	56				Nalcn	blue	0.897	1	0.005		0.351	1	0.726	0.957	0.941	0.972		0	0.001	148				Mark2	magenta	0.223	1	-0.076		0.592	1	0.806	0.974	0.976
	Pptc7	blue	0.286	1	0.072		0.006	0.011	2.704	0.738	0.571	0.822		0	0	176				Ube2d3	turquoise	0.432	1	0.033		0.16	1	0.617	0.881	0.968	0.76		1	1	29				Tyk2	turquoise	0.118	1	-0.169		0.608	1	0.813	0.607	0.52
	Xiap	turquoise	0.503	1	0.032		0.003	0.006	2.869	0.641	0.617	0.677		1	1	26				Yipf5	turquoise	0.406	1	-0.029		0.036	0.107	0.484	0.905	0.947	0.85		1	1	4				Syt1	black	0.239	1	0.05		0.262	1	1.566	0.748	0.767
	Gatad2b	blue	0.091	1	0.312		0.004	0.007	2.827	0.884	0.902	0.849		1	1	22				Trim33	turquoise	0.126	1	0.057		0.409	1	0.754	0.836	0.927	0.802		1	1	24				Aff4	green	0.535	1	0.032		0.087	1	1.993	0.854	0.634
	B230219D22Rik	turquoise	0.793	1	0.012		0.419	1	1.33	0.747	0.704	0.803		0	0	111				Serinc3	turquoise	0.987	1	0.001		0.063	1	0.527	0.818	0.786	0.866		1	1	12				Mfsd14b	blue	0.698	1	0.02		0.926	1	1.037	0.685	0.761
	Tmed7	turquoise	0.829	1	0.012		0.291	1	1.452	0.875	0.831	0.913		0	0.001	76				Tpp2	turquoise	0.672	1	-0.017		0.042	0.153	0.495	0.857	0.945	0.726		0	0	193				Mff	black	0.124	1	0.059		0.88	1	1.061	0.84	0.784
	Nr2c2	blue	0.114	1	0.162		0.008	0.018	2.576	0.847	0.757	0.857		0.907	1	39				Cdc27	turquoise	0.389	1	0.035		0.158	1	0.615	0.864	0.905	0.805		1	1	3				Tug1	purple	0.669	1	-0.019		0.382	1	1.418	0.676	0.595
	Bmpr1a	turquoise	0.261	1	0.062		0.011	0.023	2.501	0.618	0.402	0.811		0	0	101				Mapk8	turquoise	0.42	1	0.029		0.248	1	0.673	0.797	0.78	0.862		1	1	64				Sem1	yellow	0.674	1	0.023		0.7	1	1.165	0.907	0.875
	Mecp2	turquoise	0.715	1	0.015		0.008	0.018	2.582	0.465	0.245	0.616		0.001	0.006	71				AW549877	turquoise	0.714	1	-0.017		0.376	1	0.738	0.825	0.879	0.791		0.57	1	101				Purb	blue	0.475	1	0.039		0.05	1	2.207	0.814	0.656
	Atrn	blue	0.569	1	0.022		0.058	1	1.965	0.584	0.487	0.684		0	0	124				Clcn3	blue	0.409	1	0.029		0.14	1	0.602	0.895	0.905	0.871		0	0	176				Ik	red	0.47	1	0.026		0.856	1	1.074	0.789	0.818
	Dgkb	turquoise	0.9	1	0.011		0.045	1	2.045	0.418	0.332	0.499		0	0	102				Tmem47	turquoise	0.49	1	0.042		0.274	1	0.687	0.84	0.834	0.867		1	1	19				Wdr12	greenyellow	0.716	1	0.012		0.836	1	1.085	0.818	0.812
	Ncor1	blue	0.47	1	0.025		0.002	0.004	3.065	0.7	0.549	0.77		0.006	1	66				Srsf10	brown	0.944	1	0.003		0.058	1	0.52	0.833	0.89	0.729		1	1	9				Rps23	yellow	0.836	1	0.012		0.859	1	0.93	0.773	0.748
	Gabrb2	blue	0.119	1	0.264		0.001	0.003	3.169	0.699	0.631	0.714		0.271	1	52				Kbtbd7	turquoise	0.903	1	0.006		0.116	1	0.582	0.885	0.925	0.813		0.947	1	87				Mast1	magenta	0.189	1	-0.184		0.467	1	0.746	0.872	0.882
	Aup1	green	0.932	1	-0.005		0.077	1	1.874	0.901	0.687	1		0.057	1	59				Pdzd8	blue	0.675	1	0.019		0.551	1	0.815	0.964	0.95	0.972		0	0	184				Tle2	turquoise	0.035	1	-0.362		0.038	1	0.429	0.853	0.855
	Togaram1	turquoise	0.428	1	0.04		0.272	1	1.475	0.645	0.69	0.635		0.001	0.012	70				Ube2g1	turquoise	0.681	1	0.018		0.079	1	0.546	0.929	0.961	0.855		1	1	21				Nkrf	blue	0.331	1	0.054		0.084	1	2.003	0.81	0.797
	Ttll7	turquoise	0.174	1	-0.063		0.112	1	1.759	0.525	0.505	0.713		0.057	1	59				Bmpr2	blue	0.195	1	0.07		0.728	1	0.888	0.982	0.971	0.991		0	0.001	150				Polg	turquoise	0.271	1	-0.066		0.566	1	0.794	0.459	0.434
	Purb	turquoise	0.698	1	0.019		0.262	1	1.487	0.686	0.644	0.741		0	0.001	76				Ptpn4	blue	0.282	1	0.059		0.471	1	0.781	0.922	0.959	0.861		0	1	138				Bicral	turquoise	0.094	1	-0.139		0.886	1	0.943	0.674	0.7
	Dgat1	turquoise	0.479	1	-0.05		0.009	0.019	2.564	0.361	0.243	0.44		1	1	19				Eif1a	turquoise	0.486	1	0.03		0.106	1	0.573	0.841	0.865	0.802		1	1	53				Atf2	blue	0.581	1	0.027		0.058	1	2.146	0.84	0.732
	Kpna3	turquoise	0.944	1	0.003		0.222	1	1.541	0.802	0.745	0.849		0.003	1	68				Lin7c	turquoise	0.25	1	0.061		0.057	1	0.519	0.849	0.862	0.857		0.973	1	84				A230050P20Rik	turquoise	0.037	1	-0.248		0.04	1	0.433	0.824	0.869
	Kif5b	turquoise	0.96	1	-0.003		0.077	1	1.874	0.559	0.339	0.746		0.658	1	45				Pura	blue	0.443	1	0.033		0.755	1	0.899	1	0.994	1		0	0	332				Trmt1	purple	0.395	1	-0.075		0.923	1	0.961	0.662	0.595
	Gcc2	blue	0.429	1	0.029		0.015	0.033	2.398	0.548	0.3	0.715		0	0	94				Lgalsl	blue	0.538	1	-0.022		0.016	0.038	0.434	0.749	0.902	0.663		1	1	12				Sirt7	turquoise	0.075	1	-0.214		0.634	1	0.826	0.581	0.652
	Zbtb33	turquoise	0.421	1	0.053		0.14	1	1.687	0.594	0.459	0.703		0	0	90				Tmed7	blue	0.514	1	0.035		0.523	1	0.803	0.938	0.937	0.921		1	1	52				Cnot7	red	0.885	1	-0.007		0.41	1	1.389	0.501	0.409
	Mtmr9	blue	0.165	1	0.178		0.001	0.001	3.527	0.783	0.797	0.768		0.017	1	63				Vapa	turquoise	0.73	1	0.012		0.529	1	0.806	0.886	0.923	0.892		1	1	4				Ndor1	turquoise	0.086	1	-0.176		0.17	1	0.575	0.755	0.807
	Dhx9	blue	0.35	1	0.036		0.096	1	1.805	0.583	0.37	0.718		0.373	1	50				Uba3	turquoise	0.942	1	0.003		0.183	1	0.632	0.866	0.894	0.823		1	1	17				Rpl15	greenyellow	0.135	1	0.057		0.418	1	1.382	0.768	0.908
	Tmem170b	turquoise	0.82	1	0.01		0.1	1	1.794	0.595	0.394	0.783		0	0	215				Vamp4	turquoise	0.542	1	0.022		0.187	1	0.636	0.879	0.889	0.867		1	1	12				Ice1	purple	0.086	1	-0.138		0.614	1	0.816	0.619	0.59
	Kbtbd7	turquoise	0.693	1	0.02		0.706	1	1.142	0.741	0.641	0.885		0	0	155				Serbp1	blue	0.891	1	-0.005		0.062	1	0.525	0.776	0.853	0.711		1	1	47				Dazap2	turquoise	0.678	1	-0.014		0.715	1	1.156	0.396	0.443
	Mar6	turquoise	0.951	1	0.003		0.001	0.001	3.53	0.565	0.391	0.705		0	0	107				Tardbp	turquoise	0.869	1	-0.005		0.062	1	0.525	0.869	0.901	0.804		1	1	18				Urod	red	0.645	1	0.024		0.601	1	0.81	0.678	0.673
	Ppig	turquoise	0.927	1	0.004		0.364	1	1.378	0.739	0.657	0.802		0.975	1	35				Adam10	turquoise	0.085	1	0.078		0.612	1	0.841	0.752	0.9	0.695		0	0	183				Cdc42bpb	pink	0.332	1	-0.107		0.513	1	1.298	0.932	0.898
	Polr2f	green	0.205	1	-0.065		0.49	1	1.276	0.944	0.957	0.839		1	1	27				Pfn2	turquoise	0.445	1	0.023		0.101	1	0.568	0.817	0.834	0.784		1	1	8				Ppp6c	greenyellow	0.178	1	0.063		0.151	1	1.779	0.717	0.729
	Rsbn1	turquoise	0.613	1	0.04		0.043	1	2.055	0.433	0.213	0.625		0.003	1	68				Dynlt3	turquoise	0.449	1	0.031		0.178	1	0.629	0.861	0.877	0.847		1	1	21				Ppp2r5e	blue	0.901	1	0.005		0.86	1	1.072	0.726	0.744
	Pdzd8	turquoise	0.535	1	0.029		0.008	0.018	2.575	0.668	0.507	0.782		0.024	1	62				Spryd7	turquoise	0.853	1	0.007		0.135	1	0.598	0.852	0.886	0.785		1	1	5				Vma21	purple	0.519	1	0.034		0.548	1	1.27	0.772	0.806
	Elfn2	blue	0.088	1	0.177		0.01	0.021	2.52	0.861	0.828	0.869		0.93	1	38				Sec62	brown	0.412	1	-0.038		0.013	0.03	0.422	0.923	0.927	0.886		1	1	13				Rnf25	turquoise	0.18	1	-0.107		0.713	1	0.862	0.566	0.558
	Usp29	blue	0.169	1	0.145		0.002	0.004	3	0.793	0.679	0.813		0.602	1	46				B230219D22Rik	blue	0.754	1	0.014		0.175	1	0.627	0.942	0.94	0.938		0	0	161				Bmpr1a	blue	0.631	1	0.03		0.109	1	1.905	0.74	0.585
	Arfgef1	turquoise	0.562	1	0.022		0.038	1	2.096	0.541	0.454	0.595		0	0	81				Psmc6	turquoise	0.287	1	0.042		0.304	1	0.703	0.848	0.924	0.782		1	1	6				Rab11fip3	yellow	0.322	1	-0.054		0.572	1	1.252	0.599	0.651
	Ndst1	blue	0.48	1	0.068		0.056	1	1.975	0.803	0.674	0.894		0.907	1	39				Naa50	turquoise	0.496	1	0.032		0.042	0.15	0.495	0.896	0.973	0.759		1	1	9				Snx2	black	0.605	1	0.022		0.927	1	1.036	0.786	0.832
	Gpm6a	turquoise	0.916	1	-0.005		0.09	1	1.825	0.634	0.533	0.718		0.544	1	47				Rab39b	turquoise	0.943	1	0.004		0.1	1	0.568	0.886	0.878	0.883		1	1	23				Atp5c1	red	0.591	1	0.019		0.602	1	1.231	0.915	0.963
	Tenm1	blue	0.127	1	0.137		0.108	1	1.769	0.644	0.606	0.674		1	1	24				Pafah1b2	blue	0.315	1	0.032		0.222	1	0.657	0.875	0.895	0.834		0	0	273				Tmem150a	turquoise	0.332	1	-0.1		0.734	1	0.872	0.552	0.634
	Lpgat1	turquoise	0.931	1	-0.004		0.018	0.044	2.329	0.553	0.379	0.701		0	0	171				Nipa2	turquoise	0.561	1	0.024		0.289	1	0.695	0.9	0.944	0.847		1	1	12				Mapk1	blue	0.811	1	0.011		0.545	1	1.273	0.732	0.833
	Nedd4	blue	0.157	1	0.055		0.073	1	1.89	0.718	0.438	0.929		0	0	232				Abcb7	blue	0.949	1	0.003		0.199	1	0.643	0.884	0.928	0.83		0	0	159				Naa40	purple	0.034	1	-0.142		0.668	1	1.186	0.597	0.832
	Tmem178b	blue	0.231	1	0.067		0.012	0.026	2.449	0.667	0.507	0.731		0.001	0.004	72				Serinc1	turquoise	0.903	1	0.005		0.12	1	0.586	0.883	0.894	0.856		1	1	22				Matr3	greenyellow	0.802	1	0.014		0.466	1	1.337	0.812	0.725
	Avl9	turquoise	0.662	1	0.02		0.212	1	1.556	0.712	0.739	0.702		0.989	1	33				Nrxn3	turquoise	0.728	1	0.016		0.379	1	0.74	0.815	0.88	0.76		1	1	66				Ptprn	magenta	0.153	1	-0.123		0.358	1	0.691	0.816	0.92
	Zfp148	turquoise	0.951	1	0.003		0.126	1	1.72	0.678	0.649	0.725		0	0	115				Agps	blue	0.568	1	0.021		0.097	1	0.565	0.775	0.865	0.659		1	1	55				Mir5125	turquoise	0.032	1	-0.467		0.007	0.018	0.329	0.818	0.834
	Snrpd2	brown	0.657	1	-0.022		0.545	1	1.238	0.776	0.748	0.76		1	1	24				Atp6ap2	turquoise	0.386	1	0.038		0.636	1	0.851	0.86	0.876	0.925		1	1	8				Tmem167	purple	0.237	1	0.054		0.5	1	1.308	0.698	0.778
	Cdc73	turquoise	0.361	1	0.043		0.093	1	1.815	0.755	0.64	0.866		0	0	128				Fam117b	blue	0.381	1	0.036		0.55	1	0.815	0.882	0.885	0.87		1	1	44				Dbn1	turquoise	0.06	1	-0.14		0.023	0.133	0.394	0.671	0.702
	Ppp2r5e	turquoise	0.796	1	0.009		0.053	1	1.991	0.469	0.357	0.556		0	0	111				Mff	turquoise	0.772	1	-0.01		0.317	1	0.709	0.821	0.87	0.77		1	1	21				Rps5	yellow	0.826	1	-0.013		0.931	1	0.965	0.846	0.882
	Map9	turquoise	0.154	1	0.053		0.206	1	1.565	0.529	0.504	0.598		0	0	115				Sp3	turquoise	0.75	1	-0.017		0.018	0.041	0.44	0.898	0.908	0.882		1	1	15				Pip5k1c	yellow	0.656	1	-0.033		0.665	1	0.84	0.663	0.753
	Kpna1	turquoise	0.766	1	-0.013		0.016	0.036	2.377	0.639	0.604	0.699		0.429	1	49				Ube2n	turquoise	0.778	1	-0.009		0.281	1	0.691	0.782	0.771	0.816		1	1	13				Nup188	turquoise	0.276	1	-0.082		0.413	1	0.719	0.6	0.659
	Nckap1	turquoise	0.855	1	-0.007		0.092	1	1.819	0.419	0.422	0.457		0	0	191				Ugcg	turquoise	0.372	1	0.04		0.171	1	0.625	0.818	0.852	0.789		1	1	61				Cript	greenyellow	0.933	1	0.004		0.485	1	1.321	0.743	0.747
	Impad1	turquoise	0.997	1	0		0.051	1	2.006	0.726	0.585	0.815		0.993	1	32				Fundc1	turquoise	0.111	1	0.07		0.273	1	0.686	0.792	0.868	0.755		1	1	36				Col7a1	turquoise	0.031	1	-0.485		0.027	1	0.404	0.786	0.779
	Heca	green	0.814	1	0.018		0.007	0.014	2.632	0.702	0.391	0.857		0.017	1	63				Bclaf1	brown	0.812	1	0.01		0.102	1	0.569	0.885	0.919	0.824		1	1	32				Ppm1e	blue	0.274	1	0.076		0.51	1	1.3	0.744	0.7
	Ckap5	blue	0.142	1	0.054		0.035	0.184	2.121	0.528	0.375	0.61		0.074	1	58				Naa15	turquoise	0.557	1	-0.021		0.003	0.006	0.359	0.824	0.851	0.842		1	1	28				Tmem63b	turquoise	0.078	1	-0.102		0.113	1	0.527	0.667	0.696
	Kpna4	turquoise	0.658	1	-0.021		0.59	1	1.209	0.683	0.601	0.842		0	0	82				Kras	turquoise	0.756	1	0.013		0.023	0.058	0.454	0.845	0.862	0.805		1	1	33				Rmnd5a	blue	0.546	1	0.024		0.47	1	1.334	0.712	0.706
	Atp2b3	blue	0.336	1	0.095		0.018	0.045	2.324	0.841	0.794	0.853		1	1	16				Lsm14a	blue	0.928	1	0.003		0.58	1	0.828	0.88	0.899	0.866		0.979	1	83				Ppm1a	blue	0.772	1	0.01		0.745	1	1.138	0.641	0.669
	Ctdspl2	turquoise	0.24	1	0.064		0.01	0.022	2.512	0.619	0.434	0.775		0	0.003	73				Fam8a1	turquoise	0.84	1	0.008		0.124	1	0.589	0.833	0.863	0.776		1	1	11				Hectd1	green	0.535	1	0.028		0.089	1	1.984	0.905	0.891
	Fam171b	turquoise	0.588	1	0.021		0.274	1	1.473	0.554	0.495	0.608		0	0	91				Msl2	blue	0.831	1	-0.008		0.287	1	0.694	0.757	0.865	0.654		1	1	63				Mapkbp1	turquoise	0.219	1	-0.099		0.435	1	0.73	0.662	0.77
	Celf1	blue	0.223	1	0.05		0.139	1	1.691	0.63	0.541	0.705		0.004	1	67				Nap1l2	turquoise	0.541	1	0.025		0.655	1	0.859	0.819	0.881	0.809		1	1	62				Pdlim7	turquoise	0.042	1	-0.193		0.151	1	0.559	0.76	0.843
	Sp3	turquoise	0.863	1	-0.009		0.63	1	0.843	0.649	0.78	0.677		0.017	1	63				Impad1	blue	0.373	1	0.045		0.572	1	0.824	0.952	0.928	0.963		0	0	176				Dnmt3a	turquoise	0.085	1	-0.123		0.07	1	0.479	0.686	0.682
	Ncoa2	turquoise	0.264	1	0.05		0.239	1	1.517	0.396	0.381	0.437		0	0	111				Slc9a6	turquoise	0.937	1	0.003		0.31	1	0.706	0.8	0.9	0.686		0	0.001	150				2310035C23Rik	tan	0.64	1	0.02		0.374	1	1.427	0.804	0.662
	Lin7c	turquoise	0.742	1	0.018		0.958	1	1.018	0.665	0.694	0.707		0	0	85				Bicd1	turquoise	0.4	1	0.043		0.126	1	0.591	0.827	0.818	0.847		1	1	28				Skiv2l	turquoise	0.337	1	-0.066		0.206	1	0.6	0.68	0.67
	Cul3	turquoise	0.728	1	-0.014		0.394	1	1.351	0.734	0.802	0.736		0.964	1	36				Vps26a	turquoise	0.163	1	0.053		0.577	1	0.826	0.766	0.815	0.803		1	1	5				Sar1a	black	0.701	1	-0.009		0.874	1	1.064	0.759	0.81
	Rab3a	green	0.624	1	-0.018		0.619	1	1.192	0.847	0.873	0.797		0.983	1	34				Gria2	turquoise	0.892	1	-0.007		0.085	1	0.552	0.857	0.904	0.779		1	1	22				Xk	blue	0.086	1	0.106		0.771	1	1.122	0.676	0.636
	Gabrb3	turquoise	0.694	1	0.015		0.598	1	1.204	0.499	0.408	0.614		0	0	105				Smim15	turquoise	0.823	1	-0.01		0.227	1	0.66	0.835	0.794	0.918		1	1	14				Rab14	purple	0.619	1	0.02		0.551	1	1.268	0.846	0.846
	Mapk1ip1	magenta	0.317	1	-0.077		0.041	1	2.074	0.814	0.525	0.975		0	0	92				Abce1	turquoise	0.915	1	-0.003		0.009	0.02	0.405	0.838	0.895	0.737		1	1	2				Cse1l	purple	0.373	1	0.037		0.311	1	1.499	0.617	0.538
	Ube3a	turquoise	0.507	1	0.041		0.058	1	1.964	0.406	0.212	0.573		0	0	146				Chm	turquoise	0.696	1	0.021		0.117	1	0.583	0.875	0.861	0.89		1	1	30				Smpd4	purple	0.049	1	-0.218		0.91	1	0.955	0.615	0.629
	Faxc	blue	0.07	1	0.206		0.004	0.008	2.791	0.791	0.64	0.87		0.002	1	69				Arl8b	turquoise	0.534	1	-0.021		0.096	1	0.563	0.805	0.832	0.771		1	1	53				Cfdp1	red	0.751	1	0.014		0.63	1	1.211	0.777	0.723
	Stag2	turquoise	0.321	1	0.052		0.196	1	1.581	0.664	0.671	0.679		0.187	1	54				Lemd3	turquoise	0.58	1	0.022		0.21	1	0.65	0.834	0.857	0.809		1	1	45				Pdzd8	blue	0.754	1	0.017		0.018	0.067	2.608	0.805	0.638
	Wac	turquoise	0.733	1	-0.013		0.072	1	1.898	0.568	0.534	0.614		0.271	1	52				Zfp638	turquoise	0.882	1	-0.006		0.15	1	0.61	0.797	0.915	0.632		0.609	1	100				Tubgcp6	magenta	0.402	1	-0.081		0.614	1	1.222	0.602	0.559
	Creb1	turquoise	0.683	1	0.019		0.03	0.123	2.174	0.627	0.49	0.726		0.009	1	65				Tug1	blue	0.458	1	-0.029		0.046	0.174	0.501	0.758	0.897	0.671		0	0	159				Nceh1	blue	0.25	1	0.048		0.79	1	1.111	0.767	0.819
	Clock	turquoise	0.72	1	0.016		0.09	1	1.826	0.534	0.441	0.6		0.017	1	63				Mef2a	turquoise	0.996	1	0		0.083	1	0.55	0.835	0.948	0.657		0.988	1	81				Zmat2	yellow	0.549	1	0.024		0.553	1	1.267	0.669	0.753
	Zfp871	blue	0.081	1	0.269		0.006	0.012	2.692	0.754	0.595	0.805		1	1	21				Nucks1	turquoise	0.342	1	-0.042		0.05	0.236	0.508	0.868	0.917	0.813		1	1	9				Ints1	turquoise	0.034	1	-0.181		0.97	1	1.014	0.551	0.662
	Dpp8	blue	0.383	1	0.047		0.184	1	1.601	0.551	0.255	0.875		0	0	191				Fmr1	turquoise	0.628	1	0.026		0.255	1	0.677	0.864	0.881	0.85		1	1	7				Sptbn4	turquoise	0.064	1	-0.161		0.033	1	0.419	0.788	0.802
	Pcdhac2	blue	0.508	1	0.117		0.018	0.044	2.327	0.744	0.606	0.82		0.151	1	55				Zfr	blue	0.823	1	0.01		0.229	1	0.661	0.876	0.908	0.833		0.979	1	83				Sacm1l	turquoise	0.818	1	0.012		0.614	1	0.816	0.344	0.275
	Prepl	blue	0.618	1	0.036		0.066	1	1.924	0.721	0.566	0.882		0	0	172				Stag2	blue	0.627	1	0.025		0.527	1	0.805	0.814	0.829	0.785		0	0	297				Cul5	tan	0.715	1	0.014		0.722	1	1.152	0.698	0.454
	Add2	blue	0.088	1	0.184		0.031	0.147	2.156	0.803	0.813	0.787		1	1	20				Brcc3	turquoise	0.879	1	0.006		0.085	1	0.552	0.842	0.892	0.743		1	1	6				Ipo7	brown	0.457	1	0.075		0.156	1	1.768	0.88	0.907
	Clcn3	turquoise	0.79	1	0.01		0.015	0.034	2.391	0.592	0.403	0.729		0.658	1	45				Ppid	brown	0.882	1	-0.006		0.073	1	0.539	1	1	0.961		1	1	41				Ckap5	green	0.495	1	0.028		0.452	1	1.35	0.764	0.702
	Usp31	turquoise	0.146	1	0.062		0.102	1	1.787	0.295	0.132	0.489		0	0.002	74				Creb1	blue	0.116	1	0.072		0.32	1	0.711	0.852	0.857	0.842		0.002	1	133				Sept7	greenyellow	0.506	1	0.039		0.294	1	1.522	0.828	0.72
	Rapgef2	blue	0.616	1	0.027		0.024	0.072	2.243	0.492	0.334	0.641		0	0	96				G3bp2	turquoise	0.379	1	0.034		0.112	1	0.579	0.806	0.758	0.911		1	1	12				Wnk2	magenta	0.246	1	-0.068		0.482	1	0.754	0.9	0.907
	Gpbp1	turquoise	0.811	1	0.01		0.155	1	1.655	0.713	0.745	0.702		0.998	1	29				Cfl2	turquoise	0.2	1	0.058		0.428	1	0.762	0.852	0.88	0.895		1	1	38				Zfp598	turquoise	0.051	1	-0.17		0.058	1	0.463	0.751	0.833
	Syt10	blue	0.214	1	0.191		0.013	0.029	2.435	0.706	0.604	0.734		0.602	1	46				Micu3	turquoise	0.652	1	-0.022		0.013	0.03	0.423	0.864	0.862	0.883		1	1	1				Ubr4	turquoise	0.217	1	-0.089		0.337	1	1.467	0.451	0.504
	Arcn1	turquoise	0.605	1	0.018		0.06	1	1.952	0.44	0.221	0.614		0	0	105				Aftph	turquoise	0.723	1	0.011		0.154	1	0.612	0.802	0.915	0.652		0	0	326				Tmem30a	purple	0.855	1	0.01		0.532	1	1.283	0.871	0.75
	Kpnb1	blue	0.115	1	0.053		0.013	0.029	2.43	0.631	0.494	0.689		0	0.001	76				Sep2	brown	0.713	1	0.016		0.021	0.051	0.45	0.86	0.937	0.739		1	1	23				Myo18a	yellow	0.253	1	-0.074		0.535	1	1.28	0.658	0.546
	Clvs1	blue	0.397	1	0.104		0.028	0.104	2.191	0.712	0.65	0.749		0.486	1	48				Msantd4	blue	0.208	1	0.05		0.331	1	0.717	0.817	0.781	0.853		0.002	1	133				Dnajb6	greenyellow	0.597	1	0.018		0.868	1	1.068	0.844	0.874
	Rb1cc1	turquoise	0.723	1	0.017		0.123	1	1.729	0.627	0.701	0.598		1	1	10				Plaa	turquoise	0.347	1	0.035		0.079	1	0.546	0.817	0.856	0.757		1	1	1				Tm9sf2	black	0.369	1	0.038		0.523	1	1.29	0.756	0.666
	Chm	turquoise	0.782	1	0.015		0.908	1	0.959	0.634	0.637	0.732		0	0	102				Lonp1	black	0.69	1	-0.017		0.227	1	0.66	0.786	0.828	0.701		1	1	8				Opa1	blue	0.423	1	0.032		0.281	1	1.54	0.75	0.81
	C77370	green	0.958	1	-0.004		0.065	1	1.926	0.877	0.678	0.913		1	1	27				Svip	blue	0.993	1	0		0.304	1	0.703	0.85	0.87	0.835		0.993	1	79				Plec	turquoise	0.085	1	-0.234		0.022	0.112	0.392	0.619	0.748
	Gmfb	turquoise	0.957	1	-0.002		0.626	1	1.188	0.689	0.638	0.78		0.658	1	45				Psmd3	black	0.232	1	-0.058		0.175	1	0.627	0.927	0.946	0.854		1	1	8				Stoml2	yellow	0.771	1	0.012		0.674	1	1.182	0.731	0.655
	Capza2	turquoise	0.67	1	-0.02		0.135	1	1.698	0.67	0.512	0.856		0	0	120				Dnm1l	turquoise	0.899	1	-0.005		0.037	0.11	0.486	0.834	0.861	0.784		1	1	4				Atrn	green	0.445	1	0.033		0.146	1	1.792	0.901	0.85
	Klhl3	blue	0.225	1	0.167		0.005	0.01	2.713	0.758	0.741	0.743		0.998	1	29				Top1	turquoise	0.625	1	0.02		0.004	0.006	0.361	0.864	0.916	0.801		1	1	65				Lonrf2	green	0.845	1	0.009		0.104	1	1.924	0.886	0.804
	Cand1	turquoise	0.898	1	0.005		0.028	0.104	2.191	0.557	0.351	0.703		0.043	1	60				Abhd17b	turquoise	0.512	1	0.038		0.268	1	0.684	0.883	0.932	0.827		1	1	23				Slmap	blue	0.771	1	0.016		0.462	1	1.341	0.762	0.811
	Megf9	turquoise	0.825	1	0.012		0.102	1	1.786	0.538	0.463	0.615		0	0	79				Grm5	turquoise	0.434	1	-0.04		0.027	0.071	0.464	0.844	0.917	0.749		0.934	1	88				Mgat2	black	0.33	1	0.042		0.407	1	1.393	0.727	0.599
	Stox2	blue	0.615	1	0.02		0.022	0.059	2.268	0.57	0.432	0.691		0	0	150				Rc3h1	blue	0.601	1	0.025		0.117	1	0.583	0.771	0.757	0.791		0	1	142				Zfyve9	green	0.245	1	0.046		0.202	1	1.667	0.836	0.887
	Pnmal1	blue	0.52	1	0.063		0.007	0.015	2.625	0.777	0.788	0.789		0.989	1	33				Rabgap1l	turquoise	0.624	1	-0.022		0.073	1	0.539	0.818	0.879	0.73		1	1	12				Kif21a	blue	0.515	1	0.02		0.006	0.014	3.082	0.733	0.528
	Lnpep	blue	0.38	1	0.146		0.002	0.004	3.008	0.678	0.718	0.66		0.844	1	41				Zmym2	turquoise	0.808	1	-0.01		0.139	1	0.601	0.798	0.843	0.728		1	1	28				Abcb7	blue	0.549	1	0.035		0.31	1	1.501	0.722	0.707
	Arsb	blue	0.65	1	0.056		0.011	0.024	2.478	0.715	0.643	0.772		0.949	1	37				Gdap1	blue	0.992	1	0		0.031	0.086	0.473	0.813	0.92	0.727		1	1	19				Actn1	turquoise	0.065	1	-0.105		0.13	1	0.542	0.559	0.65
	Abcb7	turquoise	0.71	1	-0.02		0.074	1	1.887	0.559	0.399	0.72		0.999	1	28				Zfp354c	turquoise	0.173	1	-0.057		0.012	0.026	0.417	0.835	0.917	0.778		1	1	7				Rbbp7	black	0.817	1	0.009		0.54	1	1.276	0.792	0.67
	Ctnnb1	blue	0.368	1	0.036		0.115	1	1.751	0.53	0.379	0.674		0	0	116				Glrb	turquoise	0.748	1	-0.017		0.049	0.226	0.507	0.872	0.961	0.719		1	1	54				Ndufb11	yellow	0.96	1	-0.003		0.387	1	1.413	0.978	1
	Cog5	blue	0.185	1	0.1		0.075	1	1.885	0.688	0.535	0.786		0.486	1	48				Arhgap12	turquoise	0.311	1	0.047		0.569	1	0.823	0.779	0.808	0.823		1	1	53				Msantd4	purple	0.352	1	0.043		0.918	1	0.959	0.783	0.798
	Timm13	brown	0.561	1	-0.033		0.998	1	0.999	0.627	0.684	0.553		1	1	21				Pdcd10	turquoise	0.587	1	0.025		0.289	1	0.695	0.866	0.91	0.818		1	1	3				Slc25a37	turquoise	0.595	1	-0.053		0.733	1	0.872	0.506	0.414
	Gria2	turquoise	0.862	1	0.009		0.226	1	1.535	0.51	0.318	0.729		0	0	89				Ythdf2	turquoise	0.274	1	0.042		0.024	0.063	0.457	0.841	0.857	0.827		1	1	6				Ssr3	purple	0.901	1	-0.006		0.859	1	1.073	0.726	0.821
	Atp6v0b	brown	0.267	1	-0.048		0.669	1	1.162	0.584	0.696	0.488		0.805	1	42				Tnks2	blue	0.405	1	0.038		0.386	1	0.743	0.834	0.793	0.869		0	0	272				Tomm20	blue	0.726	1	0.014		0.754	1	1.132	0.697	0.746
	Klhl34	blue	0.848	1	0.033		0.224	1	1.538	0.731	0.696	0.898		0.187	1	54				Wac	blue	0.326	1	0.036		0.302	1	0.702	0.918	0.956	0.852		0	0	337				Dhx34	turquoise	0.102	1	-0.153		0.085	1	0.497	0.555	0.466
	Pagr1a	turquoise	0.29	1	-0.102		0.777	1	1.104	0.385	0.454	0.39		0	0	80				Hdac2	brown	0.431	1	-0.028		0.058	1	0.52	0.818	0.869	0.708		1	1	9				Tomm7	yellow	0.878	1	-0.009		0.802	1	1.104	0.961	0.904
	Rab10	turquoise	0.863	1	0.008		0.397	1	1.349	0.548	0.461	0.655		0	0	112				Rhot1	blue	0.897	1	0.004		0.472	1	0.782	0.773	0.814	0.731		0	0	199				Tbc1d17	turquoise	0.499	1	-0.043		0.964	1	0.981	0.516	0.43
	Kifap3	turquoise	0.686	1	-0.014		0.048	1	2.025	0.51	0.28	0.731		0.057	1	59				Ap3s1	turquoise	0.933	1	-0.004		0.005	0.01	0.378	0.831	0.926	0.682		1	1	9				Crebrf	purple	0.729	1	0.017		0.731	1	1.147	0.711	0.8
	Myo5a	turquoise	0.897	1	-0.006		0.421	1	1.328	0.336	0.181	0.579		0	0	249				Agfg1	blue	0.804	1	-0.009		0.192	1	0.638	0.771	0.83	0.743		0.031	1	122				Gmfb	purple	0.356	1	0.046		0.711	1	1.159	0.782	0.781
	Bace1	blue	0.301	1	0.042		0.378	1	1.366	0.702	0.606	0.834		0	0	113				Rab18	turquoise	0.638	1	0.02		0.214	1	0.652	0.834	0.804	0.888		1	1	19				Ccdc186	green	0.348	1	0.037		0.081	1	2.017	0.742	0.545
	Wasf3	blue	0.52	1	0.046		0.035	0.183	2.124	0.751	0.656	0.82		1	1	26				Dmxl1	turquoise	0.496	1	0.035		0.149	1	0.609	0.794	0.809	0.773		1	1	5				Mar6	green	0.816	1	-0.012		0.154	1	1.772	0.815	0.739
	Hdgfl3	turquoise	0.746	1	0.014		0.289	1	1.455	0.558	0.452	0.69		0	0	242				Kifap3	blue	0.361	1	0.031		0.457	1	0.775	0.922	0.922	0.907		0	0	214				Ndufa4	yellow	0.616	1	0.028		0.394	1	1.405	0.972	0.892
	Dstyk	blue	0.232	1	0.06		0.011	0.024	2.476	0.553	0.325	0.68		0	0	105				Sub1	brown	0.603	1	-0.025		0.014	0.033	0.426	0.925	0.954	0.829		1	1	41				Eif4a2	black	0.715	1	0.016		0.994	1	1.002	0.792	0.887
	Ttc9c	turquoise	0.664	1	0.019		0.025	0.084	2.229	0.387	0.38	0.392		0.001	0.012	70				Gabrb3	blue	0.51	1	0.025		0.293	1	0.697	0.852	0.874	0.809		0.783	1	95				Impad1	blue	0.35	1	0.055		0.194	1	1.683	0.779	0.715
	Fam126b	turquoise	0.62	1	-0.027		0.641	1	1.178	0.608	0.754	0.592		0.964	1	36				Map9	turquoise	0.372	1	0.032		0.25	1	0.674	0.751	0.786	0.727		1	1	45				Arhgap39	magenta	0.686	1	-0.024		0.542	1	1.275	0.643	0.679
	Tanc2	blue	0.34	1	0.029		0.008	0.016	2.592	0.343	0.189	0.457		0	0	132				Ctcf	turquoise	0.96	1	-0.002		0.077	1	0.543	0.842	0.948	0.67		1	1	28				Pfdn5	yellow	0.47	1	-0.044		0.807	1	1.101	0.845	0.801
	Cuedc2	green	0.578	1	-0.022		0.084	1	1.847	0.888	0.961	0.774		0.429	1	49				Purb	blue	0.338	1	0.045		0.481	1	0.786	0.928	0.934	0.904		0	0	233				Rps25	yellow	0.96	1	0.003		0.907	1	0.954	0.781	0.655
	Golph3	turquoise	0.72	1	-0.016		0.008	0.017	2.583	0.537	0.392	0.683		0	0	81				Cnot6	turquoise	0.31	1	0.046		0.182	1	0.632	0.808	0.862	0.753		1	1	17				Tmem145	turquoise	0.328	1	-0.137		0.631	1	0.824	0.707	0.812
	Epm2aip1	turquoise	0.492	1	0.034		0.044	1	2.046	0.414	0.257	0.533		1	1	21				Map2	blue	0.79	1	0.011		0.345	1	0.723	0.812	0.82	0.799		0	0	243				Megf8	magenta	0.184	1	-0.098		0.396	1	0.711	0.725	0.757
	Nufip2	turquoise	0.048	1	0.131		0.236	1	1.521	0.49	0.42	0.681		0	0	202				Prkar2b	turquoise	0.167	1	0.062		0.167	1	0.621	0.799	0.901	0.701		1	1	19				Tmed7	blue	0.982	1	0.001		0.356	1	1.446	0.778	0.728
	Klhl11	blue	0.275	1	0.149		0.001	0.002	3.216	0.734	0.665	0.741		1	1	19				Fnip1	turquoise	0.816	1	-0.012		0.069	1	0.534	0.821	0.899	0.685		1	1	18				Alg11	blue	0.216	1	0.072		0.139	1	1.812	0.721	0.759
	Wdr48	blue	0.091	1	0.082		0.062	1	1.944	0.694	0.554	0.774		0.057	1	59				Ube2k	turquoise	0.702	1	-0.012		0.116	1	0.582	0.808	0.844	0.759		1	1	44				Cc2d1a	turquoise	0.039	1	-0.196		0.048	1	0.447	0.58	0.649
	Ptprn2	blue	0.233	1	0.135		0.023	0.07	2.252	0.709	0.568	0.783		0.373	1	50				Rab2a	turquoise	0.73	1	-0.012		0.247	1	0.672	0.805	0.916	0.681		0	0	161				Inpp5e	magenta	0.045	1	-0.126		0.792	1	0.899	0.531	0.731
	Tug1	turquoise	0.827	1	0.009		0.209	1	1.56	0.641	0.473	0.786		1	1	27				Cstf2t	blue	0.844	1	0.007		0.556	1	0.818	0.713	0.828	0.598		1	1	39				Fis1	yellow	0.432	1	0.043		0.314	1	1.496	0.938	0.856
	Nbr1	blue	0.098	1	0.048		0.048	1	2.022	0.588	0.495	0.643		0.964	1	36				Acsl4	blue	0.521	1	0.034		0.202	1	0.645	0.853	0.827	0.874		0	0	163				Rps27a	yellow	0.657	1	-0.027		0.755	1	0.882	0.731	0.742
	Pank3	turquoise	0.286	1	0.059		0.407	1	1.34	0.481	0.535	0.489		0.003	1	68				Sgpp1	blue	0.519	1	0.032		0.087	1	0.554	0.747	0.792	0.701		1	1	46				Dnaja2	greenyellow	0.286	1	0.04		0.978	1	0.988	0.947	0.806
	Ndufb7	brown	0.89	1	0.009		0.406	1	1.341	0.966	0.974	0.957		0.983	1	34				2310035C23Rik	brown	0.921	1	0.004		0.12	1	0.586	0.847	0.878	0.787		1	1	12				Cdc25b	turquoise	0.057	1	-0.177		0.731	1	0.87	0.699	0.72
	Hipk3	turquoise	0.235	1	0.052		0.627	1	1.187	0.546	0.455	0.692		0	0	139				Yipf4	turquoise	0.817	1	-0.011		0.329	1	0.715	0.871	0.903	0.849		1	1	9				Phf6	blue	0.421	1	0.046		0.065	1	2.101	0.709	0.624
	Dpm2	green	0.272	1	-0.045		0.459	1	1.299	0.667	0.77	0.545		0.964	1	36				Fam49b	turquoise	0.513	1	0.025		0.16	1	0.617	0.822	0.882	0.739		1	1	57				Cept1	red	0.805	1	0.012		0.908	1	0.954	0.552	0.497
	Senp5	blue	0.057	1	0.136		0.32	1	1.421	0.658	0.575	0.769		0	0	157				Itfg1	blue	0.276	1	0.05		0.432	1	0.764	0.839	0.879	0.779		1	1	52				Atp6ap2	greenyellow	0.433	1	0.04		0.536	1	1.28	0.925	0.916
	Prkacb	tan	0.238	1	0.057		0.213	1	1.554	0.895	0.659	1		0	0	106				Ssr3	blue	0.246	1	0.048		0.556	1	0.817	0.813	0.836	0.777		0.412	1	105				Napb	blue	0.079	1	0.085		0.416	1	1.383	0.722	0.819
	Tm9sf2	turquoise	0.903	1	-0.005		0.18	1	1.608	0.687	0.568	0.787		0.151	1	55				Rbbp7	blue	0.467	1	-0.025		0.304	1	0.703	0.725	0.886	0.601		0.812	1	94				Cab39	purple	0.428	1	0.031		0.911	1	0.955	0.675	0.784
	Plcxd3	blue	0.32	1	0.215		0.019	0.05	2.307	0.621	0.503	0.686		0	0	82				Itch	blue	0.336	1	0.036		0.52	1	0.802	0.867	0.868	0.853		0	0	382				Elavl1	greenyellow	0.734	1	0.011		0.518	1	1.294	0.673	0.452
	Cab39	turquoise	0.297	1	-0.036		0.106	1	1.775	0.597	0.396	0.915		0	0	143				Hipk3	blue	0.545	1	0.026		0.144	1	0.605	0.867	0.864	0.869		0	0	265				Obsl1	turquoise	0.097	1	-0.137		0.148	1	0.557	0.551	0.672
	Ccdc85c	blue	0.62	1	0.083		0.103	1	1.784	0.651	0.582	0.731		0.989	1	33				Ncln	black	0.454	1	-0.047		0.112	1	0.578	0.924	0.964	0.808		1	1	15				Kri1	magenta	0.159	1	-0.153		0.195	1	0.592	0.775	0.763
	Tlk1	turquoise	0.48	1	0.03		0.168	1	1.631	0.43	0.404	0.465		0.486	1	48				Pcm1	turquoise	0.201	1	0.057		0.114	1	0.58	0.778	0.89	0.649		1	1	59				Casd1	blue	0.907	1	0.006		0.225	1	1.626	0.657	0.719
	Selenot	turquoise	0.971	1	0.002		0.649	1	1.174	0.657	0.612	0.743		0.017	1	63				Pcmt1	turquoise	0.544	1	-0.016		0.117	1	0.583	0.782	0.785	0.787		1	1	17				Cad	magenta	0.474	1	-0.069		0.462	1	0.743	0.635	0.758
	Api5	turquoise	0.258	1	0.043		0.835	1	1.076	0.608	0.601	0.702		0.964	1	36				Rb1cc1	turquoise	0.81	1	0.011		0.19	1	0.637	0.781	0.873	0.658		0	0	177				Hnrnpc	red	0.473	1	0.027		0.793	1	0.899	0.656	0.653
	Uhmk1	turquoise	0.383	1	0.035		0.153	1	1.659	0.421	0.266	0.595		0	0	147				Rab10	blue	0.548	1	0.027		0.336	1	0.719	0.914	0.927	0.876		0	0	193				Cdan1	purple	0.094	1	-0.101		0.96	1	0.979	0.514	0.466
	Atad1	turquoise	0.561	1	0.029		0.294	1	1.45	0.588	0.486	0.684		0	0	81				Sh3bgrl	turquoise	0.102	1	0.097		0.28	1	0.69	0.762	0.864	0.693		1	1	14				Itch	blue	0.525	1	0.027		0.188	1	1.694	0.649	0.657
	Eif4ebp2	blue	0.35	1	0.144		0.196	1	1.58	0.704	0.492	0.916		0	0	115				Dram2	turquoise	0.104	1	-0.071		0.233	1	0.664	0.82	0.917	0.806		1	1	36				Trim23	purple	0.962	1	-0.003		0.243	1	1.596	0.733	0.657
	Tomm20	turquoise	0.682	1	0.015		0.029	0.114	2.177	0.387	0.264	0.477		0.001	0.006	71				Hdgfl3	blue	0.803	1	0.01		0.135	1	0.598	0.811	0.825	0.802		1	1	9				Pnpla8	blue	0.582	1	0.029		0.287	1	1.531	0.736	0.741
	Akap8l	green	0.772	1	-0.023		0.641	1	1.179	0.746	0.698	0.755		0	0.001	76				Cacybp	brown	0.957	1	0.003		0.131	1	0.595	0.856	0.92	0.747		1	1	18				Acrbp	purple	0.291	1	-0.142		0.946	1	1.027	0.486	0.492
	Gpalpp1	blue	0.529	1	0.021		0.024	0.074	2.236	0.457	0.278	0.583		0.151	1	55				Tm9sf3	blue	0.633	1	0.019		0.244	1	0.671	0.915	0.921	0.897		0	0	273				Ppan	turquoise	0.155	1	-0.133		0.638	1	0.827	0.584	0.554
	Irs2	blue	0.062	1	0.344		0.003	0.007	2.865	0.713	0.693	0.729		1	1	25				Ier3ip1	brown	0.682	1	-0.022		0.096	1	0.564	0.835	0.864	0.754		1	1	48				Ptpn4	blue	0.444	1	0.048		0.051	1	2.194	0.777	0.642
	Xpo7	blue	0.309	1	0.032		0.015	0.035	2.381	0.536	0.376	0.605		0.805	1	42				Rundc3a	black	0.393	1	-0.035		0.086	1	0.554	0.789	0.863	0.649		1	1	38				Wdr47	black	0.545	1	0.021		0.462	1	1.341	0.814	0.713
	Yme1l1	turquoise	0.797	1	0.012		0.306	1	1.436	0.676	0.722	0.653		1	1	22				Prkaa1	turquoise	0.645	1	-0.019		0.135	1	0.598	0.812	0.849	0.778		0.979	1	83				Ppig	blue	0.905	1	0.006		0.139	1	1.81	0.661	0.498
	Tmx3	turquoise	0.58	1	-0.03		0.59	1	1.209	0.532	0.512	0.624		1	1	27				Chmp5	turquoise	0.957	1	0.002		0.065	1	0.53	0.775	0.85	0.647		1	1	8				Tm9sf3	blue	0.471	1	0.033		0.451	1	1.35	0.756	0.889
	Rsf1	turquoise	0.296	1	0.038		0.045	1	2.04	0.519	0.421	0.609		0	0.001	75				Smarca5	turquoise	0.829	1	-0.01		0.112	1	0.579	0.794	0.866	0.687		1	1	33				Fnbp4	purple	0.099	1	-0.121		0.893	1	1.054	0.488	0.564
	Kdm5a	turquoise	0.09	1	0.068		0.076	1	1.877	0.492	0.476	0.57		0.989	1	33				Ptbp2	brown	0.885	1	-0.007		0.068	1	0.532	0.88	0.855	0.9		1	1	22				Spop	purple	0.248	1	0.053		0.678	1	0.846	0.659	0.659
	Pde7b	blue	0.07	1	0.147		0.044	1	2.047	0.495	0.303	0.65		0	0	123				Spopl	turquoise	0.254	1	0.063		0.166	1	0.621	0.767	0.85	0.67		0.647	1	99				Zfr2	turquoise	0.213	1	-0.096		0.135	1	0.547	0.729	0.767
	Supt16	blue	0.462	1	0.047		0.02	0.051	2.302	0.626	0.441	0.724		0	0	127				Tbc1d23	turquoise	0.977	1	0.001		0.337	1	0.72	0.785	0.79	0.798		1	1	21				Uqcrfs1	red	0.788	1	0.011		0.904	1	1.049	0.911	0.928
	Ids	turquoise	0.724	1	0.016		0.727	1	1.131	0.502	0.383	0.709		0	0	264				Mar7	turquoise	0.768	1	0.015		0.04	0.131	0.491	0.854	0.877	0.806		1	1	14				Glg1	brown	0.713	1	0.034		0.199	1	1.674	0.962	1
	Slc9a7	blue	0.21	1	0.179		0.003	0.006	2.878	0.69	0.484	0.766		0.057	1	59				Tsc22d2	turquoise	0.339	1	0.047		0.111	1	0.577	0.786	0.839	0.716		0.934	1	88				Zbtb48	turquoise	0.44	1	-0.065		0.387	1	0.706	0.664	0.702
	Fzd3	blue	0.289	1	0.098		0.309	1	1.433	0.647	0.51	0.806		0	0	86				Gabrg2	turquoise	0.731	1	0.017		0.042	0.151	0.495	0.838	0.901	0.726		1	1	14				Plcd1	turquoise	0.544	1	-0.047		0.238	1	0.621	0.412	0.349
	Bax	brown	0.594	1	0.029		0.116	1	1.748	0.401	0.427	0.469		0.997	1	30				Rad21	blue	0.651	1	0.018		0.283	1	0.692	0.804	0.796	0.802		1	1	16				Rai1	magenta	0.166	1	-0.094		0.734	1	0.872	0.792	0.764
	Mid2	turquoise	0.042	1	0.094		0	0	4.816	0.466	0.374	0.695		0	0	185				Eif4a2	blue	0.472	1	0.028		0.321	1	0.712	0.783	0.823	0.732		0.838	1	93				Ndufb9	yellow	0.547	1	0.036		0.353	1	1.45	0.934	0.845
	9330182L06Rik	turquoise	0.971	1	-0.002		0.289	1	1.455	0.44	0.335	0.586		0	0	186				Usp33	turquoise	0.616	1	0.021		0.078	1	0.544	0.803	0.787	0.825		1	1	28				Trim39	purple	0.091	1	-0.137		0.586	1	0.803	0.477	0.459
	Ilkap	green	0.173	1	-0.065		0.183	1	1.603	0.658	0.557	0.646		0.429	1	49				Emc7	turquoise	0.465	1	0.021		0.224	1	0.659	0.677	0.722	0.627		1	1	11				Xpo6	yellow	0.441	1	-0.043		0.31	1	1.501	0.586	0.607
	Wapl	turquoise	0.928	1	0.004		0.448	1	1.307	0.645	0.601	0.715		0	0	80				Psip1	turquoise	0.169	1	-0.056		0.036	0.106	0.484	0.778	0.869	0.697		1	1	7				Thumpd1	black	0.561	1	0.018		0.246	1	0.626	0.702	0.78
	Slc4a10	turquoise	0.303	1	0.049		0.109	1	1.766	0.491	0.371	0.651		0	0	117				Nxt2	blue	0.061	1	0.097		0.446	1	0.77	0.806	0.818	0.797		0.302	1	108				Nap1l2	black	0.274	1	0.051		0.804	1	1.103	0.621	0.551
	Pias1	blue	0.278	1	0.052		0.358	1	1.384	0.37	0.318	0.45		0.93	1	38				Zfp654	turquoise	0.683	1	-0.022		0.062	1	0.525	0.824	0.816	0.849		1	1	9				Rpl27	yellow	0.8	1	-0.016		0.771	1	1.122	0.943	0.927
	Hnrnpr	turquoise	0.434	1	0.031		0.099	1	1.796	0.449	0.345	0.53		0	0	93				Bcap29	turquoise	0.161	1	0.066		0.047	0.184	0.503	0.8	0.852	0.745		1	1	3				Sumo1	red	0.808	1	0.01		0.791	1	1.111	0.735	0.675
	Tmf1	turquoise	0.463	1	0.046		0.058	1	1.962	0.387	0.272	0.477		0	0	82				Gga1	black	0.84	1	-0.013		0.234	1	0.665	0.813	0.827	0.768		1	1	14				2010107E04Rik	yellow	0.991	1	-0.001		0.757	1	1.131	0.938	0.873
	Bicd1	turquoise	0.943	1	-0.004		0.328	1	1.413	0.473	0.333	0.614		1	1	20				Rab6a	turquoise	0.617	1	0.02		0.484	1	0.787	0.766	0.852	0.698		1	1	28				Oat	black	0.975	1	-0.001		0.883	1	1.06	0.569	0.548
	Psd3	blue	0.63	1	-0.024		0.079	1	1.868	0.364	0.213	0.663		0	0	234				Zfp451	turquoise	0.331	1	0.034		0.336	1	0.719	0.734	0.823	0.668		1	1	61				Vps26b	blue	0.527	1	-0.02		0.993	1	0.995	0.647	0.796
	Csnk2b	green	0.31	1	-0.036		0.703	1	0.873	0.829	0.962	0.717		1	1	19				Dars	turquoise	0.954	1	-0.002		0.128	1	0.593	0.78	0.802	0.743		1	1	19				Dnal1	green	0.148	1	0.054		0.495	1	0.76	0.601	0.647
	Cpsf6	turquoise	0.619	1	-0.023		0.255	1	1.496	0.623	0.528	0.74		1	1	19				Naa30	turquoise	0.7	1	0.019		0.036	0.103	0.484	0.803	0.819	0.767		1	1	1				Rabgap1l	purple	0.769	1	-0.015		0.58	1	1.246	0.789	0.89
	Anks1b	blue	0.331	1	0.04		0.475	1	1.287	0.434	0.417	0.526		0.373	1	50				Cggbp1	blue	0.197	1	0.055		0.164	1	0.62	0.797	0.757	0.855		1	1	62				Adam10	blue	0.893	1	0.007		0.167	1	1.741	0.775	0.729
	Opa1	turquoise	0.929	1	0.003		0.002	0.003	3.147	0.403	0.378	0.447		0.711	1	44				Papola	brown	0.407	1	0.024		0.036	0.107	0.485	0.656	0.795	0.5		1	1	11				Tmem214	turquoise	0.124	1	-0.105		0.955	1	0.977	0.606	0.663
	Cdkl5	blue	0.101	1	0.341		0.041	1	2.074	0.649	0.481	0.745		0.017	1	63				Khdrbs1	turquoise	0.277	1	0.036		0.348	1	0.725	0.776	0.887	0.681		1	1	16				Ssb	black	0.591	1	0.024		0.535	1	1.28	0.576	0.443
	Atp5g3	green	0.155	1	-0.055		0.357	1	1.384	0.576	0.613	0.495		0.949	1	37				Tmx4	blue	0.485	1	0.028		0.843	1	0.935	0.816	0.759	0.893		0	0	177				Pom121	pink	0.693	1	-0.037		0.744	1	1.139	0.896	0.766
	Cdc42bpb	blue	0.382	1	0.086		0.004	0.007	2.826	0.62	0.479	0.669		0.949	1	37				Nptn	turquoise	0.465	1	-0.025		0.021	0.05	0.45	0.846	0.935	0.704		1	1	8				Ndufv2	red	0.584	1	0.027		0.342	1	1.462	0.865	0.88
	Atg9a	blue	0.857	1	0.02		0.093	1	1.818	0.611	0.69	0.659		0.996	1	31				Klhl15	turquoise	0.343	1	0.053		0.188	1	0.636	0.834	0.875	0.786		1	1	18				Ids	blue	0.382	1	0.044		0.089	1	1.981	0.741	0.729
	Lrrc8b	blue	0.543	1	0.096		0.052	1	1.995	0.567	0.377	0.771		0	0	130				Crls1	brown	0.732	1	-0.015		0.089	1	0.557	0.88	0.849	0.899		1	1	48				Krtcap3	turquoise	0.254	1	-0.16		0.895	1	0.947	0.688	0.729
	Kif1b	green	0.893	1	-0.005		0.091	1	1.823	0.725	0.641	0.717		0.949	1	37				Nudcd2	turquoise	0.795	1	0.011		0.589	1	0.831	0.795	0.85	0.779		1	1	6				Sptbn1	green	0.995	1	0		0.32	1	1.489	0.77	0.813
	Aftph	turquoise	0.843	1	0.006		0.019	0.049	2.311	0.59	0.461	0.681		0.096	1	57				Eif4e	turquoise	0.872	1	0.006		0.03	0.083	0.471	0.709	0.839	0.511		1	1	11				Gnai1	blue	0.92	1	0.007		0.291	1	1.525	0.793	0.643
	Csrnp3	turquoise	0.443	1	0.031		0.001	0.002	3.225	0.348	0.299	0.386		0.983	1	34				Cdc73	blue	0.164	1	0.063		0.185	1	0.634	0.884	0.931	0.813		0	0	214				Pnn	turquoise	0.06	1	-0.116		0.223	1	0.611	0.632	0.699
	Dennd5a	blue	0.782	1	0.008		0.007	0.014	2.635	0.561	0.38	0.685		0	0	106				Ccdc47	blue	0.248	1	0.04		0.102	1	0.569	0.751	0.767	0.733		0.934	1	88				Thoc1	yellow	0.96	1	-0.003		0.807	1	1.101	0.578	0.714
	Lrrtm2	turquoise	0.456	1	0.039		0.026	0.09	2.213	0.466	0.568	0.434		1	1	14				Tmco1	brown	0.781	1	-0.011		0.105	1	0.572	0.765	0.793	0.7		1	1	17				Cbx5	blue	0.976	1	-0.001		0.064	1	2.11	0.723	0.774
	Med14	blue	0.351	1	0.035		0.004	0.007	2.844	0.523	0.264	0.683		0	0	114				Fyttd1	turquoise	0.589	1	0.021		0.027	0.074	0.466	0.793	0.799	0.795		1	1	31				Safb	turquoise	0.471	1	-0.047		0.861	1	0.932	0.609	0.738
	Sgip1	turquoise	0.399	1	0.035		0.753	1	1.117	0.478	0.55	0.471		0.907	1	39				Lamp2	blue	0.105	1	0.075		0.781	1	0.91	0.84	0.849	0.844		0	0	158				B230219D22Rik	blue	0.801	1	0.013		0.948	1	1.026	0.781	0.759
	Ssr3	turquoise	0.427	1	0.034		0.359	1	1.382	0.508	0.376	0.649		0	0	90				Yaf2	turquoise	0.298	1	0.036		0.113	1	0.579	0.795	0.909	0.645		1	1	33				Zfp142	magenta	0.408	1	-0.087		0.469	1	1.335	0.634	0.668
	Matr3	turquoise	0.655	1	-0.022		0.697	1	1.147	0.577	0.668	0.58		1	1	19				Elavl1	turquoise	0.512	1	0.019		0.121	1	0.587	0.737	0.813	0.622		1	1	9				Hdgfl2	turquoise	0.325	1	-0.062		0.31	1	0.664	0.635	0.7
	Arhgef9	blue	0.263	1	-0.051		0.149	1	1.668	0.287	0.292	0.536		0	0	227				Orc5	turquoise	0.985	1	0.001		0.018	0.04	0.439	0.728	0.812	0.594		1	1	49				Phf12	magenta	0.143	1	-0.112		0.218	1	0.608	0.745	0.826
	Gspt1	turquoise	0.14	1	0.069		0.179	1	1.61	0.351	0.251	0.466		0	0	151				Tnpo1	turquoise	0.753	1	0.014		0.173	1	0.626	0.746	0.72	0.802		1	1	14				Reps2	blue	0.39	1	0.048		0.404	1	1.396	0.809	0.705
	Pfdn6	green	0.731	1	-0.018		0.351	1	1.391	0.739	0.585	0.834		0.187	1	54				Slc30a4	blue	0.519	1	0.03		0.087	1	0.555	0.832	0.841	0.833		1	1	27				Chpf2	magenta	0.159	1	-0.126		0.141	1	0.551	0.727	0.722
	Scn2a	blue	0.21	1	0.064		0.248	1	1.505	0.384	0.375	0.418		0	0.003	73				Miga1	turquoise	0.577	1	0.023		0.056	1	0.517	0.798	0.914	0.614		1	1	13				Srp14	yellow	0.985	1	-0.001		0.723	1	1.151	0.758	0.696
	Nadk2	turquoise	0.259	1	0.065		0.019	0.048	2.312	0.458	0.357	0.547		0	0	92				Ugp2	turquoise	0.524	1	-0.028		0.041	0.14	0.493	0.802	0.815	0.795		1	1	21				Apc2	magenta	0.352	1	-0.073		0.441	1	0.733	0.838	0.812
	Mbnl2	turquoise	0.823	1	-0.011		0.841	1	0.931	0.514	0.656	0.501		1	1	11				Pnrc2	turquoise	0.132	1	0.078		0.173	1	0.626	0.755	0.832	0.69		1	1	9				Gpm6a	purple	0.948	1	0.004		0.365	1	1.436	0.731	0.664
	Cops9	brown	0.203	1	-0.062		0.178	1	1.611	0.679	0.541	0.777		0.658	1	45				Atl2	turquoise	0.569	1	0.021		0.056	1	0.517	0.796	0.789	0.807		1	1	39				Ttc9c	blue	0.425	1	0.039		0.668	1	1.186	0.722	0.676
	Chka	magenta	0.605	1	-0.031		0.047	1	2.029	0.961	0.837	0.947		0	0	120				Arih1	turquoise	0.254	1	0.035		0.049	0.227	0.507	0.78	0.797	0.777		1	1	46				Atp6v1a	blue	0.732	1	0.019		0.605	1	1.229	0.723	0.886
	Wdr44	turquoise	0.632	1	0.028		0.53	1	1.248	0.43	0.434	0.468		0	0	81				Rsrc2	brown	0.89	1	-0.006		0.08	1	0.547	0.913	0.957	0.818		0.719	1	97				Snap91	blue	0.748	1	0.014		0.148	1	1.787	0.775	0.714
	Syncrip	turquoise	0.705	1	-0.019		0.73	1	0.885	0.546	0.584	0.635		0.187	1	54				Morf4l2	brown	0.282	1	0.039		0.314	1	0.708	0.711	0.832	0.656		1	1	7				Plekha6	turquoise	0.485	1	-0.06		0.336	1	0.679	0.627	0.777
	Atp5e	green	0.346	1	-0.049		0.051	1	2.003	0.741	0.852	0.606		0.993	1	32				Galnt13	turquoise	0.629	1	-0.029		0.063	1	0.527	0.838	0.902	0.738		1	1	48				D5Ertd579e	blue	0.498	1	0.024		0.743	1	1.139	0.645	0.555
	Dnal1	blue	0.604	1	0.017		0.117	1	1.744	0.512	0.405	0.624		0.009	1	65				Snx10	turquoise	0.72	1	0.015		0.494	1	0.791	0.775	0.787	0.799		1	1	14				Dalrd3	turquoise	0.456	1	-0.077		0.463	1	1.34	0.528	0.508
	Spred1	turquoise	0.504	1	0.038		0.076	1	1.881	0.493	0.572	0.468		0.949	1	37				Rnf139	blue	0.18	1	-0.049		0.201	1	0.644	0.655	0.771	0.637		0.006	1	129				Stam	purple	0.831	1	0.01		0.231	1	1.616	0.674	0.737
	Dhx36	turquoise	0.386	1	-0.035		0.357	1	1.384	0.617	0.614	0.747		0.711	1	44				Eloc	brown	0.443	1	-0.032		0.05	0.238	0.508	0.995	0.961	1		0.752	1	96				Cfap65	turquoise	0.061	1	-0.287		0.375	1	0.699	0.695	0.818
	Hspa13	turquoise	0.543	1	0.036		0.012	0.026	2.453	0.489	0.266	0.691		0	0	152				Hif1a	turquoise	0.58	1	0.025		0.218	1	0.655	0.759	0.827	0.68		0	0	160				Hip1	turquoise	0.232	1	-0.083		0.807	1	0.906	0.422	0.545
	Lcor	blue	0.052	1	0.235		0.003	0.005	2.975	0.381	0.293	0.427		0	0	89				Gja1	blue	0.339	1	0.058		0.349	1	0.725	0.744	0.84	0.624		0.005	1	130				Cct3	red	0.897	1	0.004		0.37	1	0.697	0.812	0.929
	Srsf11	magenta	0.091	1	-0.11		0.015	0.035	2.378	1	1	1		0	0	110				Rab11a	brown	0.218	1	0.05		0.029	0.08	0.47	0.756	0.813	0.767		1	1	2				Mtch2	red	0.789	1	0.008		0.306	1	1.505	0.835	0.799
	Fbxw11	blue	0.174	1	0.049		0.024	0.079	2.233	0.515	0.371	0.607		0	0	224				Kcnd2	blue	0.399	1	0.048		0.209	1	0.649	0.885	0.887	0.862		0	0	208				Psmb7	red	0.548	1	0.023		0.47	1	1.334	1	1
	Pdha1	blue	0.439	1	0.037		0.002	0.004	2.985	0.482	0.408	0.523		0.024	1	62				C1d	brown	0.659	1	-0.021		0.062	1	0.525	0.821	0.838	0.761		1	1	4				Bcl9	magenta	0.287	1	-0.077		0.515	1	0.769	0.756	0.69
	Pdpr	blue	0.31	1	0.095		0.024	0.073	2.239	0.605	0.422	0.703		0.486	1	48				Cul5	turquoise	0.4	1	-0.027		0.03	0.086	0.473	0.744	0.814	0.66		1	1	13				Rpl36al	yellow	0.667	1	0.025		0.956	1	1.021	0.869	0.949
	Smcr8	blue	0.741	1	0.017		0.006	0.011	2.705	0.568	0.332	0.739		0	0	123				Mib1	blue	0.164	1	0.072		0.54	1	0.811	0.911	0.906	0.909		0	0	352				Usp32	green	0.651	1	0.022		0.102	1	1.929	0.844	0.78
	Rab39b	turquoise	0.836	1	-0.011		0.062	1	1.944	0.602	0.55	0.667		0.999	1	28				Chpt1	turquoise	0.533	1	0.032		0.136	1	0.599	0.798	0.823	0.76		1	1	62				Kpnb1	green	0.221	1	0.046		0.148	1	1.788	0.71	0.575
	Kras	turquoise	0.83	1	0.01		0.327	1	1.414	0.596	0.538	0.656		1	1	16				Anp32e	blue	0.402	1	0.032		0.31	1	0.706	0.701	0.757	0.627		0.979	1	83				Rps14	yellow	0.964	1	0.003		0.802	1	1.104	0.888	0.78
	Top2b	turquoise	0.928	1	-0.004		0.723	1	1.133	0.523	0.537	0.582		0.017	1	63				Ccdc88a	turquoise	0.799	1	-0.013		0.075	1	0.541	0.76	0.77	0.75		1	1	9				Kif5c	blue	0.417	1	0.039		0.646	1	1.2	0.677	0.732
	Rpl27	brown	0.466	1	-0.041		0.373	1	1.37	1	0.889	1		1	1	17				Mmgt1	blue	0.851	1	0.007		0.153	1	0.611	0.702	0.734	0.667		0.02	1	124				Sv2b	blue	0.993	1	0.001		0.669	1	0.842	0.64	0.759
	Ulk2	turquoise	0.774	1	0.011		0.633	1	1.183	0.403	0.47	0.399		0.012	1	64				Xrcc1	pink	0.341	1	-0.059		0.116	1	0.582	0.765	0.812	0.672		1	1	39				Slc30a4	blue	0.637	1	0.025		0.228	1	1.62	0.669	0.515
	Gse1	blue	0.258	1	0.148		0.149	1	1.669	0.638	0.598	0.675		1	1	13				Atxn7l3b	blue	0.787	1	0.008		0.147	1	0.607	0.761	0.779	0.746		0.269	1	109				Srcap	magenta	0.179	1	-0.08		0.875	1	0.938	0.686	0.671
	Thap12	turquoise	0.06	1	0.069		0.283	1	1.462	0.386	0.346	0.509		0	0	215				Zc3h12b	blue	0.269	1	0.052		0.962	1	0.984	0.888	0.88	0.913		0	0	175				Dzank1	blue	0.326	1	0.054		0.128	1	1.843	0.761	0.706
	Cbx5	turquoise	0.546	1	0.02		0.016	0.036	2.375	0.347	0.197	0.469		0	0.002	74				Shoc2	green	0.096	1	0.072		0.756	1	0.9	0.87	0.91	0.86		0	0	272				Zfp653	purple	0.478	1	-0.055		0.867	1	1.068	0.552	0.562
	Picalm	turquoise	0.764	1	-0.012		0.635	1	0.845	0.581	0.74	0.584		1	1	17				Pitpnm1	black	0.51	1	-0.039		0.058	1	0.52	0.813	0.888	0.653		1	1	3				Elob	yellow	0.812	1	0.014		0.444	1	1.358	1	0.939
	Pcdhgc3	blue	0.141	1	0.239		0.003	0.006	2.925	0.595	0.402	0.681		0.024	1	62				Syap1	turquoise	0.775	1	-0.013		0.087	1	0.554	0.785	0.821	0.727		1	1	44				Polr2g	red	0.752	1	0.013		0.693	1	1.17	0.861	0.953
	Fut9	turquoise	0.917	1	0.007		0.034	0.165	2.134	0.388	0.226	0.55		0.429	1	49				Sacm1l	turquoise	0.466	1	0.032		0.159	1	0.616	0.72	0.725	0.732		1	1	38				Srp72	blue	0.391	1	-0.026		0.845	1	0.924	0.578	0.686
	Fbxo11	turquoise	0.384	1	-0.035		0.088	1	1.833	0.568	0.613	0.632		0.006	1	66				Zfp763	turquoise	0.989	1	-0.001		0.071	1	0.537	0.775	0.83	0.68		1	1	58				Cct5	red	0.438	1	0.027		0.811	1	0.908	0.825	0.949
	Ankrd10	magenta	0.507	1	-0.043		0.008	0.018	2.582	0.626	0.275	0.843		0	0	101				Sh2b1	black	0.589	1	-0.026		0.075	1	0.541	1	1	0.934		1	1	7				Fbxl12	blue	0.187	1	-0.103		0.804	1	1.103	0.596	0.614
	Arfgef3	blue	0.257	1	0.132		0.001	0.001	3.467	0.591	0.478	0.618		1	1	23				Grsf1	turquoise	0.628	1	0.016		0.298	1	0.7	0.746	0.858	0.628		1	1	68				Aak1	blue	0.568	1	0.02		0.336	1	1.469	0.693	0.545
	Xkr4	blue	0.045	1	0.238		0.008	0.018	2.572	0.503	0.356	0.602		0.017	1	63				Fgfr1op2	turquoise	0.259	1	-0.044		0.017	0.04	0.438	0.803	0.952	0.607		1	1	14				Mink1	yellow	0.459	1	-0.059		0.633	1	0.825	0.586	0.694
	Nol11	blue	0.769	1	0.014		0.014	0.031	2.418	0.438	0.422	0.491		0	0	99				Gpaa1	black	0.617	1	-0.027		0.286	1	0.694	0.74	0.774	0.675		1	1	18				1700025G04Rik	green	0.454	1	0.038		0.402	1	1.398	0.767	0.72
	BC030336	tan	0.577	1	0.029		0.963	1	1.016	0.644	0.618	0.686		1	1	8				Crebrf	blue	0.338	1	0.041		0.98	1	0.992	0.798	0.838	0.773		0	0	320				Rufy3	black	0.11	1	0.053		0.779	1	1.118	0.691	0.849
	Spin1	turquoise	0.258	1	-0.037		0	0.001	3.886	0.448	0.534	0.557		0	0	131				Spns1	turquoise	0.078	1	-0.097		0.267	1	0.683	0.585	0.712	0.519		0.752	1	96				Daam2	turquoise	0.528	1	-0.056		0.983	1	1.008	0.512	0.636
	Cfp	blue	0.972	1	-0.004		0.121	1	1.734	0.408	0.415	0.525		0.32	1	51				Tmem106b	blue	0.265	1	0.051		0.895	1	1.047	0.885	0.873	0.936		0.02	1	124				Suclg1	red	0.946	1	-0.003		0.727	1	1.149	0.804	0.874
	Nedd8	brown	0.524	1	-0.031		0.655	1	1.171	0.945	0.904	0.923		0.907	1	39				Zfp655	turquoise	0.228	1	0.049		0.185	1	0.634	0.674	0.741	0.621		1	1	29				Akap13	turquoise	0.061	1	-0.226		0.348	1	0.685	0.666	0.689
	Dnajc5	blue	0.826	1	-0.007		0.094	1	1.812	0.542	0.617	0.626		0.006	1	66				Trim46	pink	0.281	1	-0.06		0.192	1	0.639	0.883	0.872	0.871		1	1	20				Rpl31	yellow	0.904	1	0.008		0.866	1	1.069	0.867	0.778
	Spag9	green	0.409	1	0.033		0.24	1	1.516	0.775	0.667	0.763		0.486	1	48				Cnot7	brown	0.449	1	-0.033		0.015	0.037	0.431	0.999	0.985	0.979		0	0	240				Ccdc47	purple	0.198	1	0.052		0.393	1	0.709	0.698	0.761
	Cntn1	green	1	1	0		0.097	1	1.802	0.687	0.549	0.72		0.975	1	35				Map2k4	black	0.189	1	0.038		0.108	1	0.575	0.673	0.69	0.643		1	1	24				Atg16l2	purple	0.343	1	-0.094		0.634	1	1.209	0.602	0.659
	Abi2	turquoise	0.828	1	-0.009		0.835	1	1.076	0.521	0.49	0.625		0.003	1	68				Map2k2	turquoise	0.579	1	-0.028		0.541	1	0.811	0.617	0.625	0.664		1	1	50				Stmn3	yellow	0.365	1	0.043		0.487	1	1.319	0.871	0.806
	Ccnt1	turquoise	0.814	1	-0.009		0.056	1	1.976	0.526	0.399	0.63		0.76	1	43				Slc33a1	turquoise	0.813	1	0.011		0.125	1	0.59	0.821	0.828	0.803		1	1	13				Tnpo3	green	0.718	1	0.017		0.532	1	1.283	0.832	0.774
	Snhg20	green	0.518	1	-0.044		0.096	1	1.807	0.644	0.471	0.724		0.429	1	49				Hikeshi	brown	0.735	1	-0.013		0.025	0.066	0.459	0.721	0.843	0.514		1	1	5				Tmem94	magenta	0.18	1	-0.126		0.167	1	0.572	0.795	0.803
	Uqcrq	brown	0.643	1	-0.027		0.424	1	1.326	0.902	0.93	0.814		0.486	1	48				Zfp938	brown	0.685	1	-0.02		0.158	1	0.615	0.717	0.86	0.522		1	1	5				Frmpd4	blue	0.314	1	0.061		0.075	1	2.05	0.742	0.739
	Luzp2	blue	0.104	1	0.283		0	0.001	3.885	0.556	0.278	0.695		0	0	79				Bag4	blue	0.372	1	0.046		0.455	1	0.774	0.852	0.784	0.931		1	1	34				Dok3	turquoise	0.273	1	-0.183		0.451	1	0.738	0.69	0.761
	Grm5	turquoise	0.95	1	0.003		0.6	1	0.83	0.438	0.413	0.586		0	0	119				Pex13	turquoise	0.134	1	0.059		0.178	1	0.63	0.767	0.813	0.754		1	1	4				Ddx55	purple	0.13	1	-0.114		0.492	1	0.758	0.523	0.596
	Cpsf2	blue	0.895	1	-0.005		0.41	1	1.338	0.312	0.249	0.508		0.003	1	68				Hsf2	brown	0.721	1	0.016		0.242	1	0.669	0.876	0.933	0.815		1	1	45				Nxt2	purple	0.172	1	0.081		0.347	1	1.456	0.685	0.885
	Map3k13	blue	0.701	1	0.038		0.495	1	1.272	0.498	0.508	0.62		0.429	1	49				Stam	blue	0.691	1	-0.016		0.383	1	0.741	0.746	0.774	0.759		1	1	63				Rpl4	yellow	0.821	1	0.009		0.949	1	1.025	0.474	0.62
	Romo1	brown	0.521	1	-0.039		0.235	1	0.655	0.649	0.599	0.763		0.271	1	52				Phip	brown	0.979	1	-0.002		0.038	0.122	0.488	0.701	0.789	0.563		1	1	10				Selenot	purple	0.283	1	0.056		0.963	1	1.018	0.733	0.791
	Dgkg	blue	0.049	1	0.243		0.01	0.021	2.53	0.591	0.633	0.584		1	1	16				Ppp2ca	turquoise	0.984	1	-0.001		0.033	0.092	0.479	0.759	0.799	0.686		1	1	28				Psma2	red	0.69	1	0.017		0.887	1	1.057	0.812	0.832
	Psmb4	green	0.191	1	-0.053		0.976	1	0.989	0.539	0.689	0.442		0	0	167				Sfr1	turquoise	0.492	1	0.029		0.053	1	0.512	0.814	0.872	0.709		1	1	16				4930556I23Rik	turquoise	0.119	1	-0.281		0.889	1	1.057	0.586	0.649
	Cggbp1	turquoise	0.642	1	0.02		0.422	1	1.328	0.547	0.448	0.7		0	0	206				Mindy3	turquoise	0.899	1	-0.005		0.062	1	0.525	0.801	0.9	0.635		1	1	14				4933427D14Rik	purple	0.305	1	-0.077		0.737	1	1.143	0.568	0.65
	Tm9sf3	turquoise	0.535	1	-0.025		0.026	0.089	2.217	0.527	0.447	0.635		0.602	1	46				Tmem63b	black	0.454	1	-0.038		0.146	1	0.607	0.83	0.805	0.819		1	1	14				Cherp	magenta	0.107	1	-0.122		0.27	1	0.641	0.894	0.913
	Palm2	blue	0.318	1	0.167		0.028	0.106	2.187	0.631	0.525	0.686		0.602	1	46				Actr10	lightcyan	0.459	1	-0.019		0.111	1	0.578	0.942	0.919	0.717		1	1	4				Stmn2	greenyellow	0.556	1	0.039		0.652	1	0.834	0.727	0.641
	Gmps	turquoise	0.89	1	0.006		0.04	1	2.079	0.542	0.408	0.662		0	0.001	75				Acbd5	turquoise	0.677	1	0.019		0.002	0.004	0.344	0.813	0.883	0.718		1	1	23				Tnks2	purple	0.442	1	0.041		0.2	1	1.671	0.771	0.7
	Ppp6c	turquoise	0.974	1	-0.001		0.635	1	1.182	0.595	0.691	0.569		1	1	21				Crk	blue	0.057	1	0.078		0.752	1	0.898	0.872	0.901	0.876		0	0	194				Flrt2	blue	0.613	1	0.033		0.058	1	2.146	0.659	0.518
	Cops2	turquoise	0.937	1	0.004		0.112	1	1.758	0.577	0.715	0.522		1	1	24				Ergic2	brown	0.624	1	-0.017		0.009	0.02	0.404	0.733	0.913	0.443		1	1	14				Nacad	magenta	0.068	1	-0.139		0.139	1	0.55	0.597	0.724
	Abhd13	turquoise	0.952	1	-0.003		0.829	1	0.926	0.494	0.399	0.718		0	0	123				Calm2	turquoise	0.696	1	0.014		0.032	0.09	0.477	0.794	0.857	0.676		1	1	5				Ptbp2	tan	0.812	1	-0.013		0.667	1	1.186	0.793	0.614
	Cbl	blue	0.096	1	0.338		0	0	4.351	0.66	0.651	0.66		0.997	1	30				9330132A10Rik	blue	0.224	1	0.088		0.4	1	0.75	0.833	0.796	0.871		0	0	156				Rabgap1	blue	0.78	1	0.011		0.416	1	1.384	0.497	0.35
	Snhg11	magenta	0.704	1	-0.04		0.007	0.014	2.635	0.558	0.269	0.725		0	0	93				Cnot2	brown	0.65	1	-0.014		0.004	0.007	0.364	0.909	0.938	0.844		0	0	168				Zdhhc17	turquoise	0.912	1	-0.004		0.823	1	1.092	0.438	0.519
	Mfsd14b	turquoise	0.967	1	0.002		0.072	1	1.895	0.571	0.535	0.605		0.964	1	36				BC030336	blue	0.322	1	0.05		0.293	1	0.697	0.864	0.84	0.884		0.862	1	92				Zfp148	blue	0.275	1	0.054		0.052	1	2.191	0.756	0.73
	Anapc11	brown	0.169	1	0.056		0.109	1	1.766	0.493	0.671	0.612		0.001	0.012	70				Cpeb4	turquoise	0.509	1	0.03		0.296	1	0.699	0.77	0.824	0.715		0.999	1	72				Cct8	greenyellow	0.479	1	0.025		0.931	1	1.034	0.864	0.778
	Sntg1	blue	0.88	1	0.01		0.029	0.109	2.184	0.361	0.246	0.532		0	0	178				Pak3	blue	0.658	1	0.021		0.529	1	0.806	0.816	0.858	0.763		0	0	269				Ddx54	magenta	0.33	1	-0.068		0.677	1	0.845	0.758	0.816
	Tcf20	blue	0.304	1	0.047		0.009	0.02	2.542	0.606	0.574	0.614		1	1	17				Paip1	brown	0.499	1	-0.031		0.094	1	0.562	0.788	0.834	0.687		1	1	14				Scaf4	turquoise	0.273	1	-0.064		0.321	1	0.671	0.542	0.536
	Elob	brown	0.314	1	-0.054		0.476	1	1.286	0.821	0.852	0.763		0	0.001	75				Psmd12	brown	0.822	1	0.007		0.084	1	0.551	0.646	0.873	0.388		1	1	24				Psmd6	red	0.951	1	-0.002		0.718	1	0.865	0.816	0.882
	Ppp4r3b	turquoise	0.264	1	0.053		0.659	1	1.168	0.565	0.672	0.572		0.32	1	51				Agap3	black	0.425	1	-0.047		0.046	0.175	0.502	0.894	0.855	0.913		1	1	14				Ankrd52	pink	0.694	1	-0.048		0.432	1	1.368	0.879	0.764
	Eif1ax	turquoise	0.738	1	-0.016		0.484	1	1.28	0.45	0.323	0.644		0.004	1	67				Tceal9	brown	0.941	1	-0.004		0.069	1	0.534	0.78	0.779	0.764		1	1	11				Cep250	turquoise	0.129	1	-0.157		0.454	1	0.74	0.658	0.74
	Serbp1	turquoise	0.657	1	-0.016		0.213	1	1.554	0.557	0.482	0.664		0.878	1	40				Zfand6	brown	0.276	1	-0.052		0.017	0.038	0.435	0.928	0.98	0.806		0	0	181				Stard7	greenyellow	0.74	1	-0.011		0.945	1	0.972	0.543	0.538
	Nr3c1	turquoise	0.232	1	0.061		0.199	1	1.576	0.381	0.168	0.684		0	0	131				Psma3	brown	0.898	1	0.005		0.151	1	0.61	0.935	0.921	0.955		0.016	1	125				B4galnt4	turquoise	0.101	1	-0.123		0.112	1	0.526	0.556	0.592
	Rbm27	turquoise	0.276	1	0.051		0.606	1	1.199	0.458	0.363	0.58		1	1	20				Map4k5	brown	0.734	1	-0.014		0.059	1	0.522	0.862	0.885	0.793		1	1	32				Pdha1	blue	0.504	1	0.036		0.306	1	1.506	0.699	0.681
	Puf60	turquoise	0.264	1	-0.037		0.868	1	0.942	0.289	0.346	0.294		1	1	19				Fam91a1	blue	0.718	1	-0.014		0.107	1	0.574	0.671	0.729	0.657		0	0	333				Spag9	blue	0.3	1	0.047		0.366	1	1.435	0.588	0.442
	Epc2	turquoise	0.334	1	0.042		0.877	1	1.056	0.522	0.564	0.592		0	0	122				Mgat2	turquoise	0.411	1	0.031		0.122	1	0.587	0.726	0.757	0.684		1	1	8				Col4a1	turquoise	0.132	1	-0.118		0.873	1	0.937	0.421	0.385
	Ndufa13	brown	0.422	1	-0.052		0.578	1	0.821	0.878	0.846	0.863		0.151	1	55				Txnl1	brown	0.754	1	-0.012		0.104	1	0.571	0.817	0.839	0.757		1	1	14				Rsl1d1	greenyellow	0.752	1	0.011		0.947	1	0.973	0.702	0.723
	Pde4d	blue	0.513	1	0.063		0.023	0.063	2.26	0.465	0.305	0.581		0	0	168				Eny2	brown	0.874	1	-0.006		0.095	1	0.562	0.583	0.704	0.419		1	1	10				Atp5j	yellow	0.788	1	-0.014		0.43	1	1.371	0.891	0.821
	Chpt1	turquoise	0.992	1	-0.001		0.635	1	1.182	0.365	0.249	0.541		0.017	1	63				Ola1	turquoise	0.889	1	0.005		0.024	0.062	0.457	0.789	0.758	0.849		1	1	16				Agps	purple	0.853	1	0.008		0.913	1	1.043	0.738	0.855
	Rab5b	blue	0.514	1	0.031		0.067	1	1.918	0.584	0.382	0.737		0.012	1	64				Tmem170b	blue	0.278	1	0.048		0.436	1	0.766	0.87	0.908	0.811		0	0	247				Ensa	red	0.395	1	0.024		0.585	1	1.243	0.783	0.764
	Pebp1	green	0.798	1	-0.01		0.208	1	1.562	0.725	0.734	0.706		1	1	24				Ppp1cb	turquoise	0.926	1	-0.004		0.029	0.081	0.471	0.79	0.873	0.645		1	1	12				Adgrb3	blue	0.918	1	0.004		0.581	1	1.246	0.64	0.783
	Zdhhc1	green	0.521	1	-0.046		0.483	1	1.281	0.638	0.421	0.767		0.121	1	56				Ypel5	turquoise	0.852	1	0.007		0.036	0.102	0.483	0.731	0.788	0.635		1	1	11				Fcho1	turquoise	0.098	1	-0.175		0.014	0.044	0.366	0.699	0.679
	Commd4	brown	0.413	1	-0.041		0.388	1	1.357	0.551	0.437	0.663		0	0	206				Bmt2	turquoise	0.58	1	0.027		0.539	1	0.81	0.75	0.856	0.672		0.838	1	93				Zhx1	blue	0.506	1	0.036		0.296	1	1.519	0.76	0.683
	Dnajc16	blue	0.153	1	0.06		0.045	1	2.041	0.595	0.337	0.752		0	0.002	74				Klhl9	turquoise	0.072	1	0.096		0.137	1	0.599	0.769	0.765	0.875		1	1	11				Fbxl19	turquoise	0.185	1	-0.1		0.193	1	0.591	0.361	0.427
	Cox6a1	brown	0.532	1	-0.03		0.184	1	1.602	0.591	0.471	0.677		1	1	15				Wasl	turquoise	0.556	1	-0.02		0.395	1	0.747	0.752	0.78	0.763		1	1	4				Srpk2	purple	0.285	1	0.04		0.092	1	1.968	0.697	0.59
	Chkb	green	0.59	1	-0.04		0.106	1	1.775	0.589	0.408	0.662		0	0	166				B4galt6	blue	0.771	1	0.01		0.3	1	0.701	0.762	0.778	0.736		0	0	310				Zfand6	yellow	0.924	1	0.005		0.871	1	1.066	0.55	0.502
	Ptov1	green	0.921	1	0.005		0.607	1	0.833	0.723	0.72	0.913		0	0	116				Bnip3l	turquoise	0.23	1	-0.048		0.067	1	0.531	0.766	0.829	0.723		1	1	5				Rimbp2	pink	0.76	1	-0.042		0.536	1	1.28	0.946	0.897
	Nol4	tan	0.2	1	0.086		0.208	1	1.561	0.56	0.396	0.575		0.004	1	67				Yes1	turquoise	0.424	1	0.049		0.016	0.037	0.432	0.736	0.78	0.67		1	1	24				Acin1	turquoise	0.159	1	-0.11		0.098	1	0.511	0.747	0.793
	Pcdh17	blue	0.348	1	0.062		0.018	0.044	2.328	0.257	0.1	0.408		0	0	198				Tmx3	turquoise	0.308	1	0.053		0.356	1	0.729	0.725	0.779	0.693		1	1	55				Ube2n	black	0.413	1	0.029		0.664	1	0.84	0.792	0.792
	Ndufa2	brown	0.41	1	-0.052		0.373	1	1.37	0.877	0.744	0.894		0.999	1	28				Katnb1	black	0.699	1	-0.023		0.144	1	0.605	0.912	0.883	0.895		1	1	3				Rgp1	magenta	0.281	1	-0.058		0.294	1	0.655	0.656	0.619
	Ccny	turquoise	0.908	1	0.005		0.462	1	1.296	0.369	0.457	0.345		0.001	0.012	70				Snx16	turquoise	0.266	1	0.064		0.073	1	0.539	0.789	0.863	0.692		1	1	67				Hdgfl3	purple	0.746	1	0.015		0.183	1	1.705	0.764	0.716
	Fbxl6	green	0.742	1	-0.02		0.181	1	1.606	0.827	0.652	0.903		0	0	119				Ppp1r16a	black	0.112	1	-0.081		0.223	1	0.658	0.899	0.947	0.804		1	1	10				Anks1b	brown	0.726	1	0.016		0.056	1	2.165	0.722	0.748
	Ndufa11	brown	0.45	1	-0.046		0.774	1	0.903	0.954	0.947	0.875		1	1	15				Ranbp3	purple	0.691	1	-0.017		0.142	1	0.603	0.87	0.905	0.816		1	1	20				Rpl9	yellow	0.85	1	-0.01		0.872	1	0.937	0.625	0.61
	Map2	turquoise	0.637	1	0.02		0.085	1	1.844	0.414	0.284	0.523		0	0	80				Negr1	blue	0.803	1	0.013		0.414	1	0.756	0.791	0.853	0.714		0.957	1	86				Vamp4	purple	0.931	1	-0.004		0.724	1	0.867	0.765	0.709
	Ankrd17	tan	0.35	1	0.029		0.068	1	1.914	0.631	0.315	0.85		0	0	88				Tmem167	blue	0.092	1	0.066		0.121	1	0.586	0.723	0.771	0.671		0.783	1	95				Cds2	green	0.327	1	0.051		0.237	1	1.606	0.843	0.806
	Trim23	turquoise	0.823	1	-0.011		0.206	1	1.566	0.513	0.379	0.691		0	0	106				Smarcad1	turquoise	0.86	1	0.008		0.175	1	0.628	0.678	0.792	0.526		1	1	6				Ttc3	green	0.438	1	0.032		0.036	1	2.331	0.784	0.778
	Lamtor2	green	0.171	1	-0.065		0.23	1	1.53	0.666	0.637	0.653		0.121	1	56				Arxes2	brown	0.725	1	0.019		0.157	1	0.614	0.815	0.864	0.761		1	1	15				Cyfip2	brown	0.2	1	0.06		0.171	1	1.731	0.754	0.841
	Mef2d	blue	0.315	1	0.053		0.026	0.093	2.209	0.491	0.303	0.624		0	0.001	75				Fbxl5	turquoise	0.964	1	-0.002		0.188	1	0.636	0.76	0.775	0.744		1	1	4				Shkbp1	turquoise	0.056	1	-0.297		0.055	1	0.458	0.769	0.811
	Stx5a	green	0.249	1	-0.05		0.051	1	2.002	0.59	0.461	0.605		0.907	1	39				Dhx15	blue	0.839	1	0.007		0.04	0.133	0.492	0.686	0.712	0.688		1	1	69				Mbnl2	purple	0.562	1	0.033		0.019	0.08	2.585	0.598	0.488
	Ap2s1	green	0.592	1	-0.026		0.16	1	1.645	0.539	0.41	0.627		0	0	137				Gtf3c3	turquoise	0.953	1	0.003		0.858	1	0.941	0.727	0.824	0.706		0	0.001	150				Adcy6	turquoise	0.129	1	-0.156		0.055	1	0.458	0.604	0.587
	Alkbh8	blue	0.286	1	0.084		0.068	1	1.913	0.495	0.364	0.582		0.057	1	59				Stt3b	turquoise	0.852	1	-0.006		0.03	0.083	0.471	0.689	0.743	0.598		1	1	6				Chd4	magenta	0.29	1	-0.065		0.891	1	1.055	0.754	0.872
	Ubr3	turquoise	0.974	1	0.001		0.328	1	1.413	0.483	0.381	0.608		0	0	109				Mtpn	blue	0.894	1	0.006		0.606	1	0.838	0.792	0.871	0.71		0	0	174				Cpt1c	turquoise	0.274	1	-0.073		0.834	1	1.086	0.479	0.524
	Dld	turquoise	0.601	1	-0.021		0.036	0.22	2.113	0.541	0.326	0.8		0	0	152				Kpna1	blue	0.715	1	0.015		0.395	1	0.747	0.854	0.905	0.783		0	0	409				Slc25a4	red	0.786	1	0.009		0.356	1	1.446	0.846	0.891
	Zbtb41	turquoise	0.91	1	0.006		0.354	1	1.388	0.392	0.329	0.468		0.993	1	32				Upf2	turquoise	0.886	1	-0.005		0.136	1	0.599	0.674	0.69	0.66		0.025	1	123				Nipa1	blue	0.614	1	0.027		0.184	1	1.704	0.751	0.738
[truncated: 5,909 more rows]
[truncated: 9 more columns]

## Sheet: Table 4 - DE (GO)
Table 4 - GO annotation for DE genes
Annotations for DE genes is followed by annotations for enriched modules
CeA-DE
Component
[truncated: 80 more rows]

## Sheet: Table 5 - DV
Supplemental Table 5 - Lists of genes DV in each brain region (FDR < 0.05). Note FDR = 0, < 0.0001.																																		All 3 regions	Hub-PL	Hub-CeA	Hub-SH			PL vs CeA		PL vs SH		SH vs CeA
[truncated: 482 more rows]

[truncated: 4 more sheets: Table 6 - DV (GO), Table 7 - DW, Table 8 - DW (GO), Table 9 - Misc]
